# Supplementary material for: Mating-induced patterns of spermathecal fluid protein expression in two eusocial insect species, Lasius niger and Apis mellifera
Source: Research Square preprint supplement (doi:10.21203/rs.3.rs-6831102/v1), 2025-07-10
Supplement: Supplementary file 2 [file 8f8ca3d12f5967d4b35ec652.xlsx]

## Sheet: Lasius data
Protein.Group	First.Protein.Description	Lasius_3-31-2023_Slot1-01_1361.d	Lasius_3-31-2023_Slot1-02_1363.d	Lasius_3-31-2023_Slot1-03_1365.d	Lasius_4-1-2023_Slot1-07_1373.d	Lasius_4-1-2023_Slot1-09_1377.d	Lasius_4-2-2023_Slot1-13_1385.d	Lasius_4-2-2023_Slot1-14_1387.d	Lasius_4-2-2023_Slot1-15_1389.d	Lasius_4-2-2023_Slot1-16_1391.d	Lasius_4-2-2023_Slot1-17_1393.d	Lasius_4-2-2023_Slot1-18_1395.d	Lasius_4-2-2023_Slot1-19_1397.d	Lasius_4-2-2023_Slot1-20_1399.d	Lasius_4-3-2023_Slot1-21_1401.d	Lasius_4-3-2023_Slot1-24_1406.d	Lasius_4-3-2023_Slot2-25_1408.d	Lasius_4-3-2023_Slot2-26_1410.d	Lasius_4-3-2023_Slot2-27_1412.d	Lasius_4-3-2023_Slot2-28_1414.d	Lasius_4-3-2023_Slot2-29_1416.d	Lasius_4-4-2023_Slot2-30_1418.d	Lasius_4-4-2023_Slot2-32_1422.d	Lasius_4-4-2023_Slot2-33_1424.d	Lasius_4-4-2023_Slot2-34_1426.d	Lasius_4-4-2023_Slot2-35_1428.d	Lasius_4-4-2023_Slot2-36_1430.d	Lasius_4-4-2023_Slot2-37_1432.d	Lasius_4-4-2023_Slot2-38_1434.d	Lasius_4-5-2023_Slot2-04_1436.d	Lasius_4-5-2023_Slot2-05_1438.d	Lasius_4-5-2023_Slot2-06_1440.d	Lasius_4-5-2023_Slot2-08_1442.d	Lasius_4-5-2023_Slot2-10_1444.d	Lasius_4-5-2023_Slot2-11_1446.d	Lasius_4-5-2023_Slot2-12_1448.d	Lasius_4-6-2023_Slot2-23_1452.d
A0A0J7JT71;A0A0J7KIP4;A0A0J7KSG7;A0A0J7KSL7	Histone H2A (Fragment)			1103.91				1937.55		1709.82					1219.15
A0A0J7JTK4	Microtubule-associated protein futsch (Fragment)	807.602		938.01			187.736	462.463		135.932		1631.19	1491.43	653.888	1153.51	990.826			1301.58				1729.24	1461.57			2744.04	707.178					3020.46			7516.49	2031.82
A0A0J7JUB2	Cytochrome p450 9e2	3604.8					813.563	256.846			1731.01	1489.11	2414.66	815.953	494.97	743.669		1177.91	977.058				3800.1	1468.22			2166.26	1579.9	2390.57			655.367				858.347
A0A0J7JUM2	Alanine transaminase (Fragment)	6105.33	3469.48	5493.33			4686.09	6243.48		2100.83	9392.97	3878.74	11364.3	5416.53	9970.69	2966.56		5122.83	3225.44	4381.94	3787.48	3808.5	6875.96	2722.54			6374.27	3269.78	2111.11			5787.45	2073.22	937.186		5125.31
A0A0J7JV67	Xanthine dehydrogenase (Fragment)	3751.96		1142.59			8325.7	3074.28		2437.02	5286.69	4540.02	6662.71	3824.06	3310.25	2498.95		7174.57	3932.47	7688.76	3893.16		15865.2	5921.45	2219.45	6230.53	7519.59	5687.18	5340.52	4405.96		4680.51	2503.84			7157.18	7497.12
A0A0J7JV95;A0A0J7L122	Fatty acid synthase	3777.82							6351.42					1126.75									831.396	2612.76			2510					1140.89
A0A0J7JV98	Gag-pol polyprotein			9716.05			1185.47	3082.22																				3965.56
A0A0J7JVD4	Epidermal retinal dehydrogenase 2 (Fragment)	808.558		2985.95									989.885						2286.54														1045.54
A0A0J7JVN0	Translation machinery-associated protein 7 homolog	3311.92	7039.09	16362.8	2020.72	1657.8	7633.63	3467.14		2884.19	22719.5	3762.35	2576.76	2170.14	3188.14		2350.11	3471.66	5368.1	17369.6	7296.84		1246.43	365.667	2754.25			4216.81	11151				1576.77
A0A0J7JVU4	Uncharacterized protein	8546.22		12893.3		2479.64	8159.1	10326.7		12529.8	1133.39	11749.8	7531.81	9699.21	6363.7	14681.5	7745.16	6142.99	7871.08	7473.3	2971.61		7636.09	26190.9	3481.81	7155.12	14215.9	6175.6				6536.75	10736.2			38409	6489.34
A0A0J7JVV6	Fatty acid synthase	2329.55		655.228															854.449
A0A0J7JX45;A0A0J7MTF7	Fatty acid synthase (Fragment)	3048.67							3495.61		2531.8		6687.43	1172.39	688.818					5766.09	1606.2	3642.09		255.261					2694.62			3517.07
A0A0J7JX70	DUF5641 domain-containing protein (Fragment)						405.944				2001.85				503.592								1033.49						1579.38
A0A0J7JX97	Lysyl-trna synthetase (Fragment)		37043.2		24584.3	25722.7	3274.61				12438.8		1295.31	1985.69	1664.09		7651.99	19374.6		17385.1	14580.1	12168.4	6700.33	8936.84	24340.2	28784		14377.6	13476.5	25963.6				43910.2		5959.32	33512.2
A0A0J7JXA4	Alpha-like protein (Fragment)						5469.15				873.799																						14408.5
A0A0J7JXI6	Iq domain-containing protein d-like protein	18670.9		17649.1		23577.2	22781.5	21548.4	8835.06	24495.8		18420.2	16222.7	20446.9	16877.3	15383.7		19386	16454.1	16440.1	4336.4		22154.1	8363.27	2459.6	17478	12565.7	25867.4			7256.01	13026	10444			11888.1	29516.3
A0A0J7JXI9	Hydrocephalus-inducing-like protein (Fragment)	22791.3		30537.9		1591.49	18747.3	22647.8	5729.8	27534.3		17136.4	23702.2	25826.2	20547.4	33790		13554.5	17797.8	14079.4	1852.88		20714.3	8924.65	1173.84	14663.7	13823.5	17431.6			10071.2	18193.1	8758.86		64114.6	8522.78	23138.7
A0A0J7JXJ0	30s ribosomal protein s12	3321.78	10610.4		6575.08	7685.25	623.288				3006.8					998.456	45476.1	5104.94		5510.09	3136.1	4840.92			8069.82	5144.4		2533.92	2644.09					4094.9			7948.45
A0A0J7JXK5	Rna-directed dna polymerase from mobile element jockey-like protein (Fragment)	2949.53	15514.7	1229.97	6180.65	13037.8	1814.92	1168.63		1439.44	7336.6	1172.85	3414.02	5202.2	1803.3	6138.44		13002.8	1153.82	11448.2	9264.98	10816.4	5396.33		14799.7	74632.8		4119.14	5071.77	11763.4	7419.24			4432.85			24256
A0A0J7JXL6	Dynein heavy chain axonemal-like protein	92021.9	2511.3	116978	2919.1	2838.06	76942.2	96390.4	29793.9	108716	2485.04	92834.4	79973.4	84525.2	90438.3	105825	12044.5	64412.7	66746.8	56308.8	14701.7		81627.8	63284.3	5164.89	64836.6	62093.4	65870.9				29085.7	35196.2			48027.9	51606.9
A0A0J7JXM9	Fatty acid synthase (Fragment)	1979.27												1402.54	648.806									1515.58
A0A0J7JXR7	Outer dense fiber protein 3-like protein	117930	3368.83	265801	13081.2	7047.2	79930.8	185424	103802	333509	6572.91	176866	37500.5	30559.7	78885.1	122371	23849	195327	106702	75810	87842.3	2612.24	47356.3	15801.9		108405	31032.1	126173	1118.54	1521.81		11276.4	124416		943278	32109.3	39924.2
A0A0J7JXY1	Elongation factor 1 delta (Fragment)	4264.28		11963.4	4851.88	6793.75	6089.95	4850.55	7825.37	4548.64	171.218	7515.61	3478.22	1599.61	3923.77	1550.9	7470.9	5605.68	6908.28	4031.01	10482.7		1438.24	2553.94	6062.58	2445.04	3523.48	8049.89				3755.88	9584.61			1263.86	3298.37
A0A0J7JY45	Unconventional myosin-xv isoform x1	1262.46		457.422			1236.47	738.547		1152.11		1161.27											968.042									1297.05	1555.93
A0A0J7JY65	Upstream activation factor subunit spp27-like protein	1383.83		2656.01			2821.1	924.643		452.708	252.516	1483.66	631.435		2964.55				1025.34				8078.57	833.814				4523.54								479.66
A0A0J7JY69	Cytochrome b-c1 complex subunit 8	9892.33		13848.9			8880.06	16717.9		18202.9	974.242	19974.2	13489.1	14154	21651	21173.1		8784.74	27321.7	8121.33	1380.37	2508.9	23339.2	13998.9	882.063	11924.9	23229.1	11820.1	1226.01			10296.9	34858.3			5610.81	13696.6
A0A0J7JYD8	Protein unc-84-like protein a protein (Fragment)			535.485
A0A0J7JYE5	Protein i m not dead yet-like protein	4979.66		37954	15990	22619.1	11968.5	4326.8	43885.9	10203		14669.4	1576.87	2605	4507.95	3167.65	29843.3	11294.2	7073.09	22275.9	15435.2		11036.3	4618.39	20918.6	9301.47	7739.58	6114.21				4990.38	4067.29			2503.99	6821.92
A0A0J7JYK1	Twitchin-like protein (Fragment)	3015.88					3861.52										934.725						4201.54
A0A0J7JYM3;A0A0J7K4I1	Cytochrome p450 9e2 (Fragment)	3403.65					1370.62					1989.99							955.28
A0A0J7JYN1	DBR1 domain-containing protein	864.826		3839.97			1144.61	1342.24		828.143		1060.03	856.9	1472.66	648.026	1683.74			1407.62		422.699		1118.32	1312.46				1427.2				2797.62				2480.42
A0A0J7JYP4	Stam-binding protein	3002.35		3142.24			1784.46	3767.08		2910.41		2752.31	2291.51	2895.5	1614.45	4072.3			2521.26				1765.51	1843.7				1276.03				2965.43	6928.95
A0A0J7JYR0	Inorganic diphosphatase (Fragment)	24842.4		27718.4	50474.9	58577.5	37025.7	28872.9	75852.3	26164.4		34390	23164	36275.4	27035.2	49482.2	84708.9	83182.8	21754.9	69608	77899	4150.16	50995.2	34613.8	85606.1	64914.1	63862.1	40010.2	1168.15		52633.2	74988.2	32193.1			183363	62199.3
A0A0J7JYY5	Fatty-acid amide hydrolase 2 (Fragment)	881.68		559.41							1595.34		1211.77		353.583				646.273				615.314						947.895			1109.93
A0A0J7JZ69	Wd repeat-containing protein 63-like protein	9120.82		1864.52			4459.68	5566.25		5006.4		1896.35	420.305	692.215	1731.6			1271.61	4024.25									1475.27					4981.75
A0A0J7JZ78	Neural-cadherin-like isoform x6 protein			138.632									720.978
A0A0J7JZ82	Late embryogenesis abundant protein D-34-like	5785.12		385.873			3839.27				982.318		7541.3	5699.86	4078.54	6627.16			2523.85				7737.91	7967.15			10285.7	10715.8	3080.38			6199.16	5633.78			7279.35
A0A0J7JZB9;A0A0J7KD13	Single-stranded DNA-binding protein			4066.22			282.533	601.42		686.733		407.275																					2043.81
A0A0J7JZE9	Protein i m not dead yet-like protein (Fragment)	44620.5		224376	130332	200535	96422.2	42972.3	401588	73824.2		118866	28312.3	43527.5	71053.8	45081.1	216527	169576	31798.6	193251	82782.1	3907.32	131424	73172.1	290563	112943	90212	88469.4			76343.9	31331.4	40268			67303.6	113742
A0A0J7JZF2	Rcc1 and btb domain-containing protein 1 (Fragment)	4661.28		854.229			3878.84	223.65	33233.7				5788.97	9250.23	4352.06	7203.49		25503.9	3206.07	29382.2	14956.7			11268.3				9544.42			53947.8	6781.07				9878.48	52832.3
A0A0J7JZN3	Nudix hydrolase 8-like protein	18041		38546	15019.3	16798.9	25036.2	17885.9	20969.2	18305.6	3350.83	15290.8	5941.52	10603.5	14233	11214.5	22985.8	19188.6	14743.6	16955.8	22566.9		9748.97	5284.71	15526.5	26630.2	17827.7	17639.4	663.31		10987.3	4526.38	8140.27			13344.5	15017.4
A0A0J7JZN8	Myotrophin-like isoform 2 protein			8959.98			284.502	707.241		200.671
A0A0J7JZQ6	Elongin-C	8396.65		10387.5			5999.75	8925.52		11016.2		8099.22	6338.57	2575.25	7894.3	1282.98		7254.87	11555.8	4892.86	1654.57		7890.58	1974.87		4937.03	2566.3	6567.82				6336.53	4706.36			1806.77	2445.59
A0A0J7JZZ8;A0A0J7KEL3;A0A0J7KLW6	Uncharacterized protein			326.805			1959.11	849.825	4076.08			1009.09	668.058		845.339	554.584		2470.94		3795.05				3454.14	3073.53			2797.02								3502.91
A0A0J7K081	Dynein heavy chain axonemal	29587.7		602586	1460.44		44878.8	54503.6	4909.72	32951.7		18801.8	23722	22144.6	48141.2	16495.9		24746.8	11158.9	17213.3	5499.59		17135.5	8350.16		18271.7		54846.6				2227.4	13591.6			4346.31	1484.17
A0A0J7K0B1	Proteasome activator complex subunit 4 (Fragment)			881.572			107.136	100.711
A0A0J7K0B4;A0A0J7KTG0	Actin-muscle-specific (Fragment)	95265.1	32321.5	15733	14288.9	12963.9	5774.74	1912.44	8641.73	2322.62	18651.9	6695.02	119811	5009.02	6223.73	19090.3	41359.4	9106.45	2488.3	27157.1	4554.45	110437	2081.7	5216.62	10491.5	130391	3489.18	19504.7	125998	21492.2	38666	7849.92	993.989	26189.8	171129	10314.6	21208.1
A0A0J7K0C4	Dynein heavy chain axonemal (Fragment)	17380		43363.8			15356.9	23455.1	4824.17	23481.4		16076.4	9790.12	12321.6	8873.51	8932.92		10539.8	18076.7	10533.7	2566.42		9299.57	2805.76		11515.6	5085.79	17386.3				7369.01	34036.2		59594.3	1499.04	9274.09
A0A0J7K0D6	Reverse transcriptase and recombinase		4060.77	810.308		1052.34	1604.62	624.105		692.694	1728.6	622.034			2851.69			1409.86	381.567	1400.79	1123.53		1301.15	3745.71	2677.83			882.758		2340.45
A0A0J7K0J3	Dynein heavy chain axonemal	37332.3		107543			23562	41232.6	2602.4	35332.4		20621.3	3623.95	1331.21	26501			20811.3	24168.3	8232.96			4031.23	3679.85				28940.6					8533.57
A0A0J7K0N2	Dynein heavy chain axonemal	11187.2		1336.38			6024.43	2432.19		6701.81		8593.44	8383.91	13788.4	8271.26	11857.5		9005.98	5587.25	9437.44	3133.76		9185.34	18018.4		13304.5	14150.3	15038			19949.7	10080.3	6596.76			23906.7	15940.8
A0A0J7K0P0	Structural maintenance of chromosomes protein 1a	725.533		690.475				181.479				1053.49	637.519					645.439	436.845				837.952									1162.92	877.204
A0A0J7K0Q4	Eukaryotic translation initiation factor 4b-like protein	2649.09	3576.43	3018.21			1919.7	922.745		522.359	7853.99	2560.77	4878.8	1620.43	2276.78	2674.13		2884.13	2813.56	7107.31	2328.42		5837.49	2370.42		1928.05	1942.12	2659.75	10479.5			6089.19		3391		1802.67
A0A0J7K0Q7	Retrovirus-related pol polyprotein from transposon tnt 1-94	7577.59	8325.33	320.459							604.679				313.659													6756.23				1312.96
A0A0J7K0U2	Heterogeneous nuclear ribonucleoprotein r-like isoform x18 protein	1923.95	3166.44	2833.58			1091.14	402.895		742.604	20980.1		1329.72		1642.18				1681.52		3546.82		5427.71	1740.34				1386.16	10201.3	1515.2			3459.49
A0A0J7K0U7	Ubiquitin-conjugating enzyme e2 n	1303.28	3803.52	1500.73			1059.31	417.352				3403.11	707.195						1463.66			2489.67						685.712				1531.49	1535.66
A0A0J7K0W7	Peptidase A2 domain-containing protein (Fragment)	1856.38		2417.01	2564.45	3537.1	3265.29	2602.72		4451.21	806.583	2364.64	3218.38	4104.59	3569.13	4991.57		4338.72	1507.48	4592.96			2655.81	3568.3	3252.52		3201.05	3706.54					1830.61			2281.91	5702.93
A0A0J7K0Z1	Dynein heavy chain axonemal	4012.21		8927.45			7109.91	6971.66	4688.26	4897.59		4249.11	6870.81	5899.58	7770.09	6140.9		4918.26	3183.87	7041.82			11273.2	8123.83		5638.27	7477.24	12905				4999.15	5931.61			6161.65	10397.1
A0A0J7K0Z7	Cell division protein (Fragment)	1119.19					952.102	711.972			1898.08		1197.96	1043.88	2019.17				443.633		1194.01	15325	764.555	1775.05			606.799	1190.3	1856.5							2451.31
A0A0J7K0Z9	Oleoyl-[acyl-carrier-protein] hydrolase	1574.51		1565.7				340.866					935.904	1808.45	626.05				565.309														1912.19
A0A0J7K113	Aromatic-l-amino-acid decarboxylase	1469.64		1106.13			943.718	997.49		1706.99		1884.93	1627.18	2468.88	1586.86	2412.56			1451.05									1406.67
A0A0J7K146	Cytochrome c oxidase subunit 4 isoform mitochondrial	16606.1	2457.22	436858			17067.8	44359.1		20257.3	423.563	4346.88			922.29				5561.92									1710.88					15575.1
A0A0J7K177	Cytochrome p450 4g44 (Fragment)	2781.77		3097.54							1287.58				453.762														648.112
A0A0J7K1D2	Mrna export factor-like protein	90.4092		1258.18			157.529	107.396				384.077	232.459						279.231									208.069					467.157
A0A0J7K1D7	Laminin-like protein epi-1 protein	1129.7		2033.94			3104.71	1109.2		813.442	918.712	1767.68	5031.96	1421.5	3344.76	859.893			2177.61	1906.69	1367.3	5559.34	1306.3	739.975				2813.97			7150.86	2601.98	1756.23			1309.23
A0A0J7K1E1	Proteasome subunit alpha type	33688.3	8251.79	21905.1	80706.3	86230.3	41434.1	36373.5	100469	32342.4	95290.4	33562.6	38614.1	46551.9	48436	51666.5	85815.4	71237.5	23747.4	71417.4	177460	13967	38491	34981.6	53745.5	68442.1	64169.6	60913	6783.67	4997.77	55052.3	47807.9	32376.7		57462.1	70158.2	63101.6
A0A0J7K1I3	Glycogen [starch] synthase (Fragment)	11004.1	4329.02	916.474			8495.09	1028.71	9567.67	754.517	6196.99	3106.37	11980.3	10121.7	15961.4	3414.75	3011.68	5634.43	7262.33	10309	5761.76	17247.6	4886.49	12055.2	1656.22	4638.84	6095.61	3966.45	12281.4	1747.05	6780.25	6130.71				5788.31
A0A0J7K1I5	Rac gtpase-activating protein 1	5030.2	2682.03	6522.99			27779	23376.7	16855.2	1906.18	7375.49	2356.01	15124.6	6677.83	33432.4	7490.48		22512.5	24625.9	6537.62	13254.3	4978.3	7109.05	43878.7		10892.4	7232.98	20493.8	4495.54		12227.9	53773.1	3430.41			11148.8	4730.61
A0A0J7K1L9	Dynein heavy chain axonemal-like protein	3921.95		2714.92			2081.71	2585.75		2634.84		2804	2747.61	2771.4	1910.07	4737.83	1108.16	2082.47	1829.13	2252.65			1337.52	4352.66		1298.34	4258.16	3604.63				3205.41	2554.25			3879.35
A0A0J7K1Q8	Dehydrogenase reductase sdr family member 4	19582.7		4855.9			14234.5	7182.03	4255.78	9387.75	2943.36	9523.18	14246.9	10881.9	17620.8	13559.6	1292.16	13502.1	6935.68	11871.9	1067.83	1927.53	14087.2	13496.9		7826.59	9748.18	10098.6	1817.86		11172.1	14254.9	4072.93			12537.9	16089.1
A0A0J7K1U2	Leucine-rich repeat-containing protein (Fragment)	1922.61		2614.58			2133.57	1926.21		2484.92		2629.1	1262.92	1528.71	3385.45	965.282		1236.55	2494.95	1416.77			2308.92				774.788	2539.16				1710.84	1545.49
A0A0J7K1Y2	Erlin-2	5930.96		5342.3	3430.12	4301.43	6962.28	4187.82	2382.79	7777.16	2896.27	5916.63	5172.44	4694.29	5472.51	6320.25	4330.96	8282.47	5012.62	7049.61	9401.05		5747.84	2930.44	3516.41	10088.6	2673.14	10415.2	992.94			6053.52	3203.58			3072.81	5789.19
A0A0J7K1Y9	Xanthine dehydrogenase	7844.48		12684.8			21512.5	10814.1	5772.98	7819.85	6743.93	16924.9	15089.2	6771.89	16096.8	4443.68		13593.4	15226.2	10928.9	6513.08	3775.97	28250.5	10532.2		13324.1	13648.6	9585.24	7589.96	8393.66		14883.6	15290.5			11090.7	5036.48
A0A0J7K201	Atp-binding cassette sub-family e member 1 (Fragment)	1719.02					509.969			472.199		1345.96	1035.04		1060.51				1275.63					695.18								1065.15
A0A0J7K208	Carboxylic ester hydrolase			2727.48											133.051				234.28														385.588
A0A0J7K215	CDP-diacylglycerol--glycerol-3-phosphate 3-phosphatidyltransferase	1394.4		5955.99			1106.18	1540.89		1478.53		949.411		1088.31	868.395	2730.63		1117.16	722.151							1667.22		1735.43
A0A0J7K2D5	Inositol-3-phosphate synthase 1-b	301.502		3081.36			589.535	278.448		665.221		1491.36	413.899		563.504			669.506	1369.05														1934.41
A0A0J7K2E7	Trafficking protein particle complex subunit 3-like protein (Fragment)	3202.76	9161.44	874.946	2068.5	3840.4	4641.06	1218.63	4844.85	1445.2		4127.26	6833.43	4687	5673.21	4453.07	4392.92	6788.64	4861.15	6505.41	5711.07	5649.02	10711.6	2986.01	3388.39	4851.94	5373.17	7755.25	4805.29	3787.35		5027.28	5547.79	4521.42		6303.47	5200.27
A0A0J7K2H2	Acyl-delta desaturase	327.13									2843.35		2991.48						501.599			1479.95							1037.09
A0A0J7K2I2	Vitellogenin-6	16533.9	12105.9	53100.5	2359.72	2534.47	73280.1	2450.75	43410.1	5279.43	35415.8	10042.7	131474	17161.6	95714.2	2990.67	10782.4	13079.9	123442	53899.8	35603.4	67060.4	4808.64	30415.9	7498.04	8095.65	1242.24	8826.38	12048	6251.76	26514.7	112689	21728.2	1487.29		9913.41	7432.98
A0A0J7K2I5	Glutathione s-transferase (Fragment)	23682	15222.6	9664.07	2320.32	3488.08	27542.5	6396.88	18271.4	3752.63	14867.1	16806.4	41305.5	8681.07	45331.5	14084.6	4478.42	8500.11	24110.4	13068.4	9008.3	9089	23364.6	45852.4	4375.28		8461.76	8531.51	11681.4			16232.5	8098	4534.4		25944.3
A0A0J7K2I6	Protein lethal essential for life-like protein	8367.91		17674.9	16606	29106.8	19704.8	10324.2	32396.2	14092.4	1358.87	15743	7069.03	8914.15	11058.3	9236.33	22117.1	13945.7	11093.5	18112.7	45753.5	4027.84	10576.4	3743.32	17967.7	12122.4	9576.43	8775.71			28401.8	10899.7	8469.48			7015.02	11109.9
A0A0J7K2J8	Peroxisomal acyl-coenzyme a oxidase 3	296.91		1227.87			363.578	253.285		401.477		714.176			299.466				698.332																	997.554
A0A0J7K2K3	Uroporphyrinogen decarboxylase	8744.09		4837.92	4927.4	11105.1	22933	21851.9	8097.65	15814	16510.2	27291.6	10870	8059.87	8842.8	4432.5	9433.96	12983.4	17179	17205.8	13516.2		8421.74	4925.47	13077.6	7472.88	6626.79	14479.2	5580.6			14808.6	36763.1
A0A0J7K2N4	Hira-interacting protein 3	258.917		565.835			380.782						307.878						478.682				340.156
A0A0J7K2S5;A0A0J7K3A5;A0A0J7K6U2	Reverse transcriptase domain-containing protein (Fragment)	3841.9	33726.4	1818.06	16831.9	16829.8	6243.4	1959.56		7382.05	11216.6	2718.58	4149.37	2795.75	4020.74	5004.48		18672		21448.8	12482	18666.1	9803.69	5796.65	23860.1	111558				26141.4						3418.68	22460.2
A0A0J7K2U6	15-hydroxyprostaglandin dehydrogenase (Fragment)	13327.5	2485.62	30138	2109.22	4246.89	17023.7	4601.91	23745.9	1043.95	9760.86	4600.03	20213.7	13386.7	26074.6	7910.9	6076.88	13006	7509.72	19393.1	9431.32	10361.3	19987.5	26062.6	1995.73	10424.2	15938.9	11978.7	31425.3	24455.3	28755	8458.8	5328.29	14584.6		45817	17008.1
A0A0J7K2W8	Ubiquitin thioesterase OTU1	1332.96		3985.99			1868.46	511.308		1247.66		4170.24			844.65				984.173														3244.69
A0A0J7K2Y2	Fumarate hydratase	202849	48056.3	202701	18544.6	20764.3	151267	224317	124374	223090	13641.3	185519	213973	204176	252440	325770	43522.5	215996	208979	148207	55850.9	13868.2	190751	122702	18282	259403	225378	250106	5934.56	12017	77641.2	194324	244913	90461.3	712972	144484	146937
A0A0J7K329	Tho complex subunit 4-like protein (Fragment)	1663.23					661.398	349.268				1202.17	937.493		712.49		1732.64		1338.99				1963.92									1128.46
A0A0J7K345	Leucine-rich repeat-containing protein (Fragment)	1859.38	6656.05	4642.16	12100.3		2544.74	1258.18		1865.55		2033.77	2979.54	3477.08	4172.66	3726.28		2502.88	2934.04	3390.62	386.613		4382.15	1559.45		3260.82	2723.37	3593.74				3184.91	2807.61				5464
A0A0J7K353	Glucose dehydrogenase	8086.08	81325.1	39881.1	11700.2	19510.8	6919.15	4198.11	11692.7	2571.79	146990	5467.19	7217.65	4253.81	3692.07	8331.39	12074.4	10204.1	6667.53	28622.2	27788.8	16253.4	7224.75	15125.8	21057.1	3022.2		2231.48	38907.6	16774.6		2592.75	6391.87			4891.91
A0A0J7K367	Insulin-degrading enzyme (Fragment)	10261		7230.33	27528.9	19945.3	13530.5	15004.9	19222.2	11483.2	2405.53	13656.7	19927.5	24711.4	17792.6	33001	36102.8	29516.6	7687.64	41277.4	32090.9	5340.33	29940.7	35891.3	30426.2	25927.5	25463.3	24614.8	981.158		30395.3	5303.12	19964.7			33653.7	43690.3
A0A0J7K3A1	Proteasome subunit alpha type	12929	9198.03	21963.6	9091.21	9404.82	11297	15540.2	8551.96	17201.4	9109.14	21430.1	7580.91	4758.59	10285.3	7970.15	7017.15	13017.4	21305.2	8341.02	16834.8	7584.63	4838.07	6395.6	7210.34	10731.6	6632.25	10967	4077.16			11105.4	72609.5			59384.4
A0A0J7K3H2	Ras-related protein ral-a isoform x5	2148.86		2035.03	3977.7	5837.31	1900.25	2139.63		1962.19	6238.11	2686.48	2857.34	2992.97	3226.71	5046.43	7359.01	3017.45	1876.4	3451.18	4588.16		3289.52	4261.16	6427.56	4226.64	5290.3	2660.16	4520.99	8710.7		5497.1	699.618	2071.61		14751.8	4687.22
A0A0J7K3J4	Dehydrogenase reductase sdr family member 4	3566.56					2629.02	685.239	1630.62	1869.99		1199.77	1412.08	944.549	3001.54	1507.92		3972.25	1681.32	3255.53			3428.24	2144.83			1126.65	2641.11			3333.15	1216.85					5101.94
A0A0J7K3L2	Hsp70-binding protein 1-like protein	3847.21		9534.86	10982	14658.6	4921.39	3920.8	12130.6	5481.25		6969.78	1966.1	4990.31	2119.66	5605.42	12659.5	8202.2	3561.71	13980.2	9002.73			5416.84	9828.7	7703.31	3381.83	3848.59				5131.79	5437.72		18051.1	1356.55	6139.04
A0A0J7K3P2	Fatty acid synthase (Fragment)	1421.85					336.562						575.136	1046.69	1291.28				554.028				651.563	1089.28
A0A0J7K3Q2	Reverse transcriptase	21767.9		976.267			9393.09		5512.73	16831.6		16766.8	30922.4	32736.2	22697.1	53518.1	3323.6	19531.9	10045.2	21825.1	2847.4		32415.5	19819.9		25540.8	24896.2	23063.5				13706	10408.4			14003	46338.5
A0A0J7K3U4;A0A0J7K426	Cytochrome p450 9e2 (Fragment)	1468.66		549.401			470.954	517.369		205.41		1026.63	447.897						1353.58				894.587					554.196					639.553
A0A0J7K3W3	60S ribosomal protein L36	10405.5	5576.38	7721.76		2107.93	12368.7	3016.34	5713.23	3074.85	4929.77	8809.23	4865.63	4091.86	6691.29	1028.48		4681.55	11944.7	4675.65	1975.64	11231.8	18143.2	5250.76		6915.4	4151.35	7045.15	3438.6		17552.3	8445.61	6910.62			4039.95
A0A0J7K3X4	Coiled-coil domain-containing protein 13			1564.04				708.119		542.516			372.881		369.905								1349.25									1262.83
A0A0J7K3Z0	Pyruvate kinase	1321.37		732.384			319.96		2411.38		2118.93	628.504	1756.66	820.602	543.773	597.242			1277.65		1200.29	3254.18		1360.98					1309.45			1289.49				2220.07
A0A0J7K3Z7	Dynein heavy chain axonemal-like protein (Fragment)	5484.52		6011.3			4774.29	3309.58		4718.96		4898.64	4838.71	8631.6	4102.21	4727.95		7613.66	3296.28	6854.16			7495.02	4803.05		6806.37	7567.9	8143.1				5179.66	6353.52			5420.63	11378.3
A0A0J7K415	V-type proton ATPase subunit a	7500.83		20126.3	9564.36	11287.5	6341.25	7410.7	10276.9	7040.32	1489.07	7536.79	5434.46	10481.4	5312.3	11790.6	9720.76	9895.49	10343.4	11962.9	9065.05		5778.38	1773.51	11415	9388.29	11375.2	6428.61	1498.07		5722.93	30083.7	14306			4256.28	9224.07
A0A0J7K433	Adp-ribosylation factor-like protein 8b-a-like protein	1841.57		24393.1	4967.9		1558.99	2798.72	5715.98			1101.52	1639.77	1390.56	2180.82	1302.01		2789.04	10393.5	3508.69	1833.83		2429.16	1961.34			3076.49	3878.88								1800.41
A0A0J7K482	Chloride channel CLIC-like protein 1	31745.6		193076			30787.5	47590.6	4499.16	52803.9		20996.9			3774.27			2254.59	21180.3									2547.98					54087
A0A0J7K484	Hypoxia up-regulated protein 1	1078.95		1602.94			1881.65	690.046		1574.58	2574.86	1437.48	2396.07	1125.15	1505.72	1814.73		1684.52	1440.53	2007.71	2317.62			1599.13		2870.22	1102.53	1500.63				1788.12				2325.3
A0A0J7K4B8	Putative cytochrome p450 12a5	2427.97		11918.3			1943.57	4411.76		4480.57		1761.02			721.025				1246.12														3490.65
A0A0J7K4C5	26s protease regulatory subunit 6b	5125.55	5759.91	4163.41	9317.31	9409.3	4903.87	4800.9	13666	6644.35	1585.99	6178.01	2814.61	3406.59	4671.88	4573.04	9735.19	6897.15	5314.51	8865.54	14125.7	13079.9	5098.75	2724.86	9094.1	11752.1	6727.51	4789.42	1513.79	13680.6	19541	4642.02	3120.16			5473.84	7211.46
A0A0J7K4D6	Dynein heavy chain axonemal-like protein	673.35		4431.15			731.182	640.893		516.857									351.586
A0A0J7K4H6	Dihydropyrimidinase-like isoform 2 protein	2528.94		1237.23			2499.59	1028.82			3503.11	2549.6	1659.48	2886.91	3311.2	3102.17			1290.08			7931.24	4387.94	2563.57		16345.4		3365.93	2724.42							8001.33	21214.3
A0A0J7K4Q8	Fatty acid synthase	764.359									599.278								431.351			1449.4
A0A0J7K4U0	Bee-milk protein	2065.86																	2265.57			6062.2											4375.35
A0A0J7K4U3	Cop9 signalosome complex subunit 2															6349.17				18266.5			4054.61			23839.9		5809.6	14777.3	15942.5							17098.4
A0A0J7K4V2	Fggy carbohydrate kinase domain-containing protein (Fragment)	11890.7		15499.1	2341.95	8313.43	22031.3	7973.2	22365.6	1461.59	6115.88	9206.49	31381.5	23686.8	23144.6	14208.6	6460.62	11790.1	15166.6	13399	8985.2	8049.55	16647.3	17155	3999.89	8825.16	20417.3	12931.5	4503.52		27897.8	16484.8	7653.49			13392.6	10421.9
A0A0J7K521	Ubiquitin carboxyl-terminal hydrolase 7	2419.28		4087.53	3430.54	3872	2796.73	1752.4	14145.1	2216.87		4693.33	2347.72	2934.93	2232.83	2862.9	4179.36	4087.08	3678.5	4388.52	3377.61		3204.54	2405.8	4320.44	4135.17	2599.28	2946.14				4882.72	5306.9			5831.26	3942.08
A0A0J7K535	Sorting nexin-16	1068.49		3204.94				507.023		1025.64		850.424							654.907								631.224
A0A0J7K548	Atp synthase subunit mitochondrial	818.388		1030.69			2203.45	2953.67		1775.92		2055.04	1053.36		3304.31		2524.48		782.911		1688.86	1653.27		3358.52	1429.12		4395.36	1647.15					711.845
A0A0J7K549	Serine protease						7169.5				1466.65																			4385.62
A0A0J7K560	Tetratricopeptide repeat protein 1-like protein (Fragment)	969.328		644.631			804.261	430.351		724.325		1356.12	805.636		518.465			1030.05	657.329		2037.22		1525.34					889.702
A0A0J7K565	Protein scarlet-like protein	1127.8					2073				3195.49		634.415	506.911	3483.12	2352.46			2139.84	5501.52		9906.12		3482.41			2491.39		3295.23			7269.08	2913.19			6340.91	30340.7
A0A0J7K569	CDP-diacylglycerol--glycerol-3-phosphate 3-phosphatidyltransferase (Fragment)	629.579		3520.77			380.557	551.971		584.233		417.458	384.447	401.151	345.155				379.665									720.414				621.026	1645.91
A0A0J7K579	Thioredoxin domain-containing protein 4	867.487		3967.58	1476.21	1699.83	1265.05	774.327		1169.97		1584.04	1207.14		1083.64	847.834	3388.6	2785.52	1697.99	2325.1	2742.94		1283.73	1761.31			681.97	1480.46				2188.95	2522.39
A0A0J7K5A3	Cathepsin l-like protein (Fragment)	1386.24	2856.17	5125.31			6525.25	668.919		320.675	35943.8	804.62	6719.58	5199.57	5886.82	2866.48		1598.29	5402.06	4086	990.16		1911.62	6650.02				1917.46	2843.72			2803.97	4228.56			9054.97
A0A0J7K5D1	Reverse transcriptase						2624.53								1287.32	3053.76		14173.9		13511.1	4435.1					18152.6		5372.23
A0A0J7K5D7	Bee-milk protein (Fragment)																															8097.53
A0A0J7K5E2	Pdz and lim domain protein zasp (Fragment)	4438.99					559.414				636.253		518.164									6534.81						1208.45	2235.58
A0A0J7K5F7	Dentin sialophosphoprotein (Fragment)		4412.74		12190.3		760.93			427.684	15152.5		670.136		596.681	308.397		1859.34		1493.93	1029.98	6093.68	2402.49		1146.59			11389	9705.41	3897.9		1783.39		1238.23
A0A0J7K5H4	MYND-type domain-containing protein			6685.46				1032.07							421.076				551.068
A0A0J7K5H8	Programmed cell death 6-interacting protein	18173.4	3258.22	20439.5	15920	18262.6	23533.9	10568.9	24404	13858.4	17300.8	24168.8	22143.4	10003.7	20564.4	8828.24	23973.9	24250.8	21663.8	22058.2	24487.7	10406.9	24016.4	9901.95	25858.1	18855.4	17277.4	20335.7	24273.4	27517.5	14694.7	28715.6	8613.62	9615.68		14880.1	11805.3
A0A0J7K5M0	Actin-related protein 2	1373.5		832.28			896.361	417.908				1280.91	2076.49	924.623	1182.91				1263.07				825.122	866.594								1839.76	1343.99			810.706
A0A0J7K5N6	Glutamate--cysteine ligase	765.259		1404.19	1845.59		1286.86	459.413	10895.3	563.406		1043.95	1324.23	1698.08	985.178	4821.81			919.578	1593.16	2143.33	7587.38	2255.16	1573.98			2988	2004.11			6322.31	738.403	2679.72			2240.3
A0A0J7K5R2	Proliferating cell nuclear antigen	2350.41		1657.12		709.376	1478.84	463.063		1152.33		1869.84	1771.78	2494.39	1188.28	1554.71	1903.1	1980.79	1854.95	16375.2	980.39		1765.91	549.171			932.01	1848.27				4032.64
A0A0J7K5R7	Cad protein (Fragment)											355.305							454.273
A0A0J7K5T7	Glycogen debranching enzyme (Fragment)	17044.9	4245.25	28109.8			17176.7	4281.87	9309.92	2307.75	9976.54	13179.4	17939.1	10003.4	12951	3756.62	2764.57	8107.71	30493.8	12039.6	4588.77	4801.25	8875.18	4093.18	2197.97	6534.95	9315.87	10237.9	7211.24			15085.8	17962.2			1988.63	6695.9
A0A0J7K5U5	Peptidyl-prolyl cis-trans isomerase	8549.24		18606.6	3273.99	3910.72	9030.32	24861.5	7576.88	15332		7252.99	13310.5	9415.98	11100.5	8830.01	6639.9	2818.35	12089.7	4610.8	5876.94		8379.57	2235	5211.33	6555.35	3052.33	12997.3	517.214		142671	6366.69	5769.41	143167		2557.94	4257.26
A0A0J7K5V9	Cgmp-dependent 3-cyclic phosphodiesterase-like protein	1153.46		684.128			1010.62	639.779		683.833					250.598				336.43
A0A0J7K5X1	Lambda-crystallin-like protein	13640.6	8582.58	13417.4	10799.5	17064	18056.8	14571.9	27695.4	8831.18	45563.8	15351.8	15618.7	15602.3	12473.5	13469.6	8091.69	25446.8	16930.6	31988.4	28373	6678.46	11088.2	23710.8	10490.6	26089.5	23536	15052.5	9125.97	13113.8	14566.7	21777.4	16464.3	11010.3		46125.5	23777.8
A0A0J7K5Z5	40s ribosomal protein s10	8616.89	15051.7	5817.45	2722.61	1622.95	14336	2731.05		3437.98	43162.6	6577.86	21492.9	7186.48	11221.3	3129.31	2556.9	14044.1	5947.91	12161.2	11860	6270.79	4565.26	6955.28	5180.19	7644.32	4427.58	8003.21	67500.9	9399.01	14455.7	7113.36	3554.19	9660.29		9562.2	13249
A0A0J7K611	Long-chain-fatty-acid--ligase acsbg2	2388.05					616.48	457.053			2358.04	854.6	2316.35			868.866			1094.1	1663.9							667.048		1651.51			1609.55	2855.8
A0A0J7K618	Adenylosuccinate lyase (Fragment)	1604.97		1535.75	2060.3	2493.08	1303.11	1133.8	4484.62	1211.9		2114.5	3005.04	2161.57	1600.5	2072.59		1541.06	1395.58	1993.76	2313.31		1739.07	3358.39		3620.92	2374.66	1243.34				1653.55	2157.58			7091.62	3229.06
A0A0J7K666	Spermine oxidase-like protein	192805	15070.5	132419	3222.38	3308.35	99584.4	152278	30204.5	233515	5734.48	247735	79381.2	69819.8	115851	127405	8955.38	93399.7	195075	86471.6	4198.9		124318	99941.8	7604.8	71371.3	95683.4	66623			29729.3	140022	330647			175940	57069.1
A0A0J7K683	START domain-containing protein	870.794									557.638	333.821	635.462
A0A0J7K699	Inosine-5'-monophosphate dehydrogenase (Fragment)	1596.1		1067.61		1591.25	2018.77	1762.81	8712.76	2791.83		2386.48	1566.32	1692.91	2767.86	1512.19	3937.39	1963.94	1810.52		5430		1743.04	995.963	5302.42	6303.84	2188.44	1868.87	1041.9				11642			1400.55
A0A0J7K6A0	N-sulfoglucosamine sulfohydrolase-like protein	6503.21		3599.31			4032.22	3103.65	937.711	2187.82	27520.4	3086.47	4806.04	2739.94	2370.3	4980.85		2686.8	4203.37	4628.35	3779.47		1053.67	1716.37		2204.61	3961.79	2037.13				7730.39	2875.81			888.157	3094.63
A0A0J7K6D5	Structural protein			453.722				187.479		381.672
A0A0J7K6E1	Dynein beta ciliary	31267.2		53281.4			24981.2	35155.6	13172.1	35382.4	1784.99	37110.1	19242.9	16795.3	26854.1	8312.59		18449.4	32866.8	23696.3	6400.54		25728.3	15783.1		20583.9	23971.6	26044.1				17543.1	29026.6			14403.4	15732.9
A0A0J7K6M9	Beta-galactosidase-like isoform x1 protein	1632.06		6916.14		4040.26	1411.76	1838.15	10356.8	2557.44	47052.4	1470.86	1863.48	792.38	1082	1990.69		2883.35	3102.47	8310.63	9223.56	19705.3	3027.62	2414.35			8076.64		3290.23	4678.55		8319.76	4402.29			1008.45
A0A0J7K6N7	Oleoyl-[acyl-carrier-protein] hydrolase (Fragment)	14133.5	14958.6	3296.13	3639.19	4889.54	2779.69	526.89	20693.8	245.797	29690.7	2411.54	33249.3	8946.77	6990.84	17878.5	5949.74	4548.87	5928.49	22560.2	14774	58356.4	2505.99	9173.8	8198.08	3229.57	2576.66	3147.01	24189.4	15789.4		5798.62	5424.11	14007.7		6276.67
A0A0J7K6R7	Cytosolic purine 5-nucleotidase-like protein (Fragment)	1136.02		2720.45			1467.72	430.6			2258.3	797.308	2301.08	1295.19	2223.87	812.157		586.072	1400.51	3739.12	1678.3	4268.57	1562.68	4536.14						2934.42		1750.34	3623.82			6182.04
A0A0J7K6S3	Dynein beta ciliary	89942.2		119865		3059	60492	89382.4	32478.6	93309.2		92393.1	80381.8	118720	75089.2	178095	8021.02	53486.8	91627.3	47143	7710.18		84924.5	57743.8	3633.24	65188.8	84060.4	57353.7			31257.4	95973.3	75121.2		95242	70049.5	114340
A0A0J7K6T0;A0A0J7KNR4	Fatty acid synthase	9033.2		17824.9			8411.4	3538.81		1112.06						18204.9		6728.85									13525.7	11503				6416.95	3061.75			7009.07
A0A0J7K6W0	VWFC domain-containing protein (Fragment)							659.035			3562.48																		1041.67	1547.2
A0A0J7K6X1	Triokinase/FMN cyclase	700.355					956.518	99.8233				401.771	1812.13		781.105	1094.22			1088.5				1977.24				1639.6					2585.33
A0A0J7K6X4	Alpha-L-fucosidase	1703.19	3744.1	8972.09			7065.83	1695.08		1693.38	17016.2	2558.87	640.084		949.602			2705.11	3193.05								1916.25		3745.99	10488.9		922.042	4131.94	5493.84		2990.49
A0A0J7K6Z1	Glutaredoxin-related protein 5	2503.38		3226.76			2984.58	1938.61		1865.72	1582.93	1835.15	2574.14	5018.22	3909.86	2165.18		3748.67	1496.79	4875.34	2374.11		3644.41	6880.98		4444.56	4593.05	6887.73				2280.05	1907.94			7250.08	7323.41
A0A0J7K700	Exportin-2-like protein	2826.31		6251.91	6271.1	7075.6	3308.17	1188.64	11257.8	1846.18	1216.86	3664.31	3374.93	5322.23	3404.34	5248.48	8152.93	5958.98	2860.82	6812.93	4419.08	13582.9	5528.49	2019.7	7091.56	4660.59	6635.81	3114.91				4230.66	4578.71			4327.08	6065.32
A0A0J7K720	Alpha-tocopherol transfer protein (Fragment)			4888.45			904.139					3925.84			907.367				7064.64
A0A0J7K735	Prefoldin subunit 1	1077.61		2208.04			643.671	482.612		600.57		1299.8	512.202						1220.93														2302.27			1883.5
A0A0J7K755	Rab gtpase-activating protein 1			12045			4988.71	5653.49					3218.23	2853.26	4750.66	2883.58			4943.66	2313.41			3664.03	1648.23			3215.21	5318.47				5810.38	11176.4				2668.64
A0A0J7K766	Phosphoenolpyruvate carboxykinase (GTP)	1826.05		5418.14								1672.64	2168.2		2227.06				2035.45	2195.46			3824.04		622.105		879.76						2655.91
A0A0J7K775	Luciferin 4-monooxygenase	1272.6		2092.53			684.162	321.886				890.61	1503.3	597.005	1125.1	632.088			1482.75				1985.73				406.16					1025.49
A0A0J7K779	Cytochrome p450 9e2	1619.43		1234.28	7044.19		646.119	306.115				1046.5	1776.92		609.494				1188.43													766.59
A0A0J7K784	2-oxoglutarate dehydrogenase e1 mitochondrial	3920	6255.88	4055.48			3172.51	2463.02		2301.86	4887.47	5155.1	3954.14	2691.78	3507.02	2473.86		2157.44	5995.46	4244.04	1310.29		3530.44	4166.34	922.753	2373.76	2573.96	3220.44	4868.82			4350.56	13162.9			1132.63
A0A0J7K786	Odorant-binding protein a10			5715.67			243.453	345.536		60.7824	1031.02		218.899						92.5814									744.928	369.201
A0A0J7K7A1	Tho complex subunit 6-like protein			1629.64			646.882	599.183				1010.78			660.963
A0A0J7K7A2	Uncharacterized protein	40476.9		16165.9	4095.41	6156.71	50874.5	15442.2	41377.6	30145.6		46738	58945.9	80605.7	43655.1	64809.3	5224.45	69010.8	27400.2	110854	30826.4		47338.9	59013.3	8620.44	35944.8	91374.1	99738	615.89		24116	96172.6	61500		640894	92395	237722
A0A0J7K7G1	60S ribosomal protein L28	3025.33	3990.95	983.533			2305.16	973.698		1133.11	2627.55	1506.34	3446.32	2339.56	3093.18	1825.43		1649.58	1932.43	2646.88	4209.31	4168.57	3662.44	2490.78			3525.53	2284.42	2101.81			3124.87				3263.75
A0A0J7K7H8;A0A0J7N8J1	Protein lethal essential for life-like protein	8858.38		8874.25	6823.32	11639.2	10627	9282.07	20395.5	12055.3		16798.3	5793.1	11145.2	12723.1	18320.1	22266.9	11873.4	5573.25	8124.29	62176.5		11766.5	20825.3	14058	10578.7	13159.4	4218.68			11992.7	7446.53	3479.98			19385.1	10845.4
A0A0J7K7K3	Coiled-coil and c2 domain-containing protein 1-like protein (Fragment)	1838.43		7024.31	2225.65	2047.28	3465.01	1301.59	3839.71	1786.17	1533.38	2199.2	1778.35		1637.36		4314.59	4048.06	2094.4	3543.14	2335.76		2725.6		2790.89	3079.12		2974.02				1577.63	2296.88			1824.26
A0A0J7K7K5;A0A0J7K816	Ig-like domain-containing protein			446.069				340.257			17982.4										1114.67								1218.57	2409.28
A0A0J7K7N4	Multifunctional methyltransferase subunit TRM112-like protein	2454.67		11478.5	3179.42	3505.42	2763.5	1095.01	3171.46	2763.06		2852.67	2935.69	1679.02	4713.25	3252.63	4092.27		1321.44	3812.84	4646.52	3890.7	4429.51		5670.85	4080.55	2574.9	3057.19				1401.38	1967.71				1825.4
A0A0J7K7P7	Peptidyl-prolyl cis-trans isomerase	449.206		694.377				148.185											207.547
A0A0J7K7Q7	Vesicle-fusing ATPase (Fragment)	50096.8	42250.7	48245.9	32182.8	38314.5	46007.5	18927.6	41639.5	41354.4	15540.9	56156.6	51704	37310.4	34112	44065.4	48481.2	57700.1	35829.3	45034.7	47944	20174.7	36172.6	21351.7	42413.8	56462.4	45447.7	28823.1	19923.6	8705.31	53712.8	44766.1	39287.9	13861.5		32388.5	28343.4
A0A0J7K7R5	Transmembrane protein 65 (Fragment)	674.224		874.742			320.171	320.785							427.446				365.857
A0A0J7K7S2	Signal transducing adapter molecule 1-like protein	1851.86		5179.86		2876.01	5012.18	1987.07	5717.94	9007.31		6261.42			1915.72			6226.93	4457.66	3511.59	3502.71				7022.1			2927.35					9785.02
A0A0J7K7S3	Glycosyltransferase	850.003		514.741			534.877	433.589				1375.2	1435.62	339.301	633.848	306.814			708.466					604.194				645.537				2621.38				440.588
A0A0J7K7W6	Vacuolar protein sorting-associated protein 53-like protein (Fragment)	474.103		880.754				198.197				633.47	391.444						453.967													1063.27
A0A0J7K7Z5	Proteasome subunit beta type-2-like protein	1843.56		12771.8	11541.6	17297.6	2222.1	4522.19	12636.2	2794.81	8303.2	4109.36	4951.7	5081.53	2488.14		14098.7	13237.8	2713.38	18545.1	21083.8	14880.4	8138.01	10394.5	16692.7	14229.2	26482.5	7642.75			28788.8	6122.74	6771.01			24347.8	10511.7
A0A0J7K820	RuvB-like helicase (Fragment)	6500.6	6522.82	7075.7	11397	13174.9	6429.34	6868.4	12231.4	7348.07	2702.86	11838.5	5637.03	4780.99	6585.68	6764.17	17942.9	14941	5586.79	12142	14888	11854.2	8587.9	3576.95	12564.4	12084	7418.38	7032.27		4703.95	14118.6	12963	8755.84	28098.4		5994.14	9786.34
A0A0J7K823	Echinoderm microtubule-associated 2	2047.65		1693.47			2157.73	1500.95		1158.04		2192.88	3102.26	795.401	3567.72	1016.74		2813.14	1949.35	1668.35			9391.86	1562.9		1187.39	2152.62	2724.79				1168.68	1375.73			2704.98
A0A0J7K830	Dynein heavy chain axonemal-like protein	1895.01		2346.59			714.426	1009.69		1261.75		527.383	1499.91	1517.48	1153.32	3043.77		2147.79	1198.63				1582.48	3607.78			1520.75	1366.1				2387.47	6920.7			4183.66
A0A0J7K837	Heterogeneous nuclear ribonucleoprotein u-like protein 1 protein	520.511		1773.3			434.79	194.128		324.133		507.908	642.328	640.95	206.356			811.54	806.788									359.252				707.883	642.56
A0A0J7K846	Transmembrane emp24 domain-containing protein eca-like protein	722.915					624.75	252.737		584.916		928.945	713.697		785.424				1711.42													1394.75
A0A0J7K850	Serpin-like protein	840.655		2206.68			1627.44					4314.15	3321.9	940.072	2383.95	1063.33			869.404		1958.61	7612.43		5339.53				845.878			6662.62					288.469
A0A0J7K869	Endo/exonuclease/phosphatase domain-containing protein	6106.39		617.733			4799.05	3845.17		4613.77		4857.76	5064.28	11823.4	7099.34	6953.21		11084.7	3008.53	9444.43			9196.6	12641.7		14079.9	13783.5	15755.2				3822.04	6752.33			10815.8	19280.9
A0A0J7K884	Mitochondrial thiamine pyrophosphate carrier-like protein	989.185		6783.91			762.621	1527.76		1216.28		1264.03			660.551				1925.83	1488.52				755.374				1098				1801.23	6651.39
A0A0J7K887	Maleylacetoacetate isomerase			3475.99						1008.21									1579.58
A0A0J7K8A6	Ubiquitin-conjugating enzyme e2 o	988.371			1442.87	3891.98	733.531	517.541	2267.95	1109.77		1273.05	1288.04	1050	581.73	1643.34		1469.16	653.451	1394.48	3029.88		2312.33		2887.78	1592.97	1157.33	1119.17				700.121				582.744
A0A0J7K8F8;A0A0J7KSM0;A0A0J7KSP7	Histone H2B	74874.6	609343	71033.8	82555.1	41414	36448.2	64724	64714.7	52242.5	341939	61018.7	72938.8	54247.4	64997.6	48568.1	52117.4	94464	64262.4	157287	28991.5	34890.9	77850.5	26729.6	18957	120756	108602	75931.6	59112.7	26104.1	25809.9	72431.1	59594.3	24635.8		17619.6	41260.2
A0A0J7K8H9	Voltage-dependent anion-selective channel-like protein	86439.5	10034.9	115943	8064.51	7270.49	89947.1	117529	22417.9	144343	7546.21	98412.7	101290	120986	102235	116960	11826.2	57683.8	100449	61878.7	13954.3	5693.88	73892.8	68602.5	11332.5	53935.4	78248.7	76414.4			43135.5	68656.4	72717.8		4494720	171584	64280.6
A0A0J7K8K5	Protein transport protein SEC23	638.262		1618.24			409.683	152.538					593.54		464.982				776.576								762.075						545.967
A0A0J7K8K7	Prostaglandin reductase 1	34485.1	12477.2	26877.2	9025.73	4608.74	50531.7	17343.4	55039.4	2021.56	8649.5	10255.1	104308	74692.1	119992	14814.2	8585.37	28355.2	24271.5	37052.8	23114.6	11212.7	38546.1	103376	13404.7	26908.8	49292.8	21486.1	7284.82		218167	25300.8	30439.8			46792.5	19387.2
A0A0J7K8K8	Rna-binding single-stranded-interacting protein 1 (Fragment)	1338.01					1113.06					1806.36	1761.56	129.054	830.195			257.112	1677.75				2299.5					1299.6				1443.79	473.425
A0A0J7K8L1;A0A0J7KT64	Histone H3	19426.3	164983	1874.26	20401.3	11270.1	2491.06	2406.36	7630.51	1937.75	27646.5	6975.54	7576.33	1954.9	3469.69	9481.3	90600.5	14898.7	3715.56	18692.5	2134.98	6720.36	6592.77	23690.7	11192.6	34979.6	1681.11	11873.3	9895.94	14984.4	49511.9			9718.49		25161.1	14979.2
A0A0J7K8L2	28 kDa heat-and acid-stable phosphoprotein	1769.74	1568.97	11836.1	4860.91	3214.84	2241.29	860.564	4745.68	556.702	2797.11	831.868	1486.47	1122.92	965.11	643.215	3747.77	1369.09	3387.21	3525.74	2331.18		2441.28		3111.1			2542.85	5633.58		1339.67	943.186	2505.44
A0A0J7K8M1	Retroelement polyprotein (Fragment)	2425.99		2449.95			1139.47	1994.35		3337.69		3524.3			789.318				2791.1		1007.8
A0A0J7K8M2	Putative serine threonine-protein kinase pelle	1904.59					1255.16	1485.17		1222.49		1161.43	2162.07	1331.32	1309.19	3371.14	4354.3		896.937	2562.25			1508.58	4002.32			1815.64					1303.64				3654.95
A0A0J7K8N4	Epidermal growth factor receptor substrate 15-like 1 protein						465.334				1563.84		514.271										760.761													2808.48
A0A0J7K8P0	Breakpoint cluster region protein	607.942		894.422			634.206	285.618		637.432		811.948	929.786		923.279	1475.02			598.43			3041.71	2624.71				969.381	461.386				1240.22
A0A0J7K8P2	Transposase							164.004		155.194									160.778
A0A0J7K8R1	RNA-directed DNA polymerase			5650.2				2890.46		2517.6		1811.3											2658.25
A0A0J7K8V0	Myosin heavy muscle (Fragment)	44158.1	12022.1	3023.09	5340.78	5674.99	3556.24				7419.34	10453.3	38544.8	3183.2		4608.15	9522.93	4263.33	2639.01	10284.8	2087.78	33972.4		975.64	5586.55	30714.9		6721.87	12596.9	7872.62	25729			8775.11	279394	2198.46	7776.92
A0A0J7K8V1	Protein transport protein sec61 subunit alpha isoform 2	2233.02		621.315	2634.02		1274.41	574.324			4279.24	2657.81	1437.16	2151.55	1290.65	1327.33		1074.94						4296.2		1514.04	1648.9	1371.84	1635.77					1368.17		1696.91
A0A0J7K8X7	Sh3 domain-binding glutamic acid-rich protein	4160.97	7057.93	4283.55	3828.02	2615.7	5690.44	2063.47		1929.54	15860.5	7590.07	6990.75	3507.09	9510.87	3866.76	6856.59	4550.45	4162.17	4594.55	4600.87		7853.31	2771.9	5663.49	5445.12	6288.9	6384.16	21513.7	27251.5			9789.29	1292.46		12828.5	5471.22
A0A0J7K8Y1	Titin-like protein (Fragment)												862.76
A0A0J7K908	Importin subunit alpha-7	992.793		712.609	2254.89		1477.13	847.919			1860.46	1348.07	1702.93	945.405	1751.78			1751.8		2919.95	3873.77	2696.95	1808.58	622.972			877.073	1631.83	2631.42							2363.76	3828.5
A0A0J7K916	40S ribosomal protein S7	3451.9					3760.33	673.431			1615.92	1194.41	7070.51	2538.17	5870.15	2400.21				1980.03	2455.97	7914.86	5246.01	5403.01			4853.62	4006.3	3193.87		7786.81	2201.65				2716.41
A0A0J7K959	Lipid storage droplets surface-binding protein 2	14267.3	8420.87	16920.7	4905.59	6043.43	16854.5	5743.11	9477.54	4813.39	6882.9	13381.4	27662.1	12154.8	13614.7	6074.18	6879.4	6455.24	27734.9	10317.2	7747.76		6080.61	9207.81	5035.5	6540.31	20123.1	14401.5	8540.55	11506.8	23336.4	16072.3	29303.2	4367.74		12231.9
A0A0J7K977	Pre-mrna-processing factor 39	2253.64					868.169	1044.59			3944.85	3128.27	1838.84	2275.03	896.819				2967.27			1906.46	3380.07				3666.3		1083.36							11754.5
A0A0J7K988	Integrase core domain protein	1957.87		4098.42			6303.5	5146.84		3789.42		2559.32	998.743	293.969	3200.16			3075.7	1111.86	1992.01	1655.53		4457.15	2769.29		1113.7	1835.23	7815.08					4392.41			965.422
A0A0J7K9E0	Putative zinc finger protein 224	1397.5		5449.08			2183.06	2950.43		5317.81		1802.65			724.904				2073.08
A0A0J7K9F4;A0A0J7MWB1	Gag-pol polyprotein			2315.71			4086.96
A0A0J7K9G4	Facilitated trehalose transporter tret1-like protein	180025		171194	720126	657929	354421	171926	748287	205123	2188.91	244505	118142	263902	180749	197291	921282	1201990	129947	820479	769017	11418.6	246438	102006	1278440	742078	138405	474765		4230.22	356801	220090	63638.9		112998	129346	396879
A0A0J7K9I1	Bel12-ag transposon polyprotein	4334.5					2206.2	1399.16		1864.89			4663.91	8636.59	2006.22	14645.5		1907.93		1382.12			2589.42	792.03			1095.17	2085.95	2257.44			1152.34					3101.24
A0A0J7K9I9	Inositol-3-phosphate synthase 1-b-like protein	271.903		4526.88			846.827	532.881		271.138	1710.45	345.693	554.305	728.182	356.426			704.008	450.696		348.857		447.521					777.97					1448.09
A0A0J7K9J7	Alanine aminotransferase 2-like protein	2065.99		7040.96			1832.42	1535.32	1717.6	1102.92	1963.93	3042.63	3020.71	1194.85	2420.56	1511.28			4213.81				2675.21	1568.18			865.191	1429.39				2569.41	7301.85			722.379
A0A0J7K9K6	Phosphatidate cytidylyltransferase, mitochondrial	25723.8		28833.9	2055.69		10982.6	34415.2	14780.8	27100.7	467.163	16161.7	23518.4	13434.4	26809.3	18673	2368.7	17389.4	22626.1	16004.9	4213.61		27710.7	14196.7		26015.4	22032.9	30074.3			12223.3	24131.4	21366.8			13333.8	17064.6
A0A0J7K9L2	Dipeptidase						1140.61				2885.49							3171.73											14035.6	44589.9				12692.7
A0A0J7K9L9	Mitochondrial dicarboxylate carrier (Fragment)			663.342				28.7558					681.942						147.2					342.534									206.6
A0A0J7K9N9	Ubiquitin-conjugating enzyme e2 l3-like protein	4121.37		10615.3		1648.32	5086.21	5337.36	3405.64	4337.23		5393.49	3238.3	2380.42	4643.13	2231.99	3900.6	3510.24	3479.67	2637.6	7246.42		2899.06	1925.91		1618.94	3658.51	5997.96				2758.38	5807.74
A0A0J7K9Q3	Proteasome subunit alpha type	9558.94	27195.8	8898.66	15406.6	19877.8	8895.5	7870.19	26786.9	7064.83	15811.6	10008.9	9315.72	10467.7	9090.44	12929	20138.1	18698	7923.63	11417.8	35170.1	5036.11	11773	13454.9	14649	22304	20429.6	14039.5	4208.37			11803.1	15795.9	14113.1		34827.2	14088.9
A0A0J7K9R0	Serine threonine-protein phosphatase 2b catalytic subunit	4251.72		3667.85			3116.47	3611.4		3398.34	909.622	2837.31	4705.05	5038.14	3314.68	4524.3		3069.31	2608.04	3375.29	3992.17		3007.53	3388.46		5259.17	3438.17	5207.95	1220.01			2011.63	4361.95			7369.91
A0A0J7K9R7	Pax3-and pax7-binding protein 1 (Fragment)	6719.38		13682.5			9493.4	10689.1		12215.6		10647.1	6210.28	6817.32	6239.25	4643.75		5102.35	7512.85	5241.86	11593		4783.89	2909.29	5130.41	3881.12	5385.23	6863.13				5701.96	15898.9				6069.79
A0A0J7K9S4	Fatty-acid amide hydrolase 2	2841.45		2979.09			1006.53	649.038		785.863		1059.68			724.85				651.933														1144.7
A0A0J7K9S6	Oxysterol-binding protein 1			1751.2						261.854		452.01																					883.33
A0A0J7K9T4	Troponin t (Fragment)	4481.73	6896.28								382.202		4206.15	3454.31	1397.91		901.709					2014	1733.85		317.353	5755.63		646.373	10690.2
A0A0J7K9U3	Protein misato	212.697		1053.16						322.287									325.969									508.275				700.599
A0A0J7K9U5	Cklf-like marvel transmembrane domain-containing protein 4 protein	7308.19	4472.59	9541.05	23536.4	15451.6	5855.08	9555.42	11883.3	8629.26		12066.4	8986.7	8706.73	5733.63	8044.73	12572.9	14020.3	13089.4	18015.4	31894.6		13951.3	942.213	23928	13976.1	6054.18	9668.72			8890.83	21846.2	2248.9			5081.62	18279.4
A0A0J7K9X0	Solute carrier family 46 member 3	1944						1350.65							1350.76	2008.59											5594.29					2941.66					4094.43
A0A0J7KA13	40s ribosomal protein s15a	5332.44	6830.35	3404	16981.4		6789.95	2425.04	4276.09	1675.49	4893.89	3621.19	4936.13	2040.87	6100.59			2646.63	8830.76	8288.22	2315.21	21071.6	7257.07	10459				3856.02	3126.92			7544.49
A0A0J7KA46	Glutamyl-tRNA(Gln) amidotransferase subunit B, mitochondrial	2608.37		4960.64			2294.45	2657.16		2584.08		3285.3	2607.3	3667.04	2968.45	1716.99		2455.46	2963.85	4736.81			2235.93	3760.29		2036.16	4084.78	3181.43				1803.64	5664.1			4540.87
A0A0J7KA50	Reverse transcriptase	2560.52		303.136			1726.04	4525.31		2813.71	1685.14	1720.77	1212.76	677.806	1058.68	1080.01		1033.78	1174.92	694.362	606.335		1394.38			1603.13	798.519	1356.4				906.647	2878.24
A0A0J7KA51	Ribose-5-phosphate isomerase			1336.52			266.979	247.788
A0A0J7KA55	Sodium potassium calcium exchanger 6	487.272		1478.96			315.518	871.361		1375.89		307.018	664.633	422.411	727.154	490.427			354.844		1076.46												1700.09
A0A0J7KA72	14-3-3 protein epsilon (Fragment)	100980	45464.1	83504	95430.8	54028.8	113293	80133.3	97649.3	111377	23666.8	123914	65610.6	56377.9	93777.5	61379.6	77753.5	108720	72091.5	80485.8	130724	31904	138148	57164.3	91667	124466	73360.1	135900	15083.2	23219.8	125784	75283.6	111563	21375		88325.9	57846.9
A0A0J7KA78	RNA helicase (Fragment)	5965.08	7163.24	6824.45	4584.87	4151.32	5519.79	3403.96	6889.77	3769.83	3627.52	6457.57	5408.53	3568.15	4174.91	3047.61	5637.92	5255.85	4629.53	7091.42	3107.97	22997	4865.27	2969.23	3979.74	8280.14	5343.69	5848.35	4225.77	10442.2		4812.66	9423.42	5376.56		2791.79
A0A0J7KA79	THAP-type domain-containing protein	1148.43			2715.21		507.536	225.375				987.129	1108.49	1263.71	751.511	1509.27		927.294	751.068	847.019				436.676				526.151	1368.43
A0A0J7KAB6	Vesicular glutamate transporter 1 (Fragment)	1015.29		1159.32			1422.86	2274.78		1558.79		918.187	1347.14	1243.54	1454.14	1453.15		1031.19	506.484		497.925		1086.22	922.972		2451.14		1550.87
A0A0J7KAD1	4_1_CTD domain-containing protein (Fragment)	616.168		978.373			519.274	124.155			341.58	2012.3	803.445		580.684				1853.34				597.489	489.11			1251.83	302.078	1888.88			1329.54	995.408			4177.18
A0A0J7KAJ1	Membrane protein affecting hemolysin expression		4653.68	502.794		545.12	195.178				40773.4		471.952		216.749	467.441		320.888		1026.2				286.833			645.544	373.395	2908.21	2676.29				1024.99		690.627
A0A0J7KAJ7	Camp-dependent protein kinase type ii regulatory subunit (Fragment)	2465.33					1141.64	707.551		1553.54		2570.58	1486.67	1568.38	1902.89	2542.37			2221.02				1089.5									3608.51
A0A0J7KAK8	Bag domain-containing protein samui (Fragment)	1114.55		1601.95			1412.79	545.733		491.971		2704.8	1727.53	986.692	1719.23	1504.58			2252.06				1550.18	4057.62			2334.16	3028.57	3763.39		1998.64					9602.08
A0A0J7KAL2	Gram-negative bacteria-binding protein 1-1	636.964		1410.24			604.297	693.931		500.989	656.242		2107.34		2445.75	2316.72			563.223			3486.14	1119.62	136.461				877.897	1178.69
A0A0J7KAQ6	Dehydrogenase reductase sdr family member 11 (Fragment)	2809.39		6308.62			2360.3	1190.9		1221.07	624.973	3056.48	1859.81	552.567	2692.73			1258.2	2021.15				2429.56				2435.21	1818.64			8373.34	7626.1	3999.01
A0A0J7KAR6	Acyl-:lysophosphatidylglycerol acyltransferase 1 (Fragment)			2014.07			277.265	242.186				482.024							313.168
A0A0J7KAS6	CHK domain-containing protein	496.293		1113.24			490.534	249.67			443.013		729.467		509.665				668.007										689.933							6048.46
A0A0J7KAT0	Isolate G1997 anonymous spider protein protein (Fragment)		21359.4								45781.4											4086.74							9850.99	52785.8				4100
A0A0J7KAU7	Succinate dehydrogenase cytochrome b560 subunit, mitochondrial	20895.9		62544.4			43453	48215.9		78170.7	2559.6	65051.2	894.809		14471.8			17890	13489.6	2754.17	3449.91		4024.85										29400.1
A0A0J7KAV5	Calmodulin isoform x1 (Fragment)	74957.5	16104.7	356653	40775	38870.2	191678	218859	66529.4	204090	90474.5	180411	85757	137992	44535.8	98887.9	114272	143056	48944.7	239046	242841	8799.23	61010.4	109357	55429.7	144988	112452	154041	93074.6	20914.6	65529.3	31331.4	54846.9	16080.5	171345	116933	55698.3
A0A0J7KAW4	NADH dehydrogenase [ubiquinone] flavoprotein 3, mitochondrial	7372.5		6872.07			5343	10035.9		7853.88	3751.88	6468.13	5660.97	7759.85	5773.77	13080.8		2379.92	7369.21	4178.57	3542.49		4628.32	4857.69		5278.92	10649.6	6478.27				8151.08	4571.23			12827.4	4160.38
A0A0J7KAW6	Prolyl endopeptidase	30670.5	18725.5	50176.4	59728.8	46331.6	48101.1	38258.1	74173	35057.5	10918.3	61195.9	28252.3	38089.7	37726.3	25774.5	90302	68741	29332.5	68214.9	69163.2	9315.15	36835.4	48719.2	69057.1	64993.7	41162.2	49799.8	5031.47		40004.9	25404.9	34179.5		244239	52218.5	39368.7
A0A0J7KAX5	Wd repeat-containing protein 23 (Fragment)	2203.48			6917.42	5953.13	3339.49	1214.46	7075.55	2515.19			2102.98	3508.3	2882.3	2716.92		7451.73		5462.69	12786			3547.91	5927.02		7644.49	4556.1	1710.44							9450.29
A0A0J7KB02	La protein (Fragment)	946.419		354.415			992.253	421.581			1329.04	242.021	1254.33	998.588	857.282	1307.38
A0A0J7KB15	Fatty acid synthase (Fragment)	3942.93		472.508									568.17		1414.45				1358.13				2042.67	823.802								2035.1
A0A0J7KB16	Mitochondrial import inner membrane translocase subunit tim16	2570.05		5477.52			2952.37	5423.66		4630.01		2385.62	2162.71	980.93	3211.53	2841.98		1767.28	1592.84	2081.45			6347.47	2204.66		2148.35	2921.09	4790.08				3351.21	4816.96				1995.69
A0A0J7KB20	Histidine triad nucleotide-binding protein 1	7405.22	8424.5	1563.02	180671	154588	893.991	1200.04	246857	1353.1	7034.45	26536.4		5371.89			264966	124687		191419	431243	6289.11	83767.2	55779.4	232334	153967	166973		9485.39	2577.41	54756.8	270267		6319.38	204758	81223.6	125791
A0A0J7KB39	Sporulation-specific protein 15-like protein (Fragment)	52359.6		72723.2	863.748	2848.64	43604.2	45600.3	25549.5	55037.8		49833.9	36716	45093.9	36803.2	51104.1	7813.09	43499.1	45025.9	36442.1	11705.1	126027	44150.6	31806.1	3587.94	49066.8	45815.9	51783.7			18951.7	42569.1	61439.9	2585.26	186686	32890.4	60223
A0A0J7KB40	Dihydrofolate reductase	1085.49		2287			800.067	437.502		428.384					1062.82				614.388
A0A0J7KB66	Cyt-b5-pb	76239.9		120624	172641	171413	99096.2	85639.6	215850	128078	10142.2	220426	62929.6	71505.2	96765.7	61767.3	288793	170986	89787.9	328619	253495	23329	73245.3	35867.5	171228	204540	153629	128510	10874.1		151856	102818	90767.8		626974	113671	196014
A0A0J7KB88	Eukaryotic translation initiation factor 3 subunit I	1973.01	577.152	1914.27			1296.13	561.534		475.833	884.915	1928.23	1388.28	1107.09	1402.92	1263.14		1250.25	1977.68		574.013	7349.59	1972.36	298.777			504.156	835.565				3770.98	2433.86			258.804	409.115
A0A0J7KB89	RNA helicase	1046.7	4985.06	688.572			919.042	842.023		1062.91		660.376	624.862	769.164	766.749	546.878			513.466				988.048			895.972		968.223								521.294
A0A0J7KB90	Vacuolar-sorting protein SNF8			378.551			211.071	172.627		152.481									304.983
A0A0J7KBB2	Venom dipeptidyl peptidase 4 isoform x3 (Fragment)										1739.61								463.438													865.7
A0A0J7KBC1	Heparanase-like isoform x1 protein	355.841								596.758		603.613			122.615				578.705													346.696	900.007
A0A0J7KBD0	Protein i m not dead yet-like protein (Fragment)			721.713
A0A0J7KBF0	Putative salivary secreted peptide-like protein			2942.33		2524.8	21819			1266.1	2245.31		629.411					9514.74	1445.44					1032					2461.7
A0A0J7KBF7	Putative atp-dependent rna helicase ddx46-like isoform x2 protein	2708.06		5985.59	2775.62	3150.49	2107.42	3003.98		5629.32		4206.47	2022.45	2602.81	2701.97	3661.14	5704.88	8837.99	2371.26	10095	6597.74		2440.21	354.959	3227.85	2992.74	1945.64	2584.79				3123.09	1151.2			982.911	7431.45
A0A0J7KBG8	40S ribosomal protein S9	13002.6	20132.4	11239.1	24721	3751.42	6814.42	2500.33	19723.7	1930.96	11718.1	10902.6	7302.94	8624.38	8290.23		13994.2	5326.76	8123.86	9312.34	7048.16	46649.9	13253.6	19002.3	4485.6	10189.6	13178.1	7192.52	13421.7	7399.55	21828.8	10973.1	7116.33	4274.63		14805.8	8127.52
A0A0J7KBH0	Hypoxia up-regulated protein 1	1245.03		2417.07			2675.28	597.802		1138.62		1894.75	3316.02		2776.72				4207.2		6847.35			6820.95									2163.6
A0A0J7KBI7	Twitchin-like protein (Fragment)	1306.17											1185.28
A0A0J7KBK5	Electron transfer flavoprotein-ubiquinone oxidoreductase (Fragment)	833.761		1325.89			390.207	342.061		1174.02	1740.83	531.568	832.449		427.576	473.914			654.63				538.769									560.296	1930.11
A0A0J7KBK7	Pyruvate dehydrogenase E1 component subunit beta	8494.14	4662.51	17829		29854.7	5939.02	9060.55	3540.43	5687.36	5501.27	4260.07	7833.28	6438.36	6338.2	5533.31		3190.62	8622.27	7264.88	2074.23	15996.4	4616.21	6430.21		2971.03	8399.24	8669.05	7122.29			9359.6	17637.1			6940.27	6190.37
A0A0J7KBM9	Oxysterol-binding protein 1	544.522		2440.47			711.392	1137.56		1467.09		1493.94	575.613		596.269			2032.59	897.842		945.05							1027.9				814.917	1518.76
A0A0J7KBP4	UDP-N-acetylglucosamine 4-epimerase (Fragment)	2088.92		2475.57			1152.62	578.747				2117.55	2195.4	748.664	1331.18	282.738			4295.01						4261.97
A0A0J7KBR2	Heterogeneous nuclear ribonucleoprotein u-like protein 1 protein (Fragment)	839.258		1198.55			523.637				1093.83	2936.8	1098.48	442.98	727.168	364.892			1059.49		744.945		1893.82			832.342	1360.3	468.006				2604.09				1100.65	1337.75
A0A0J7KBS1	Alpha-glucosidase						9169.82				2900.73							2641.99												2566.91
A0A0J7KBS6	Exocyst complex component 2			361.339				265.944					379.747		662.152				1330.03			2184.25	1354.94				958.878						4847.48
A0A0J7KBS9	Protein ergic-53	795.855	1001.77				644.425				616.911		1095.59		1529.03	603.199			1636.55				1485.46				494.812		857.925							1069.91
A0A0J7KBX5	Selenoprotein s	5226.01		3383.8			2991.79	3501.39		3812.68	1185.7	1451.13	2393.77	3272.14	2978.3	5336.1		3285.16	2288.61		1645.02		1509.83			3044.99		3186.05					1332.66			3703.79
A0A0J7KC06	Lipid storage droplets surface-binding protein 2	466.115					489.632				806.81	750.498	460.393						1288.38														1029.78
A0A0J7KC10	Uncharacterized protein	757.19					1051.15			823.01		1230.02							957.876
A0A0J7KC56	Actin-interacting protein 1 (Fragment)	4844.03	1521.4	24205.3	5363.76	6900.19	9941.13	8049.42	7267.17	7170.8	33968.3	10634.7	8991.42	8182.07	6892.21	5298.95	7793.92	14795.7	5029.69	13559.5	18841.2		8817.81	6585.1	6842.83	6441.82	7491.57	9182.35	1465.91			6515.03	9841.53			28405.7	5480.64
A0A0J7KC59	Vacuolar protein sorting-associated protein 28 homolog	113.161		562.462			190.952	63.0155		118.193		409.229							700.336														1100.86
A0A0J7KC82	Elongation factor 1-delta (Fragment)	1004.17		13452.5			3716.71	3240.03		2711.04		7598.97	368.284		1284.07		3396.86		5042.23		3481.78		754.544		2481.12			1577.44					9702.93
A0A0J7KC95	Fk506-binding protein 4			477.885			204.922					223.062							171.467														778.584
A0A0J7KCA5	Laminin subunit beta-1	3054.47		1095.64			1504.95	498.1			988.236	6432.62	5207.49	5415.89	3583.38	1877.72		3063.46	5320.72		985.492		2202.3	1030.38		5232.73	3949.36	4518.92	1528.69	3475.74		2947.16	2516.03			3302.51	3917.2
A0A0J7KCB2	Serine arginine repetitive matrix protein 1 (Fragment)	1143.51					1036.73					1296.52	1251.91	978.529	406.951	1425.76			1880.63				1105.83	1314.04			1770.05	1600.85				1612.19				1633.31
A0A0J7KCB3	NudC domain-containing protein 1			630.183
A0A0J7KCE3	Serine--tRNA ligase	2775.59		2020.18			3254.06	1085.21	4872.15	749.361	2733.74	2514.48	5056.44	2648.67	5775.98	1907.14	3735.37	5127.65	2853.7		3562.1	5181.77	5432.6	9736.33		3037.4	3864.02	3514.91	3028.49			2171.59	3395.19			5618.06	4525.29
A0A0J7KCF4	Dynein light chain axonemal	12263.7		12374.8			7076.64	8176.22	5395.96	9418.24		13036.8	9657.79	12534	13329.2	19915.7		9062.25	10986.7	6338.21			6880.25	14348.4	5287.27	15480.1	20417.4	13338.3				11270.5	11394.8			21434	10381.1
A0A0J7KCG9;A0A0J7KH63	Cytochrome p450 9e2	879.213					532.044	384.048		625.526		896.916			582.171				1809.76
A0A0J7KCJ5	Laminin subunit beta-1 (Fragment)	1055.15										5605.59	2530.93		641.302				908.444								1042.83	495.466				751.979	5129.43
A0A0J7KCJ6	Ribosomal protein L19	4450.87	2973.75	1248.48			4648.78	1124.77	5099.91	848.868	3560.87	3934.67	3716.35	2728.02	3878.34	1875.11		3293.22	3650.52	2984.69	2645.56	1733.95	4955.49	4457.43		1976.47		4409.31	1763.93				1761			2303.66
A0A0J7KCJ8	Ubx domain-containing protein 2	1126.87		504.615	2404.47	3079.37	675.346	608.605		1835.4	568.641	866.974	1103.32	773.863	469.681	1400.79	2467.81	1694.22	859.981	2445.13	3355.41		1134.88		2706.54	3499.64		1059.6	1910.64			1151.57
A0A0J7KCL5	Heat shock 70 kDa protein cognate 4	49513	30766.5	52020.4	25832.3	45614.5	62008	32356.9	52372.4	33108.9	33112.4	45027.2	39483.9	28700.8	35767	33878.2	43810.3	44042.6	59075.6	39756.5	35337	26412.9	44231.2	22783.1	29656.5	31761.2	31283.4	37271.3	32390.5	43817.1	45948.8	41574.6	56910.8	17284.6	53199.7	16003.6	30913.6
A0A0J7KCN6	Fumarate hydratase	326573	24698.5	810237	6229.19	15658.3	272923	423297	129021	434332	20002.6	373222	186616	186180	214235	255180	41247.3	237722	307380	159300	38547	17316.9	288470	107620	25718.5	304312	170369	373056	9583.91		145259	176641	949642	82240.2	527319	65977.4	109213
A0A0J7KCP0	26s protease regulatory subunit 8-like protein	59850	32024.3	99383.9	92441.7	109169	63463.7	65908.8	175908	98779.5	10233.1	78672.8	37705.8	57498.8	46849.9	94367.3	127968	99906.9	42526.6	85962.2	291424	33603.9	37817.8	19373.9	88273.1	59447.1	48147	58726.6	14916.4	21894.2	48104.3	63803.2	52926.6	25352	62387.9	51107	79693.4
A0A0J7KCQ1	Myosin-ib-like isoform x4 protein (Fragment)	605.982		835.382			1261.85	423.855		865.227	3561.31			529.201	820.428				1746.05										5266.54	4032.79		1463.14	2974.5
A0A0J7KCT5	Dynein heavy chain axonemal	33529.2		27605.9		6783.98	24502.7	23687.2	10619.4	29424.9		27833.1	28028.6	29605.8	25021.9	41563.9	1569.18	23950.8	22251.6	23366.4	5635.18		24497	28240.3		38616	18857.3	33051.9			11397.1	14532.5	31368.1			24648.6	41195.8
A0A0J7KCT9	Cell division cycle protein 23-like protein	2408.31		1955.08			1631.24	1760.75		2015.31		3235.7	1408.75	1805.6	1652.24			658.147	3363.84				1860.63	930.833			2388.45	2286.78				1665.51	3014.69			1129.27
A0A0J7KCU9	Phenoloxidase subunit a3	31775.1	60459.2	14895.1	19859.4	16348.4	16641.6	13358.7	70256.3	10472.2	90295.3	24346.1	40911.8	29759	45946.3	50680.4	14514	33251	27773.2	59611.8	21767.1	166024	179018	63055.7	28484.7	244227	33941.4	43061.1	45624.6	27199.7	14959.9	239256	23841	49914.4		98951.7	53513.5
A0A0J7KCV0	Cytochrome p450 9e2 (Fragment)			1175.18
A0A0J7KCV3	Mannose-6-phosphate isomerase	557.844					692.065	299.527	1801.27	298.717	684.504		519.677	708.168	567.908	491.395							722.859	391.903		552.909	694.633	693.204	564.434							443.15
A0A0J7KCX1	Fatty acyl-CoA reductase	1761.54		2833.45			671.605	1091.13		1227.94		1125.9	1605.93	986.674	1508.57	717.8		896.182	1788.68				908.595		1079.9			1540.34				1778.66	2674.25
A0A0J7KCY7	Vacuolar protein sorting-associated protein vta1-like protein	3674.91		3725.37	1420.62	3547.21	5879.66	2721.23	5332.39	1918.1	3845.87	4393.85	5925.25	3857.78	5759.37	2409.35	5163.88	4916.99	3445.8	5118.58	6765.8	3705.86	9283.44	2286.05	3172.35	1525.91	5980.17	5054	3360.71	5845.07		4731.44	4722.17	1044.49		3902.99	2837.34
A0A0J7KD19	Rna pseudouridylate synthase domain-containing protein 1						4063.83						2625.66		3063.73	2460.74		1161.72		911.907	769.965		2067.71	1202.94			1471.01	2026.74				883.99
A0A0J7KD34	Apolipophorin-III	9303.66	24500.5	8669.6	1934.19	2550.79	16336.5	10815.8	6002.9	5061.77	7962	11378.1	48263.5	12104.1	36713.9	16415.5	4714.55	4487.56	45418.9	20051.7	9738.61		15825.7	8768.82	4260.33	12142.8	4883.76	10651.9	12441.8	9177.41		51963	33369.6	35128.8		9777.75	7873.57
A0A0J7KD52	Spermatogenesis-associated protein 20	8584.32		9243.17			5484.41	5474.5	8484.48	6286.21		7859.97	7234.59	5614.91	5466.6	8803.97		10975.8	6195.5	5763.34	2420.8	10889.2	7421.93	7957.9		7463.43	9069.9	8206.89		36132.1	16609.7	7769.5	7672.92			8576.14	11575.1
A0A0J7KD70	Putative oxidoreductase yrbe-like protein	98949.2	2443.62	211498	14086.8	6379.5	278279	132639	132917	41680.5	92545.1	164597	574327	109743	395766	92640.3	33532.9	147784	306833	323336	65226	21021.4	190172	215213	24084.7	67941.1	151804	82919.4	5533.73	3616.87	227750	149579	101368	62089.2	104112	160644	179887
A0A0J7KD89	Protein kinase c and casein kinase substrate in neurons protein 1-like protein	1774.42		2558.76			2415.88	1401.9		1566.98		2096.04	961.164		710.02			1624.44	1244.33	1576.27			1546.55			1116.95	1090.29	1102.18
A0A0J7KD93	Dynein heavy chain axonemal-like protein	5037.42		12525.7			6219.33	6932.06		8120.9		7028.9	6891.77	7768.92	5563.17	8064.72		3444.07	6095.84	4746.66			6063.66	4814.39	5717.19	4034.12	4428.58	6397.62				10088.1	18525.4			14759	3837.88
A0A0J7KDB3	Nucleoside diphosphate kinase 7-like protein (Fragment)	30668		54100.1	1714.91		25613.1	40294.6	12447.8	18547.4		34763	23267.9	38585.1	28948.1	27040.1	2937.83	22065.3	29941.6	17763.4	6219.7		27508.8	10311.4	1594.92	28485	14640.8	43066.9			9786.67	19948.7	31658.5			6792.76	15076.5
A0A0J7KDB8	Wd repeat and fyve domain-containing protein 2-like protein	1891.31		3258.01			1331.95	1110.9		598.711		1555.35	3203.52	1891.48	1787.06	1349.57			1080.02				3263.44					1214.51				1999.4
A0A0J7KDC1	40S ribosomal protein S26	8856.78			3692.07	1075.14	1541.04		3476.31		1899.37	2747.98	2960.64	1446.93	2388.52	3175.39	5375.7		3947.75	2425.13	1334.38	6499.35	2569.15	3802.1		6606.91	2556.02	2994.48	1500.44			5886.61				3531.5	5141.13
A0A0J7KDC7	Dihydroorotate dehydrogenase (quinone), mitochondrial	30348		67323.7			16875.7	46907.7	12883.2	33510.1	3699.15	16690.3	14641.7	19692.6	18418.5	37757		12503.2	20631.2	7656.17	5784.06		11493.7	12591.7		19221.8	37177.4	25531.4			9086.06	14459.6	25612.3			16481.2	11145.3
A0A0J7KDF1	SelT-like protein			2120.47				125.917		125.862		106.45							230.411														716.49
A0A0J7KDG1	Glyoxalase domain-containing protein 4-like protein	23590.1		81289.6	17841.2	16596.1	23716.3	26105.5	18398.2	28634.7	2499.67	31256.5	19367.7	21971.3	18276.7	16659.6	12529	31170.7	30876.7	19111	24021.5	18775.4	18589.7	6854.62	12799.7	17543.7	26822.5	26520.3	2450.95		38283.9	6938.3	30165.7		12676.2	19769.4	38034.1
A0A0J7KDI5	Putative g-protein coupled receptor 158																		72.9336
A0A0J7KDJ0	Ubiquitin carboxyl-terminal hydrolase	837.683		3622.36		2547.33	2042.64	1510.9		2031.55		2881.98	1172.41		1795.96			2173.72	1508.66	3235.98	3021.82			3576.32	2642.73	3478.95		2296.67				1067.82	5216.79			8286.66
A0A0J7KDK3	Cilia- and flagella-associated protein 206 (Fragment)	40637.7	11850.6	57635.6	1454.36	3194.03	30818.5	56788.7	12074.2	58606.8		37347.6	30511.9	32516.4	41405.2	51114.3	3479.07	26854.9	33525.7	22513.6	5904.37		28012.4	11909.5	2305.79	33486.6	21431.8	35080.7			7692.07	23342.4	17330.8		151493	16944.5	47880.4
A0A0J7KDK5	DUF3421 domain-containing protein	6423.23	3183.35	7790.52			5262.34	2042.99	4425.93	2228.6	4937.23	18925.7	10096.3	3718.77	6163.28	4806.8		10145.4	12470.2	2409.21	2761.27	22950.7	7325.98	1862.58		7117.94	8952.81	7694.21	11647.3	4394.85		11458.5	15768.4	2236.74		7064.99	11686.2
A0A0J7KDK8	26S proteasome non-ATPase regulatory subunit 8	2566.27		4118.32	6596.61	5702.3	2153.29	2574.57	11847.7	4955.03		4610.79	1555.77	2937.36	2798.67	6472.26	10387.1	3621.79	2443.61	3593.57	7847.46			4677.15	4468.73	5327.09	4957.37	2212.52				6437.16				16537.4
A0A0J7KDL6	Nuclear protein localization protein 4-like protein (Fragment)	3218.69		5458.75	6078.01	4561.98	3502.43	2694.98	7352.46	4518.98		6136.94	1783.38	2997.3	2689.31	3069.44	7333	6456.89	3067.87	7473.73	5437.25		3840.74	2647.92	5594.81	5924.37	3040.55	4101.74				3927.51	4974.99		127894	3119.56
A0A0J7KDM6	Protein ddi1-like protein 2 protein	3208.64		4182.98	9973.08	10734.1	4608.73	3262.04	10505.5	5745.96		7912.45	2827.6	2698.24	3595.52	1956.44	15910.9	6127.19	2654.78	10310.5	13752.1		3584.04	2759.8	13223	7389.07	3719.07	3342.42	2612.22			4385.89	8211.63			6039.76	5955.43
A0A0J7KDN7	Kinesin-like protein	5405.44		3634.67			4611.65	1832.97	6679.44	1964.06	4312.21	5448.36	6293.91	3797.99	4518.31	3601.46		5654.52	5507.57	7593.82	4322.22	10810.2	8505.65	2647.78		4738.77	3059.62	4430.88	4689.81			5121.35	8110.96			3753.22
A0A0J7KDQ3	Epimerase domain-containing protein	498.519		3741.1			315.435	338.273				587.051	848.34	637.25	1108.61	597.575			571.547					449.586									1091.3
A0A0J7KDR0	Signal peptidase complex subunit 2 (Fragment)	341.405		223.432			438.272	171.447		295.64			586.195	98.1741	954.115	955.508		330.047	647.245				907.494	756.146			378.513	396.698				1291.98				921.744
A0A0J7KDR9	Ileal sodium bile acid cotransporter (Fragment)	866.452			2552.43	5985.66	2559.06	824.892		840.965	7908.51		1953.39	1287.53	1304.62	1276.83	4437.73	3600.64	461.789				2541.86		4939.58	3946.99	1718.84	1613.89	16358.7	32054.5		1991.34		10710.3		997.808
A0A0J7KDS5	Angio-associated migratory cell (Fragment)	249.484		131.553								178.746							122.052
A0A0J7KDU0	Oxidation resistance protein 1	788.15		455.433						362.866			323.096			357.381											687.147
A0A0J7KDU7	Myosin-ib isoform x3	3837.67	43258	3919.97	22531	12137.3	5628.21	3008.43		4640.66	31335.5	3300.46	2210.54	2930.12	4166.28	4001.72	5480.87	5041.56	4139.33	8833.65	4141.28	2818.51	5572.6		9693.95	12067.3	4124.69	3671.05	41788.8	57756.1	19725.5	10252.3	7462.04	27095.8		4839.56	3648.36
A0A0J7KDU9	Ejaculatory bulb-specific protein 3	11159.2	12824.8	16609.4		2548.46	11482.5	16160.9	3774.78	3210.8	125084	6081.32	13109.9	1497.85	20636.6	2467.43	5846.72	2589.4	4477.73	10049.5	11483.6	5388.24	21702	4394.99	5063.69	5500.67	3324.77	11970.6	28071.1	7098.13		21565.6	2992.25	4353.68		5707.81	5579.84
A0A0J7KDV9	Protein angel-like protein 2 protein (Fragment)	2371.51		6094.49			1861.53	3301.4		2537.49		1297.82	1198.81		1015.69	1887.24		1149.29	2369.6				1636.93				2178.38	1730.05				1192.23	5246.74
A0A0J7KDW9	Hydrocephalus-inducing-like protein	19673.5		14190.5		1219.62	13545.2	13672.9	8011.39	18057.2		19895.1	17294.2	20003.8	15387.8	20333.2		13746.5	10101.9	16774.3	1768.91		21454.5	13675		18343.8	13186.2	18124.8				14666.6	25262.5			17815.5	20548
A0A0J7KDY1	Nuclear pore complex protein nup205	2788.03		3883.29			1134.43	1959.45		2437.67		3925.47	2148.97	1459.49	1722.81	1206.22		1704.7	2570.25				860.76				3207.41	1402.31				1422.31	1428.98
A0A0J7KDY8	Galectin	5500.84		4467.83			3529.19	3625.02	4934.19	1362.71	3407.4	3863.59	4833.03	4194.02	5185.13	4016		3416.83	4792.02	8756.77	7248.2	22939.3	8539.75	6066.94	5834.66		4359.19	5269.52	4909.72	2582.2		6638.43	7514.28			3667.58
A0A0J7KDZ4	Fatty-acid amide hydrolase 2	2611.29		583.137			2317.59	3815.94	1429.04	1772.2	1864.13	1588.21	2913.24	1841.56	4413.75	1591.83		3933.14	864.296	3189.21	1197.2		3585.03	2774.16	4269.66	5852.22	3926.24	4856.25	1752.11		1542.19	1789.48	1088.22			2320.42	3322.48
A0A0J7KE00	Soluble nsf attachment protein	2576.61	5326.8	3390.6	2615.19	3450.87	3432.88	2602.59	6852.46	3232.91	2665.36	3621.2	2558.18	1549.52	2744.93	625.662	6735.15	3628.16	2932.91	4539.93	5970.72		6293.71	1161.46	6295.21	4005.15	1839.21	3944.75	5602	5400.94		3071.14	3671.15	2400.51		1526.83
A0A0J7KE22	Elongation factor 1-delta	2659.39		4147.15	3914.18	6004.1	2844.23	3227.32	17562.5	2940.68		5871.16	3253.59	2289.93	2367.57	4828.72	12518.5	2840.65	5399.99	3644.03	6676.25		3625.74	4664.85	5166.22		6977.52	3022				7572.47	19039.1			11755.3
A0A0J7KE31	Calcium-binding mitochondrial carrier protein aralar1 (Fragment)	7410.34		3987.56			2442.29	3087.7		2806.49	2367.28	3626.58	3017.02	4465.19	3750.7	4178.28		4415.11	4523.52	4407.38			4948.8	2581.46		20433.6	3032.29	4318.49				6612.36	4729.52			2170.63	6094.94
A0A0J7KE56	Ubiquitin conjugation factor e4 b (Fragment)	1205.26				5010.14	887.503	433.308		1445.86		1926.99			969.478	987.67	6839.38	4704.41	1255.11	6634.08	3401.95				3903.71
A0A0J7KE67	Protein kinase shaggy-like protein (Fragment)	1291.48		2856.81	1276.29	1122.76	1519.18	1744.79		1227.04		1991.54	1324.59	1102.26	795.887		1769.61	2107.03	1337.19	2790.39	1520.01		1746.98		3890.14			2179.74				1274.21	5068.6
A0A0J7KE95	2-oxoglutarate dehydrogenase e1 mitochondrial (Fragment)	1642.61		2836.41			705.89	503.886		381.187		387.325	930.353		811.668	840.814			906.029				526.859					628.249				817.93	1533.22
A0A0J7KEA0	Nuclear transcription factor Y subunit	4277.89	6110.57	2418.71			2777.57	2033.17	8767.17	905.339	13503.4	2298.26	4488.53	3648.29	5447.04	3557.75		2223.8	2339.91	4350.9	4039.43	34412.1	14979.5	5155.1		4083.62	3074.63	4211.95	9472.11	10878.3		12587.3	4930.27			8492.92
A0A0J7KEC5	Apolipophorin (Fragment)	2818.31		2596.12			2001.12	968.226	5652.9	755.535	1466.37	3048.04	4577.29	1907.68	3323.9	2626.19		2484.63	4297.66	4076.02	2537.16	6984.95	4993.86	3028.06			2152.15	3432.78	3086.61			6927.92	3916.27			5066.92
A0A0J7KEC8	Cytochrome p450 9e2	2087.51					857.215	766.558		887.256		1232.74	2605.44		1096.76	1642.58			1136.87			2344.22	1836.74	535.013			1313.39					1471.37
A0A0J7KEE8	T-complex protein 1 subunit theta	17130.6	2064.79	11166.2	30723.6	31961.5	11306.8	10234.6	40199.9	14127	3547.79	24326	12765.6	14401.2	14516.1	17085.5	34018.3	32240.7	16773.6	35652.5	34071.5	15751.1	12663	10068.5	23188.4	16838.1	25333.5	21637.2	3015.94	3531.95	41695.2	40645.8	32111.7			21887.4	23261.2
A0A0J7KEE9	Serine/threonine-protein phosphatase 2A regulatory subunit B'' subunit gamma	18529.6		9999.27			8709.96	17951.5		11915.8		10081.3	9393.02	13090.1	7960.25	28879.9	1926.06	3393.24	9120.04	5571.28			9093.94	15246.5		4709.31	21788.3	10983.7				15634.5	8124.42			14270.2	3681.22
A0A0J7KEF9	Carboxypeptidase	1739.7	5407.84	1148.37		1712.46	669.346		4533.86	387.086	7647.58	484.699	1269.23		1077.01	2451.83	4245.19	3642.72	1248.08	3168.35	9423.51		1004.81	1740.48	2424.91	4326.34	2455.09	2666.26	2743.46	2467.91			1632.91	1588.94		2786.02	3933.05
A0A0J7KEH2	Aromatic-l-amino-acid decarboxylase	783.309		970.426			1049.84	1569.72			10375.8		2407.23	1356.62	2417.74	4145.63					1218.88		4358.05	1028.47			2106.75									1731.53	1485.58
A0A0J7KEI4	Rna-binding protein nova-1	325.744		6643.98				641.837				555.486	266.379		114.686				1866.12														1476.38
A0A0J7KEI5	Cell division cycle protein 16-like protein	335.126					289.95	146.572		279.021					335.115								409.449					530.623				299.642
A0A0J7KEJ9;A0A0J7KRQ6	Histone H2A	164155	848496	71925.9	153666	62246.1	38974.3	90541.7	54955.9	54556.5	333811	55377	50977.4	72037	68701.3	89830.3	551509	82787.8	50923.9	92029.9	28722.3	37453.8	201777	63775.3	56062.7	472216	63321.5	86191.6	140189	125002	387624	62725.6	21655.3	149026		56288.1	61392.5
A0A0J7KEK4	Alanine--tRNA ligase	1833.81		3920.44			1306.82	1324.28		813.335			698.78		513.244	2302.23			783.557				2153.31			6016.29		1962.09
A0A0J7KEL4	dTMP kinase	155.89										195.156							549.608				361.858										1165.5
A0A0J7KEL6	Putative medium-chain specific acyl-mitochondrial-like protein	27740.4	57759.5	38192.7		6555.04	18370.1	27346.8	6409.28	10126.6	106958	17756.2	31538.1	10362.3	13473.8	13083	2800.38	18924.2	26250.4	17988.3	9877	6150.69	13270.2	16235.6	3746.64	9407.63	14743.6	16090.1	13643.5	9945.17		19154.5	34110			8870.72	6924.5
A0A0J7KEP0	Pre-mRNA-processing factor 19	551.834					167.757	61.947					431.336		471.396				416.165	422.5												382.563
A0A0J7KEP4	Proteasome activator complex subunit 3-like protein (Fragment)	1541.23		6215.41	15978.5	12122.9	1827.17	855.461		1410.62		3350.88	1839.89	3179.81	1167.17	3188.59		12174.1	1056.44	13097.7	4932.02	4927.64	2485.56	11175.3	12164.7	11256.1	5590.82	4677.34				4191.75	5042.64			39490	16301.2
A0A0J7KES1	Mite allergen der f 3-like protein		1838.01	1677.5			18992.6		1924.77	656.992	57169.5							5419.12	88.1165										11382.2	35825.8				5589.16
A0A0J7KF04	Adenylyl cyclase-associated protein 1	6104.13		5689.31			12416	2759.78		2463.01	14017.1	4432.29	4164.95	2188.81	8577.07		18024.8	4011.04	5959.75	5886.28	10228.1		10852.6	6221.53				10383.2	8367.68				12399.7			4170.78
A0A0J7KF09	Nad-dependent deacetylase sirtuin-2	1343.98		2416.7			1270.51	2534.84	5476.66	1916.28		2063.75	1123.33	562.682	1722.7	765.889		923.716	959.49	963.358			2097.89	428.157				1153.14				1255.86	2442.12
A0A0J7KF11	Translocon-associated protein subunit gamma	244.787		1380.95			221.971			86.569			261.515		171.582				402.773									190.401
A0A0J7KF16	Guanine nucleotide-binding protein subunit gamma	760.035		546.225			478.255	666.872		694.192	636.571	794.206	717.389	421.284	561.123	708.159					1554.27			1013.1			584.674	779.857				1545.17				1989.35
A0A0J7KF28	Glutathione s-transferase	10358	10267.2	11026.3	8583.06	23227.3	15549.4	5996.96	31705.6	7759.78	12222.8	14466.6	27000.2	17480.8	22158.3	15947.1	51283.6	10081.1	12874.2	17319.5	28805.1	23178.6	27879.5	18842.2	27539.6	18050.6	20649.4	11752	14912.7	22641.2	37674.4	21792.9	8032.42	12967.2		62174	9256.84
A0A0J7KF36	Tachykinin-related peptide																											500.161
A0A0J7KF52	Myelin basic protein	899.724		548.671	1497.85	2568.05	553.379	352.755		769.584		818.344	201.495	663.422	355.202	376.627	1267.69	946.765		923.182	3026.92		1292.87		1813.74		403.152	650.773									1064.66
A0A0J7KF57	Protein fam10a4 isoform x3	51643.2		3489.57	35419.5	53171.2	54319.7	22306.5	54502.7	45955	5669.75	39259	32227.1	39523.9	30184.9	36854.5	66771.9	57613.1	19468.8	72460.6	97076.6	10964.2	38859.3	44773.5	44351.1	51063.5	26426.5	55879.4	6398.65	2385.54	29209.1	22383.3	20299.9			61642.1	15528.6
A0A0J7KF62	Cytochrome p450 9e2-like protein						1167.75		3529.84		4516.29		1900.93		1829.19				2371.37			2361.13	3107.06				2643.95		5540.14	5125.06
A0A0J7KF68	Rna-binding protein 45			898.902
A0A0J7KF95	Glycerate kinase-like protein	86065.9		87105.1	3192.84	3677.24	81791.7	50718.5	36011.2	124213		40819.6	40815.9	31904.7	33947.5	61614.9	16360.2	82094.5	16918.1	60203.3	10761.4		110580	41363.7	5000.77	66449.5	56185.4	52847.5				9387.69	46724.7		170805	32506.8	90951.9
A0A0J7KFC1	Innexin			1190.54				118.692		202.097									562.071
A0A0J7KFF5	Cue domain-containing protein 5-like isoform x1 protein			485.803			604.914					886.979	2114.84	1493.89	543.423				1275.81									1164.71	470.084			827.117	1107.35
A0A0J7KFI2	Epidermal growth factor receptor substrate 15-like 1 protein	1060.94		941.952			723.536	329.113		232.044			1264.16		827.616				907.168				952.271	861.896								789.068	312.228
A0A0J7KFI9	Heat shock protein 83	724.557	2146.8	5616.08	1521.39		527.142	420.088		229.315	704.903	349.841	441.025	247.146	272.728			986.871	770.122									1336.74					691.465
A0A0J7KFJ5	Basement membrane-specific heparan sulfate proteoglycan core protein (Fragment)	1138.54		3669.04			1933.99	251.311					637.764		659.449				699.887													1715.81
A0A0J7KFJ9	Glutathione s-transferase	10197.7	3677.71	17337.2	2323.71		20817.7	4782.1	6749.68	4806.69	6570.86	7119.13	10671	11707.7	7216.1	6130.27	4681.09	2919.26	13695.2	3351.76	13236	9690.92	9434.83	24217	7566.63	3429.61	8166.22	9097.67	10090	6557.53		10625.8	3637.05			11247.3	4255.56
A0A0J7KFM2	ANK_REP_REGION domain-containing protein	5115.84		6383.46	2635.88		7099.5	7058.42		7221.87		3575.78	6034.05	8022.63	4252.09	5133.36		6873.19	2990.5	24280.8	15978.1		3074.29	5161.55		9246.76	6200.23	10643.3			6143.14	4616.4	7917.12			10131.7	10772
A0A0J7KFM4	Neuroblastoma-amplified sequence	1797.15		645.559			714.028	1632.56		1304.16		1091.61	1668.18	609.453	1330.02	432.989		1223	631.706				658.373					932.67								1163.93
A0A0J7KFM8	Vacuolar protein sorting-associated protein 13a	5875.89		4749.22	16956.7	22898.9	6819.58	5026.82	21331.4	5890.55	2548.01	7574.44	5333.32	8249.56	5865.58	7513.29	23066	14698.6	5241.06	18365.6	23091	2592.27	7703.66	6953.69	21263	18644.5	12757.8	14340.1	7365.08		10814.3	9125.42	6596.5			13039.3	17650.5
A0A0J7KFQ1	Tm2 domain-containing protein (Fragment)				49342.1	68921.9	4047.46		66572.5	1433.69				1180.13			136218			158302	55589		4570.83		38370.3			4402.32								1150.86
A0A0J7KFR1	Exportin-1	4639.04		6042.47			3807.24	2043.87	4162.05	2275.36		4276.76	5611.84	4011.38	4496.18	2961.28	5376.08	3303.9	5042.98	8444.56		4668.69	5299.43	1804.93	3288.91		8404.3	4682.04		2740.04		5629.26	4577.6			1216.95
A0A0J7KFR2	Arylsulfatase j-like protein (Fragment)						1184.87				5625.26		1711.81		2012.26				956.798										3254.63							917.547
A0A0J7KFR6	SURF1-like protein	2051.14		1300.56			1265.94	1475.69		2278.92	569.872	1600.82	1752.11	1191.34	1114.36	2066.92			1860.69	4314.23	1037.84		1380.76					1816.28				2293.76	3032.98
A0A0J7KFT5	Serine threonine-protein phosphatase 4 regulatory subunit 4-like protein	7369.38		13973.6			6489.48	10264.8		9922.81		9656.49	6273.46	2844.6	6203.27	4047.85		3065.08	6625.94	2310.23			4138.61	7712.87		7272.99	7712.17	9079.06		20295		6876.37	15550.5				6836.46
A0A0J7KFT9	X-linked retinitis pigmentosa gtpase regulator-interacting protein 1	33083.8		84345.9	2517.05	3215.03	27613.3	26934.4	9726.27	41244.2		39129.1	26476.4	24211.8	27976.5	21776.8	5551.91	26179.5	33937	21978.5	15175.2		32800.1	14499.8	5430.9	21394.4	17493.3	31923.9				27139.6	77345.1			11076.2	22530.4
A0A0J7KFU3	Tetratricopeptide repeat protein 27	11347.3		5087.5	10081.5	17891.8	8868.03	3916.58	14403.4	5192.98		9006.49	15070	12633.1	9061.34	15650.3	16683.9	16288.7	10576.5	14854.5	18723.4	13100.7	14080.1	48624.9	11177.3	20143.2	27800.7	11215.8			26339.7	18506.8	11191.3			51999.6	13667.9
A0A0J7KFU4	Putative histone-binding protein caf1-like protein	8197.78	3217.72	5889.84			1309.53	6639.74	13561.2	21528	1799.29	2006.58	22844.6	5929.51	4688.98	1315.41		13586	2300.91				5502.97	624.378		28635.7	1487.05	1805.15				16020	6750.17			3035.44	3195.71
A0A0J7KFU7	Isocitrate dehydrogenase	2154.23	3776.66	6880.79	1701.93		2021.6	1959.93		967.923	1774.67	1072.3	1213.84	3042.66	4410.06		2434.48	3231.68	2391.13	2785.91	1669.97		2931.23	2506.12	1058.05	3913.05	2468.63	3247.19				1266.13	2866.63	1402.35		1218.08
A0A0J7KFV6	Eukaryotic translation initiation factor 2d-like protein	349.267		1301.62			110.474					233.762	477.18		394.335				478.383
A0A0J7KFW6	Alpha-glucosidase		5456.33	899.746		2762.43	3449.38		11720.1		34557.2							2849.02		1533.51	1246.46								50678.2	151900	72160.1		3807.18	27391.7
A0A0J7KFY9	COP9 signalosome complex subunit 4	1307.86	2007.71	555.396	1138.41	1693.82	827.197	532.205		680.71	979.721	1272.45	1180.2	557.879	911.573	561.879		1377.75	791.412	990.729	1366.2				1382.5		602.016	1384.82								1526.9
A0A0J7KG00	NADH dehydrogenase [ubiquinone] 1 alpha subcomplex subunit 10, mitochondrial	108370	4833.2	312020	4723.75	6111.11	92296.2	124546	47613.2	111756	5057.16	94498.7	106411	138801	91180.7	109971	12616.9	90017.7	74584.6	71221.6	17546.6	6100.04	108215	56040.7	7039.69	122791	105089	123895	5574.27	3105.15	58810.3	94984.5	77625.9	11943.2	247295	62196.1	152395
A0A0J7KG13	Short branched chain specific acyl-mitochondrial	5723.2	10685	10311.7		6339.01	4172.31	8471.77		4992.42	16888.4	5403.14	10072.1	3690.15	6644.07	4452.02		4838.56	7913.66	6040.12	3572.29		7603.56	4509.72	5567.6	10604.3	5074.74	8227.32	2787.64			6934.34	4275.27			6282.5	8542.82
A0A0J7KG18	Tata box-binding protein-associated factor rna polymerase i subunit b-like protein	14251.6		31435.8			11560	22982.9	1240.28	17858.5		8899.33			3142.69			1220.22	10859.8				15586.2					2341.7					21359.4
A0A0J7KG24	DnaJ homolog subfamily C member 22	123.505		280.44			292.308	113.531		133.227					339.694				381.291									163.312				421.797
A0A0J7KG30	Cilia- and flagella-associated protein 91	8704.39		16793.8			8417.69	10960.6	7354.32	11787.6		9406.88	6387.49	8954.81	7629.52	13563.1	4926.07	8458.21	7292.88	5913.22	2215.94		10204	8493.87		10162.6	9785.21	12095.9				5601.99	8360.27			8258.77	12153.1
A0A0J7KG44	Secreted protein	40013		37847.1	3070.57	3473.41	33233.2	22199	12158.7	33420.1	1511.96	37302.3	30397.7	53557.1	12017.4	45626.5	14179.9	34640.8	23525.4	35439.6	14794.1		31730.1	25208.5	4138.9	36096.7	33276.3	40326.1				28739.4	26525.9			36379.2	42935.3
A0A0J7KG59	Adenylosuccinate synthetase	908.962		2017.66			1192.68	453.46		614.265		1443.57	1316.49	636.097	1219.59	1472.91		2392.65	1393.47				1878.9	1740.19			1061.17	1131.29				1537.29	2436.08			7837.86
A0A0J7KG62	Spermatogenesis-associated protein 6-like isoform x2 protein	2662.93		4312.73			1690.22	3180.11		2934.71		3663.23	3208.21	4921.27	1605.52	5132.27		3290.73	3258.94				2547.53	3594.56			6384.96	2074.93				3046.57	4719.49			3807.58	4095.51
A0A0J7KG67	60S ribosomal protein L14	19638	5688.06	8829.63		2853.85	14326.3	4546.23	8752.14	3321.16	5759.61	16792.3	29626.5	15961.2	21500.7	14845.7		6694.66	23530.6	6196.77	5231.78	45051.7	33708.8	8747.34	4041.91	9198.92	13766.1	8480.5	6354.48	2881.39	12127.1	22902.1	6066.38	769.006		6929.82	10533
A0A0J7KG79	N-acetyllactosaminide beta--n-acetylglucosaminyltransferase-like protein			506.684				479.699	14681.1											15082.1	5894.97
A0A0J7KG82	Coiled-coil-helix-coiled-coil-helix domain-containing protein mitochondrial (Fragment)	44310.7		40506.8	4178.27	6454.4	35270.4	32295.4	25249.7	40892.7	22163.8	37574.9	31869.7	40279	36442.3	44732.6	7235.42	27179.8	31259.4	27746.7	41228.7		30348.9	18376.6	38873.8	30224.7	56347.2	41429.3	23956.9		8887.9	39193.9	34240.6		113353	39878.3	27468.2
A0A0J7KG84	Alanine aminotransferase 2	633.261		2247.66			507.158	276.169		264.396		443.44	778.008		463.299				883.445													675.278	869.031
A0A0J7KG87	40S ribosomal protein S21	3763.13		3137.82			3422.72	1225.36		688.33		2666.7	2817.18	3902.5	3167.85				4350.07		635.03		1096.97	2528.23				1553.71								5262.4
A0A0J7KG90	Kielin/chordin-like protein	1333.48	3705.57	1615.93			3684.55	1354.03		1220.01	31594.2		3474.85	1833.96	1844.69	4123.7	3362.18		2345.51	3500.08	3659.12		4828.35	3169.03				3121.52	8311.03			4667.74				1869.73
A0A0J7KG97	Cytochrome c oxidase subunit 5A, mitochondrial	260207	10757.8	274700	8044.24	7272.04	306654	485326	97736.9	473376	9346.01	337004	127295	239653	360972	256464	24304.3	146466	230399	113965	44265.8	11838.7	231196	164649	12947.7	84937.5	191416	255870	5741.78		47365	156921	185637	7316.27		95204.5	154472
A0A0J7KGE7	Trehalose-phosphate synthase	3191.75	214855		324455	7625.69	4821.44	588.523		2697.31	11338.8	26628.7	1832.74	4927.39	12370.6			42495.9	1949.23	10401.7		15359.4	11381.7	21176.4	16004.9	20654.9	4399.29	7033.86	78763.1	19050.1	41707			145326		4049.72
A0A0J7KGE9	RuvB-like helicase (Fragment)			155.959	2999.28	2679.3	1697.28	1507.21		1557.55		2215.53	1957.09	1508.28	1841.58	880.867	2955.4	1260.86		3410.36	2571.55		2288.26	964.814	2407.78	2823.43	1034.08	2096.82								1164.07	1522.66
A0A0J7KGH0	Atrial natriuretic peptide-converting enzyme (Fragment)		733.046	1861.76							3136.76											7297.55					2513.82		573.78							1197.56
A0A0J7KGH1	Ubiquitin fusion degradation protein 1-like protein	1540.56		1511.28	4518.85	8680.48	2248.37	2100.26	2990.07	2416.32	431.817	2454.33	2642.63	2730.13	4280.98	1505.32	9841.4	6140.7	508.509	4359.63	6136.89		2936.46	632.276	8348.61	3505.61	2166.12	3583.71	606.985							1402.77	2504.7
A0A0J7KGH2	Myosin heavy muscle (Fragment)	42751.5	11588.6	3718.25	5833.4	5910.16	2385.42	1282.22	2098.08	3051.16	5683	7148.55	54741	3310.31	2717.54	5693.2	17107.5	2043.04		17647.6	2486.43	45142.3		1520.11	4928.42	37077.3		8950.95	5745.65	6895.08	22378.6			7881.19	86211.4	3162.57	10708.4
A0A0J7KGH4	Annexin	29072	12832.5	24224.2	3821.21	4028.56	50440	21187.2	25492.4	10047.9	19373	26994.9	48535.3	26867	55845.3	45466.8	9936.67	23261.6	37266.8	24145	12506.1	104579	54486.3	49139	5228.23	30587.5	43251.6	30895.4	23530.8	7503.74	41811.3	43292.3	16965.7	3996.14	36423.3	44340.4	24978.7
A0A0J7KGI2	Tumor suppressor candidate 3	1810.89					2109.59	665.617		731.517	1593.96	939.586	1899.7	2450.63	2871.8	2431.78			1333.38				2886.35	1566.44		1695.04	2561.64	1673.18	1376.35			5988.31
A0A0J7KGI9	Moesin/ezrin/radixin homolog 1	5332.23	3536.38	14470.3			4419.14	1526.56		1772.43		21384	6296.35	2868.05	5048.81	3699.8		7110	15095.1	2289.57	540.32	4851.82	5207.89	1000.51		4682.2	7222.73	3841.54	4259.46			9314.93	21993.2			6183.25	4619.37
A0A0J7KGJ7	Acyl-delta desaturase	2558.47		13184.6			2595.14	1982.68		1724.94		2667.84	3558.99	8879.95	3667.12	2868.88			3689.18				538.524	945.307				1396.87					15293.1
A0A0J7KGK5	Secreted protein	377.576		1204.72				488.413		307.718		386.547							244.102
A0A0J7KGM4	Galactose mutarotase			999.466																													266.945
A0A0J7KGN2	Apolipophorin (Fragment)	103508	36424.2	284836	3873.47	5975.83	171489	94796.8	205769	52942.6	92834.8	172283	236458	118766	241080	79241.4	15548.6	75672.9	277741	182216	51340	125390	637866	109952	21060.8	76144.5	57104.4	159487	64436.2	15011.5	65524.7	545222	283977	22459.6	302428	34778.1	47234.5
A0A0J7KGP1	Prostatic acid phosphatase	1274.15				1713.59	3007.47				2487.29		1409.29		2758.92	1063.29				6071.85	1596.78	2419.82		4502.18					3506.18	11091.8
A0A0J7KGR6	Gs1-like protein	204.369		850.586		1340	359.992	135.439		404.987		600.915						818.407	283.994					179.809									710.927
A0A0J7KGT4	Protein casc4-like isoform x1 protein	829.135		1051.04			952.988	1035.61		1224.25		1282.13			899.307				1481.53				1036.88
A0A0J7KGX6	Dynein light chain	1104.17		1100.48			1289.35	1111.08		959.473		785.584	451.788	1147.84	537.844	1302.17		1014.29	369.862		819.428			1419.25			1068.84	1005.49								1951.15
A0A0J7KGZ8	Mitochondrial 2-oxoglutarate malate carrier	144373	7475.86	648046	4769.47	5232.91	153078	258161	55820.5	279185	10694	280338	65295.8	34131.3	144052	21333.5	9353.03	65254.4	380008	62998.1	9749.97	4843.6	116762	42507	7765.45	42423.3	63531.3	118710	2846.07		37095.1	86316.4	741382	68030.4		25239.6	30460.7
A0A0J7KH02	Fatty-acid amide hydrolase 2	3443.1		5998.5	1621.32	1607.85	3443.19	3720.39		2071.14	1669.77	3321.15	3421.41	5710.58	5450.94	6247.94	3869.58	3941.6	2176.85	5028.41	1940.8		3298.39	894.041	3390.22	8127.26	6558.25	4256.19	1702.2	2277.29		3609.72	8364.17			2555.07	5654.73
A0A0J7KH05	Heat shock 70 kDa protein 4l-like protein (Fragment)	16031.4	5899.92	30091.6	8767.11	7879.31	19784.7	13060.5	10207.9	10641.1	6165.93	26180.4	15935.5	12495	16948.7	15671.9	17273.4	15051.2	18795.6	14291.1	13584	25875.4	13668.4	8921.35	9815.59	13344.3	9599	10234.9	10119.6		7277.3	14138.6	14430.1	2289.06		4403.09	6555.77
A0A0J7KH15	La-like protein (Fragment)	3149.79		2621.88			2161.55	739.698			988.493	2565.55	2826.18	992.702	2309.75	1525.26		1437.08	1895.73		2777.79	3259.4	2957.8	1233.8			2570.51	2006.1				4972.76	1859.86			1817.88
A0A0J7KH38	Cop9 signalosome complex subunit 5	509.755	858.876	765.607			193.489	169.16		299.857		629.517	188.584		304.394				523.219													421.55	748.663
A0A0J7KH57	Putative oxidoreductase dhs-27-like protein			733.43			1388.64					2244.65			743.889				442.256				1049.82
A0A0J7KH60	Camp-dependent protein kinase type ii regulatory subunit	65865.8		80500.6	4611.62	5611.37	48587.9	49623.4	15216.4	49258.7	2624.21	50839	39175.4	56380.5	29528.1	52008.9	6788.27	43305.9	49565.4	29430.4	10176.7	18804.1	42992.3	20807.3	6997.54	41330.2	40187.2	61695.1	2566.43	5075.76	21757.4	54024.8	123591	5969.5	102744	23922.1	31131.4
A0A0J7KH65	26s proteasome non-atpase regulatory subunit 11-like protein	5788.95		5396.25	11107.3	11603.2	5084.02	5701.49	7495.52	6310.13		7530.31	3531.56	4193.68	4280.03	8976.91	10714.2	9551.51	3895.71	9304.68	13222.7	3096.14	2953.95	4497.76	6703.32	5981.42	6808.06	4440.38				5335.12	3415.52			23228.2	14049.9
A0A0J7KH83	DUF667 domain-containing protein	3326.76		20253.2			2643.07	3396.77		1997.69		1808.74	1744.95	6572.11	1198.74	3047.25		1924.09	2863.75	985.429			1913.41			1956.51	991.649	4225.97				2096.63	4555.29
A0A0J7KH96	Ribosome-binding protein 1 (Fragment)	1347.89		1979.32			808.772		6099.77		2869.49	1237.48	1916.06	745.152	851.874	681.128			1590.12	1123.58	1268.89	1644.94	1659.04	647.978			1179.75	936.381	2169.64			2365.01				1037.11	2121.48
A0A0J7KHA6	Rna-directed dna polymerase from mobile element jockey-like protein (Fragment)	295488	8231.39	5782.15	12690.2	5159.53	98457.5	40049.3	189557	16080	18105.7	166474	449299	148986	448546	70222.9	30601.9	193460	269728	155596	88376.7	47079.2	375812	454028	34057.6	114902	172300	111786	14879.3	3262.29	148396	199081	40611.2			184719	142138
A0A0J7KHC1;A0A0J7MNB2	Cytochrome p450 9e2										1801.76		1081.42	1183.29	995.706				587.453				2811.57				2022.94		1541.91
A0A0J7KHC7	Methionine aminopeptidase	455.734					302.084			143.443			363.87	381.886	212.761				423.017
A0A0J7KHC9	Aldehyde dimeric nadp-preferring (Fragment)	18168.9	2594.22	3598.33			7661.71	3304.09		6918.69	4931.71	13224.4	22260.4	10530.7	12602.5	12296.7		9061.55	20838.7	4718.79	3237.32	6125.38	27224.5	4253.72		7481.35	8226.53	5237.23	6413.09		11359.3	22462.9	2315.09	1917.03		5512.44	8895.64
A0A0J7KHD2	L-fuconate dehydratase	2541.29		1347.11			1853.15	668.671	9578.29		3203.39		5168.13	1583.45	2526.86	611.42		3297.58	1373.72	6181.38	2831.03	7790.11	4740.69	5958.44		2263.44	2158.55	1548.79	3900.31	5356.71						2966.36
A0A0J7KHE1	Phosphoserine phosphatase	2213.72	4505.55	1788.22			4023.18	1528	7382.82	520.395	6842.47	2117.59	5707.36	2114.84	3422.21	2370.38		2584.57	710.112	6086.94	6795.17	2969.49	9181.66	3515.26			6379.31	4980.95	14253.4	3054.91			1481.06	5791.45		8176.49	5076.29
A0A0J7KHE2	LanC-like protein 3	3008.76		4470.28		2636.76	2696.31	2473.79		2725.69		2718.69	1410.11	1418.21	1516.78	4367.89		2655.99	2543.84	1537.46			2435.99	356.227				2425.53					7181.12			904.301
A0A0J7KHF7	Alpha-mannosidase 2-like protein	640.916	1530.5	545.009			642.529	553.893		261.611	802.194		492.56		1029.97	828.751			1052.66													2056.44
A0A0J7KHH4	Glycogen synthase kinase-3 beta isoform x2	10309.6		5942.07	3731.07	4295.52	9446.43	10279.7	9516.33	7503.55	1385.98	12549.1	6722.86	5992.55	4898.67	4682.43	5080.33	9452.7	9072.78	8196.95	4151.62	3259.85	4763.9	2581.48	5686.39	5045.79	9073.8	8600.98	1794.26			10055.2	20398.7			1308.11	5326.6
A0A0J7KHH7	Mitochondrial 2-oxoglutarate malate carrier protein	68252.5		95001		2248.03	68709.4	48978.7	31278.9	78973.9		63063.2	43663.2	73477.5	55586.9	74773.6	4168.85	54516.9	59669.2	50175.8	16942.1		65933.7	64992	3519.71	40511.6	31228	90017.8			13538.8	30806.5	75863.9		60645.8	62277.8	35652.2
A0A0J7KHH8	60s ribosomal protein l10a	5893.4	3629.72	4239.43			3126.78	1260.61		1345.22	5346.7	3555.7	6167.44	4804.03	2520.81	4969.49	8406.18	3923.18	7010.25	3545.63			4504.53	18738.1		12747.7	5305.54	4346.61	2125.25	9875.67		4579.58	7581.71			22043.2	4529.25
A0A0J7KHJ3	CDGSH iron-sulfur domain-containing protein 2 homolog	400.58		1654.34			532.068	483.358		209.425			307.887		493.811				732.678				510.39					468.801				923.078	272.957
A0A0J7KHJ8	Neurofilament heavy polypeptide	60006.5	1398850	123767	176232	476878	74462.9	147754	370696	49920.7	6960070	57044	83460.5	88235.9	46782.2	73883.9	309159	63030.4	80408	268774	195677	266722	94894.4	95803.7	257055	113302	95961.4	160748	1965300	2866190	118814	133522	67423.9	464499	1435130	318719	161709
A0A0J7KHK2	Papilin	1506.53			540.926						4706.05	763.748			1320.33														807.572
A0A0J7KHK4	Thioredoxin	16462.8	4699.3	36564.4	1038.83	2607.8	25898.2	14846.6	12473.9	15261.2	3025.73	17749.5	5552.82		23793.8		5353.61	4413.9	38135.3	4648.74	5776.24	18441.3	25104.5	3635.1	6807.16		2640.22	7078.67	5702.17			11335.9	9921.73
A0A0J7KHL4	Leucine-rich repeat-containing protein	12899.1		12788.8		1292.09	10188.6	11683.9	4406.44	11415.6		14726.5	14616.4	12247.1	12285.8	16426.9	2578.61	12588.2	8722.41	11764.5	4504.57		13790.2	10169.9		15343.5	12463.9	16203.5			4921.72	13787.9	14330.4			9497.72	6267.47
A0A0J7KHM5	Atp-binding cassette sub-family d member 3-like protein	115.007									886.659		388.291		127.698
A0A0J7KHM7	40s ribosomal protein s30	4294.08	9024				6015.2	1582.04		1225.93	5891.64	2950.77	5134.04	1455.02	3453.86			1986.38	5208.12	4397.18	3544.96		6250.89				823.057	2957.36	4431.19			6059.74	1129.16
A0A0J7KHN1	Ring finger protein 11-like protein				4399.17	9594.85	925.361	1548.69	5539.68	1399.6		656.026			119.858		4324.98	821.048		3002.72	11018.4				5291.41	1087.13		689.844
A0A0J7KHN8	Ap-1 complex subunit gamma-1	2777.59		9744.95			3093.74	1888.5	12760.9	1413.18		8070.73	18480.5	9296.96	8314.6	3982.7		1843.07	6853.35	8321.41		40453.9	7468.27	8994.16			8427.85	4041.43				8635.9	11060.6			18040.9
A0A0J7KHP0	Fatty acid synthase	4420.91		550.764									595.803	563.389	707.251				2398.67
A0A0J7KHP3	Tektin (Fragment)	38040.9		45986.3		1433.54	27217.3	29520.1	16284.4	34655.7		44332.7	21643.7	29268.8	24099.2	33555.4	7467.64	26043.6	34510.3	25222.5	8691.01		30692.6	39934	2288.87	18396.6	35692.9	32109.8	10766.8		18065	21584.9	58365.3		27442.7	57179.9	42562.2
A0A0J7KHP9	Plastin-3-like protein	4486.89	10370.5	6224.37			4745.7	2685.69	8218.84	3027.37	4546.5	4241.53	6308.17	4884.17	7503.03	6316.6		4508.98	8582.75	4774.19	2909.37	7699.73	6113.08	3585.58		6958.24	4279.68	4708.32	6715.44	6028.93		7703.06	6191.39			4757.57
A0A0J7KHS7	Arginine kinase	79491.3	70587.6	131439	98483.2	146776	137870	158889	209752	153262	196219	241589	77110.5	42004.3	122208	67753.5	138281	216744	125426	179774	181793	103779	324285	26604.6	151105	188279	139971	118511	150671	68357.9	157262	128840	124285	27560.2	111587	97351.4	114604
A0A0J7KHX9	Protein fam92a1	1626.92		2201.26			1476.87	1470.13		2066.34		1751.21	1007.96	834.914	1123.9	2080.84			1957.9					1423.51				1037.02				931.086	2231.17
A0A0J7KI07	60S ribosomal protein L35	3758.05	3336.1	1625.17			1464.65			904.922	1237.18	2076.9	5852.87	3509.99	3042.6	2955.02			5070.05		702.321	4512.36	4719.58	9636.01			4593.87		1036.5			4798.4				10615.5
A0A0J7KI10	60S ribosomal protein L23	8607.28	13444.7	25589.3	1781.91	4591.95	14752.2	767.376	6001.69	1175	11049.3	4079.42	14509	8391.19	13145.6	4917.17	37668.2	11406.3	3356.21	8871.98	6998.32	4975.03	18830.1	14703.4	3574.94	9239.76		10334.2	7017.52			2420.64	710.085			10528.3	4387.88
A0A0J7KI14	Hrp65 protein	543.356	6355.75	601.07	598.543		1852.49	590.057		495.755	19882.8	1019.55	1846.25	1883.9	1824.26	1858.9									535.428			256.229	1637.93
A0A0J7KI30	Isoleucine--tRNA ligase	1177.36					1206.82	446.634		464.099		1655.09	599.902		1500.11				1321.24				976.264									291.089	1620.74
A0A0J7KI37	RT_RNaseH_2 domain-containing protein											11119.9
A0A0J7KI54	Acylglycerol kinase, mitochondrial			292471																							76019.5										109088
A0A0J7KI67	Ras-related protein rab-11a	9420.32	17910.3	3381.29	28414.6	7347.24	5660.16	3155.18	8756.71	3808.09	13542.8	5434.71	9573.81	7733.95	8151.93	8397.16	11483	9008.26	6429.91	6940.38	6117.14	14291.7	11990.5	7146.15	6142.63	23563.2	6638.77	6403.51	10189.2	30253.7	14261.6	6052.21	2983.09	7305.83	18615.3	7951.46	10784.6
A0A0J7KI69	Tubulin beta chain	119763	26110.7	332852	40890.4	23727.3	127036	202816	187081	52857.6	10865.3	142178	43590.7	20263	81576.3	90363.5	126353	148664	146104	145372	59121.5	9541.06	154599	251903	68880.2	118548	126002	66728.4	7335.15	5217.44	106935	230276	279147	13027	1898800	224921	337423
A0A0J7KI70	60s ribosomal protein l7	15019.7	7223.86	10448.5	942.862		14924.2	2872.76	4408.58	2866.79	6958.1	11115	13293.2	12160.8	12402.4	8868.04	2292.22	7602.59	17914.7	8504.37	4005.4	22095.8	17270.5	8805.28	1525.15	6698.35	9274.23	6486.31	7111.72	3461.23	9660.1	9507.39	9165.64	746.97		5497.08	7382.28
A0A0J7KI88	Ubiquitin-associated domain-containing protein 1 isoform x1	12092.8		8029.83	16451.4	22092.7	19776.5	10733.7	32347.2	12821.8		20633.4	4344.92	6900.82	6657.46	3671.44	28538.3	17548.5	6844.61	18825.3	47390.8		4165.65	4632.39	31992.4	12678.7	7052.95	15795.8			9488.85	10892	13963.6		33763	4406.82	8469.4
A0A0J7KI95	Nischarin	1213.7					909.787	629.634			803.953		1995.37	882.106	1799.8	533.291			548.975	1794.73			1289.89	1990.01												1793.84
A0A0J7KIA4	Elongation factor 1-alpha	7008.24	4142.79	15625.9	7881.38	8862.98	6415.99	5690.16	9836.06	3114.38	6805.5	6791.71	10644.8	16158.5	7890.65	7111.99	11851.7	5110.71	5535.54	9396.55	27516.1	31492.4	7736.52	2683.27	10690.6	9070.82		5858.33	5591.58			4482.81	60021.8			5882.72	6259.08
A0A0J7KIB2	Pre-mrna-processing factor 39 (Fragment)	34.6903		275.069				10.8292				125.27	114.702						182.287														415.25
A0A0J7KID4	Flavin reductase	1563.06		777.107	1285.65	3112.94	888.606			431.337	1992.03	834.692	1215.94	1278.27	1440.28				774.53		2084.54	13726.7	2033.22	1824.72	2002.73	4054.2	2737.5	566.456	4573.41			1847.28				1406.14
A0A0J7KID6	Glucosamine--fructose-6-phosphate aminotransferase (Fragment)	1081.19		1424.63			1042.52	523.52		824.776	1629.74		729.438		1343.27				1157.71			4159.86
A0A0J7KIE6	Beta-mannosidase	732.374		750.057			691.03	247.212		429.122		517.322	176.934		549.929	450.552		571.389	499.777			1567.86										759.355				1137.66
A0A0J7KIF8	Carboxylic ester hydrolase			1858.57			544.295	349.143		2063.75		1896.71						1725.26					736.868											3742.2
A0A0J7KIG5	Chromatin-remodeling complex atpase chain iswi	533.754					439.483			450.086		613.72	1124		1020.14				522.635	1550.46		1267.89	1666.01														807.751
A0A0J7KIK4;A0A0J7NCR2	Protein lin-7 homolog	100981			5767.12	11122.2	116539	22049.1	92859	85604.6		74914.4	100637	148387	146002	60040.8	33381.7	278897	44424.6	223462	75752.6		197647	291351	11472.6	282603	291086	317632			122757	57142.9	87373.3			367355	383355
A0A0J7KIL0	Ras-related protein Rab-21	1557.44			2894.26		981.575	361.234		595.583	752.944	1458.97	1805.11	809.727	851.302	883.967			810.558	2308.27	977.578		1472.97				705.988	1335.56				1528.96
A0A0J7KIP2	Leucine-rich repeat-containing protein 48-like protein	15275.5		14514.6			14486.8	15940.8	6073.37	14686.4		14066.3	12070.5	18579.5	14376.2	15929.5	2153.18	15798.2	11737.1	12705.9	3553.7		13996.3	12467.2		17741.7	18004.3	21035.2			10896.8	15815.1	17655		88205.8	15937.9	15976.1
A0A0J7KIQ0	Transmembrane emp24 domain-containing protein	1181.71		1923.94			575.346			327.829			812.742		725.494	479.145			1324.9					798.935
A0A0J7KIR4	Malate dehydrogenase	29806.3	15641.2	44913.6	15371.6	18625.7	44089.1	22364.8	30788.9	19110.3	36464	35040.9	33228.4	26580.1	36252.6	17541.2	22521.1	26710.9	53081.1	26649.6	45366.8	35006	32329.9	17199.4	20324.2	29803.3	24649.5	24198.4	14809.5	5323.33	40895.4	43564.4	50302.4	2782.98		40286.1	29562.7
A0A0J7KIR8;A0A0J7N0Z7	RNA-directed DNA polymerase															2090.5																1262.51
A0A0J7KIS1	Putative e3 ubiquitin-protein ligase herc4	1457.33		5613.83	2477.5	3146.39	1592.23	990.206	4987.67	1986.33	566.269	1798.65	1505.61	1987.09	1601.19	2043.02	2787.39	1894.33	2731.44	3370.45	2779.58		2432.3		2426.68		4581.03	1949.33				1460.84	2723.98			2018.06
A0A0J7KIS8	Aspartate aminotransferase				20638.2		2888.38	1678.43		4413.22		5166.27		1090.08	966.109			18594.9	12298.7	6565.62	12944.6		589.952	866.205	25874.9	26095.4		19563.1	14609.5	6255.36		1590.1	41156.6			647.122	25241.1
A0A0J7KIT8	Complex I-13kD-A	3570.89		3845.33			4853.29	8577.45		5244.73	552.027	3967.09	5347.98	6316.77	5730.08	3901.5		4680.35	1977.92	5380.01	2602.59		8006.46	1547.91		7317.11	3937.06	8783.6					3110.91			2494.95	5763.5
A0A0J7KIU3	15-hydroxyprostaglandin dehydrogenase (Fragment)	3721.74		3230.14			5883.13	1655.42	8656.75	497.783	3103.69	2137.81	4663.05	2662.81	13117.6	872.831		2164.98	2969.55		3582.94		2946.06	5134.54				2393.95	11303.2	6351.22		3866.39
A0A0J7KIV3	Mitochondrial proton/calcium exchanger protein	17316.2	10768	24768.5	3854.53	4877.59	17389.8	15708.7	11289.9	16880	3148.97	14191.7	15756.4	20174.7	14988.3	14631.8	3865.21	14948.2	14331.3	17723.8	6534.89		10678.5	9498.81	5367.22	19513.4	15425.1	29094.6	13032	18678.8	24819.9	11820.5	29395		69958.6	14817.4	27189.2
A0A0J7KIW3	Ubiquitinyl hydrolase 1	555.489		727.579			693.395	348.073		747.651		754.354	625.777		384.05			1212.41	994.968		2804.65	2964.67	1937.21	521.063	2318.16							1553.59				1113.41
A0A0J7KIW6	Coiled-coil domain-containing protein 96-like protein (Fragment)	7954.81		12507.1			5621.15	7477.38		9535.52		10393.9	3617.46	2769.05	4613.08	2622.2			8887.83		2002.11		4924.44	1774.64			5021.55	4032.37				6492.34	8591.43			7214.61
A0A0J7KIZ1	Dihydropyrimidinase-like isoform 1 protein (Fragment)	3357.62		2019.83			2694.23	608.129			3821.62	1558.42	3381.85	4200.87	3991.31	1713.5		2332.05	902.332	3250.33	2742.22	25239.8	6552.34	6244.32		4836.77	5189.71	4256.97	3926.16			2579.68	1612.9			10163.1
A0A0J7KIZ9	Atp synthase subunit mitochondrial	68335.9	6389.21	122771			40200.3	44393.6	22814.2	10775.1	10315.7	59892.6	65125.9	84088.7	44156.6	118780	9784.44	32535.7	85778.1	32715.9	8062.83	5720.05	51148.5	18072.3	4561.83	51428.9	55453.8	44258.3	10738.9			62677.7	49879	6052.98	224242	23362.7	67648.9
A0A0J7KJ01	Mitochondrial intermembrane space import and assembly protein 40-b-like protein	302.149		800.975			416.7	204.589		182.246	1842.27	214.245	548.338		456.957	575.787			279.292					3014.48			712.846	594.7	945.711							4777.66
A0A0J7KJ19	ATP-cone domain-containing protein	4928.86								819.525			1887.3		990.804	1713.99			781.427				1929.11				1785.09					2997.19
A0A0J7KJ24	Gamma-glutamyl hydrolase		16400.7	2864.13	5066.73	19832.7	2638.91	732.428	6271.93		67896.3		2417.16		2079.39		6856.05	2710.96	1303.56	20691.6	16955.2	5299.82			8647.35		2156.24	2250.53	6968.34	8979.9		3394.1		8967.02
A0A0J7KJ28	Alpha-glucosidase		14499.7	1077.19				1110.35		1187.5	19618.8		2976.95	11651	904.873					5892.34		3771.03			3332.37		1485.86					7603.64		5667.22			1649.18
A0A0J7KJ32	26s protease regulatory subunit 6a-like protein	6997.96		5664.44	16783.7	13246.2	6074.36	5435.1	21460.1	10659.4	1396.23	12464.5	3738.74	6031.88	5117	13632.1	14795	16088.7	6545.57	14770.2	21085.5		4889.53	8929.51	13308.9	15891.6	10464.7	7274.95				10826.6	7517.24			36951.8	11158.1
A0A0J7KJ48	Succinate-semialdehyde dehydrogenase	16157.4	2928.76	15838.4		1366.07	10342.9	20973.4	4365.78	14938.5		12701.7	11765.9	17970.9	10380.6	15371.4		5921.41	10284.3	5088.24	1775.45		10058.4	9309.51		8722.46	12848.8	13223.9			5465.07	21106.9	26478.6			8461.49	9938.57
A0A0J7KJ55	Dihydropyrimidine dehydrogenase [NADP(+)]	826.473					752.445					716.434	1218.73		763.676			1158.97	676.398				1660.65
A0A0J7KJ59	Xaa-pro aminopeptidase 1	4562.4		7197.71	2272.07	2389.28	9783.85	4349.84	8473.53	3897.87	25343.4	7299.12	8241.32	4303.98	8064.36	4357.87		9658.8	8239.14	12465.8	8980.49	4929.16	9287.33	6399.8	2735.04	4087.24	5377.67	5993.15	3557.23			11711.6	6051.08			6467.67	9780.13
A0A0J7KJ73	Saccharopine dehydrogenase	1089.32					625.322	767.506		516.717	872.286	1380.79	2587.09	1251.56	1055.97	1457.28			1875.77				2539.39									2207.15
A0A0J7KJ88	General transcriptional corepressor trfa-like isoform x1 protein (Fragment)	12338.2		24585.6	933.666	5599.71	18595.1	13285.1	8519.56	29517.4		10265.2	8301.93	14372.6	15765.6	15392.4	4099.02	14850.1	5498.29	16254.7	5779.32		11789.7	4842.15	2181.15	14651.3	9497.38	15376.9				6321.16	4449.63			6263.23	13880.6
A0A0J7KJ90	Bee-milk protein			2010.39																												4806.49
A0A0J7KJC4	Myosin heavy muscle																					40154
A0A0J7KJD3	Mevalonate kinase	310.898		1028.06			678.651	360.628		689.97		536.435			276.335		1340.93	580.514										257.003					1260.43
A0A0J7KJD6	Melanoma-associated antigen e1	4287.9		10899.7			2719.18	3706.41		4407.34		3541.96	2605.46	2350.19	3987.96	2972.87			3542.27				3780.12									5282.94
A0A0J7KJE1	Carboxylic ester hydrolase	13927.7	15342.6	20112.4	1895.62		70672.3	9262.78	8694.92	4942.95	213422	16144	135279	25584.3	70873.4	16979.8	7818.73	37055.5	56743.5	120435	38968.4	3408.3	8014.37	71238.4	6279.56	8283.15	12008.6	29866.5	7941.1	4617.61	45891.7	29983.3	8268.49	15448.7		45643.5	22128.2
A0A0J7KJE2	Ras suppressor protein 1	718.042		1037.19			473.104	118.337				497.176	603.212		701.393				462.277				829.575				359.879
A0A0J7KJF0	Wd repeat-containing protein 78-like protein	69383.6		88562.7	4854.91	4118.47	74502	85936.2	16337.2	83960.9		71799.7	56536.2	68090.4	57393.7	69393.2	8167.57	61790.3	49336.4	49633.5	19698.2		59728	24747.1	3493.31	65046.3	33302.6	68996.2			21174.8	48939.5	58179.5		98425.7	43414.9	70905.6
A0A0J7KJF5	2-amino-3-ketobutyrate coenzyme a mitochondrial			949.184				240.628
A0A0J7KJF6	Transcriptional repressor p66-alpha	800.307		379.694			370.55	303.456		317.192			357.95	650.427	276.326	493.338		1125.45	292.822				584.921
A0A0J7KJG5	Calcium calmodulin-dependent protein kinase type 1-like protein	2610.38		2669.47			1340.4	586.848			3457.5	2264.94	3237.56	908.845	1460.72			1644.43	4168.07	3300.68	2297.85		2189.33	2318.75			990.724									1300.78
A0A0J7KJH9	Sepiapterin reductase	3508.26		5667.96			1523.23	759.363		305.832	321.197	1616.06	3060.72	997.329	2620.38	1034.98		1321.16	3511.69	2951.54	616.071	8307.82	4666.97	1843.77			1770.55	1644.73	1502.54			3168.9	5596.23			4401.85
A0A0J7KJI2	ATPase ASNA1 homolog	2161.03	2498.91	3627.14	11836.5	8433.38	1907.87	1827.07	13251.1	1672.77		1470.91	1756.14	1160.96	1492.11	1658.27	6484.18	4210.36	911.614	9440.02	7189.83	2501.44	2725.49	3601.96	6856.03	4850.27	5711.25	3580.45				2087.03	2306.46			3605.21	6468.28
A0A0J7KJJ2	RNA-binding protein 8A	1038.25		10780.7			1720.45	1198.18		653.889			1257.43	1469.47	1813.69				1167.73				1450.54				963.836	2018.86
A0A0J7KJK5	Peroxiredoxin-5	71025	6318.47	25065.9	247929	284636	50529.4	21716.8	314177	43642	13247.1	58060.9	30773.5	22887.3	33385.2	11022.3	367427	161911	28909.9	162593	248829	10477.9	93104.5	92210.7	207089	161569	13190.9	105745	9058.8			37235.6	57589.8			41975.8	56389.2
A0A0J7KJK7	Splicing factor 3b subunit 3-like protein	1271.78		690.687			551.616			681.804					482.402				181.615
A0A0J7KJL8	Fad synthetase	2969.44		7681.03			1114.71	2137.44		1922.55		1999.45	1726.35	1457.52	965.529	3557.83		1844.36	1951.67		447.01		1060.24	864.601		3882.07	2254.23	2390.09				3891.65	7691.81
A0A0J7KJM4	Aminopeptidase n			2293.68			574.719	1184.87		1365.22					769.592									795.543
A0A0J7KJM6	Adenylate kinase 7	42147.5	2441.74	147634			37733	65759.7	8065.64	68794.1	1539.5	64745.4	23063.5	6435.88	27822.5	5046.08		20758.7	61015.1	16814.5	2716.63		25671.5	5873.21		12175	6191.1	32470.2				19597	66890.7	2124.6		1970.53	4128.44
A0A0J7KJN3	Dihydrolipoyl dehydrogenase	478688	184871	991925	214853	887526	754884	977078	616924	937489	309625	1585510	312537	298984	525248	362266	986606	1913470	596218	2666960	1470330	18866.5	368774	234881	850204	1222900	235852	998889	47726	19537.3	403971	414207	852498	29028.4	637985	1656270	727607
A0A0J7KJP2	Ropporin-1-like protein (Fragment)	94870.9		141064	4976.11		64311.5	82850.8	21569.5	110986		103162	73815.9	86719.8	68383.6	63459	7992.35	55643.4	102506	33335.9	14696.5		86418.1	41544.4		58661.1	45446.4	58705.5			28792.8	102977	62223.5		99733.5	14568.6	57018.7
A0A0J7KJQ7	Voltage-dependent anion-selective channel-like protein	8686.58	4756.35	5321.45			3970.8	4380.08		5294.6	3189.38	6968.05	8992.6	9456.48	9316.41	10809.6	4815.19	6526.54	6289.48	11523.8	1441.96	10532.1	8464.68	6024.47	1754.09	9340.51	6873.83	7202.76	3999.26		5553.03	8493.59	3538.5			8773.72	10290.3
A0A0J7KJS1	Carboxypeptidase d	4051.66		3158.86	2247.8	1215.45	1301.8	4783.82		2401.08	2152.56		6873.25	2037.91	3036.51	3285.99			5032.78	5692.13	3229.73	3262.36	2949.57	1858.44	6960.35		6180.96		1249.77			11350.5
A0A0J7KJS7	Putative chitinase 3-like protein		3002.83							388.098	6874.38																		2397.31
A0A0J7KJS9	Heterogeneous nuclear ribonucleoprotein q	14843.8	5394.23	13052.9	4757.22	3146.15	14508.7	5392.09	3616.24	5087.03	7162.65	10385	19278.9	10892.6	17744.8	6100.32	4416.17	11110.4	11395.8	10301.7	8902.67	15529.8	27257.6	5712.38	4772.18	11240.8	6454.75	9121.79	5240.94		16234.3	22440.9	5400.54		36033.9	5721.41	10361.9
A0A0J7KJT5	Methenyltetrahydrofolate cyclohydrolase (Fragment)	39389.2	2344.5	205885	988.499		16540	17743.7	33299.1	4130	2874.57	40995	36856.3	7028.76	53377.2	5855.9	1969.71	19124.1	114048	11885.6	3796.44	13177	24139.4	21830.1	1766.42	9251.66	23499	14563.4			9708.73	33944.2	94011.5	3897.41		3515.96	4203.76
A0A0J7KJT8	Aminomethyltransferase	6212.52	14415.6	5613.25			3173.66	1574.86	3340.57	718.708	15040.7	3296.59	9987.01	3314.99	6818.59	2673.74		3869.73	6113.82	8890.38	1467.04	10956.8	6043.19	6276.08		3152.03	4240.1	2305.66	5460.13			3192.16	8595.79	2862.04		6665.29
A0A0J7KJU2	Aconitate hydratase	175859	18831.6	241630	12271.8	25852.9	202325	308932	95133.9	269780	64391.1	223262	223925	214374	187562	162190	30686.8	190891	185600	230412	76043.2	20306.8	223750	139582	21776.8	220220	196911	373458	17820	9501.96	190105	225878	258937		146368	173467	178812
A0A0J7KJU4	Hydroxysteroid dehydrogenase-like protein 2 protein	1858.62	1814.18				750.895				2219.6	1294.41	3235.46	1084.05	1225.82				1545.12	2104.06			1512.36	947.493					2116.22			1554.18				2459.8
A0A0J7KJU8	Wd repeat-containing protein 63-like protein (Fragment)	35137.4		24075.2			24805.1	20024.8	6567.48	31882.2		37251.4	31561.4	50995.1	29053.5	54158.5	3528.82	30626.1	25500.9	26170.6	8580.72		37530	26475.1		35179.5	24961.8	39677.2			12752.7	32241.4	23791.5			29346.9	47654
A0A0J7KJV2	Pyruvate carboxylase	25872.2	39896.3	15136.2			11794.4	7238.94		3519.86	60891.4	12723.5	33279.1	15056.4	22062	24899.8		7717.35	19837.9	74423.7	32088.8	418465	6894.02	19010.9		13406	18982.5	15385.2	203513			28347.2	17250.2	175765		25192.1	15018
A0A0J7KJV3	60S ribosomal protein L21	11830.8		10676.2		797.38	5623.55	2503.88	6384.32	1965.71	2920.03	8986.25	8393.51	2139.09	7013.76	1285.7		4922.44	8944.17	3731.42	1360.32	3522.81	9613.02	4282.89	2442.87	4333.83	4527.61	3611.26	2339.25		13979	8783.59	7147.64	961.136		2270.67	1231.68
A0A0J7KJY8	UTP--glucose-1-phosphate uridylyltransferase (Fragment)	8754.53	11214.9	7652.46	3813.74	4099.93	6035.44	2010.9	11520.2	1218.06	4562.44	5915.67	9760.9	8843.94	7935.59	4574.63	6403.64	5618.28	9641.05	10230	7142.56	11577.6	5070.13	10287.3	3038.49	7232.98	8642.91	4665.56	4730.94			8831.72	8548.46			20242.6	6090.39
A0A0J7KK00	Adapter molecule crk	569.345		2350.08			1247.22	674.906		386.654		514.075	1125.13	1691.07	948.352	362.262			626.645		1330.28		1464.18	3552.29			1551.06	1335.87				1044.69	1108.72
A0A0J7KK15	Aminopeptidase n			1848.18				387.921				820.098	2095.26		1961.59				1271.14					2000.62								3586.51
A0A0J7KK18	WW domain-containing oxidoreductase	175.739		473.978								164.721	219.112		149.614				129.793									394.423
A0A0J7KK29	Guanine nucleotide-binding protein g subunit alpha	747.609		2069.45			1041.4	466.002		626.904		692.902							621.27
A0A0J7KK42	Protein isoform b-like protein	732.318		1517.76	684.969		1446.69	1376.35		1640.21		1989.39	875.202	2056.62	1196	2724.15			1476.07		814.167		1575.14			2223.53		729.678
A0A0J7KK53	Structural maintenance of chromosomes protein 1a	625.031						612.228		606.504									369.549
A0A0J7KK59	Plasminogen activator inhibitor 1	7407.6	8404	10572.4			2463.69	3595.57	9439.24	1024.05	5558.85	5011.07	5005.35	2120.71	5650.24	4687.01	1649.13	1770.55	5495.01	5370.35	2666.47	47028.3	16485.7	5756.75		2011.7	12123.4	3835.35	5137.46			26579.1	13344.2	1340.53		7399.76
A0A0J7KK64	Golgin subfamily A member 6-like protein 22	1491.11																										545.213
A0A0J7KK65	Multidrug resistance-associated protein (Fragment)	500.827				3856.28	2544.46	148.265		445.143	13357.8	500.115	415.471			674.543		1616.43	392.538		1002.45								15618.3	20388.7		867.499		7532.32			1255.67
A0A0J7KK66	Antithrombin-iii-like isoform 2 protein	6634.75	4895.85	43213.3	3264.5	3018.39	11955.8	9239.43		5388.73	16905.1	10246.8	8319.06	5395.46	12303.5	7786.08		4051.54	11548.8	3758.79	3349.06	22662	11383.8	5854.5		4302.82	9665.71	5890.59	9019.05		23152.2	10524.1	27772			10254.4
A0A0J7KK75	CHK domain-containing protein	400.71		4113.46			1260.27	1046.15		557.957	671.791	1121.84	416.877		699.996				678.478	1357.31	1359.05		2868.12				2141.47						1978.18			2149.8
A0A0J7KK95	4-aminobutyrate mitochondrial										10310.4
A0A0J7KKA1	Calpain-a-like isoform 1 protein	3538.82		11834.1	19365	16061.1	6382.25	5674.15	7979.85	5054.27	1480.69	4456.66	5597.89	3864.36	7380.99	3728.54	16947.4	8138.11	2952.74	17077.4	9143.1	15577.6	9072.89	6230.8	12223.3	5905.26	5589.19	5254.76	2492.6			4223.54	1034.4			3991.23	5825.46
A0A0J7KKB6	UPF0160 protein MYG1, mitochondrial	8066.87		13370.8	14573.1	13209.5	11030.5	9818.27	22132.9	10823.5		11640.7	5347.96	7233.77	8393.2	4919.13	22689.9	19447	8503.4	15404.1	17152.9		10726.5	19812.6	16974.6	19328.1	18281.3	19135.9				8373.35	17190.9			23444.8	13626.8
A0A0J7KKB9	Exocyst complex component 7												269.348						244.997
A0A0J7KKC2	Peroxidase-like isoform x5 protein	258.166		282.518			189.887	163.907		108.981			1024.59	392.446	341.993				231.592													1490.7
A0A0J7KKC3	Isocitrate dehydrogenase [NAD] subunit, mitochondrial	2159.51		12677.5			2719.16	3687.47		1821.53	886.544	2303.76	2093.19	1706.98	4120.08			1290.27	4535.08	2453.9			2352.76	2061.18			2732.28	2604.1				2880.09	3431.87
A0A0J7KKC4	Not1-domain-containing protein (Fragment)	3537.51		4685.71				2065.6	5194.78				342.052		1271.66	5170.63		595.736	400.284	9423.17	1944.12						3534.79					5321.27
A0A0J7KKD4	Ejaculatory bulb-specific protein 3 (Fragment)	8639.37	6775.48	96204.9			11501.8	4554.63		2136.53	20299.1	21253.7	23190.2	4684.36	26484.7	3335.44		11624.4	28653.7	8586.75	7435.82		18334.7	17244.6		5916.41	8507.42	9072.24	27281.8			39967.5	4671.3			5432.33	8215.05
A0A0J7KKD9	Aminopeptidase-like protein	116690		221662	15237.4	7199.91	179049	128662	32989.3	133396	5998.42	90844.3	139314	226577	101816	169349	10919.4	118401	80665.5	152974	13886.6		147707	171586	21629.4	89501.7	123450	113627			98117.5	69281.1	94783.1		150065	176251	210679
A0A0J7KKE6	RNA helicase	534.655		947.721			939.156		6406.77		1057.85	703.9	3986.6	1018.11	3540.48				196.038	4831.27	3265.56			1625.76				2158.45
A0A0J7KKF2	Coiled-coil domain-containing protein lobo-like protein	4919.4		15999.5			4893.88	5552.83		7385.75		6280.75	3222.24	4225.71	2786.23	8408.25			6758.58	5811.5	2721.13		4634.43	1212.63		8297.63		3020				5431.07	24061.8			1685.88
A0A0J7KKF3	Neurobeachin-like protein (Fragment)			1416.09			379.189			188.006		593.394	423.603						746.305													524.53
A0A0J7KKG3	Chitin-binding type-2 domain-containing protein (Fragment)			1382.53		1743.47	924.014				3913.62		2469.05		1152.83		4458.72		1225.03	3184.38	1036.21	2306.02	1066.66		3089.47			2736.64	5266.08	12238.7		2455.51		2171.01
A0A0J7KKG9	60S ribosomal protein L9	8843.79	4050.66	3306.95	1350.11	2310	6610.65	1272.83		2802.56	7732.17	4370.42	10843.4	5804.26	6597.98	3788.28	1980.6	6184.31	8379.94	3945.72	2726.12	6104.06	7937.6	7523.36	2205.3	5491.79	5661.58	6488.69	3389.83		13971.9	11888.4	4066.27	1205.37		12921.1	6570.7
A0A0J7KKI1	Calcium-transporting ATPase	5884.75	5012.04	4843.38	873.127	1580.68	1062.22	1446.54		1399.58	2553.76	1651.41	2705.3	2100.29	1127.41	2661.74	5548.41	3689.14	2030.62	2535.33	1366.97	3414.72	1929.78	670.992	2702.28	2098.28	2776.32	2536.44	2292.68	3262.99	5875.61	3257.39	2468.22	2297.51		2036.08	2616.28
A0A0J7KKI9	Retinal dehydrogenase 1	11396.5	5915.64	8076.07	3293.28	7109.95	18464.2	2773.08	15316.7	1370.74	6614.36	3901.39	42052.3	7719.32	17284.3	2798.19	3900.04	3590.83	12211	11033.5	8878.3	16597.7	1918.82	10534.4	3106.86	2882.76	2637.4	4537.5	8817.08	9213.26	29528.1	12464.4	4922.91	4132.22		9145.14	3286.39
A0A0J7KKJ0	Phosphoribosyl pyrophosphate synthase-associated protein 2-like protein	3807.27		2123.77	3770.46	3299.19	5418.02	3333.1		4991.58		5304.09	2131.16	1134.77	2350.24	1736.43	2158.81	2951.12	2614.8	3200.03	4738.85		2610.9	2806.02	3333.9	4246.39	2616.73	3124.77				8342.6	7258.48
A0A0J7KKJ9	Homeotic protein female sterile (Fragment)	1094.34		471.798			377.586			309.111		1229.86	792.998	440.404	662.116	511.091			1211.26				1576.93				417.652	328.001	315.02			1042.59
A0A0J7KKL0	Malic enzyme	189044	83442.5	149205	236093	327110	257871	181695	257973	185668	1083460	241828	202228	215839	209942	178149	226736	345915	195309	487839	282248	80066	183544	302748	242306	219164	197337	246941	50115.3	27357.5	173263	248380	160609	25824.5		257041	219157
A0A0J7KKL4	Non-specific serine/threonine protein kinase	692.358					907.978	465.928					1516.56		597.657				1236.46				1669									1327.34
A0A0J7KKM4	ATP-dependent (S)-NAD(P)H-hydrate dehydratase	10147.8	1995.81	20710.9		2947.28	11909.8	2793.92	7471.32	6349.46	2626.77	9263.4	19097.4	15284.5	14958.1	18245.5	3949.53	10501.6	11934.5	7434.33	4546.48		16277.8	13802.2	1568.87	13734.9	11518.5	11103	6364.77		9214.04	10681.7	3255.41			16581.5	14491
A0A0J7KKM5	Lamin dm0-like isoform x1 protein (Fragment)	5677.73		5630.64	6779.21	7470.01	7434.71	14374.2	12164.1	6525.3	14742.4	8595.48	7293.95	9553.86	8055.94	11367.5		14340.4	4337.89	7544.48	16534		5572.78	7497.37	8590.03	13119	16258.6	8743.47	5415.17							68408.8	10451.9
A0A0J7KKM8	Pyruvate dehydrogenase	2715.47		5930.76			2734.04	2160.02		4548.86		2977.9	2220.38	1887.43	3955.65	1827.15		3748.66	3275.61	1853.59	1729.23		4833.6	1419.14			1301.69	2779.9				2131.19	3584.55				6178.29
A0A0J7KKP3	Hemolymph lipopolysaccharide-binding protein	4244.08	2226.02	4568.36			8215.99	3015.99		1169.45	1835.31	3024.44	1558.26	2847.68	5660.7	1194.76			3370.72	3806.97	1461.09		8263.39	4615.19				6751.37				6775.98	5290.33			7481.82
A0A0J7KKQ0	Acyl-delta desaturase (Fragment)	4658.83		12717.2	5441.26	12080.5	6788.7	3489.57	12781.2	5028.39	5210.7	5984.96	3818	5944.36	3066.74	3888.52	12818.4	9285.49	4729.84	10244.7	16949.2		4578.98	5884.64	9332.63	10590.8	6411.57	7187.4	5515.1	6039.42		6882.26	7824.11	7781.19	60147.7	11724.2	6564.84
A0A0J7KKQ2	Serine threonine-protein phosphatase mitochondrial-like protein			513.035			116.548	199.161		152.28		467.703							223.052														574.675
A0A0J7KKQ8	Hemocyanin_C domain-containing protein (Fragment)	2011.96	2463.93	1881.95			908.745	697.013		366.556	4140.73		2527.23	4152.03	2303.7	5877.47		1032.88	681.617		520.972		2834.52	778.852				1748.84	1162.17			2103.87	1810.82			969.933
A0A0J7KKR2	Pre-mRNA 3'-end-processing factor FIP1 (Fragment)	229.453		2213.68			755.916	408.388		278.372	575.218	206.93							1697.56									603.832					2095.2
A0A0J7KKR3	Epidermal growth factor receptor kinase substrate 8-like protein	3008.23		2672.67	1766.13	2987.79	4991.35	1520.21	8480.01	2672.94	7135.83	2349.39	1598.6	2164.7	2959.3	1636.69	3430.9	6199.17	1190.36	5785.29	6163.97	2962.96	5605.05		3735.25	6853.24	6410.36	5445.37	5306.9	12344.5	21419.6	4177.62	2552.1	2214.08		7378.24	4468.08
A0A0J7KKS2	Myosin light chain smooth muscle (Fragment)				2365.98		2179.84		11803.9						4549.12	8975.73	4773.55			15234.5	14055.6		6751.69	9983.53	3307.66			1766.56		12109.2
A0A0J7KKU1	Vesicle-fusing ATPase	942.77		5325.41		1247.92	1680.42	486.908		1093.49	1966.32	2055.03	814.286		1440.91			1107.91	1816.66		995.12	6424.41	1296.81					2367.31	2328.34			1335.34	4518.9	1126.41
A0A0J7KKU9	Tppp family protein	14089.6	5744.18	19160		1824.93	18603	11276.1	8308.5	5694.7	6583.18	11072.8	31081.2	8825.96	22850.1	11006.7	3891.59	6043.58	19843.3	9975.21	7039.02	6003.73	21868.3	7058.42	3492.51	8694.39	11818.4	20187.9	9907.65	5832.65	16727.5	22891.6	12493.8	1704.44	12424.5	11997.4	4941.23
A0A0J7KKV0	Dentin sialophosphoprotein-like	75444.2	27760.9	12933.3	402324	1023780	34000	65679.7	926121	57058.5		13787	39357.9	57440.5	181535	188047	665082	190027	59297.8	1474920	951850	28777.1	310163	165489	925248	68232.1	527859	109538			167936	385140	9250.68			306461	226063
A0A0J7KKV8	Reverse transcriptase	387.058		1166.25				982.556		609.134					578.003
A0A0J7KKW2	Flotillin-1-like isoform 1 protein	12141.4	1719.55	7439.58	7839.29	9538.04	3718.46	5548.79	15387.3	4135.52	11531.3	8944.11	5405.34	4737.92	3657.44	6377.56	10734.1	7403.05	6827.49	9199.9	19538.4	5091.83	7073.73	1118.57	7494.63	12347.4	8308.84	6516.1	9145.59	15817.5	11617.2	11640.3	1868	6043.57		13816.4	6106.17
A0A0J7KKW9	Tensin-1 isoform x14	677.483		722.373			335.392	241.97				1499.76	860.504		496.363				976.208				1336.86					695.44	562.117
A0A0J7KKX3	Proteasome subunit beta	3967.14		2757.87	4301.85	10377.7	6989.79	4391.51	13298	4267.12	11260.1	5649.47	3156.27	4958.04	3459.39	4096.48	9615.36	10649.5	3759.8	6598.44	40439.1		3432.63	4351.07	5956.92	6244.14	3915.28	6892.21	908.26			4785.3	5579.26			3721.26
A0A0J7KKX5	Leucine--tRNA ligase (Fragment)	2724.94		5402.48	1888.45		1710.91	2216.55		1991.37		2172.07	1934.55	1490.12	1924.98	2868.82			1790.03	1452.2							4472.32	3444.73				2208.1	3399.88
A0A0J7KKX6	Bee-milk protein (Fragment)	1489.13	7074.78	1174.26		1128.86	963.939	970.577		523.637	74636.1		1058.39		1055.98				1038.53	2890.27	3585.29	2440.69						935.386	2561.2	2013.75		2003.87
A0A0J7KKX8	E3 ubiquitin-protein ligase huwe1	1605.81		1658.57	2306.08		1845.47	940.765			2967.92	2626.16	1776.85	2342.37	1815.32	1235.96			2604.64	3344.38		5153.03	3223.05	756.705			1680.69	1232.81				3563.14				1468.14
A0A0J7KKY3	NADH dehydrogenase [ubiquinone] 1 alpha subcomplex subunit 12	14111.1		36972.8			15443.4	13501.3	20702.9	11731.3		14634.1	13487.6	25366.2	13011.6	19599		11112.1	13042.7	15321.2	6704.76		14932.5	20605.8		21121	26620.1	21371.8				9995.01	29746			25260.5	26671
A0A0J7KKY9	RNA helicase	1036.96	7005.38	1225.95	6952.66			344.447				1475.44	704.469		720.558				2453.88					2210.87					1437.44
A0A0J7KKZ0	Sulfide:quinone mitochondrial (Fragment)	51967.6		309352	1603.1		35494.3	64263.4	8305.13	52617.5	1272.55	85139.9	49854.9	53833.9	34173.6	47148.2	4745.05	23731.2	76687.4	26428.8	5731.64		23276.3	9493.56	2224.53	20511.9	43942.2	44936.4				57509.7	198532		130280	11719.9	63268.1
A0A0J7KL01	Coiled-coil domain-containing protein 40-like protein	8825.63		40718.4			5235.93	10398.1	7936.47	9870.64		8878.68	6421.08	7474.51	8580.61	6153.47		7672.71	9110.9	4569.18	3983.94		4564.97	4138.18		8109.14	4124.05	8014.56				7340.47	13897.9			1693.98	5706.11
A0A0J7KL07	Adp-ribosylation factor-like protein 1-like protein	325.812		628.965
A0A0J7KL20	Metabotropic glutamate receptor 2										720.415	5325.32				2312.17		3591.83						2060.59									2898.23
A0A0J7KL26	Barrier-to-autointegration factor	2019.71		4955.96	5539.4	3853.28	3570.99	5530.61	4040.78	4016.04	2011.06	6009.01	5035.4	3329.33	5016.36	4094.42		7998.31	3060.06	5791.03	12628.9		2749.92	9555.92	4123.44	4281.86	8079.21	3251.07								27355.3
A0A0J7KL39	Galactose mutarotase	1739.79					958.4	555.82		906.539		1047.83	1415.2		2099.02	907.43			1362.96		1079.15	2491.87	1195.91	4393.2		2954.27	1185.84	1173.44					1653.06			7590.98	1975.35
A0A0J7KL44	Asparaginyl-trna cytoplasmic (Fragment)	6654.05	4407.63	12397.8	10076.5	7605.34	8068.36	5364.35	6225.89	4203.76	1898.19	9132.97	11781.5	4989.62	8696.71	2036.7	7826.8	8512.68	10221.2	12143.3	9225.14	18716.7	12279.7	5098.92	11720.6	9026.98	4658.22	6281.05	3589.52	4584.39	7211.79	18342	8603.24	1851.33		1630.23	4901.46
A0A0J7KL50	N(6)-L-threonylcarbamoyladenine synthase	2379.79		553.735			814.814	241.728		460.13	456.175	2181.74	2177.59	1325.93	2135.4				1347.46				2310.74					1302.45				3301.32	1434.42
A0A0J7KLA7	Nucleolin-like	7400.72	3594.81	21350			12056.3	3148.28		1220.5	4540.14	5440.33	11622.5	16313.6	7978.99	9703.49	2463.78	3131.9	6389.78	3289.68	3749.6	1774.61	18820.3	8260.84		5122.85	8672.95	8984.11	8611.01			6979.87	5843			8643.63	6236.57
A0A0J7KLB0	Protein tumorous imaginal mitochondrial	2171.58		2724.85			1406.03	1400.01		1489.42		2252.03	1798.39		1423.74	1548.25			1429.88				1280.5					2007.76				1533.74	2327.16
A0A0J7KLB8	Cytochrome p450 9e2	721.948											256.022						801.673				789.328
A0A0J7KLC5	60S ribosomal protein L13	26684.2	9003.64	9077.01		3724.5	22134.8	4816.41	13230.4	4469.28	9548.93	15061.9	30941.7	14667.9	29001.3	8879.01	7139.05	11387.8	23152.4	13189.9	7107.14	21858	40482	20162.6	1931.42	14831.6	17738	16882.2	7097.19	6294.1	36267.7	25184.6	5909.29	6862.55		18108.2	19363.1
A0A0J7KLC7	HECT-type E3 ubiquitin transferase						748.177				3165.26				505.457														3039.91	4827.95
A0A0J7KLE8	Molybdenum cofactor synthesis protein cinnamon isoform x1	5898.11		15489.3	17589.9	30055.7	13685.9	6397.3	31032.1	8671.48		8884.29	6411.83	9468.52	8707.79	5768.89	30558.7	16470.6	8209.56	20462.5	15125.2		8113.99	3336.91	22669.7	14402.7	13095.4	10521				14404	11792.1			6457.98	8588.39
A0A0J7KLG8	Unconventional prefoldin rpb5 interactor	99160.9		73574.8		1836.66	25087	40880.5	10690	56908.1		46675.1	56968.5	99111.3	48576.7	145514		27576.6	39196.9	25115.4	11733.2		37658.9		1676.63	34569.4	134240	37224				70522.7	33208.5			163278	58917.8
A0A0J7KLG9	Triosephosphate isomerase	59361.8	156373	125898	55292.8	59796.6	52801	83177.6	135941	67096.7	185397	101960	64234.2	37296.8	89112.3	51139.9	78299.1	89652.5	79251.8	79219.1	97715.5	50643	111169	71248.8	77069.8	142409	104143	71695.7	135324	81756.4	95235.9	68165.4	139922	25430.8	122017	87055.6	104102
A0A0J7KLI3	Tumor protein p53-inducible nuclear protein	1869.58		511.814			4142.95			1530.79		3234.85	2203.19	3779.95	3469.65	1507.33		3784.95	706.178	2374.67			4385.66	4972.2		11047.5	5872.71	6423.89				1805.3	1777.76			5186.05
A0A0J7KLI7	Twitchin-like protein	325.344		887.442				289.19				660.394	301.262						252.187														661.559
A0A0J7KLI9	AP complex subunit beta	3025.85	6264.64	13014.7		4647.97	15260.5	6524.64	33640.2	3263.81	35164.2	9986.97	1218.51	5146.75	14883.3			11338.6	7935.2	72311.8		13792.7	6358.25	2207.87		17069.4		6822.2					6741.8			597.569
A0A0J7KLJ6	Transcription elongation factor spt6	1658.71		17930.6			3749.19	3775.04	3979.25	2496.21		3036.59	5482.09	16011.1	1984.09	14599.2		6498.98	4221.94	7192.5	1717.42					7738.01		7980.29				8730.91	14157.5			3551.3	20701.1
A0A0J7KLK6	De-cadherin-like isoform x4 protein	278.822		1184.31	5325.66		186.463	217.102		158.09	447.675	331.822	778.083	473.725	430.799	465.246			450.682	1092.97	8814.68		1936.62	432.516	6127.15			517.401	2365.92			2590.6	2227.33
A0A0J7KLL3	Succinate dehydrogenase [ubiquinone] cytochrome b small subunit	2034.42		2717.21			1743.34	2495.93		2617.05		2416.6	1420.81		1325.16	5193.95			2149.89	1549.93			3932.96	785.584			1825.19					1460.59	2910.43
A0A0J7KLP7	Programmed cell death 6-interacting protein	700.294		2442.44	2173.6	1435.09	1590.37	429.736		768.835	2310.17	743.132	2046.57	1991.51	1098.65	2509.94		1127.78	1634.37	2504.32	2237.38	3079.27	1425.42	2318.58	1951.65			1044.6	3224.09	3257.09		2483.88
A0A0J7KLQ0	Thioredoxin domain-containing protein 9-like protein	469.666		1214.95			362.337	313.627		385.328		436.09	393.862	669.134	120.381	415.689			451.495		2942.91												678.89
A0A0J7KLQ4	Acyl--binding protein (Fragment)	17180.9	12249.8	5159.33	9182.61	8436.47	24569.8	3577.11	8934.24	2953.86	80103.9	7156.1	22444.8	6072.24	21991.7	2038.09	13513.2	8504.83	7367.71	26904.6	22906.4		32606.3	18176.5	17434.8	5835.03	7230.05	11526.2	23463	6259.09	9939.24	10256.1	1679.22	3482.45		10939.1	5685.69
A0A0J7KLQ6	Proactivator polypeptide (Fragment)	5711.53		3599.65			6678.22	1109.28		755.905		3544.28	7134.52	1925.79	4738.84	1773.04		2053.27	9059.36	4613.9	1862.27		1513.24	4624.49			1932.14	2632.68				8925.57	1817.31			2694.18
A0A0J7KLR2	Origin recognition complex subunit 4	213.437		1524.81			133.748	240.047		334.03		121.469			183.804				241.325														1175.24
A0A0J7KLR7	Putative salivary secreted peptide-like protein						2243.96													1031.64
A0A0J7KLT2	Glycerol-3-phosphate dehydrogenase [NAD(+)]	42959.7	14181.4	23689.2	32315.3	27770.2	30371.1	38011	34341.4	38308.5	4557.19	43497	28847.7	50830.1	33101.1	58034.9	34621.9	37508.5	39999.9	43516.9	17310.2	8631.33	31875.1	31583.7	28908.3	54245	57592.9	38936.2	5989.02		34460.2	34447.1	25092.2	28834		30222.6	31367.5
A0A0J7KLU8	Ribose-phosphate diphosphokinase	9160.29		3654.87	15946.5	29876.5	17484.2	6897.89	16735	10005.7		11482.1	13509	22827.7	17081.6	25541.3	17683.2	31320.8	6368.37	25184.8	28843.2	4412.42	12423.5	25839.2	18270.5	37682.2	26981.3	37442.1			35011	36744	18694.1			34194.3	20633.3
A0A0J7KLV6	Peptidyl-prolyl cis-trans isomerase	9254.22		22662.4	7974.49	10412.5	10817.8	3875.96	13656.8	6939.53		8320.88	8529.16	5958.12	7449.58	10098.4	15048.2	8701.75	5979.01	17008.4	24374.7		14831.2	15348.2	13838.2	11994.2	18101	11966.5			12257.5	6095.49	9250.9			33111.9	6632.44
A0A0J7KLV9	Low molecular weight phosphotyrosine protein phosphatase	477.643		3105.88			1365.94	539.009		1450.19		2850.53			1070.19				1730.18				2423.35										6332.53
A0A0J7KLW1	Tubulin beta chain	96431	2799.43	112066	2505.71	2833.36	71447.6	79271	27406.5	80728.3	1555.79	81780	68756.2	60181.1	88378.7	49370.6	8167.21	56375.5	53161.8	46065.2	14792.4		58398	28362.3	3470.29	53002.6	43516.1	95962.2			19321.4	81368.8	71977.7			9548.2	32120.6
A0A0J7KLW8	Echinoderm microtubule-associated 2	826.095		1990.9			706.75	732.138				2034.94	945.581		1721.97				4553.22				3294.03	289.562									3170.15
A0A0J7KLX2	Nucleoprotein tpr (Fragment)	1585.48		1601.91			832.189	303.596				2408.09	1775.31	1521.74	871.312				1714.92				1075.04				1333.75	1670.44				1781.23	3381.02			1262.79	2478.34
A0A0J7KLZ0	Aminopeptidase		7190.04	4195.44		9838.83	21143.1			2282.42	182802	241428		33647.8		15691.2		10910.2	4180.07		1423.21								162522	237797	4138.03		801419	105037
A0A0J7KM00	Elongation factor Tu		11569.9	935.173	5079.18	3993.99	885.621	1033.96	3123	614.218	3762.42		544.779	963.152	277.641	1790.62	3556.85	4186.56		3876.11	2400.11		1842.02	2395.02	5488.56	5338.6		1988.62	5696.7	6916.45				5292.82		3850.89	5186.49
A0A0J7KM12	Ras gtpase-activating protein 1-like protein	1378.74		5501.12			565.803	747.163		502.082		330.937			452.699	1785.92								2694.15									1080.48
A0A0J7KM50	Zinc transporter 9	5788.43		8433.01			5616.77	9325.77		9535.78		7892.99	3012.71	4914.17	4270.42	3985.54		4576.84	5844.4	3688.06	810.909		3095.81	2381.8		3776.62	3000.9	5963.16				3273.33	14503.8			3989.26	3509.9
A0A0J7KM63	Peptidyl-prolyl cis-trans isomerase	3978.33	3541.79	4054.88		1860.49	4013.34	2022.73	3561.62	1381.56	5351.54	1952.3	8403.12	2249.02	3283.38	2999.89			3400.41	7410.3	3175.79		2143.09	13646.2		3091.54	7729.24	2357.81				10114.8	4643.52			17857.1
A0A0J7KM70	Ras-like protein 2 protein	438.076					347.155	237.103			1432.16		687.519						699.489				692.96							3249.46
A0A0J7KM75	Gamma-aminobutyric acid receptor-associated protein	6882.24	22941.5	19015.3			10846.1	13119.7		13741.3	1085.66	10483.7	2343		7988.53	9655.34		5571.6	8519.96	2657.34	758.049		7575.83	3254.12				5534.09					8931.25
A0A0J7KM77	Signal peptidase complex subunit 1	818.809					758.287			484.043			316.339		700.773				1888.51
A0A0J7KM86	Isovaleryl-CoA dehydrogenase, mitochondrial	3988.41		3793.22			4154.05	613.145		404.671	11387.6	1867.84	6478.21		3215.81				5458.91	3795.16	1161.83		1522.47	976.394			3024.82	1366.99	2007.73			2374.21	1140.4			4148.37
A0A0J7KM87	Lysosomal aspartic protease			2276.69																												3289.78
A0A0J7KM98	Pleckstrin homology domain-containing family f member 2-like protein	665.138		1055.48			803.178	673.856		428.318	8825.7	717.182	1227.3	760.791	803.376	765.983			1049.72				739.749					1505.19	1529.39				602.765
A0A0J7KMA1	Proteasome-associated protein ecm29-like protein	325.844		1220.4			287.68	208.172		248.952		429.246	903.725	263.671	513.496	407.463			542.47														852.682
A0A0J7KMA8	Glutathione synthetase	1600.7		2754.02	2048.04	2376.89	2167.72	2072.54	2180.17	1243.87	736.206	1872.25	2296.04	2233.82	2789.79	1506.71	3955.06	1854.84	1920.25	2346.51	3304.58		3672.01	864.881	2652.94	2873.2	1539.68	1895.65	922.526			2040.1				678.668
A0A0J7KMC8	Wd repeat-containing protein 7			2833.38			2621.11	2810.8																								5179.7
A0A0J7KMD2	Importin subunit beta-1 (Fragment)	3286.52		5781.67		2043.63	3561.51	1942.05		2916.45		6502.43	2354.07	1257.41	2930.85			2583.12	6022.95	1990.7		5353.41	2384.13		1545.89	2539.58		1789.79				3386.98	8706.7
A0A0J7KMF0	Aldehyde dehydrogenase (NAD(+))	10561.4	6095.17	9861.14			10803.5	7555.88	17737.2	5011.16	2923.19	7342.26	20576.3	9077.79	10887	13815.2	4996.76	6922.5	10950.9	14661.7	4315.63	9743.22	10549.7	10615.6	3830.53	19923.8	12776.4	9657.47	4101.87	2520.7	7559.48	15691.8	22113.7	2881.1		22271.7	10924.2
A0A0J7KMF4	Leucyl-trna synthetase	443.51					261.343	659.404		477.992		578.81			83.1776				217.34
A0A0J7KMH0	Inorganic phosphate cotransporter-like protein			2135.84			468.092				10479.1																		6528.89	16703.3				1895.5
A0A0J7KMH4	40S ribosomal protein S8	11617.5	5732.41	13511.3		1657.9	11768.8	3792.97	5938.05	3940.43	6233.6	6629.34	14812.1	7649.06	12550	3790.84	2316.57	7669.79	10303.1	8118	7985.03	8326.28	16759.7	5140.08	3385.97	6292.81	4701.62	7141.69	6595.12	5016.97	4085.55	10696.2	1651.12		58842.8	4005.69	7217.64
A0A0J7KMH9	Glycerol-3-phosphate dehydrogenase (Fragment)	12877.8		31956.3	2417.58	2979.81	16609.6	9696.42	5324.74	8353.27	1862.15	13928.6	18199	3072.39	14093.5	1215.5	2920.16	4755.85	24233.7	5750.4	2496.7	875.426	8175.19	3015.41	2413.87	4264.3	2723.2	5417.25	2255.28			15786.8	17372.5
A0A0J7KMI3	TEDC1 domain-containing protein			261.64				95.2544				142.289							81.566														401.34
A0A0J7KMJ2	Malectin-a isoform x1	847.297		1826.4			939.343	685.075		998.946		1952.27	556.474		857.189			1897.88	1588.44				1466.96					1026.78					2345.84
A0A0J7KMJ6	Renin receptor	2047.08					2656.08	1239.58		651.489		1635.97	2390.13	2259.83	2458.25	3047.73		531.022	1502.72	2200.78	2466.42		4191.07	875.926		1324.43	1561.2	2361.53				3005.47	806.005			2820.7
A0A0J7KML2	Splicing factor 3a subunit 3	853.547		239.677			444.011	223.819				472.15	632.118		315.226	1314.11			366.749				888.754				886.683					1184
A0A0J7KML6	Retrovirus-related pol polyprotein from transposon tnt 1-94	8162.6		11403.2	25323.4	29818.7	2230.81	8815.88	43154.4	10522.8	7364.23	11687.5	8836.33	8119.72	6577.18	11988.9	10456.2	13244.7	6958.64	15434.7	31866.7		17389.4	10301.6	32405.8	10512.3	8119.04	9336.52			6084.6	3418.83	2943.5			4845.46	12363.6
A0A0J7KML7	Larval cuticle protein lcp-17	427.048		1173			203.05	313.041		313.93	1307.49	479.202	673.328	280.19	51.9071													365.302					896.936
A0A0J7KMM0	Contactin	674.712		982.521			362.372	190.778		274.634	726.648	395.345	779.838	330.681	373.6	548.419		571.371	543.113		815.417											1260.01
A0A0J7KMM6	Reverse transcriptase domain-containing protein			8789.87			4172.67	5458.96		10213.2		8735.07			4615.96								586.792
A0A0J7KMN0	Vigilin-like isoform x2 protein	6170.4	3716.29	2789.87	3447.7	4495.42	3996.71	1028.62	5643.07		2676.51	4060.98	11573.1	4678.46	7076.86	1854.88		3494	3568.39	4044.18	2725.23	7628.4	3899.73	5351.35	1498.94	3111.55	6326.76	4404.18	2899.28	3042.31	15524.5	3206.29	8060.42			6126.79	4580.77
A0A0J7KMP9	Putative peroxisomal acyl-coenzyme a oxidase 1	401.204					315.432				900.251		317.011		480.267	494.204			554.619				289.856		874.68
A0A0J7KMQ5	Fatty acid-binding protein 9-like protein	10126.8		20665.5			6686.08	5851.7		1743.19	7220.46	6573.32	50294.1	6365.75	6784.29	4395.52	1733.83	4474.6	10567	5034.11			5126.16	53486		4941.38	26836.8	5044.65	1458.51		22188.8	17046.1	5922.06			85029.4	3135.67
A0A0J7KMQ7	Multidrug-resistance like protein isoform e					5063.44	1528.56			535.349	18438.1			1096.45	531.11				934.509								580.409		20349.4	26342.3		1795.17		11790.8
A0A0J7KMS9	Ammonium transporter 1 member 2-like protein	942.864		30982.1			3972.51	3740.93		6609	607.649	7150.63			1285.91				11341.6									1943.94					40532.2
A0A0J7KMT6	Uncharacterized protein C7orf63			4667.61			1630.06	1651.87		2997.24		3793.45			1258.72				2551.12														6274.91
A0A0J7KMT7	Mitochondrial-processing peptidase subunit alpha	5067.1		6822.13			3700.53	4582.44		5805.74		4515.26	6239.72	3212.77	6658.85	6101.37		6915.78	3643.14	4460.41	796.665	1114.15	5064.21	2925.81		5922.66	2452.82	6757.28				3338.61	3531.89				4372.86
A0A0J7KMU4	Proteasome subunit beta	18087.8	2519.64	44295.1	19671	23270	23478.8	26410.7	18219.5	28136.8	25307.4	32370.1	12893.7	11431.8	13139.5	14945.6	14148.8	27528.6	29247.3	22552.9	32088.5	8484.1	16984.7	6953.26	21159.7	14537.8	8676.38	23585.7	3454.82			22505.6	58993.1	5397.69		57027.6	10566.4
A0A0J7KMW0	Gamma-tubulin complex component	652.394		509.436			676.044	203.666		478.556		760.299	598.315	434.884	555.259	727.36		1240.04	496.727		1176.75		1054.26				551.328	618.468				1168.13
A0A0J7KMX1	Aspartate aminotransferase	19279.5	41706.8	27269.8	1809.05	1375.54	19204.7	11216.8	6684.83	15168	146449	18779.3	17330.5	18162.8	17470.7	18371	3359.2	23429.3	18045.8	32947.3	14629	2709.49	21662.7	18442.7	2307.3	22143.5	19128	14894.8	8926.34	2825.09	12383.8	19614.6	20431.9			33337.9	18689
A0A0J7KMX6	Ankyrin repeat and sterile alpha motif domain-containing protein 1b	3698.94		3294.67			884.358	1825.25		2280.05		2633.75	766.348	598.489	1016.19	1499			2000.45													1603.5
A0A0J7KMY8	26S proteasome non-ATPase regulatory subunit 2	4475.57		13152.7	10024.4	8844.44	6037.31	1933.75	4785.43	6623.55	862	5908.27	4011.85	3923.91	3909.33	2528.6	6067.96	6398.58	7545.83	9365.03	2637.42	15214.7	2940.72		2586.06		4406.93	4828.21				6674.67	15584.3			2654.85
A0A0J7KN02	Early endosome antigen 1-like protein (Fragment)	16820.3		23998.2			15833.7	21163	5359.42	23481.6		20760.7	17138.9	11695.9	20386.9	33327.8		13138	20201.8	8539	2193.57		17447.2	7294.14		12655.7	11644.4	14124.1				14058.1	16438.8			2989.14	13882.3
A0A0J7KN25	Glutathione peroxidase	9134.51		16279.7			10677.6	11984.2		8811.75	1718	6617.68	8986.66	11746.2	12725.6	14411.7		3423.89	12643.5	3769.38	2308.76		6945.28	25710.8	10572.9		6016.27	11518.9				13817.3	20982.8			60834.2
A0A0J7KN28	Proteasome inhibitor pi31 subunit-like protein	3925.7		4616.3			2693.56	1733.26		1010.14	1012.09	2454.06	2776.61	1393.07	1980.86	1602.91			2223.4	2041.18	3438.24		1787.72	1048.78		1534.47	1232.62	1357	2535.91			3204.46
A0A0J7KN29	Bifunctional coenzyme a synthase-like protein	8725.31		25166.1		5249.44	8406.78	12920.7	4450.49	9926.87	885.306	11021.5	8721.27	11384.4	9326.66	13890.9	5864.33	8301.32	10522.9	10686.4	2749.1	4073.6	11501.5	8507.88	5630.01	8652.05	10897.1	13007.4				11115.1	16719.1			4350.7	9032.61
A0A0J7KN30	Inner centromere protein a-like protein										7529.17																		2499.54
A0A0J7KN36	Fatty acid synthase (Fragment)	19635.7	19371	6109.82	3403.86	2290.47	3849.3	965.235	23817.4	462.254	37175.3	3310.52	31882.1	11324.9	7840.91	15944	8502.26	7065.2	7331.94	30173.2	14399.2	139951	2927.28	10326.5	5970.37	4790.59	3128.74	4286.07	35342.8	20881.9	11938.7	8277.19	7432.49	18334.2		6417.29	4436.19
A0A0J7KN37	Cytochrome b-c1 complex subunit Rieske, mitochondrial	40990.9	7908.33	36196.7	3742.8	4405.93	22372.6	18074.1	21361	32758.3	2942.99	63713.7	32768	51507.1	65844.5	53076.8	11712.5	64524.7	27014	42943.9	16375.6		66117.8	51067.5	5369.17	58599	68807.9	68905.1	3717.61		46383.2	64432.6	108733	5476.01	1078430	81303.2	121067
A0A0J7KN43	Sideroflexin-2-like protein	40318		57323.6	3709		50189.7	28981.4	18481.6	39982.5	1885.56	47202.7	41029.2	65054	49774.6	38863.7	4975.61	47096	38298.3	57198.3	6636.4		76648.6	58334.8	6330.29	30704.5	57635	55586.8			23984.6	62238.2	68119.4		92808	26991.6	92670.6
A0A0J7KN60	60s acidic ribosomal protein p0	7431.03	3843.94	15060.9	9253.82		2400.07	1328.42		1113.14	1615.09	2227.4	4214.79	2634.33	3353.37	2019.8		2616.02	4877.99	1502.57		13619.7	3433.83	3409.35			2387.74	2145.81	2579.28	1454.69		3712.38	9218.63			2501.61
A0A0J7KN64	Malic enzyme	8174.59	5208.2	8364.41			10034.1	10571.5		9833.46	2208.34	5957.03	6464.83	18766.5	12700.1	11631.7		10652.4	7487.21	8907.83	7250.67		10725.2	4588.89	1830.76	13133.3	11236.8	20699.4				8947.6	11863.5			10182.6	9964.81
A0A0J7KN69	Caib baif-transferase family protein c7orf10-like protein	1531.79		4547.96			514.458	1460.99		1046.71		2334.36	945.313		1230.93				762.252														1340.39
A0A0J7KN72	E3 ubiquitin-protein ligase huwe1 (Fragment)	710.941		937.953			640.092	296.022				1081.86	667.524	658.463	676.865	570.703			634.396		2496.59	7344.29	1310.81				2293.14		1214.32			594.821	1613.02			2328.93
A0A0J7KN78	60S ribosomal protein L5	13120.4	6496.12	10787.6			11806.2	2740.79	6452.19	2861.46	8232.12	12322.4	21203.6	7942.85	17568.4	2976.04	3233.48	10017.5	17543.6	14368.6	8587.23	10823.1	13062.3	8965.44	34695.5	8152.78	7521.77	7742.38	7095.73	8014.09	8375.69	11265.4	12796.5			7036.88	3260.1
A0A0J7KN81	Udp-n-acetylhexosamine pyrophosphorylase (Fragment)	2888.79		2002.02			2052.16	1202.71		1432.84	4392.67		2106.16	1228.26	2505.42				2141.01	2586.94		12443.5	2425.81				1734.08		3922.03	6615.6		2928.5
A0A0J7KN99	Cytoplasmic aconitate hydratase	329380	12707.7	475110	16504.4	18941.1	334240	566434	150819	516502	70913.7	457314	265588	229540	243834	163668	39714.6	188061	337085	225151	84537.7	18167.6	307587	147092	27541.1	164682	148669	445118	16765.8	4768.93	99068.4	229524	562000	28050.7	669225	106216	98759.9
A0A0J7KNA1	Fun14 domain-containing protein 2						129.365	57.7199
A0A0J7KNB3	Coiled-coil domain-containing protein 43	519.697					379.96				1438.21		488.193		188.061				622.499				577.525					730.005		392.352
A0A0J7KNB4	DUF3421 domain-containing protein		13076.1			6172.15	13059.6			296.166	58728.7							569.488			393.477	2281.85							47095.7	110231				11432.5
A0A0J7KNB8	Sideroflexin-2-like protein	3595.99		1246.18			870.554	400.892		337.349		361.414	965.342	1617.87	1064.68	1220.86			508.241				2651.51	1898.42			1821.2	2538.79					2109.86
A0A0J7KNB9	Translationally-controlled tumor protein homolog	5365.57		5560.73			5446.66	1650.98		1731.23	2017.57	2032.49	6261.54	4059.47	4936.31	2969.91	5174.96		3679.66	3754.43	1803.97	6801.73	4134.47	8941.78			2158.95	2313.8	1747.1			3192.42	1434.46			8778.88
A0A0J7KNC5	Glutamate dehydrogenase (NAD(P)(+)) (Fragment)	89828.1	13485	70844.4		6119.18	71247.2	91175.2	37425.1	90694.8	2982.89	109259	44969.8	74977	72002.2	128313	23021.2	50521.7	57283.4	50549.1	19377.6		80609.6	58444.7	18778.7	78815.8	74801.2	100499	4852.78	3687.78	82573.8	43491.9	81205.1		262983	41179.3	77033.2
A0A0J7KNC9	Regulator of chromosome condensation	1136.39		456.044				242.174		470.784		795.703	510.487		416.934	398.177		1651.18	603.569				256.84										720.919
A0A0J7KND3	Glucosidase		9230.45	8279.18		7376.84	148912	2320.21	11380.5	10133.3	49455.1	1260.78	2652.94	2377.31	1240.57		1507.46	26245	2191.36	7631.5	6416.14		2654.14	4151	5937.7			2138.15	32718.3	100090		8741.36	2304.8	39663.5
A0A0J7KND5	Atp-binding cassette sub-family b member mitochondrial			1622.06			596.096	493.957		613.694		902.734			520.413				548.138	1121.81								837.47
A0A0J7KNF7	Inositol polyphosphate 1-phosphatase-like protein	1482.44		1373.96		1551.69	849.452	1167.39	3904.57	1381.48		1680.8	1739.64	1948.34	1613.54	2246		1611.66	983.551	2129.31	1155.39		1819.03	3195.12	1644.34		2548.18	2519.3					3002.43			7905.58
A0A0J7KNG2	Mediator of rna polymerase ii transcription subunit 12		3205.24								16716.7								292.137										2442.5	3897.4
A0A0J7KNI0	Effector protein		27563.5	6212.08	1654.28	1900.17	419.903	1382.54	5480.68		77479.3		1248.15	651.348	821.041	5869.22	10100.2		1487.84	5735.61	3565.47	2666.9	962.358		7482.07			538.045	17995.2	17701.3				6358.65
A0A0J7KNI3	cGMP-dependent protein kinase	2234.58		2701.24			2188.28	1184.69	4293.99	1692.4	4560.17	2128.55	2588.83	1731.24	1769.01	1582.05	3484.53	2772.47	1481.77	3655.11	3750.07	4081.16	2458.35		4519.83	3601.34	2391.41	2917.35	4519.42	5712.63		2394.58	2823.06			3108.66
A0A0J7KNJ1	Palmitoyltransferase	334.078		1089.03			388.689	680.921		527.06					389.734				362.621
A0A0J7KNJ3	Wd repeat-containing protein 47-like protein	5270.27		6230.33	9777.52	23519.5	5314.79	4070.91	29175	5914.17		11062.7	5387.6	6051.52	4275.52	6568.25	19975.5	14624.3	5450.71	26851.9	15540.9		18872.5	5500.91	16636.1	24868.6	13855.9	11579.8			14244.1	12717	9080.91	9567.21		14303.6	30761.9
A0A0J7KNN4	Leucine-rich repeats and immunoglobulin-like domains protein 3 protein	5372.9		1869.66				3259.94			19970.2		945.957			2625.09			1899.28	3436.88		80285					6488.41		4173.85	2060.95		9534.28				1277.13
A0A0J7KNP1	Nadh dehydrogenase	24799.7		16846			16162.5	20209		27492.4		23294.1	22537.9	26783.5	16941.2	37173.3			26814.1		7408.81		41794.1	5767.9		28726.2		21981.1				32574.9	124525				18320.5
A0A0J7KNQ7	Transcriptional activator protein pur-alpha	2592.59	3460.6	2339.49	628.999	2423.68	2349.49	1774.52		1863.62		2767.2	2567.65	3032.12	3369.27	3417.42		3358.68	3574.47	1880.46	4379.41		3718.6	2510.73	2524.78		2266.99	2197.14			20148.7	5884.68	4445.54			5500.83
A0A0J7KNS1	Molybdopterin-guanine dinucleotide biosynthesis protein b	2166.38		5165.92			811.159	2060.89		3874.67		1785.56	1011.82		991.552				1611.67									925.501					3628.74
A0A0J7KNS7	Proteasome subunit beta type-1	8654.46	1562.49	12590.2	6664.67	8167.21	8751.83	7789.04	10457.8	7846.53	9802.27	8787.44	4893.38	7378.66	7796.61	8759.17	9966.28	8348.17	7855.86	6746.37	21168.2	7148.54	5252.46	3273.92	5742.18	8870.66	6354.64	8366.6	620.197			9648.41	14841.1			3479.25	3221.92
A0A0J7KNT5	T-complex protein 11-like protein 1 protein	1308.02		1775.63	2753.84	2502.39	833.172	551.879	3096.31	788.006		1159.64	799.973	2056.76	1157.16	1077.63	4392.61		1331.56	1579.15	1137.66	3866.7	3523.82	768.815	3118.18		1506.84	774.684					2707.39			826.736
A0A0J7KNU5	Ran gtpase-activating protein 1											782.099	1241.32	1166.32	737.379				933.815				1126.12				1689.5	700.66
A0A0J7KNU6	Tetratricopeptide repeat protein 39c-like protein	6440.86		7008.9			7213.29	6033.74		9181.73		7255.62	4036.82	6594.83	5868.89	3512.63		5030.58	6318.98	5748.74	4197.53		12464.3	6125.45	2041.29	16368.4	5027.7	5091.06				1899.3	9196.76			3959.72	5896.21
A0A0J7KNU7	ATP citrate synthase	34193.8	13457.7	17044.2	5016.09	7041.2	15038.4	5547.71	37043	4171.2	18571.8	13909.8	36587.3	13270	28615.2	24115.9	12196.9	12313.5	19789.4	31921.3	15671.3	64479	20882.7	17438.1	9525.93	16089.7	13036.5	10817.4	17738.1	15473.4	34753.9	19439	4636.11	7840.42		19243.7	20816.3
A0A0J7KNV6	Phosphotriesterase-related protein (Fragment)	835.778		909.004			861.552	385.983			5252.17	421.033	1277.3	926.562	1519.96	1005.54		1239.35	594.41		2104.84	5093.53	1510.9	1034.03								2151.86	1308.87			5941.87
A0A0J7KNW4	Carboxypeptidase b-like protein		2139.33								5206.54											8846.67							3301.42
A0A0J7KNX6	J domain-containing protein					12709.1										2560.05	5123.73			10894.3	3194.28				10354.3							19007.6
A0A0J7KNX8	Ap-1 complex subunit mu-1-like protein	710.826	1888.95	1013.99			474.299	461.472		559.395		1425.48	460.539		746.929			443.153	1195.93			3305.02	1011.16			576.791							1192.85		13992.3
A0A0J7KNY0	Laminin subunit beta-1	1410.53		1078.76		2892.14	983.839					4270.67	3740.72	1349.73	4146.6			2910.43	3450.8				1380.39		3819.19	4231.17	2934.13	3667.73				2206.29	5512.09			1452.42
A0A0J7KNY5	Casein kinase II subunit beta			851.31
A0A0J7KNY6	Protein phosphatase pp2a 55 kDa regulatory subunit-like isoform 2 protein	2546.85		1774.39		989.156	1077.71	453.935		434.013		1453.89	3129.26	1961.57	1496.91	1789.29		853.857	1982.13			2281.2	1528.34				1372.8	833.079				3282.5	2578.2			483.507
A0A0J7KP09	T-complex protein 1 subunit gamma	9380.75		22830.9	19022.7	22157.9	10355.7	11215.2	20958.6	9275.62	2687.11	14813.3	4912	4823.9	9061.59	7728.25	30875.4	24432.6	10089.6	17884.7	31640.9	22618.2	7394.49	8605.29	22825.9	9783.7	7746.06	12408.6		3706.13		10874.8	13135.3			21951.6	10457.9
A0A0J7KP11	Nadh dehydrogenase	7903.19		6223.24			3944.1	6639.34		5579.6		5142.06	4734.81	6099.4	3990.37	8143		4461.06	5016.16		5786.2		2891.36	6398.97		7102.57	5804.59	5982.82				5129.21	9298.75			8673.57	4444.16
A0A0J7KP20	Glucosamine-6-phosphate isomerase	18248.7		25263.9	17591.6	24828.9	21333.2	16238	28919.9	15990.8	23921.6	25589.5	25094.4	21649.6	21769.6	35611.5	14941	31305.1	28747	16805	56086.2	8692.1	12143.8	23310.6	22933.7	37859.8	19908	25331.7	2918.87	3512.52	15112.9	35422.3	22787.7		66916.4	38500.4	36160.5
A0A0J7KP25	Nicotinate phosphoribosyltransferase	42876.5		42694.5	9953.8	8497.68	37257	35374.5	13906.3	34062.6	2946.76	41796.2	35399.5	79718	44124.5	47092.5	11966.6	34965.6	30932.6	34692.1	13545.9	11356.6	37357.2	37602.6	10926.4	33310.8	47918.2	46197.1	2480.93		30079.8	44539.5	36338.1			41398.9	35244.3
A0A0J7KP33	40S ribosomal protein S3a	10789.3	10506.2	8815.41	9077.78	2331.26	5820.03	2862.15		2772.8	12187.2	5842.67	8438.61	4524.09	6735.34	3171.14	12752.6	3543.47	11384.7	3655.33	1991.41	10504.4	7654.72	6810.78	3178.8	3717.08	4382.87	4148.64	4159.33			18298.7	5545.41	2174.21		7450.44
A0A0J7KP34	Cilia- and flagella-associated protein 126	98293.8	4626.27	220772	160897	3172.93	125563	172418	50905	161883	2916.45	134641	76298.9	62353.5	121951	54741.6	12875.8	76310.6	113340	66568.2	26134.5		105304	40250.7	4031.28	66257.6	48776.4	143501	1641.59		13521.5	68069.4	176211	10648.6	89773.1	61657.6	41363.9
A0A0J7KP43	Stress-activated protein kinase JNK	1599.33		1902.52			1202.3	1497.33		989.741		2803.16	2015.49		2021.38	1063.88			2029.38		1340.5		2322.01					1599.72				1795.61	2374.13
A0A0J7KP50	Dihydropteridine reductase	2807.19		8362.42			4261.4	4732.06		2471.25		1924.83	1239.01	791.08	2220.36			688.381	7231.09	3898.13	1583.08		1262.87				913.24	1787.12				2060.42	9911.13
A0A0J7KP51	Dynein heavy chain axonemal-like protein	7192.63		13847.3			7175.64	9901.07		12612.7		10716.9	9667.58	10212.4	7313.31	7819.25		9554.86	8018.14	7230.62	2582.61		10897.5	3139.76		11064.5	5455.75	14598.5				8521.65	15246.4	2697.67		30981.4	4189.84
A0A0J7KP57	PNP_UDP_1 domain-containing protein	233.598		249.046			442.113	96.4202			527.581		370.393		341.522								668.264						527.234
A0A0J7KP63	BAH domain-containing protein	277249	28985.8	342226	11971	13441.3	356457	285054	132362	392442	27829.4	401744	164698	248915	179491	180416	36469.3	222378	388664	167806	41380.4	13461.8	289768	98142.2	18682.6	156770	124448	281744		5152.56	77112.1	244409	702414	67708.9	554316	67661.4	295393
A0A0J7KP64	Cytosolic non-specific dipeptidase	32200	3692.08	101247	34315.6	55806.1	56932.7	39956.4	46926.9	49649.4	6275.58	51882.1	20948	11494.4	37038.4	25728.4	48183.6	51211.1	55359.4	44781	109764	17569.9	35003.9	10244.3	77592.3	34136.9	7985.2	47795.3	9831.93			35626.8	87728.4	6628.45		13518.4	35247.5
A0A0J7KP67	Mitogen-activated protein kinase kinase kinase 15	429.776		886.22			235.414	173.234					246.905		313.558				589.124														961.185
A0A0J7KP77	C-terminal-binding protein isoform x2 (Fragment)	1009.75		674.536			227.563	125.074		367.848		902.146	356.171		766.668				649.993			2080.97											2024.77
A0A0J7KP79	Odorant binding protein		1097.53	6405.33			1177.26	470.738		277.34	1508.61	540.55	815.142		981.618				4247.58	1726.31	815.079				436.389							2587.97	1757.02
A0A0J7KPB2	Dehydrogenase reductase sdr family member 11-like protein	38597.2	23855	37938.1	18195.9		52772.9	5439.72	37947	2903.88	33894.6	7188.09	116904	23418	54953.2	7478.73	5559.99	18694.3	49292.6	40181.4	13737.3	122041	6395.22	38788.7	10618.5	18435.8	6644.92	18540.4	25749.4	11137.3	63831.9	115134	10834.1	9911.85		4728.23	13444
A0A0J7KPB8	Charged multivesicular body protein 3	2174.76	1573.09	1553.25	5186.18	5465.53	4517.5	4482.96		2167.88	1460.49	2606.12	2779	2082.25	3926.89	1966.71	6179.17	5021	815.089	2641.25	11093.8		6757.74	2049.98	6010.63	2986.83		4358.57	3572.12	2988.24						1694.12
A0A0J7KPC6	Fidgetin-like protein 1-like protein	758.238	2364.4	2554.18			328.013	266.932		328.774		1076.8			645.986				576.321													562.512	1357.9
A0A0J7KPD5	Dynein heavy chain axonemal	4338.21		19701.7			3907.77	5847.89	7269.79	5166.8		4041.75	3525.99	3566.53	3494.62	3328.92		3026.13	6253.32	3956.09			6266.09	3992.23		7317.85	4667.9	5740.05				7217.46	7080.83			1880.58	6645.1
A0A0J7KPD7	Cyclin-dependent kinase-like 2 protein	515.045		4025.83			780.521	1110.61		1101.88		931.183	1072.28	1641.27	551.847	586.142			1002.91	2119.78			668.861					733.301				1018.32	4380.1
A0A0J7KPE3	Polyribonucleotide nucleotidyltransferase	3029.74		3711.43			1994.91	2745.02	3053.38	2885.53		2801.14	2686.78	3170.92	3272.55	3923.97			2001.86	3604.25	1125.47		3611.83	3349.83				3454.75				2364.17	3927.3			2533.78
A0A0J7KPF9	Phosphate carrier protein, mitochondrial	55514.9	6969.02	23617		3777.79	39797.3	28972.2	14741.7	40102.1	5130.26	46823.4	22028.7	23804.8	31640.6	20619.2	28008	21030.2	32757.9	23365.7	1621.67	7116.17	39261.1	42245.5		36493.6	71168.1	37546				22625.6	64432.7			37811.8	48730
A0A0J7KPH1	Protein transport protein sec31a	3775.51		1825.35	2587.14	3157.27	2373.09	901.679	3889.15		3237.56	2682.5	4453.34	3644.1	3042.31	3048.34		3037.31	1475.75	3895.19	4833.16		5769.63	2976.4	3778.47	4825.22	4985.39	4017.54	10743.7			639.579	4805.32			7108.18
A0A0J7KPI7	Chitobiosyldiphosphodolichol beta-mannosyltransferase	13937		1880.31		3209.65	6716	6243.55		7963.6		7688.94	7452.76	5984.45	2065.7	9813.35		10555.5	4867.57	7529.12			4488.87	1245.84	3807.39	5825.48	3117.75	8666.12				10256.6	16418
A0A0J7KPI8	Ferric-chelate reductase 1-like protein	1401.99		1327.94			1047.92	1972.48		1619.54	2837.04	2271.56	1515.32	2073.27	2433.04	1468.22		1240.66	2125.33	2735.58			3643.98	1567.49	1358.14		2486.79	1341.54	3321.77	5674.09		1551.04	5557.78			4110.68
A0A0J7KPJ5	Phospholipid-transporting ATPase	2037.99		4080.39	6017.02	6764.91	1604.51	1078.32	7317.85	1672.93		1945.69	1366.07	2376.92	2169.14	2714.9	6615.03	3027.95	900.79	7745.87	4178.78		1738.88	624.35	5957.82	2894.38	3225.6	2566.42	1581.17			1438.53
A0A0J7KPL7	Copper homeostasis protein cutC homolog	1604.99		2306.04			1402.65	944.548					2884.86	2569.92	1430.36				1287.45								1700.8	5634.89				3643.52	3244.58
A0A0J7KPM0	Dynein heavy chain axonemal (Fragment)	14068.8		30631.2			12937.2	17916.7	4615.3	16643		15433.5	8517.99	5263.37	11112.6	3985.39		9443.05	15685.1	7192.79	2129.41		14733.2	5139.95	1682.87	5986.28	12685.3	12883.7				13614.1	34485.1			7163.76	4177.35
A0A0J7KPM9	Transcriptional regulator for cysteine regulon	4644.63		4274.28	1847.93	6606.37	20077.7	4770.7	2968.51	4600.05	40786	6325.56	4089.15	3633.19	4537.2	7060.47		6809.55	4431.22	4600.81	6509.11	21643.8	11499.6	2501.21		3842.62	4676.34	10387.2	11859.5	20295.2		3167.67				5109.45	1795.99
A0A0J7KPN5	Cytochrome c oxidase subunit		3407.76				704.156			216.985	1945.01		1452.32	1162.52	643.024				971.382		1780		2754.6		3820.39			818.567	4566.66					3875.8		3158.51
A0A0J7KPN6	GDP-L-fucose synthase	1131.01		1374.46			817.734	773.186				1070.71	1392.98	1240.59	1989.61	1290.59			1013.41	1092.82	674.313		2439.16	357.091			846.669	735.793				2061.35	3815.28			615.583
A0A0J7KPP3	Protein transport protein sec24c-like protein	7571.44		14648.6	2535.12		5487.79	601.442	2992.54	1172.73	2960.35	5677.24	9929.63	5058.2	7861.61	4324.15		4126.93	7061.9	4663.48	2168.3	4707.36	11619.5	2914.37		2365.16	5250.57	4278.36	3247.99			5399.1	12905.3			5092.8
A0A0J7KPQ6	Serine threonine-protein kinase haspin-like protein	10267.6		15675.3	4083.06	7290.42	7659.98	3716.17	12495.4	4396.6	1163	9024.38	14923.2	11199.9	10917.9	9104.91	8176.76	8981.23	10971.1	11885.2	8584.06	10368.8	12552.1	16527.2	5489.88	12222.9	14002	6653.59	1953.68			11391	11947.7			14331	17319.3
A0A0J7KPR5	Nucleolysin tiar	755.934					375.811	392.072				519.445		465.074	423.703				1129.39													974.543	2113.83
A0A0J7KPS3	DUF148 domain-containing protein	415578	19664.1	591838	729219	855237	736236	612068	1499340	700127	21167.1	771205	385332	287527	575447	193604	1176670	1054360	388108	815566	2358430	55394.5	714517	204059	1742530	884045	377234	788406	5168.71	2898.47	570377	162427	347522	321515	492940	536210	353823
A0A0J7KPS4	Trna modification gtpase mitochondrial									667.24
A0A0J7KPT9	Serine/threonine protein phosphatase 2A regulatory subunit	1263.19	1086.76	2820.2		2627.43	1238.13	923.222		1195.53		1851.93	1379.09	1832.61	2732.79	2036.08		1936.22	1415.59	2049.86	1603.48		1987.83	1597.91	1837.25			1906.05					3352.56			5734.88	5128.2
A0A0J7KPU4	Lim domain and actin-binding protein 1						118.11				595.801																		1836.98
A0A0J7KPV3	Nardilysin isoformx2 (Fragment)	14681.5		18366.7	54984.3	51359.4	24740	18798.9	83304.5	18125.3	1305.69	22362.9	15256.2	23690.4	20342.2	13246.7	84137.9	49667.1	10152.9	47841.4	79873.3	8200.5	19696.2	28275	55296.4	59429.9	32790.6	35548	2661.8		47359.8	11692.8	24469.6			26493.9	36913
A0A0J7KPV5	WWE domain-containing protein	7424.64		57791.1			9353.62	12946.7	7448.03	9211.04		4360.18	5184.64	17295.2	7487.39	9956.02		4668.2	7681.89	5200.86	3255.64	3003.35	7203.01	7720.49		9154.73	7068.74	14852.2				5883.41	10679.2			6943.49	3416.69
A0A0J7KPW0	Ribonucloprotein	1716.72					834.493					681.998	2944.99	1257.5	1936.95	1536.9		1602.72	2530.27	1471.4			1511.72				685.07	1494.34	3257.25			1719.36
A0A0J7KPW2;A0A0J7KPW3	Cytochrome p450 9e2	1319.46						380.863				1099.64	2454.06			1089.66
A0A0J7KPX5	Neuralized-like protein 2-like protein	754.104		1174.22		721.314		498.809		1075.58		761.694	331.395	408.826	424.448	723.419			392.852	903.819	874.216		792.428
A0A0J7KPX6	Laminin subunit alpha (Fragment)	2283.53		2065.19			1759.61	513.116		307.311	9613.32	6555.3	5092.45	1456.53	5271.41	1418.53			5083.76	1430.4		3182.89	2302.49	2277.95		1757.49	4315.84	4117.99				3385.65	7394.09			1361.68
A0A0J7KPY0	Chromodomain-helicase-dna-binding protein mi-2-like protein (Fragment)	456.305		482.766								296.882		645.239					314.655
A0A0J7KPY2	Serine proteinase stubble										1684.97
A0A0J7KPZ0	Elongator complex protein 2	534.101		328.764			146.918			58.2764			597.524	355.474	228.114	147.138			243.645													521.961
A0A0J7KPZ1	Tyrosine-protein phosphatase non-receptor type 23	910.123		491.976	1519.3	2699.64	926.133	634.527		629.556		991.562	1817.9		1400.59	1297.97		1971.2	937.234	2358.97	1795.89		2457.34		1905.45	4484.64		1651.15
A0A0J7KPZ7	Inositol oxygenase (Fragment)			658.14															266.585																	1348.12
A0A0J7KQ00	Developmentally-regulated gtp-binding protein 2	512.172		1779.75			638.635	199.07				264.251	949.84		263.691				736.177														1128.02
A0A0J7KQ03	Alpha-tocopherol transfer protein isoform x1	2760.66	3996.59	1059.02	896.112		1390.01	370.711			8934.86	1872.8	5068.37	1365.07	1860.57	2387.01	1880.81	1666.11	2075	3382.28	1903.73		5358.68	841.917	2020.74	997.021	2241.27	656.327	10011.4	4488.76		6234.96		1203.44		1273.77	3529.86
A0A0J7KQ05	Coatomer subunit beta	3769.25		2476.31			804.902	684.657				1322.67	2668.68	930.677	2624.45	1985.64			1988.29	2828.69		11527.3	2747.84									1895.03
A0A0J7KQ15	Alpha-glucosidase						2170.04				438.676							914.328
A0A0J7KQ17	Phosphoribosylformylglycinamidine synthase	2501.31		3847.88			2528.91	751.461		583.352		2530.31	5651.36	1787.11	2526.2	1376.58	2820.52	1916.15	5659.01	4468.06	6538.29	4097.32	3254.27	1530.86			997.172	1072.38				6586.09	2774.43			3875.31
A0A0J7KQ19	Carboxylic ester hydrolase	4463.15	7597.18	15214.9	12092.5	5074.48	7669.4	1286.62	18021.2	2551.43	8072.62	3461.25	10459.7	4881.68	2866.51			5261.81	2706.39	16184.7	9231.9	8639.63	2279.97	13124.2	4229.77	6929.92	2219.33	2841.1	13280.9	15549.5	40302.1	5636.08	3309.78	8155.65		8616.11	8702.17
A0A0J7KQ20	Tar dna-binding protein 43	662.75					359.673						668.214	410.817	479.962	498.395
A0A0J7KQ30	Cytochrome b-c1 complex subunit 6	1471.64		2581.84			2803.92	2521.54		2587.46	1582.2	2082.88	936.682	8105.7	1906.97	1933.95		1283.64	2560.75	2487.18	1332.01		1838	3005.32				1039.42					3562.71			1128.9
A0A0J7KQ34	Sister chromatid cohesion protein pds5-like protein b-a protein	2421.41		2471.7			806.691	388.589				1598.6	1729.98		2687.18				2470.57			2202.6	2805.05									839.14				2565.39
A0A0J7KQ45	Carbonyl reductase (NADPH)	42400.2		63246.4	69221.1	73227.4	59863.9	56307	121784	51564.5	5145.06	76387.4	57661.5	52283.3	63075.1	39415.4	128386	87480.5	43482.5	102324	96176.8	18443.4	84492.9	69750	115998	81278.7	81933.8	77401.4	11070.5	3161.65	78125.1	41506.2	42282.2			43292.3	84875.7
A0A0J7KQ60	Cklf-like marvel transmembrane domain-containing protein 4-like protein (Fragment)	41688.6		37522.3	101861	129460	55054.4	57346.4	112535	47196.4	2895.69	66017.8	35464.9	71710.5	52421.1	53748.4	101697	93593.2	27307.9	121299	54786.8	7945.29	75286.3	37809.9	196839	103185	73641.2	60254.8			46664.3	44500.3	40626.4		139793	36029.7	103119
A0A0J7KQ63	Dolichyl-diphosphooligosaccharide--protein glycotransferase			1051.69															743.215
A0A0J7KQ68	Phosphorylase b kinase regulatory subunit	640.671											743.415						1311.61													966.025
A0A0J7KQ82	Atp synthase subunit mitochondrial	8494.86		3649.04			4973.64	6516.48		7307.25	971.351	5703.22	11868.5	11371.7	10707	16249.9		3627.15	7912.98	6358.36	2687.05		8218.03	5918.29		5297.71	11597.5	10619.5				13747.2	8328.21			8534.89	3737.09
A0A0J7KQ86	Phosphoribosylformylglycinamidine synthase	2509.81		8791.89			1944.91	747.247	7259.36		3642.28	2174.75	6764.56	2124.65	4111.4	1582.66			2349.22	6056.3	2725.78	8330.87	4213.02	4892.91			4749.01	2471.23	2832.77			3550.28	3442.53			7088.48
A0A0J7KQ93	Protein fantom	25416.1		32463.9			20470.3	31274.9		30365.5	15557.4	29062.2	19625	14071.6	21663	18531		17450	21247.5	17869.7	5575.42		22621.5	17770.8	4837.42	13863.2	18949.2	23705.5				17528.1	20131.1			17651.9	32252.9
A0A0J7KQ95	Palmitoyltransferase	6004.58		9300.05	11710.4	12559.5	5294.01	5235.72	10323.4	4932.88	1838.9	7146.31	4704.81	5983.56	5631.36	7774.67	11444.5	11311	5045.32	11409	8298.41		5998.05	940.574	14229.6	10205.1	5644.45	8091.42	5668.96	4282.83		10132.7				2263.33	14860.5
A0A0J7KQ97	Congested-like trachea protein	2058.53		856.104			1169.71	863.096		1100.56	4716.06	1068.59	1807.91	2758.51	2251.92	2672.28		1469.16	1658.41	2670.61			4734.23	3461.77		2924.18	5393.61	2787.37	753.433			1940.71	2236.64			1661.96	4648.8
A0A0J7KQA2	Serine threonine-protein kinase 11	2009.18		2338.49	6792.74	5820.24	2595.89	2825.04	2329.6	4502.45		4282.98	1301.39	3032.9	1552.75	4379.02	5138.06	3994.48	1552.9	6785.22	5326.12		2845.7	1687.8	10641.5	4055.1	2089.59	2774.63				2666.7	904.854			1203.98	2824.94
A0A0J7KQA3	Was protein family 1-like protein	500.175						206.744				599.067	447.805		389.747				644.714
A0A0J7KQB8	Glucose-6-phosphate 1-dehydrogenase	13373.3		39110.6	4987.17		11751.1	3384.29	23114.8	1373.67	6417.42	6163.18	30568.2	11889.6	18534.1	9057.06		7075.61	17934.8	16758.6	11255.2	16498.8	18462.8	9108.42	2366.11	6481.44	6252.24	9306.18	4994.73		65507.4	17930.7	36688.3			5881.73	9633.87
A0A0J7KQC0	Acidic mammalian chitinase	10451.3		4975.73		4638.49	4801.54	11258.3		8530.88		7361.92	9621.42	5472.17	8306.01	11469.2		3448.66	5591.34	3883.43	4004.2		4478.09	1312.25		4873.75	5727.69	6772.84				10999.1	2950.84			1795.15
A0A0J7KQD3	Polymerase delta-interacting protein 2	1050.36		822.094			907.205	1117.5		1425.15		1193.08	1482.47	1932.04	1397.94	1302.22		1159.7	1591.08	1629.37	1215.91		1607.8	1334.34			2345.86	2085.24				1336.85	5240.97			1789.77	3854.55
A0A0J7KQD5	Flavin-containing monooxygenase	4198.72		8296.82			4318.16	1365.87		232.607	6279.99	3054.22	2403.85	3244.26	3614.87			995.444	4275.15	2178.57		11234.5		3534.17				1801.2					11246.1			4468.07
A0A0J7KQE6	Protein dpy-30-like protein	10163.1		7721.93	1920.15	3001.74	8868.65	10109.3		9409.3		7855.81	5544.45	17180.1	7723.4	12404	6047.8	8733.84	5660.45	7532.74	8622.93		9134.64	7358.8		11283.9	12781.5	15164.9				7274.19	20210.5			9805.34	11604.3
A0A0J7KQE7	At-rich interactive domain-containing protein 4b	1673.86		1732.49			603.202	1676.21		599.573		981.218	1794.51	1511.14	1337.94	2102.8			1199.08					6504.64			5096									3046.71
A0A0J7KQF3	5-formyltetrahydrofolate cyclo-ligase	138.173		756.373				84.5157											236.365														1025.14
A0A0J7KQF5	Sulfhydryl oxidase	13689.7		20219.8	1465.19	2512.56	29578.6	36860.1	3694.09	22223.4	1140.81	22686.7	19277.2	10059.1	14493.7	5727.84	3347.55	15828.1	12884.1	26899.7	8132.22		9538.55	17465.6	4310.22	16797.7	10988.3	22034.3				35605.8	12549.8		107153	13060.6	9779.64
A0A0J7KQH3	Testis-specific serine threonine-protein kinase 4-like protein	13571.9		13531.9	3766.49	11300.4	9771.05	10559.9	9970.41	12544.1		12698.1	10378.1	11918.3	11382.4	19225.6	15123.3	10688.7	11591.8	20153.9	7777.22		13526.9	7749.61	5360.19	18716.9	14737.3	15837.3				11636.1	21036.5			12020.5	16361.1
A0A0J7KQH5	Organ-specific protein S2-like		1968.7	663.532						728.756	19199.5																		1807.88	7601.13
A0A0J7KQI0	Histone acetyltransferase type B catalytic subunit	16406.6		28696.7		5033.77	10856.2	15830.3	4901.89	20910.5		17788.2	10830.6	9797.61	11019.6	7140.94		6312.02	16900	10047	1036.17		13182.7	4688.94		8988.49	9418.03	13044				12903.8	16722.1			9447.34	3660.64
A0A0J7KQL9	Aminopeptidase n										13604.3																		4135.86	26324.4
A0A0J7KQP2	Aminopeptidase n						50.0777				3045.52																		2109.07	7901.71
A0A0J7KQP7	Nucleoporin nup188-like protein	1984.87		2443.62			1277.32	890.523		1410.65		2326.27	727.267	1573.5	661.035	1140.1		4070.44	1623.57									2022.84				1710.13	2110.75
A0A0J7KQQ5	26S proteasome non-ATPase regulatory subunit 5	10217.3		21093.7	11723.4	11882.1	10000.8	9075.33	16735.1	13196		19714	6933.5	9252.52	7400.96	3267.28	18591.7	9470.92	13143	12868.7	14265.4	2128.6	7568.4	5413.52	12249.1	11928.4	11334	11040.9				20481.5	20433.7			6009.48	18984.5
A0A0J7KQS5	Mitogen-activated protein kinase kinase kinase			1142.24									718.164
A0A0J7KQS9	Radial spoke head protein 9-like protein	3300.72		1704.81			1897.79	1398.12		2029.42		2709.58							1817.07									1302.76
A0A0J7KQT0	Dehydrogenase reductase sdr family protein 7-like protein			829.103				145.529				192.573							369.43
A0A0J7KQT5	Glycine cleavage system P protein	1220.13	2092.76	1894.61			871.763	410.599			17108.9	829.89	2045.49	1877.26	993.405			2203	1100.71	4078.47			1033.32	2711.42				4244.65	1840.67				960.057			4118.23
A0A0J7KQT9	Endosome-associated-trafficking regulator 1						236.221	240.731		352.278	2723.31				169.02
A0A0J7KQU2	V-type proton atpase subunit h-like isoform 2 protein	3053.94	2464.19	3762.06		2397.97	3622.46	1387.55	25012.6	1117.37	2337.61	2553.99	3627.39	2823.77	2562.9	2251.44	2185.32	1926.97	1975.98	3366.09	2706.51	11652.5	5166.4	2416.15	2442.17		2467.64	3569.1	4678.83	2912.51		5244.65	2014.67			4819.56
A0A0J7KQV1	Eukaryotic translation initiation factor 4 gamma 2	505.422		1327.87			112.938	259.569		282.945		544.396	627.659	270.06	315.807				661.929			951.942	614.665
A0A0J7KQV2	UV excision repair protein RAD23	191317	7537.51	418058	451376	388889	261014	237725	209987	241799	13977.7	269831	129183	220938	139482	178388	244494	274965	200868	267988	521989	8950.88	60913.4	28989.4	453811	180608	82741.8	216946	8572.54		54955.6	148829	363326	7284.29	374367	62579.3	130188
A0A0J7KQW1	Aminopeptidase	7832.1		9181.33	3708.95	6171.19	7740.47	4040.74	4314.52	2611.65	1057.92	6197.08	8927.23	5903.13	6868.24	5278.66	6207.26	4133.51	8233.03	7491.26	3828.74	3679.65	8969.32	6039.38	5435.49	2951.21	6030.52	5070.62	2428.72			11636.6	9823.46			8686.1	6302.05
A0A0J7KQX0	Histone-lysine n-methyltransferase 2d-like isoform x1 protein (Fragment)						1226.57		17098.4		1190.92			453.303	2616.7				1081.58		3171.46							2678.77
A0A0J7KQX9	Pyruvate dehydrogenase E1 component subunit beta	671753	32330	845715	34848.6	43158.8	625749	681431	282666	625552	15300.3	795232	706750	971956	531872	657261	134770	576272	449215	553811	269085	11038.6	635134	532466	61903.6	661315	580413	797980	7004.3	10926.9	548061	660050	698922	12419.2	309933	847455	994710
A0A0J7KQZ1	Kinesin light chain (Fragment)	4015.77			1356.87		1153.78	1501.08			828.066		2552.16	1551.27	2256.28	1280.43		2364.84	1752.6		1125.77	2085.85	4433.7	601.367			1925.41	2318.33	1054.31							1407.08
A0A0J7KQZ5	Abc transporter substrate-binding protein	1586.19		2030.15			1932.19	3588.22		1869.87		1156.49	840.316	894.38	2938.43			981.736	924.908	2103.98	1166.88		1074.47	1217.98				4177.52					1089.09
A0A0J7KR00	Rab GDP dissociation inhibitor	5908.19		5037.03	2379.99	2117.04	5560.02	1897.03	18643.2	1978.04	3489.54	6577.28	9286.87	6563.91	8113.02	3832.73		5288.91	9914.76	5778.49	4098.44	10420	8290.88	9834.64	2535.52	6951.71	5119.5	3904.84	3664.34			8377.53	9192.72			26568.1	6209.78
A0A0J7KR07	Uncharacterized protein	1106.27		1678.75			1595.76	1679.05		1600.51		2339.25	1920.69	2308.24	1317.65	1613.42		1242.22	562.411	1439.97	1355.64		1745.59	1916		1708.28	1472.3	1405.09								2126.21
A0A0J7KR13	Thyroid receptor-interacting protein 11 (Fragment)	1733.48		1073.16			4266.68	2785.89		2760.85		2850.05	2881.17	4623.81	3349.34	2466.06		4331.92	757.309		1837.79		3944.23	1051.54		8615.45	3952.99	6191.52								4026.73	8469.16
A0A0J7KR37	Protein arginine n-methyltransferase 3-like protein	955.58											627.238																				1227.21
A0A0J7KR59	Calcium calmodulin-dependent protein kinase kinase 2	213.226		441.517			210.376	59.4561		109.898			466.847		347.975				256.604				676.333									262.593
A0A0J7KR60	Dynein beta ciliary	8078.94		1104.17			5983.16	2779.51		2880.61		2037.05	1400.98	3412.66	1449.27	2770.7			967.48									2828.83
A0A0J7KR61	Cop9 signalosome complex subunit 1-like protein	2977.95		3136.3			2318.25	1795.99		2193.75		3060.19	2194.49	1658.76	2359.48	1766.13		2007.38	2560.46	3485.85			2886.16	1282.2		3088.15	2662.33	1979.47				2973.22
A0A0J7KR65	Protein opi10-like protein	2636.55		3098.23		3374	2777.75	1933.08	4963	2998.33		3990.42	1527.35		1956.13		5416.85	1463.37	2714.64	3148.54	5723.48		2377.95				1701.42
A0A0J7KR69	Nucleoplasmin-like protein	387.125		1247.13			749.028	243.461			4058.55		1373.35		753.49									2491.85				474.274	1355.76							5002.19
A0A0J7KR70	E3 ubiquitin-protein ligase	679.698		856.915			718.271	396.53		654.401		826.496	575.277		728.092	1086.74			544.26			499.392	633.203
A0A0J7KR71	Kelch-like protein diablo	1321.38		597.968				1222.74		1192.59				583.042	1412.42	1183.53			788.778				1482.82				1988.35	2171.94				838.545	3627.44				3170.13
A0A0J7KR77	Glutamate mitochondrial (Fragment)	160749	7157.95	251137	1968.19	2788.87	104370	156700	32004.9	196267	4118.69	200863	118286	170879	120277	222192	10767	89939.1	206326	75073.1	19386.2	2309.49	129633	24718.2	4107.29	97632.5	91754.2	103835	2855.15		22518.5	191552	214437	7566.39	192260	25551.1	115865
A0A0J7KR80	Large proline-rich protein bat3	1369.19		3604.27	5905.45	7065.54	1908.66	1906.77	6030.38	2632.69		2690.79	1525.26	1319.21	1292.69	1932.03	6296.62	4901.33	1141.53	4342.79	6773.47	4276.11	4599.1	677.998	7436.74	3383.54	3112.14	3935.37				1875.37	1767.26			1748.51	3795.44
A0A0J7KR82	Protein argonaute-2	4693.92		7503.3			3892.42	3473.68		3123.35		3540.94	5369.26	3442.43	3565.54	3741.01		2175.32	4432.93		1590.8		4798.05	834.716		3220.02	2882.02	3782.47				5755.69	4197.53		41453.1	1373.91
A0A0J7KR83	Amidohydrolase			305.085
A0A0J7KR86	Tubulin beta chain	550366	47289.3	993555	27873	29387.5	462816	709957	209091	571879	36828.2	617423	282491	362001	352241	358405	54356.5	363947	629985	275486	92025.3	26915.2	367827	149859	27970.7	282986	204069	430784	6070.8	5521.83	103603	387719	1212540	54304.3	455882	87778.8	164838
A0A0J7KR87	Tetratricopeptide repeat protein 7b	265.469		1074.14			901.001	955.815		558.245	907.686	339.659	471.663		399.065			983.476			682.816		1327.91				1512.34	1176.36				896.633
A0A0J7KR97	Integrin-linked protein kinase-like protein	2272.39		4010.9			1156.82	834.432				1896.11	4101.3	1014.03	4100.99	790.226		1497.28	1297.94	1199.63	788.125	6048.03	6900.77	1565.34		2918.49	3633.58	2557.1	1743.04			1755.32				8688.8
A0A0J7KR98	Uncharacterized protein	2382.4	106066	2272.34	729.391	3761.72	2592.92	2628.55			145121	1520.73			1564.92	2396.04	5550.71		1861.23	3647.58	4539.62				3050.08			4193.73	279959	275105			4828.35	67828.4		26724.5
A0A0J7KR99	Dna repair protein rad50			2701.11			838.652	1219.91		1764.2		2179.54			799.754																		2521.14
A0A0J7KRA2	Hemocyte protein-glutamine gamma-glutamyltransferase	605.987		4900.7			1072.43	382.925		594.354	1629.21	1060.17	630.253	811.193	1029.41	734.211			1535.39		870.807	8765.62	2823.41	903.699					1247.78			2908.97	3702.97			812.876
A0A0J7KRA8	Chitin-binding type-2 domain-containing protein		36071								51559																		7163.43	10803.2				7833.39
A0A0J7KRB7	Mitochondrial glutamate carrier 1-like protein	1083.01		917.385			2249.33	1313.83		1343.84		1218.77	2372.44	3206.09	3233.26	6211.78			1448.44	2939.86			3895.67	2750.5			3389.52		1404.38							2808.65	5539.96
A0A0J7KRC7	Reticulocyte-binding protein 2-like protein a protein	6901.77		11743.1			4649.86				539.352	130.98		5515.18	2903.56				272.854									3634.09
A0A0J7KRD2	Dentin sialophosphoprotein		142161		1633.42	2702.61	543.995				150831			459.254	200.664		3186.16			5193.93	13082.3	12361.2			8207.73			245.518	11360.4	23905.8				4336.42
A0A0J7KRD9	1,4-alpha-glucan branching enzyme	14722	3599.52	19914.6		1092.58	13712.6	3335.28	9547.16	1945.65	5980.26	9412.94	25586.4	14725.9	20402.4	6639.2	3810.61	5436.91	27766.9	9580.73	5619.41	19812.1	16643	19760.3	2478.91	5604.18	9729.28	5523.86	12621.5	3174.1	19731.8	25766.4	9133.27	3318		6864.74	5493.09
A0A0J7KRE4	Uncharacterized protein	23446.6		21663.9			23929.2	24489.4	8270.75	30266.6		28148.8	18964.7	20799.9	17833.7	32164.8		18893.4	21607.3	13163.8	5632.76		19747.2	23284.7		16547.5	25392.3	22593.5				15874.3	34803.1			12055.7	20528.3
A0A0J7KRE7	Heterogeneous nuclear ribonucleoprotein a2 b1-like protein	2451.87		4061.01			2789.87	700.969		414.353		2695.46	1558.36		2229.74				4451.6				2155.74	5082.87				1668.23				596.587	3532.4			27211.1
A0A0J7KRF0	Protein malvolio						700.924				8767.56					1269.19													4992.55	15508.5				1510.92
A0A0J7KRF3	Sodium-independent sulfate anion transporter										1902.37																		7530.53
A0A0J7KRF7	Band 7 protein					612.588	1236.45				4386.99																		4158.84	4717.97				5127.37
A0A0J7KRG2	Na+ h+ exchange regulatory cofactor nhe-rf2-like protein (Fragment)	3814.67		9772.24		1566.61	4132.21	2850.09	4893.93	2270.8	1145.76	3590.09	1064		1993.15	1210.27		1941.33	8704.27		747.99			1657.48		2741.37	3381.35	5940.82	2606.4			8872.18	1346.34			940.997
A0A0J7KRG6	Vesicle-trafficking protein sec22b-b-like protein	2041.82		4908.39			1304.79	723.717		647.495	1783.22	620.965	2544.4		2443.65	850.966		1701.32	1383.79			3311.87	2624.32	1874.44					2395.12			702.129				873.962
A0A0J7KRG8	Actin-related protein 2/3 complex subunit	4368.7		3682.8			2853.71	1335.96		2089.36	1505.73	3094.47	2532.44	1282.04	3031.39				4517.03	2619.2			4314.15	2039.48	2975.86	1990.16	2525.01	1747.25				3564.99	2624.59			1196.42
A0A0J7KRH7	Nucleotide exchange factor sil1	414.391		2414.11	714.063		787.372	276.556		510.831		444.127	747.443				1905.09		740.933	881.025												726.219	1380.54
A0A0J7KRH8	Mitochondrial import inner membrane translocase subunit tim23	2179.24		2319.41			3714.65	3000.81	12485.5	3227.86		3697.71	1991.31	1731.16	4397.27			1657.36	3629.78		7250.39							3923.21					5958.82
A0A0J7KRI5	Pre-mrna-processing-splicing factor 8-like protein	734.758	2769.84				453.718					500.182							501.604
A0A0J7KRJ1	Coatomer subunit beta'	2879.46	10363.6	3028.93	7539.12	1699.12	2256.82	1060.83		783.456	3066.92	4565.82	3163.29	1435.04	2057.57	1421.63		3316.42	4338.02	1722.61		8070.02	3348.53	5312.36		1568.76	1018.22	1871.64	6140.06			5132.54	6267.92			5207.57
A0A0J7KRJ3	Chondroitin proteoglycan-2-like protein		2740.2							80.1749	7111.4																		3983.54
A0A0J7KRJ5	N-acetyltransferase domain-containing protein	8911.01		6469.11	7585.35	8085.44	11530	7625.36	14675	11128.1	1413.63	15660.8	3740.31		6318.71		11200.9	13729.9	6883.55	9105.96	25230.7		12206.3	4341.65	19372.3	7415.32	2766.8	12892.3				2256.93	2059.74
A0A0J7KRJ7	Putative oxidoreductase yrbe-like protein	46692.2		71093.4	2521.54	2446.65	113060	34386.5	60445.9	10620	32978.7	48595.9	213025	44942.2	107027	34800.3	7251.84	56870.3	126524	124130	13839.9	9952.74	47130.8	165855	4513.36	22467	78738.3	34761.5	3092.02		78209	116250	49113.3			69570	36106.5
A0A0J7KRK0	Mitochondrial intermediate peptidase	504.787		1177.45			355.823	256.422		359.642		449.386			409.62				319.385													825.915	1195.4
A0A0J7KRK4	Trans--dihydrobenzene--diol dehydrogenase	25197.7		27995.8	6951.22	4985.71	26704.5	11486.8	22657.9	6669.67	5812.22	13631.8	40929.7	29592.3	41197.2	16878.9	8744.2	13183.3	28351.6	16110.2	14379.1	17885.2	13331.5	10886.1	7467.26	12049.4	12892.7	14650.5	9892.1		27068.4	43451.1	13389.9			11624.5	16924.8
A0A0J7KRK5	Coiled-coil domain-containing protein 39	99712		85510.7	37021.9	53065.9	102344	125170	88038.1	120101	18039.6	105641	82083.9	112046	100381	94023	97830.5	109130	56931.6	115656	65125.5	13540.3	90617.1	66047.2	41457.2	132429	137281	136598	3992.71		66562.8	82034.4	90136			85852.7	88393.4
A0A0J7KRL0	Hemocyte protein-glutamine gamma-glutamyltransferase	4417.64		704.699			136.793	29.7876								983.686			224.922				2380.01										454.729			2145.01
A0A0J7KRM3	Importin subunit alpha-4	1059.62		4073.45		1028.91	1521.51	1291.21	4680.42	926.545		1744.09	1183.74	1328.27	1033.78		2204.83	1966.42	1898.77		1726			322.749	1506.44			1273.53					3319.51
A0A0J7KRN1	Glutaryl-mitochondrial	545218	34418.4	554934	24096.1	26055	554838	544075	195638	767928	23255	641897	338765	281070	473464	178923	63283.2	422379	510231	291429	73776.7	8254.04	564874	211916	51645.9	329208	342269	656516	9272.82	4759.5	108111	225372	615519	11715.9	567733	112685	175291
A0A0J7KRP1	Ubiquitin carboxyl-terminal hydrolase 2			719.997															468.387
A0A0J7KRP3	GrpE protein homolog	2640.97					2112.74	212.965				12170.9	1924.24	1595.8	2939.75	2130.98		1906.66	1224.77	1847.11	714.531		1998.32	6697.43		2626.67	4553.25	3432.86				1291.45				3950.59
A0A0J7KRP5	MICOS complex subunit MIC60	182707		88146	5114.81		155050	113319	38535.9	189934	6502.92	161013	78405	60410.1	102445	26178.1	6497.02	80701	123972	67466.7	30569.2		91633.5	32753.2	12429	63719.2	36118.7	150630				65265.3	154945	6241.28		31219.9	85555.2
A0A0J7KRP6	Uncharacterized protein	627.74		1089.76			362.107	229.732		283.955		701.819	118.811		512.936				789.762				1057.57									493.197	744.291
A0A0J7KRQ1	ATP synthase subunit beta	274396	95371.9	332125	20390.8	14315.1	224587	361185	78317.5	196678	86426.8	161993	129317	187649	159249	154421	40031.8	97564.4	194039	83230.5	69270.7	32716.8	61612.2	57419.9	17541.6	102853	108737	185111	30829.9	12786.3	66429.3	196621	295881	38353.3	356242	40191.4	58226.6
A0A0J7KRR1	Protoheme IX farnesyltransferase, mitochondrial	216.866		1019.23				323.246		405.185		496.07			199.631
A0A0J7KRS1	Protein transport protein sec16a				613.168						1059.74																		678.342
A0A0J7KRS3	Serine/threonine-protein phosphatase 2A activator	6941.88		24467.5	8699.86	4546.37	9355.33	10284	7995.02	9323.89		10672.6	7831.34	11856.8	5619.97	14226.3	5622	7855.95	8145.37	6304.95	4524.25		5077.36	3828.37	5731.74	7106.6	11737.2	11662.7				8562.04	22772.2		38377.6	3606.67	17525.6
A0A0J7KRS6	Histidine-rich membrane protein ke4 2-like protein										697.64		730.898		491.423	539.491
A0A0J7KRT0	Mitochondrial import inner membrane translocase subunit tim17-b	5629.73		2138.49			10282.3	9590.17		8705.22		13524.3	9860.48	8542.98	17268.1	9881.06		8416.24	4042.98	12699.3	865.242		17620.8	11046		7782.18	8625.4	11454.8				2511.76	5961.03			2722.21	22415.3
A0A0J7KRT4	26s proteasome non-atpase regulatory subunit 1 (Fragment)							112.688						1271.25		1430.8					976.822
A0A0J7KRT5	Protein 60a						792.091						1215.25		770.426				814.474													833.96
A0A0J7KRT9	Protein tag-53			557.936				364.393					479.724	687.992		371.802			641.789													1264.08
A0A0J7KRU0	Extended synaptotagmin-2 (Fragment)	399.82				1004.71	484.869	208.685		553.285	653.135	624.033	648.008	711.948	1277.51	1100.52			537.073	1401.31			2079.59	502.433	1858.39	1911.34	998.052	887.307				2254.63				500.302
A0A0J7KRV2	Dynein heavy chain axonemal-like protein	19293.6		96114.1		6622.94	4437.75	11582	7709.83	13673		18155.4	23712.7	17856.6	27967.6	27788	2993.97	18235.8	7819.08	20537.3	3315.76		27145.9	10880.5	2107.08	26336.9	12259	27005.5			13311	15701.5	20591.3		29571.3	8498.46	21344.6
A0A0J7KRW6	Tumor protein d54	2356.99	3359.86	2486.48	2016.21	4487.01	4757.5	2140.96	4474.63	1569.07	2103.32	2847.28	5340.81	4300.25	4201.5	2742.65	6700.16	3805.67	2423.77	3179.58	6677.27	6758.32	8721.11	2967.96	3058.01	5061.23	4622.5	5142.67	4152.03			4929.41	1846.91	5403.9		4857.72	1824.28
A0A0J7KRW7	Lysozyme (Fragment)	11925.1		11647.7	14164.8	21543	18671.8	9599.44	12485.6	7861.01	2826.49	12077.4	14051.7	8438.66	9516.92	12347.3	26208.4	8919.88	9320.14	18380	57378.6		7880.9	11304.7	18560.7	10635.5	16404.4	17769.5	2562.04		12550	6631.3	14662.9			18054	19840.4
A0A0J7KRW9	4'-phosphopantetheine phosphatase	1915.25		2343.11			1093.99	1438.64		1319.43		949.252	1754.14	2931.51	1030.01	2044.85		1991.46	1615.98	2033.65				2440.97			1873.88	1751.17				2581.53	3686.47			2718.48
A0A0J7KRX4	Putative dynactin subunit 2-like protein	1024.24					1650.04	876.72					2610.33	1314.76	1857.27				226.243			3485.52	1702.24	2256.88			2304.4	2085.59								2602.47
A0A0J7KRX7	Ubx domain-containing protein 1-a-like protein	772.211				880.964	464.989	383.606		240.191		616.688			423.376	508.976			523.706		1031.21											1427.75
A0A0J7KRY5	Secretory carrier-associated membrane protein	762.908		1322.81			1332.6	429.046			2002.38	651.281				742.778			1104.17										1580.3	2206.34			1341.09
A0A0J7KRY6	CLIP domain-containing serine protease	904.9		754.657			550.016					413.804	657.603						415.597			3755.79										1019.01	1901.68
A0A0J7KRZ3	Nuclear pore complex protein Nup98-Nup96 (Fragment)	354.122		241.049				103.274				954.056	499.968	366.613	434.565				209.185							1719.8	1356.14									255.2
A0A0J7KRZ5	Fragile x mental retardation syndrome-related protein 1 (Fragment)	2753.36					3196.65	963.453					3908.39	2032.31	3563.92	1207.11		3106.4			2493.83	7290.99	5370.65			5627.49	4028.9	3367.97								2891.62
A0A0J7KS00	Nadh dehydrogenase	1458.5		1488.16			921.837	964.902		1088.49		1638.67	775.433	1493.44	1216.27	2698.97			1107.35					1193.27				908.402
A0A0J7KS11	Dna repair protein rev1	3227.43		2887.35			2907.12	2969.81	1974.24	3385.31	716.76	2210.49	1942.62	1903.45	1142.82	2129.76		2056.93	2842.15	1321.77			1973.69	806.237			872.507	3464.24				2044.26	4685.79				2338.67
A0A0J7KS12	Bifunctional 3-phosphoadenosine 5-phosphosulfate synthetase	1750.59		1281.41			764.888	498.487		284.612	1193.37	1231.31	2307.28	1628.81	2162.9	1585.36	1154.62	928.1	1340.8	2133.91	1228.57		3446.71	173.958	2200.9		1905.06	1195.67				1493.66
A0A0J7KS13	Cytochrome p450 4c1 (Fragment)	7447.18					600.429	1077.3		1677.99		3169.59			1438.28				1081.09				2032.26					1245.98
A0A0J7KS22	RNA-splicing ligase RtcB homolog			699.254															953.782
A0A0J7KS28	Long form-like protein	9790.71		804.306		1619.95					2172.63		38691.5	1338.29		3767.66	4255.5			5974.47		12832.7				24053.4		2365.32									2765.08
A0A0J7KS38	Cytochrome c1-heme mitochondrial	3842.96		8347.54			4046.08	6082.03	18090.9	6070.3		7130.13	3993.55	6113.33	4112.81	6407.3		4834.61	4040.96	5247.11	757.016		5253.21	3288.44		5692.83	6396.68	7558.54				3190.32	5453.93			4647.28	3255.33
A0A0J7KS44	Fmp27_GFWDK domain-containing protein	944.016		2071.64			1270.4	3091.32		3066.06		1435.52	494.891		1000.72			941.19	861.704				2036.56					1543.17				340.488
A0A0J7KS53	GMP synthase (glutamine-hydrolyzing)	10905.5		10940.7	14644.8	16715	12462.4	9575.98	18833	10957.5	2453.78	14764.1	9441.46	12432.6	9290.29	13712	22747.8	17507.5	9013.82	18794.9	19806.6	7284.53	10228.8	6337.64	18089	15675.4	14599.4	11018.6	4328.58		6648.58	14453.5	5397.14			10259.1	13582.9
A0A0J7KS58	GTP-binding nuclear protein	30348.5	20776	39306.8	98953	103395	58814.7	25154.3	74127.8	45150.7	11328.1	81674.7	41519.6	31128.8	36230.8	34995.6	90946.6	139839	17713.6	93712.1	133441	15642.5	68011	15819	130522	95874	50733.8	60932.4	10559.1	27311.8	74520.2	47518.7	27366.3	14423.2		33215.7	78824.1
A0A0J7KS69	NADH-ubiquinone oxidoreductase 75 kDa subunit, mitochondrial	88541.9	4932.82	115321	3786.76	3511.63	75349.6	77940.2	33083.1	113206	5550.56	88917	83556.1	93664.3	77724.6	85092.6	9328.37	65888.5	85635.6	46587.5	19364.2	5702.42	74896.7	33700.6	6706.38	68264.9	58970.1	90001.4	4927.26		25800.2	57439.8	85875.8	2317.04	159464	41378.6	88552.1
A0A0J7KS72	Carbonic anhydrase			673.871			748.646					877.768	1184.38		884.637	635.436							2844.68	857.522												1532.75
A0A0J7KS74	Lysosomal acid phosphatase (Fragment)										3818.12																		3512.04
A0A0J7KS75	Cuticle protein 6		2460.07								22488.9																		2023.11	4134.9				840.846
A0A0J7KS79	Enolase-phosphatase e1-like protein	1717.31	18204.5	3251.69	2754.14	4206.51	2860.23	1085.45	1987.15	1433.79	80655.9	2517.3	3053.13	3157.28	1984.66	3564.44	11470.2	6651.85	2306.76	7300.5	11370.9	4545.14	4231.06	10572.8	7997.96	5167.33	6655.29	2135.01	44315.8	23139.6				4135.67		28238.9	3282.52
A0A0J7KS85	Regulator of microtubule dynamics protein 1						160.799	177.591											331.921														1055.72
A0A0J7KS87	Dynein heavy chain axonemal-like protein	1309.97		4415.96			1146.94	1324.49		1655.13		2719.35	1198.16	1756.56	695.992	1192.99			2537.64				1581.12	196.156				615.09		3145.3		2441.51	2364.18
A0A0J7KS88	Cytochrome c-2	108126	6918.98	587817	13583.1	15406.9	103591	403100	38063	207743	39729.2	347862	104776	60565.7	118195	71352.7	61627.4	54216.8	227438	282374	46993.9	2873.4	147637	17157.2	15754	82002.6	65530.7	99549.4	28325		38702.7	65902.3	114194		257576	18950.2	75232.1
A0A0J7KS91	Ef-hand domain-containing family member c2-like protein	63096.8	3336.01	143196	2511.62	2924.02	62132.5	96911	20882.3	88164.2	3584.97	61120.5	45901.9	42120.2	44410.9	40783.7	7801.66	43131.3	75228	28313.8	6904.27		36026.6	21083	15800.4	43202	24035.3	68024.4	2115.99		27850.1	29597.4	189810	12253.5	167481	39778.1	46964.1
A0A0J7KSA4	Dihydrolipoyllysine-residue acetyltransferase component of pyruvate dehydrogenase mitochondrial	33762.8	3684.46	78279.4	2834.87	1859.87	32584.5	46192.2	13871.3	37545.5	1177.72	32526.9	28985.5	34931.4	24064.3	24412.2	5216.49	25910.5	33017.9	18722.7	8982.02		29120.9	13579.9	1663.42	23983.1	22503	37854.8			20036.6	25305.7	56373.6		141310	23496.5	23932.2
A0A0J7KSA5	AP-2 complex subunit alpha	2612.64		2748.59			2148	1029.78		919.441	3014.73	2192.62	3015.64	1820.7	2356.43	1241.01		2773.11	1986.84	1251.27	680.415		2571.08	730.659			6991.8	1995.6	3103.43			3181.81	5069.11			9305.72
A0A0J7KSC2	Pupal cuticle	2397.4	4235.7		1141.43						5877.58															1444.95			3018.87					1279.83
A0A0J7KSD2	XK-related protein	903.655		2123.63			591.577					786.332			848.867
A0A0J7KSE3	ATP-dependent RNA helicase DDX1	916.54		2348.39			694.813	629.795		726.532		655.907	1080.93	668.091	723.932	1120.54			764.13									997.557
A0A0J7KSF0	Ras-like gtp-binding protein										2622.22
A0A0J7KSF1	116 kDa U5 small nuclear ribonucleoprotein component	1242.95	14941.6	6753.47	9989.62		1259.3	445.92		822.28	1315.37	2882.08	1487.24	1733.18	240.477	1224.9		2452.95	2455.08					6918.17		5911.24			3547.37	7347.14			1479.83			1799.63
A0A0J7KSF4	Nucleoside diphosphate kinase	23921.1	26977.7	25113.8	16846.2	17053.1	30255.4	16520.2	23600	10554.3	101221	19850.7	35215.7	22144.5	28019.3	20280.3	23471.5	11878.5	29234.3	24676	36484.1	10878.3	18788.2	59775.8	13424.5	17931.9	24464.4	13194.4	6997.45	6143.31	23834	33658.2	18097.2			65670.2	7545.29
A0A0J7KSF5	60s ribosomal protein l44	5191.6		6572.01			8183.64	3467.95		3606.57	1344.86	6660.29	3186.12	420.181	9757.69			2621.28	5167.11	2077.75	2188.75		4451.66	1857.76			385.483	2820.74	1081.33
A0A0J7KSG0	Nuclear pore complex protein nup155 (Fragment)	852.652		658.154			504.552	309.285		715.669		1109.89	883.612	797.641	557.509	1028.39		1091.54	760.88				716.91				980.12									3270.72	1632.99
A0A0J7KSG1	Plug domain-containing protein	34199.6				1304.7																			3164.4			11572.8			25878.3
A0A0J7KSG2	Dynein heavy chain axonemal	41630.5		53648.7		990.772	31029.8	45094	8157.17	46097.9		33113.8	26514.5	25606.8	27311.7	42527.2	798.367	21053.6	29948.3	21357.9	3709.18		30190.1	11109.7		25781.5	15536.2	35253			10187	16533.3	58309.8		157389	10553.8	29112
A0A0J7KSG5	Camp-dependent protein kinase catalytic subunit	1196.61		1583.57			491.849			381.422		1057.64	717.785		846.954	659.483			1312.61				683.813	1070.52			1842.72	1583.41				1167.88	3344.1			2235.13
A0A0J7KSH2	Tom1-like protein 2 protein	3367.56	4126.94	5511.02			4239.56	1285.75		1225.48	8333.5	6327.27	5444.35	1755.54	4471.72	1831.47			5431.27		2220.37	7298.74	9112.18	3813.13		2288.7	3663.14	3663.81	17804.3	6988.04		5446.62	8503.1	2287.36		2337.33
A0A0J7KSH3	Clathrin interactor 1			1377.83			826.304	379.495			1929.05	1024.38	1254.18	464.87	843.79	645.252				1964.25	756.644		1217.31				1132.05	1095.09	5436.44							1080.18
A0A0J7KSI2	60S ribosomal protein L27a	5617.61		4182.84			4266.42	1110.92	6506.27	527.71	3580.53	2814.24	6436.9	5062.36	4927.73	2843.09		2800.24	4478.75	3635.44	2239.85	13014.3	8200.13	11161.2			5368.83	4394.02	5600.66			3370.39	6591.15			8909.05	5251
A0A0J7KSI7	6-phosphogluconate dehydrogenase, decarboxylating	5917.83	5877.01	9558.59		2213.11	3405.66	1479.15	17241	1247.69	4240.05	4104.7	10332.7	4312.9	5123.36	1979.15	1839	3587.1	6078.71	6920.91	5003.82	8780.58	3709.06	6676.87	1957.38	4714.97	4336.52	4504.7	5492.69	1866.19		4548.16	7896.31	3120.45		6096.6	4854.28
A0A0J7KSJ5	Prohibitin	47628.3	4292.62	37821.1	5232.2	2058.71	23111.3	36922.7	10142.7	28859.9	1608.59	29834.2	28530.9	38198.6	30798.6	37261.2	4485.49	17527.2	33665.5	15963.8	13020.3	7239.71	17867.4	28524.2	3071.72	21495.8	38598.4	30718.7	1134.16	1262.54	10916.6	38763.4	51565.9		69261.6	27341.5	27639.9
A0A0J7KSJ7	Reticulocyte-binding protein 2-like protein a protein	12847.4		17789.5	425.948	2094.88	14767.2	12341.8	7620.62	7103.65		14021.3	8677.58	8747.9	9441.56	4877.29	3395.8	14891.5	8618.49	16737.9	5041.08		11972	9359.63		14064.3	11046	21140.7				5141.45	16831.9		37670.6	6978.26
A0A0J7KSJ9	Secreted protein										16853
A0A0J7KSK5	Peroxisomal multifunctional enzyme type 2	2142.59	1381.4	378.309			596.534				1395.84	2871.34	1132.8		701.056				3097.27										372.711				3809.17
A0A0J7KSL5	63 kDa sperm flagellar membrane protein (Fragment)		1646.32								9374.23																		3535.32	3051.49
A0A0J7KSL9	NADH dehydrogenase [ubiquinone] iron-sulfur protein 4, mitochondrial	19390.2	2886.74	4761.23	1954.86	1718.11	8028.42	4793.9	17220.7	6399.93	3092.11	16565.6	12719.2	14966.7	13302.5	5746.59	6638.29	27462.2	19127.7	24301.2	13332		27213	6128.51	3802.26	41419.9	13315.3	26302.6	8214.42		11797.8	53601.6	11141.6		218717	8685.89	94789.8
A0A0J7KSM5	Collagen alpha-2 chain (Fragment)	850.694		6232.43			898.285	442.811		758.872		10456.6	3554.18		4767.74	2506.9		1800.8	6616.3				882.52			6406.32	3117.77	1526.74					2719.06			10394.7
A0A0J7KSM7	Proliferation-associated protein	5313.08		3488.19	1850.18		5513.15	1980.58	3697.75	1413.01	2861.64	4159.96	8864.22	4620.96	9812.98	4590.63	1857.95	4637.34	8306.1	3791.03	1529.86	4192.6	9507.27	9838.21	1618.1	5261.26	6406.33	3632.99	7123.87	8922.87		8555.75	3084.38			7781.81	3890.99
A0A0J7KSM8	3-hydroxyisobutyryl-CoA hydrolase, mitochondrial	14507.4		11679.8			6028.76	8296.03	6210.23	9464.97	4493.07	16939	10773.5	16013.7	11447.6	16748.3	3538.21	6924.29	14789.4	12886	5043.64		12572.4	5980.78		11537	17189.5	16534.2				11234.6	21317.9			16939.5	9818.64
A0A0J7KSN6	Glutamic acid-rich	5118.63	35578.9	9942.76	6242.09	5502.43	11092.4	4251.26	2971.99	4476.13	160247	13290.4	4942.64	3243.97	5487.45	3695.18	16743.5	7669.5	10886.4	10823.6	6388.24		14660.9	2966.35	10132.3	6511.29	3496.36	6636.07	90471.3	41804.8	7632.71	4881.43	15980.2	4842.71		3411.25	15233.5
A0A0J7KSN8	Pupal cuticle		9237.96								53133.7																		7934.72	13392.7
A0A0J7KSP3	Structural maintenance of chromosomes protein 3-like isoform x2 protein	252.036		1319.44						466.299		550.434			529.793																		675.7
A0A0J7KSQ4	Reticulocyte-binding protein 2-like protein a protein	29969.3		48452.6	10085.5		34152	38926	17431	26644.1		35045.8	23578.3	22825.9	27846.9	18803.7	11484.9	25597.7	30542.4	23055.7	8788.76		34605.9	12078.6	45010.8	25358.4	20625.7	38190.9				19003.1	40059.3			13783.2	22973
A0A0J7KSQ8	Ankyrin repeat domain-containing protein 13b			1196.55	2330.48	1485	1221.69	716.664		1549.09	1201.72	2385.35	1140.03	1318.71	866.357	1187.99	4634.14			2238.57	2006.25		2096.37		6025.7			836.667	1682.17	3121.63
A0A0J7KSQ9	Superoxide dismutase	162482	53939.6	227454	7553.89	11207.4	202089	203635	70020.6	166528	108347	228387	114193	173068	158944	190384	29217.5	170410	223842	82917.4	50512	5361	103723	41836.6	14745.5	105732	137507	200725	14806	11500.7		39551.3	203769	9394.38	894133	26803.7	134242
A0A0J7KSR6	Peptide transporter family 1-like protein	21479.7		5655.86	21971.3	58447.4	32388	17351.9	41609.2	26502.6	48993.5	2945.56	6203.49	12529.1	29992.5	16025.8	14639.9	12458.1	85959.8	21307.2	3512.69		10749.7	7686.86	52387.7	15958.6	17059.8	11824.2	70315.1	57821		51663	10732.4	27840.2	26108.6
A0A0J7KSS1	Thioredoxin reductase mitochondrial	63245.2	158001	64184.4	17551.5	33868.7	67057.9	59735.9	61987.9	51155	214718	102786	25348.6	11682.5	48101	7437.16	38165.7	62264.7	65011.5	71101.4	65158.8	7218.91	59697.9	20763.4	37866.5	28903.2	9959.27	44778.2	100255	65480.9		50122.6	67546.8	45789.5		11113.3	26045.4
A0A0J7KSS7	Ras-related protein rac1-like protein	3190.15	28037.6	5045.95	10514	3273.15	1595.15	2045.9		3641.94	5808.96	2070.53	1173.06		2542.82	1484.25	5230.23	3738.34	10453.7	2675.59		8212.94	1877.75	1661.07	2158.76	6564.26		3062.11	4806.49	6588.57						2043.85	5123.07
A0A0J7KSS8	Leucine-rich repeats and immunoglobulin-like domains protein 1 protein	1051.01	14183.9	6942.67			1287.32	2026.52	29450	886.307	15969.7	2295.64	4503.79	1084.64	2702.07	709.958			3011.87	4448.85				4964.26	5583.26		957.52		8915.52			4040.2				6423.69
A0A0J7KST2	Adp-ribosylation factor-like protein 13b-like protein	777.967					1303.07	1275.04		1504.16		2157.97	846.212	1483.79	609.773	929.281	4709.31	3468.82	594.537	2024.22	1419.66				3852.44		671.178	934.86				1377.95				910.487
A0A0J7KST6	NEDD8-activating enzyme E1 catalytic subunit			1176.67		639.672	553.134	215.62		286.192					816.324			404.005	616.532								628.843						1239.55
A0A0J7KSU3	Sorting and assembly machinery component 50-like protein	1114.52						1446.68		1142.05		806.829	1406.61		1204.16	833.593			1450.03									931.712				963.281
A0A0J7KSV0	39s ribosomal protein mitochondrial			399.099				310.498		360.833
A0A0J7KSV3	Exocyst complex component 8	576.245		309.162			468.958						560.276		533.277	354.849			325.699				369.204	853.016			347.426					899.632				694.035	16637.8
A0A0J7KSV5	Thioredoxin-like protein 1 protein	8683.07		2053.46	10526.3	5668.18	6161.5	2617.86	5420.04	4739.42	1897.23	7460.94	9344.34	4777.41	6349.58	4570.37	1901.49	5999.89	9543.89	9667.09	7073.62		11229.3	1449.9	7312.56	5319.06	3180.94	5006.5	1264.42	1642.87		16991.4	8960.31			2441.19	5901.16
A0A0J7KSW2	Zinc finger protein 800			1802.71			363.022	446.475		573.52		553.961											604.14				727.827						744.39
A0A0J7KSW8	Eukaryotic peptide chain release factor GTP-binding subunit	727.588	1761.16	171.581			752.555	413.055			614.171	948.243	856.754		850.781				735.465		662.428		1856.19	205.094				1056.75
A0A0J7KSX0	Clustered mitochondria protein homolog	782.275		806.409									708.198		331.765	261.008			317.152
A0A0J7KSX3	DNA polymerase	979.082					556.934	356.536				1096.43	536.835		1112.56			1404.05	681.975				1672.25					872.161
A0A0J7KSX5	Transportin-3	668.905		2239.16		2102.65	630.315	369.313		861.744		1317.05	415.89		443.128				786.679		1158.25				3240.91			1663.75				616.626	1526.72
A0A0J7KSX7	Dnaj protein 1-like protein			953.081				164.762		214.506		355.812							373.891														462.514
A0A0J7KSY4	Glycerate kinase-like protein	77239.7		106437	3921.18	4034.5	68881.2	77393.2	22253	83471.5	4406.16	78459.7	51394.7	59859.6	57312.9	47680.8	12382.5	43808.3	53460.1	41083.6	16061.3		56438.7	29389.7	5366.89	47860.1	39339.9	64995.3			31443	31978.9	109859			21617.2	45008.3
A0A0J7KT06	Pyrroline-5-carboxylate reductase	6269.03		5393.78	4991.57	5375.46	5029.64	6909.29	9335.63	5538.26		5318.22	3549.38	4611.71	3246.41	3100.78	3917.85	8338.77	3873.4	7809.54	9473.95	4226.76	2908.26	3485.34	6151.39	8488.59	4993.2	6841.48			2273.61	5962.33	8028.09			7013
A0A0J7KT14	Ester hydrolase c11orf54-like protein	3511.3		7584.31			2634.97	2693.08		2150.37	4527.35	5471.49	6842.81	2416.02	5812.51	3034.81			6679.33		1813.36		6407.65	3718.07			3538.03					5971.24	4168.36			14045.6
A0A0J7KT26	6-phosphogluconolactonase	22234.2		20807.8	37119.2	47834.5	26854.1	11369.8	56374.3	18049	2847.74	35429.9	11576.6	15688	11391.8	12202.2	53489.1	33172.1	13295.9	51695.2	61157.7	5749.39	15350.7	16409.1	50379	24807.9	23041.6	19039	1682.34		53571.9	28905.4	9654.44			20298.3	11935.8
A0A0J7KT27	Ubiquinol-cytochrome c reductase complex chaperone cbp3-like protein									701.887
A0A0J7KT49	Proteasome subunit alpha type-4	37815.7	26793.9	9397.14	78467.2	104521	46771.7	36370	72223.7	36600.8	77077.9	44237	35776.7	36831.9	42707.7	49357.4	49120.7	89445	23719	76884.7	136233	16593.1	32856	74599.9	59229.6	75989.8	23983.4	55531.5	14703.2	7571.72	78683.7	43725.3	24649.7	22782.9		131288	36050.3
A0A0J7KT56	Flexible cuticle protein 12	702.377					1536.37	1135.56		741.724	925.127	1350.34	1198.32	644.383	965.317				1890.76				2391.88					1453.09				1638.02	2425.69
A0A0J7KT58	NADH dehydrogenase [ubiquinone] 1 beta subcomplex subunit 11, mitochondrial	18289.1					10457.4	4645.4	4472.73	6288.23	1114.61	12108.1	11751.9	16619	9629.74	12459.4		16312.5	9553.62	16428			22955.9	32942.2		12560.9	35512.5	21384.5				15651	11877.7			25773.8	20071.7
A0A0J7KT84	Tubulin-specific chaperone D	1538.68		3248.29	6530.62	8998.44	1172.66	1000.68		871.313		2739.93	1004.01	2562.53	1098.11	1428.87	6524.8	3059.34	1857.44	8586.58	2900.91		3059.94	1388.53	5145.84	2526.28	4047.3	2337.94				3426.09	2329.82			2634.55
A0A0J7KT88	ATP synthase subunit gamma	8787.37	7819.34	11192.6			6157.88	13934.1	7791.41	8752.02	4374.3	9208.81	7900.59	6695.65	7917.42	9212.53		9543.72	9070.72	7143.23	4446.75		8396.87	12249.8		8225.26	10631.8	8486.39				9207.82	11748.5			9512.08	4649.48
A0A0J7KTA4	Dentin sialophospho isoform x2	465.126		300.766			154.949	108.628		61.5447	1028.41	397.304	603.325	280.587	275.648				288.744		249.109		357.804		471.29			326.83	629.295			802.099
A0A0J7KTA7	Transcription elongation factor b polypeptide 2	9778.86		9264.76	1181.04	1860.92	10100.7	12470.2	6360.51	8807.43	655.832	8084.43	7242.66	11434.1	9541.44	9298.02		9828.1	3868.72	8967.35	3638.55		8397.64	7609.94	1722.05	9274.49	8252.6	12818.6			2361.41	5193.94	12327.2		56208	10553.4	13737.5
A0A0J7KTD6	Hepatocyte growth factor-regulated tyrosine kinase substrate	13720.7		10519.9	75869.8	84344.5	19492.2	10401.2	88698.1	17370.3	3930.61	16523	10873.6	21267.9	11627.2	13601.7	57471.8	35384.7	8166.82	48515.8	70519.8	6632.93	9437.9	5182.37	90940.4	24275.2	47799.1	20679.3	6080.98	7010.84	38155.4	18066.4	10840.7	1012.49		24588.1	38179.3
A0A0J7KTF6	Syntaxin-5-like protein						1105.19			1859.7			632.435		841.087													1353.44
A0A0J7KTG2	40S ribosomal protein S13	16722.4	5737.15	6196.52		2110.08	7111.17	2194.1		4245.05	7790.45	8766.59	13759.8	5533.36	12595.4	4801.03	27309.9	6108.81	13933.1	6305.03	4637.66	14124.8	25636.5	7500.26		11464.1	5672.76	7329.91	4782.69			8199.47	14076.5			3923.39
A0A0J7KTG7	Suppressor of variegation 3-9 isoform 2	374.372		1157.39			270.752	149.057				167.923	383.187	289.569	119.111				151.384														360.565
A0A0J7KTG8	60s ribosomal protein l4	32655	13321.3	49359.1	26040.3		17705.3	10916.3	13067.1	9869.35	10334.1	21077	26916	24387.1	24896.6	13583.1		13729.9	40001.7	18347.8	8408.17	34480.7	35680.6	28961.2		18303.5	20787.2	15196.5	7080.26		19293	20677.3	17662.8			52977.2	22909.8
A0A0J7KTH4	Phosphomannomutase	2863.05		4234.13			2139.55	1390.87		779.205		3354.65	2390.56	1088.09	4177.8	1148.01	2819.34		2425.01	2091.25	1788.26	9660.34	3419.41	1125.65			4965.4	2152.57	1272.11			2221.01	4575.82			2950.79
A0A0J7KTH5	Threonine--tRNA ligase	2228.31	1020.61	1999.8			2179.92	679.863		675.199	1445.29	1563.55	2931.14	2130.97	1236.76	1769.24	963.694		2494.43	1709.82	1455.22	2730.14	3077.37	1344.69			1333.66	1414.47				3113.09	2208.49			857.317
A0A0J7KTI8	Dipeptidyl peptidase 3 (Fragment)	35753.2	14389.2	77844	48040.4	72226.2	52737.6	34393.9	141058	32741.3	27875.7	51824.9	33948.6	40685.8	45711.1	30836.8	92011.1	76614.7	35531.6	108321	94227	9741.46	50897.9	47724	84317.7	60227.3	43238.9	67746.7	9183.04	6595.64	73360.3	39526.4	45410.9		141820	58236.6	68648.3
A0A0J7KTJ1	Guanylate kinase	1651.18		4275.02		1323.62	1995.28	3309.1		3830.47		2890.37	1680.04	550.935	1820.95				2633.73	1204.75	1723.66		2461.32	478.098	2054.6		860.543	2021.46				868.834	4059.48
A0A0J7KTJ4	39s ribosomal protein mitochondrial	7896.27		23122.9			6046.9	13474.2		12101	241.341	12841.2	3570.75	807.085	6539.1	326.1		2406.83	13546.2	3158.56			6950.44	2115.62			2066.54	6147.58				4572.67	18639.1
A0A0J7KTJ6	Lipid storage droplets surface-binding protein 1	645.24	1592.65				281.842				1284.01		635.898						739.509	686.129									1148.77					2419.11
A0A0J7KTK1	Oxidoreductase glyr1-like protein	2177.47										956.762	1136.9		592.336			1247.45	1235.76									1220.85				705.009				3991.04
A0A0J7KTK4	Putative u5 small nuclear ribonucleoprotein helicase (Fragment)	799.62	2089.88	228.936			580.302	223.815				721.002	716.328		489.446				669.381				1680.53									705.987
A0A0J7KTL0	Small nuclear ribonucleoprotein-associated protein	1928.12		1630.34			1020.56			599.187		1812.54	735.43	839.478	734.427				1010.8									752.978
A0A0J7KTL3	Putative zinc finger protein 729	691.228		1261.34			455.701	854.281		614.428
A0A0J7KTL5	Phosphatidate phosphatase lpin1-like protein	741.679		432.147								910.544	972.032							614.464			446.846	692.399			959.35									1106.06
A0A0J7KTM5	Mitochondrial ornithine transporter 1	4173.89		14361.1			4716.15	9635.92		9140.71		5016.13	4721.74	2703.49	6809.86	2779.33		3464.56	4794.34	3029.44			6177.38			3585.12	3372.15	6157.72					1918.46
A0A0J7KTN5	Cullin-associated nedd8-dissociated protein 1	1541.54		2941.03		3045.23	1842.13	1367.12		2395.56		3490.23	1132.78	1229.38	1685.07		2873.28	1909.38	3122.32	2994.28	2422.02		2169.4	1130.58	2644.75			1740.25				3031.7	4558.83			3305.65
A0A0J7KTP4	Ras-like protein 3 protein	6077.07		7791.26	2143.67	10042.6	5814.48	2386	10530	2273.7	7623.12	1763.83	5806.83	4096.44	5914.97	2613.22	4983.94	9222.63	2778.7	5189.49	6712.47	10242.1	9269.33	4095.42	7926.81	10129.8	9884.67	11099.8	10196.4	8273.17	15064.2	7639.73		5340.91		9355.96	6340.19
A0A0J7KTQ5	Phosphatidylinositol 4-kinase type 2	201406	13455.7	280200	8528.65	7769.96	251756	295514	73633.5	331326	12326.5	228241	145888	160389	222212	132798	20266.4	181078	171264	126873	39565.3	7293.77	182068	78041.3	12367.7	133732	99839.5	254229	7254.76		54758	68367.6	168758	32944.6	234222	88143.2	124204
A0A0J7KTR1	Glycine N-methyltransferase	4195.94		383.07			659.678	397.352			640.648		2246.44	902.197	891.646	982.558			1063.79				2390.56	870.004			2166.72					558.462				1105.01
A0A0J7KTR7	Hydroxymethylglutaryl-CoA lyase, mitochondrial	1626.66					625.611						929.705		1063.05									180.82
A0A0J7KTS3	Atp-binding cassette sub-family a member 3	5503.76		11996.3	23477.3	18108	8700.31	7121.05	19578.5	11060.2		15232.7	4761.5	3489.26	6836.33	5542.69	18802.7	12451.3	5901.93	24690.8	13099.8		8344.45	3719.17	26667.9	11050.4	9431.75	9357.44				10660.8	9393.48			3740.75	9355.58
A0A0J7KTS8	26S proteasome non-ATPase regulatory subunit 6	3923.89	2722.39	6843.41	8382.93	10811	6906.82	5583.69	13234.7	13802.9	941.508	10283.2	2233.14		5204.51	776.863	8461.53	11482.2	5306.33	8508.59	11791.9		5853.71	1173.88	11303.7	3101.97	2764.38	5702.51				4080.79	11249.3			1589.91
A0A0J7KTT3	Protein extra bases-like protein	566.387		1415.28			445.065					217.982	894.736	360.768	659.387				775.012			9309.07		697.285				1028.89								1503.5
A0A0J7KTU0	Trifunctional enzyme subunit mitochondrial-like protein	26552	6789.47	25603.4		1048.81	16355.2	27348.7	6636.86	12613.2	5774.22	15637.3	19152.6	17471.9	19859.5	16979.7	5322.05	10077.5	25330.9	11176.5	3761.39	9922.97	14455.1	10810	1773.3	7909.15	16326.3	28183.1	5289.28		12580	24477.3	14871.6			8551.1	6651.07
A0A0J7KTU2	RNA helicase	1627.93					384.974					1201.87	1636.88		909.438	785.646			1719.75			7850.67	1627.76				666.043					1262.35
A0A0J7KTU4	Methylglutaconyl-mitochondrial-like protein	12221.4	6451.47	19583.6		2602.56	8408.63	11703		10961.2	4269.86	10663.7	9205.46	8171.04	14800.8	5243.91		6879.48	9645.41	8298.92	3088.68	4772.07	8456.48	9464.34		6158.16	9826.91	7748.99	4566.58			7124.77	15251.4			5863.47	8615.96
A0A0J7KTU9	TIP41-like protein	1240.87		777.018	9367.29	11548.5	2159.04	883.834	10027.6	1383.23	498.822	2949.6	853.53	1050.57	1346.72	385.491	13201.1	6309.47		5780.94	13177.4		5701.57	478.945	12159.5	4948.66	3139.41	3959.18	2276.29			1208.69				1321.01
A0A0J7KTV3	V-type proton ATPase subunit G	2292.15	8876.23	3280.66		2351.51	3388.01	2737.65		2530.87	2113.28	4642.51	3306.2	2183.58	3299.93	745.364	3021.44	1205.41	4377.16	1690.73	2705.24		4360.04	1059.02	1948.19	1821.28		2652.13	5138.04	3932.97		1389.53	3813.41	1204.85		5859.38
A0A0J7KTV8	Glucose dehydrogenase	2324.22	26664.9	4066.56	3139.73	2531.28	1249.97	1875.91		1030.67	43559.1	1319.03	495.49	764.657	1289	2605.8		5068.59	2014.67	10099.5	7958.44		1705.69	1617.22	3824.24		8263.61	1894.43	10257.3	7902.59		5059.12		23486.1		2413.22
A0A0J7KTX8	Replication protein A subunit	873.245		2628.89								638.364	630.173		439.854				564.601				1442.71									861.314
A0A0J7KTX9	Serine/threonine-protein phosphatase	9528.34		3600.79	6034.39	4113.29	12624.6	11093.2	16471.8	15219.8	5725.54	5832.94	14685.9	19199.8	18505.4	15654.1	7979.62	15096.1	5756.09	7021.58	9515.56	46916.7	18559.1	15017.8	7076.67	22677.7	16268.6	26935.7	3215.12			4719.45	5748.95			17142.8	10855
A0A0J7KTY9	Integrase_SAM-like_N domain-containing protein	5146.87		13166.1		23631.2	2541.85	2638.12		3787.54		2596.94	2296.3	2006.48	2366.17	2001.27			4425.08				3885.59	1562.88			3715.72	3237.67				4057.29	7917.08
A0A0J7KTZ7	Paramyosin-like protein	458997	24423.2	590953	28277.3	45144.8	442332	561867	158472	566841	19712.5	523854	371382	388515	348136	376408	97346.7	411958	395590	443700	192525	5280.82	356387	176780	46451.5	454768	302269	513104		4922.12	153779	307558	492724	29985.4	1057440	208257	434282
A0A0J7KTZ8	Domon domain-containing protein	1808.59		4152.83			774.341	947.724		739.818	1102.35	1685	421.003		909.075				2483.6				614.126									2080.76	4947.73
A0A0J7KU07	Phosphoserine transaminase	4331.97		17458.9	2077.29	3209.58	5529.53	2230.43	9770.74	1425.02	48098.1	4358.94	7895.11	3634.77	7868.27	2464.76	3814.75	5794.64	5490.86	10106	10842.1	3992.7	5214.29	10623.3	1358		6058.57	2994.53	3565.66	3186.44		5779.76	10954.6			9632.61	3708.54
A0A0J7KU09	Estradiol 17-beta-dehydrogenase 8	2496.66	2057.8	3516.93			1340.75	829.876		391.523	2674.04	1614.03	4934.09	2203.14	4656.19	2691.05			2558.07	1136.03			1094.21	5127.89			2622.67	730.387			5091.71	4158.61	4193.06			8250.16
A0A0J7KU10	Cytochrome c oxidase subunit 6b2						361.277
A0A0J7KU12	CDAN1-interacting nuclease 1	1953.05		2394.4			733.179	1281.44		1286.23		1839.51	2412.68	2940.84	1104.94	3425.16		1042.54	1842.48				1075.44	186.356			2108.95	1811.21				2113.14	3345.05
A0A0J7KU14	Transmembrane protein 231	2464.43		2419.64	9023.38	11622.8	3796.77	2262.14	16000.7	2504.2		4346.18	2690.48	3496.73	3106.77	3607.11	19022	10486.2	2089.67	21571.6	11316.5		11899.1	4111.6	13050.1	14966.2	5507.73	9357.41				2064.88	2110.09			4266.36	13135.7
A0A0J7KU17	Receptor-type tyrosine-protein phosphatase zeta	2037.91	9035.97	699.101	2129.31	3233.32	1233.04	1007.96	5979.13		13207.3	456.172	713.249	1606.43	1334.01	1591.32	5575.09	3117.05	520.257	1897.16	1076.37		2815.23	996.083	2716.34	4618.53		773.102	6815.51	8663.47		2277.36	2384.72			6983.47
A0A0J7KU18	Protein set (Fragment)	850.204		582.835			710.021				2051.02		946.324	628.759	765.568	671.499			312.275				2298.98	1011.84			1730.95									1573.89
A0A0J7KU30	Cullin-associated nedd8-dissociated protein 1	3291.98		3051.24	7970.32	5428.33	3317.81	2068.13	11475.1	5157.58		7136.09	1479.97	5146.82	2710.71	1939.28	9068.19	4651.78	3738.7	7582.58	4701.61		3037.93	4682.9	4716.66	3482.19	5388.55	3671.96			8367.4	4355.04	2647.43			5872.07	6090.83
A0A0J7KU40	Membrane-bound o-acyltransferase domain-containing protein 2			4808.85
A0A0J7KU41	Tctex1 domain-containing protein 1-like protein	4466.08		6353.68			4353.76	4217.8		4142.82		4588.89	3037.02	6588.89	3527.13	5641.79		2989.59	4348.74	3566.56			4545.77	2849.08		3736.9	4365.29	5530.08				1953.61	6137.14			2428.88
A0A0J7KU48	Serine threonine-protein phosphatase 2a 65 kDa regulatory subunit a alpha isoform	22432.5	3476.43	23920.6	11312.3	14344.5	18543.1	22368.8	23700.3	20847.5	2360.26	20258.1	18226.9	19569.3	21720.7	22091.3	14867.9	20255.1	19867.4	26036	13995.3	14585.5	21263.4	15361.3	15299.2	18091.7	21655.5	24434.1	4285.69	1711.83	18795.6	13864.7	11082.2	1013.03		17283.1	15744
A0A0J7KU49	Sugar transporter erd6-like 6 protein					1659.61							1151.26							1173.06	1009.28
A0A0J7KU50	Alpha-methylacyl-racemase	1847.28		4407.42			2155.78	8262.32		1663.8		3092.12	2769.68	3062.24	2222.55	2435.97			2447.47			1645.12	1693.57	1289.97				2739.4
A0A0J7KU58	Phosphopantothenate--cysteine ligase	1459.48		562.045			1401.87	635.159		572.213			3255.16	1253.21	3212.9	1730.18			154.939			4652.66	2765.73			2663.16						5075.17
A0A0J7KU63	Succinyl-ligase	6681.73	10094.3	4958.47	3768.45	2755.93	587.159	2320.78		1252.75	2084.66	1695.11	2799.57	2319.49	1439.49	2135.91		2882.54	1813.44	4301.09		5401.43		2720.17	5127.83	13254.5		2744.37				3479.48				5725.13	9785.53
A0A0J7KU67	Protein rop	3720.34		3692.45		3272.04	2645.01	1865.71		1820.31	3142.52	3857.15	3792.84	3143.68	3931.89	3585.77		2628.52	2863.67	3527.87	5144.02	4854.09	6305.32	1563.29	2944.93	3755.67	4546.22	3185.5	4384.05	2854.6	8498.95	6936.81				2972.14
A0A0J7KU71	Proteoglycan 4-like isoform x2 protein	956.308	3016.68					742.314			14598.8											26535.7							1784.52	4093.39			1436.28
A0A0J7KU73	Mitochondrial chaperone BCS1	1137.21		3455.53			1034.07	2414.53		2016.36		2646.3	1357.17		719.082			1508.85	1738.31									1814.96				1668.79	5693.3
A0A0J7KU77	Protein lifeguard 1-like protein	47161.6		82436.1	283666	422895	74286.5	48571.3	479403	39933		133170	47282.2	77833	53349.8	51494.2	477387	215876	31359.3	377569	341713	2702.19	79008.4	115746	365567	181538	137540	92405.4			129565	74606.1	31325.4		173030	141468	264695
A0A0J7KU79	Protein archease-like protein	1698.88					1295.42	405.258		494.564	2339.77	804.992	1170.54	1455.43	741.214	1112.75		698.092	1187.19		1375.59		1223.52		1115.1		1055.83	891.978				1412.1	752.546
A0A0J7KU84	Rna-binding protein fusilli	363.335		315.095			161.586					500.538	402.753	278.657	179.709				251.314			1619.53	268.438
A0A0J7KU89	Cullin-4b-like protein	441.929											172.072	461.615					258.874			1141.11	499.454
A0A0J7KU93	Filamin-a-like isoform x1 protein	672.866		867.329			501.467	292.113				559.538	402.375		687.859	618.212	1096.02	556.492	690.537								949.5	356.963				1181.61
A0A0J7KUB7	Dynein heavy chain axonemal (Fragment)	36596.7		68915.2	1247.43		35397.8	38777.3	21180.4	45097.4	8733.45	45388.4	25886.1	30965.6	27585.6	28730.5	3978.36	25590.1	41579.8	26265.1	6376.1		33028.4	19482	15160	34115.8	26537.9	41782.1			14541.9	31318.1	67332.4	15283.4	53357.4	20913.3	46754.3
A0A0J7KUE2	Vesicle-fusing ATPase	3821.42		3004.06	13456.4	15482.5	4906.99	3024.72	13551.9	2622.57		4320.13	3347.77	5316.55	4239.5	3860.19	15111.2	9394	2019.66	10929.5	16415.8		7454.51	1859.15	18109.5	13125.2	3559.14	7931.67	828.703			5129.87	2663.7			6905.95	9472.23
A0A0J7KUF8	Talin-1-like protein (Fragment)	936.022	2045.63	1242.44			753.242	378.79	43620.4		37542.1	1206.42	1283.75	802.778	626.622	832.171		1559.38	1356.11	924.283	983.623	4924.44	1047.11	438.748			1184.45	1277.42	3655.74			1101.73	1424.63			1125.56
A0A0J7KUG2	Phosphoprotein	2525.34		1935.22			746.336	1452.65		2055.49		2164.86	2318.4	2984.86	1842.29	4456.39								2425.25			1562.13					2314.34				4025.7
A0A0J7KUI4	Tubulin-folding cofactor b-like protein	3056.53		3815.44	4082.86	4808.3	3452.25	2252.62	7684.73	3454.53		5498.36	4152.53	2551.35	2036.18	3178.74	9572.65	4550.28	3268.06	7456.35	10844.8	6420.74	3433.34	1311.81	9578.67	5000.38	2679.96	2819.43				7070.91	4187.7			1626.1
A0A0J7KUK6	Signal recognition particle subunit SRP68	1316.26		1674.63			1121.38	448.904			1707.7	1295.31	1670.98	864.987	1051.97	672.292		1437.08	1157.02	2247.74	2277.13	2897.88	2710.35	710.913			776.824	1149.76				811.455				772.944
A0A0J7KUL2	Long-chain-fatty-acid--CoA ligase	967.657		912.623			994.534	1077.17		616.421		1744.45	2031.58		1658.19			1239.16	801.726				2105.51	1001.86				1043.79
A0A0J7KUL3	Uncharacterized protein C16orf48	818.237		1965.49				642.06		493.073		1266.7	465.605	592.196	512.898	638.372			1659.3									525.739				1377.2
A0A0J7KUL4	Early endosome antigen 1-like isoform x1 protein	12447.1		15152.6			12199.3	11475		16672.7		15808.7	10735.7	4179.27	13620	7803.19		11180.6	9187.28	14368.8			24192.2	11491.5		8080.52	9172.12	13687.9				13644.2	12985		52575.3	6090.46	8099.18
A0A0J7KUL6	C2H2-type domain-containing protein	33517.2		32535.3	9462.94	7275.55	41363.3	53802.2	18732.8	52429.4	2053.07	26087.3	35573.8	31459.9	37815	36091.4	8699.56	24251.4	27982.3	23327.3	27624.9		34925.6	20363.3	9034.63	18632.1	36185.2	75177.6			14893.3	19183.3	31159.5		29522	21086.1	10888.6
A0A0J7KUL7	2-hydroxyacyl-lyase 1-like protein	2133.6		5044.06			2728.29	1762.21			1683.14	2363.78	1547.12		1885.22				2522.3		2756.9											2676.69	4313.73
A0A0J7KUM0	Stress response protein nst1-like protein	120642		43366.7	6308.68	6568.07	87325	92403.7	35647.7	124724		128690	104017	94011.1	118249	83436.9	19323.2	83986.2	112435	87628.2	21118.7		93936.8	106778	8439.69	89417.4	61332.4	149275			40310.5	75810.7	119031			200154	73967.1
A0A0J7KUM6	Vitellogenin	11995.9	9772.95	48118.3	6389.92	3755.17	75072.3	2586.45	41762.8	3195.12	18018.6	7603.94	77599.3	30094.1	52287.9	4957.38	9070.59	18254.5	87847.5	36381.2	60267.1	15581.9	1934.36	23384.2	9224.7	7396.98		19708.5	8415.11			46694.9	39730.1	2372.05	414898	28493.7	4735.34
A0A0J7KUN5	Shootin-1	741.299					1676.95	458.323		550.579	1267.92	937.321	2082.78	788.492	1547.3	1548.1			406.789		1245.45		4398.51	1247.77		1325.43	1546.56	2271.95	3468.96		4166.79	802.606				5036.02
A0A0J7KUP9	SH2 domain-containing protein (Fragment)		6225.2		3239.61	5722.16		294.135		538.465	4092.22		246.748	1457.84	293.171		2570.81	3180.91		4495.78	2717.82	1787.8	742.068	6307.45	6938.25	6019.01		2006.01	3666.22					11514.7		6789.27	8047.13
A0A0J7KUQ4	Chromodomain y-like protein	3229.93		1386.32			1148.94	497.486				4042.89	3047.08	2158.22	1588.94	1410.93			2030.96				3341.98	629.365		1900.46	3407.19	1976.49				2053.29				2803.69
A0A0J7KUR0	Cytosolic Fe-S cluster assembly factor NUBP2 homolog			774.19				55.8771				173.059
A0A0J7KUR2	Mitochondrial import inner membrane translocase subunit tim14	2219.68		5040.77			2306.96	4222.44		4017.09		2270.73	2567.33	2690.45	1941.55	5765.67		1910.23	1973.64	3193.86			5895.59	473.064		6267.08	2937.42	5014.18				2420.65	8298.4				3000.77
A0A0J7KUS4	Dynein heavy chain axonemal-like protein	223631	44496.2	320765	11031.2	10416.1	202549	248226	89008.8	253962	11676.1	252338	157206	178296	208844	161660	26515.4	170927	191629	149211	32144.1		205739	107065	16373.3	191990	150408	225462	64324.3		63547.1	137314	271143	6661.94	350957	106129	185831
A0A0J7KUT5	Prostaglandin E synthase 2			3295.88				515.029		226.856																							492.176
A0A0J7KUU2	Pentatricopeptide repeat-containing protein	1635.1		375.775		3441.64	1182.1	548.295	8024.81	827.658		416.992	967.709	1850.33	904.906	2923.36	4394.86	4873.45	237.962	3643.9	4844.38		1769.5			1725.6	3933.42	2288.01								2576.57
A0A0J7KUU9	N-beta-n-acetylglucosaminyl-l-asparaginase	1878.63	15070.4	4751.28	3448.18	5539.4	11029	2356.42	9977.34	3386.25	105397	3138.76	3801.58	2268.32	3526.57	4654.06	3682	7660.33	5191.55	9278.73	12417	12041.4		2739.11	4562.71	3594.48	4211.73	4561.34	23589.7	53661.6		998.831		6388.08		3822.66	2030.89
A0A0J7KUV9	Septin-1 isoform x1	1981.04					1217.39	393.751		725.366		1587.79	1311.16	1054.1	1401.77	1762.87			909.575				3134.82	375.794			794.91	1319.36				1943.63
A0A0J7KUW2	Dynein beta ciliary	131936	7048.33	249077	4135.08	3291.2	108710	154274	35379.5	168480	4634.23	146703	94824.6	106608	120181	100988	9845.33	83255.5	128356	70213.6	11128.7		111327	47422.1	4433.8	75204	85500.3	120574			41801.3	96617.7	108155	12695.2	227508	28863.9	77448.6
A0A0J7KUW3	Troponin c	536.232
A0A0J7KUW7	Leucine-rich repeat-containing protein	9855.81		18754.3	1342.39		9158.44	12841.8		11278.7		12619.2	11638.6	16942.2	11235.2	16288	1688.98	11512.4	10252	15101.6	3792.93		14199.2	7137.19	4302.72	12415.7	8010.7	12857.8				12042.2	15643.3		20331.3	9440.42	14077.6
A0A0J7KUX9	Proline dehydrogenase	31465.3		38619.8			30047.7	40921.6	16385.9	34260.3	5174.98	40909.3	20030	24492.9	36609	26970.6		20678.8	32323.3	14816.3	7500.44		22302.8	21490.4		26012.6	28647.1	33486				22597.8	29539.6			20811.5	15578.7
A0A0J7KUY0	Bifunctional purine biosynthesis protein ATIC	10985.1		15835.2		1535.1	11275.3	8782.54	7156.86	3551.43	715.787	8951.71	15531.6	9813.42	12143	16821.2	6100.44	8386.01	12261.1	5310.71	6772.66		12164.6	27642.9	3068.64	10570	16005.5	8856.69	5228.46		15652.9	11882.8	10134.4	2726.91		18379.1	12616
A0A0J7KUY1	Extracellular sulfatase sulf-1-like protein (Fragment)	1374.03		2509.99			1439.9	1771.08		1698.19		1474.77	818.114		1447.89				1066.3	868.63			955.481				3013.82	1694.95					618.23
A0A0J7KUY6	Ice nucleation protein	726.713	27135.8	715.538	975.025	2286	2347.27	2000.72		1526.3	216352	1233.22	1868.75	585.73	2690.91		9366.24	970.353		5735.27	5768.32	3175.68	2055.55	192.135	7336.96	3060.12		2010.97	55178.4	138370				10255.4
A0A0J7KUZ2	Ras-related protein rab-32	5353.1			10792.4	7780.62	1996.93				4981.64	3700.65	3310.48			5620.33			3318	6224.62	8092.51		2073.19				5641.99	2665.95				4956.29	5800.5
A0A0J7KUZ7	Peptidoglycan-recognition protein lb-like protein	878.268		685.832			3832.06	455.886					294.803			1016.06			242.911					640.028								1617.87
A0A0J7KUZ8	Acetyltransferase component of pyruvate dehydrogenase complex	1045510	13299.7	354489	19474.4	42088.9	709636	469267	302367	701537	9512.87	890285	838092	813737	851075	766005	114081	1005120	627046	685952	245351	19944.2	886631	859130	43318.5	965652	850197	1235030	7201.24		375438	674758	1175650	46614.3	690715	701128	708561
A0A0J7KV04	Nucleoside diphosphate kinase 6	30352.9		16410.4			15459.5	32101.4	2784.93	23419.2	341.167	24495.4	12924.7	14313.6	11913	12257.9	1977.05	9697.77	20170.8	7133.05	3607.82		9765.51	1768.67		12039.8	7268.67	15501.2				31176.9	38655.4		93412	1544.07	4638
A0A0J7KV08	Protein disulfide-isomerase	3113.48	2725.26	3089.5		3094.15	3926.11	1344.84	3967.64	2949.51	3999.97	2581.93	8733.84	2863.71	6776.7	2524.33	4302.17	7476.38	7008.86	3867.26	4149.88		5514.67	6954.56	3630.16	3939.62	2472.62	4039.15				7299.49	7965.88			6693.63
A0A0J7KV14	Uncharacterized protein	1774.23					753.917	1017.85		1514.57		962.617	1296.9	1418.12	1424.06	3382.24		1554.05		4322.58			4190.64		18792.8		2262.48
A0A0J7KV23	Inosine triphosphate pyrophosphatase	825.675		6003.58	1134.27		1428.14	1077.42		922.689		2923.68		765.686	685.253	842.921		1321	3831.81		1032.35				1458.18			1704.73				1084.41	6210.26			1050.05
A0A0J7KV25	Superoxide dismutase (Fragment)	928.058		602.075			1083.74	319.341			2084.73	1750.03	160.812		668.79				1694.68								413.249						6472.37			896.7
A0A0J7KV26	Protein yme1-like protein	633.363		500.253				288.564		376.567			724.353			384.235			251.282													501.297
A0A0J7KV28	ATP synthase subunit b	14854.8	2894.82	13858		528.689	15962.4	16574.6	11026.3	15282	2672.25	15690.6	20024.6	19645.8	19839.8	15522.9	2752.72	18703.1	12257.1	16844.9	5356.79	6355.96	19416.5	13308.4	2003.17	21606.7	19407.1	27509.4	3442.67		15277.5	11205.4	19687.2		78672.1	10661.1	24781.1
A0A0J7KV31	Protein BCCIP homolog	1305.75					1837.56	1420.84		345.946			1801.94	3718.36	1532.73	1225.6		1155.33	376.572	2573.09		1525	969.722	6766.3			5038.22	2257.2				1030.81	539.446			6444.45
A0A0J7KV35	Dynein light chain	31153.8		88185.9	1911.95	8984.26	70610.1	104190	23924.8	106606	8582.58	121426	18896.9	10689.1	63076.5	7678.9	27123.2	28286.7	97469.8	25923.3	15974.3	11828.2	42296.6	18434.2	8762.82	26376.1	32390.7	47584.9			23669	17605.6	229845	5355.64		56008.3	8946.54
A0A0J7KV47	Uncharacterized protein	111237	5877.34	108639	2411.85	4724.74	74151.1	102535	24995.3	110561	1652.83	85447.2	101546	92973.6	75396.8	94855.9	11127.5	74694.8	85413.6	49991.5	18411.7		72528.9	76418.8	4608.43	58263.8	70438.9	74281.9			31908.5	65643.9	27055.9			147752	91742.3
A0A0J7KV48	Deoxyribonuclease tatdn1	4440.91		4689.28	4230.42	4780.56	5286.88	6240.15	12975.5	4510.13	1721.52	7243.44	2944.24	3403.59	4503.16	2324.04	6761.96	6427.63	2123.83	5359.03	13173.8		4851.46	5582.67	5488.17	6630.88	5427.1	6872.86			5863.97	3770.55	3210.86			5854.19
A0A0J7KV50	DNA topoisomerase 2					8938.6	1472.38	1198.68		242.098	15056.2		657.348		1223.96							8616.45					235.538	519.758
A0A0J7KV53	Acyl--binding protein	2913.3		11256.9			11432.4	2054.14		1418.03	5027.45	2284.42	558.669		3728.35			1367.27	6622.32	6180.83	7654.14		1826.94	5048.68	5703.59			333.287					4756.75
A0A0J7KV60	Elongation factor 2	65695.5	46734.9	43405.9	24439.8	22916.4	41002.5	16936	58175.2	13110.1	48258.7	41558.8	82729.3	45218.2	54488	35858.4	44947.6	46633.4	35675.7	51901.7	40715.3	99531.8	48176.4	51041.6	26119	65051.9	63261.3	37693.2	39510.4	33532	42747	44679.6	19288.7	18863.1		51940.4	45334.2
A0A0J7KV73	ATP synthase subunit alpha	284.018	3661.27	440.054	1121.43	978.825	264.249	134.944		357.015	1476.03			646.713				1574.47		2280.91			1006.53		2196.85	2577.89		904.895	1363.62	1051.67			555.203	2185.71
A0A0J7KV83	Ferritin	25985.5	4279.72	26888.4			44271.8	11711.7	6798.97	4736.93	47929.7	31110.9	13752	16249.7	33062.4	14554.9		7390.34	49063.6	9862.09	5233.99	4325.93	14349.2	51783.9	2500.79	4522.23	5951.88	13488.4	3724.12		14098.9	27778.7	21633.9	1574.62		27847.8
A0A0J7KV88	Failed axon connections isoformx1 (Fragment)	2107.51	3967.03	903.56	7185.33	7310.38	2676.35	599.495	2937.98	1004.94	14478.7	2900.95	2404.88	5485.64	3886.19	1544.1	8498.93	3819.88	1006.18	4856.65	3781.8		3936.75	905.993	5498.94	3786	3130.73	4447.77	9568.49	8099.57		3632.28		941.417		4438.44	6847.69
A0A0J7KV90	Importin-5	3988.08		6110.28	3003.21	5335.3	2617.56	1662.98	12072	4297.81		4486.85	1572.62	1785.5	1574.66	2131.06	4367.27	5749.17	1996.07	2154.1	2650.2	4297.55	2305.12	2813.97	3500.07	4733.53	4325.1	1761.68	1110.47			6078.67	3895.38				3415.43
A0A0J7KV95	Rna-binding protein squid	226.677		471.628								539.348	410.77		568.957				734.509					580.663				409.134
A0A0J7KVA0	D-aspartate oxidase-like protein	1492.21		448.96			158.529						670.642		403.795				399.475													1410.33
A0A0J7KVA1	Zinc carboxypeptidase a 1						1901.06				5044.95										285.959								4468.34
A0A0J7KVA4	Sulfhydryl oxidase						573.867	225.616			893.279		659.916		527.051	130.653					574.149		1451.41					242.968
A0A0J7KVA6	Eukaryotic translation initiation factor 2A	1228.34		1186.82			797.362	376.188			1058.57	1070.05	1116.72	450.182	709.751	726.456		491.96	875.708	1474.93			1178.08	196.829				472.514	785.947			2044.41
A0A0J7KVB1	Slit 2-like protein	3939.65	3600.92	8542.49			7820.2	3750.12	10389.1	2102.15	15080.3	1921.82	8433.3	4475.59	8634.59	5434.94		2388.34	5825.26	5840.34	4594.83	15193	2763.03	6224.46			4059.23	5486.79				29653	16017.2	11012.8		4662.06	4507.78
A0A0J7KVB3	2-oxoglutarate dehydrogenase e1 mitochondrial	403694	34774.5	1665320	18628.3	22626.3	528272	1173860	192550	753788	26110.6	812021	241418	225609	316500	158768	72561.7	357921	999577	216422	107986	30340.2	227299	234546	29262	275499	152583	649593	6157.27	9367.13	210432	200802	1206170	304153	459167	48340.5	94181.7
A0A0J7KVB7	Thioredoxin-related transmembrane protein 2-like protein			788.73						207.871									166.015
A0A0J7KVC1	Tubulin alpha chain	4546.36		20699.9	4945.58	9894.43	4920.29	4151.31	12156	5274.6		5683.71	2890.06	5256.45	5943.83	2136.66	16138.7	13550	3028.64	7452.8	15011		3298.83	3491.72	7056.55	10079.6		7879.51				1693.77	3183.81			3577.48
A0A0J7KVE5	Glyoxylate reductase hydroxypyruvate reductase	29842.5	4559.43	115182	39686.3	29943.2	54412.2	91430.7	50407.8	41628	22280.7	66992.1	21119.3	15047.1	42904.7	13959.6	25661.5	60446.6	41328.6	42384.5	56552.3	4164.72	26003.7	26449.8	42624.1	42725.7	37658.5	51920.6	5235.5	3273.9	32822.2	45696.8	29106.4		93103	21134.8	32302.5
A0A0J7KVE7	Transportin-1	8908.45		33243.5	11088.9	12618.9	10439.4	8756.11	17533.3	16091.6		18540.9	16725.1	12769.6	27970.4	15509.2	19704.4	23258.5	15069.2	20076.4	7034.98	4249.46	16742.7	16750.6	14419.7	17232.3	35183.7	18010.2				8646.29	6872.45			20407.7
A0A0J7KVF0	Hemolymph lipopolysaccharide-binding protein	469.355									3173.27		2009.83						582.8	2078.08	1531.7	4157.49							1121.21			3003.71
A0A0J7KVF5	Mitochondrial fission process protein 1			6336.5				198.069						529.419	346.084				1033.33				498.751										1504.04
A0A0J7KVG2	Venus kinase receptor												1058.66											1650.38
A0A0J7KVG9	Protein hu-li tai shao	5048.17		3295.49			3264.14	580.888		751.884	1608.7	11040.4	5249.11	1375.31	2923.19	2521.68		3120.43	5725.68	3414.6		4961.5	2124.04			4634.23	4572.77	3191.61	4673.42	3277.28		5148.66	3126.87	617.848		2746.88
A0A0J7KVH2;A0A0J7KZ12	Tubulin alpha chain	211289	9541.62	697663	2969.66	2070.11	124087	130978	39893.5	160623	5462.2	139985	52854.4	27840.1	44799.9	25067.2	6659.51	37292.2	214425	21286.6	2638.08	9185.96	29036.6	29315.9		39088.1	98355	75019.5				179941	279216	18880.9	110275	8283.01	14203.9
A0A0J7KVH3	Regulatory protein zeste	5490.97	15590.4	2180.14	1207.36	5257.83	5469.25	1526.87		825.705	22907.7		4626.4	5129.29	5095.63	1226.81		7535.99	3348.66	18417.9	13406.5		4046.1	2100.44	2542	6777.91	3026.96	7548.75	14499.5	5133.41				7129.68		16239.3	3233.1
A0A0J7KVH5	Adipocyte plasma membrane-associated protein	972.01		211.217			1440.63					439.546	216.836		1745.73			803.803	2163.59	4126.79	451.764			228.506	1179.19
A0A0J7KVI4	Glucosamine--fructose-6-phosphate aminotransferase (Fragment)																		265.834
A0A0J7KVJ8	Vitellogenin	282004	361927	1915630	83011.4	98872.1	1919390	260813	4212290	303072	626846	420674	2631720	1068970	3568720	300480	269526	773787	2003290	2146130	1313100	135780	877142	2054490	277958	584078	153127	1805500	569839	92100.5	1901030	1306670	1352170	180980	1664170	635463	508485
A0A0J7KVJ9	Reticulocyte-binding protein 2-like protein a protein	1244.94		1794.84			1045.48				2090.26		1715.14	1332.02	1263.51			2042.34	2374.81	2110.54	2471.49		2085.26					1638.5	2900.05			3254.63				1745.64
A0A0J7KVK5	6-phosphofructo-2-kinase fructose--bisphosphatase isoform x2	2688.45		3947.66			2133.82	816.862		907.214	1300.73	2814.33	4942.7	2168.31	3251.38			979.708	3624.44	2107.49	1334.36	8508.5	1334.51	1476.27				569.876	1407.31			3560.52	3308.87			4071.07
A0A0J7KVK9	Adenylate kinase isoenzyme mitochondrial	7715.86		6508.8	5461.08	4551.21	5304.34	6651.61		5588.39	1760	4973.51	8340.8	5959.82	7670.86	8088.68		2624.83	5218.12	4307.88	6708.39		4816.24	3120.63	17405.4	5491.82	4348.47	5709.2	1748.84		2908.44	3776.2	5151.86			5337.13	2823.91
A0A0J7KVM3	Dolichyl-diphosphooligosaccharide--protein glycosyltransferase subunit 1	4766.57		2445.83		1732.87	2871.18	1042.71		1907.06	3897.48	2409.84	5608.51	2831.72	4414.1	3685.43			3124.7	4973.45	2080.22	15049.1	4743.29	3173.68			5516.91	4098.62	4105.25	1622.56		5946.6				747.308
A0A0J7KVM5	Spectrin beta brain 4-like protein	1785.96		2537.72		1310.47	1484.4	828.09	6501.59	650.203		2068.08	3155.67	2806.61	1790.96	1348.42		2714.17	2364.06	4096.01	2358.1		3048.59	1561.95		3420.2	2446.38	1862.51				1740.19	2459.68			4554.21
A0A0J7KVN7	N-acetyltransferase domain-containing protein (Fragment)	301.23		1564.5			1566.47	208.21				3390.3			687.354				274.173									2033.12					1537.76
A0A0J7KVP0	Putative alpha-ketoglutarate-dependent hypophosphite dioxygenase	55197.9	15322.1	90955.1	5924.15	6802.75	94825.4	12430.1	56549.9	4365.44	12032.6	25595.6	126107	46564.2	109621	21525.8	22044.4	33219.9	84114.3	36936	52249.8	12930	38443	73532.4	16147.7	22584.9	26214.1	19844.2	14268.5	4334.33	90524.9	62684.9	33686.6			64774.1	17238.5
A0A0J7KVP1	Niemann-pick c1 protein (Fragment)										3056.03																		3172.36	1510.72
A0A0J7KVP2	Glycine--tRNA ligase	4045.82		4625.1			3308.94	1347.43	5423.09	1461.79	3348.46	1909.72	4294	4382.26	4421.1	2348.49	3633.63	2814.48	3463.29	4649.93	3350.54	6952.69	2913.99	6652.19	1701.54	6528.67	4640.14	2938.13	2903.27			3071.37	2769.41			7019.98	3960.73
A0A0J7KVQ0	Small nuclear ribonucleoprotein Sm D1			966.994															310.784
A0A0J7KVR2	Pyrazinamidase nicotinamidase	25705.9		80982.9	48827.1	49308.9	46516.3	41087.2	57771.9	33725.4	39615.1	62695.3	25464.5	35943.7	20059.8	31028.9	32674.5	65345.1	27409	42004.6	67525.3		29169.1	36929.1	72713	43752.8	60512.4	57670			63284.5	43495.1	57267.7		23763.5	71736.7	56054
A0A0J7KVR3	Heat shock 70 kDa protein cognate 5	7643.33	6162.67	7008.48		1254.53	3436.47	4246.8		3647.5	4839.96	4169.91	4027.58	2331.28	3645.66	3367.82	2575.26	4293.13	5515.91	3867.48	1108.59	2526.42	3857.39	2240.78	3140.1	6886.96	2733.27	4265.83	2559.07			4170.2	8618.7			3211.22	2836.61
A0A0J7KVR4	Nadph:quinone oxidoreductase	110993		64078.9	3474.42	6025.59	192546	151842	49304.3	103983		86915.5	81602.3	112629	140177	40327.5	15699.3	165110	56753.3	108844	49053.6		123656	107393	5187.18	147929	4206.86	375555				23594	132409			75873.5	26804.7
A0A0J7KVR6	Elongation of very long chain fatty acids protein				39513.3	70436			51957.2								6315.99				4035.83	13359.5		21721.8	11744.1	271356	2299.77		55500.7	126702	39115			36021.2		12972.6
A0A0J7KVR7	Protein bicaudal d	571.074					382.437			599.004			543.49		558.521				314.528				771.704									859.582
A0A0J7KVS7	Uridine 5'-monophosphate synthase	1015.4		3417.53			1369.97	732.749				1283.68	1709.02	1008.57	1254.65			2226.17	2226.5				1968.05	1910.09				1753.87				1815.52	2884.25			2606.05
A0A0J7KVT5	Small glutamine-rich tetratricopeptide repeat-containing protein alpha	26878.1		53100	10354.4	18171.1	31774.8	35380.2	9610.75	22875.8	3164.68	21715.4	27482.5	28007.6	20234	21936.2	11090.8	14746.4	22088.7	17253.1	16076.4	6457.86	27330.6	5843.75	12504.4	17533.3	7013.11	22157.9	3190.34			40976.3	60350.6			6483.79	10318
A0A0J7KVT8;A0A0J7L9X8	40s ribosomal protein s19a	5703.15	6024.28	4313.85	826.221	2313.12	6751.23	2065.49		1582.45	4117.34	2882.94	11437.6	3173.59	9435.59	2787.89	4584.8	5341.05	4281.07	5378.69	6360.66	5619.45	7463.14	5762.72	1841.59	6582.09	5049.16	5275.25	3900.7	2504	10444.4	4871.87	9512.2			5214.85	4988.87
A0A0J7KVT9	NAD(+) kinase	1508.5		2440.12			987.831	2118.5		1407.24		803.452	1211.54	781.029	956.143	2267.97		3066.17	1524.71				1467.55	647.839				1166.51					4842.48
A0A0J7KVU2	Dynein beta ciliary	104487	8382.3	154151	4489.43	4607.38	88520.4	101703	40497.2	121817	10290.1	123174	69082.4	81744.2	92812.2	82864.6	12110.5	72340	111727	67278.2	13166.5		93902.6	57778.7	6418.94	77606.8	86497.4	103812			32768.2	69188.6	120307	10926.3	409105	49308.1	91613.1
A0A0J7KVU6	Sestrin-like protein	670.853		718.057			512.741	173.641		179.026			1360.67	553.755	353.161				590.229				863.465	215.617					1195.11			1078.26
A0A0J7KVV7	PBPb domain-containing protein	1142.05		1794.65			459.628					1123.88	927.249		431.063				1590.84													270.594	1026.07
A0A0J7KVW0	Mitochondrial inner membrane protein cox18			956.848			842.508	434.712			18515.2		1751.15	989.473	1228.25			934.118			1682.89		1253.09	2630.22					5123			1782.39				3210.86
A0A0J7KVW5	Protein-l-isoaspartate-d-aspartate-o-methyltransferase			480.083			530.966	621.457							522.569
A0A0J7KVX1	Phospholipid-transporting ATPase	2003.31		1794.29			815.862	1235.7		1251.42	2448.57	2947			622.437				708.939						1686.09			1672.36	2354.01
A0A0J7KVX6	Cartilage oligomeric matrix protein	7122.24		9148.34	28088.9	20138.7	665.664	1762.86		2404.14			1026.19		2278.14	1905.5			3904.21	6053.02	1966.06	3765.46										15909.9	3649.27
A0A0J7KVX7	V-type proton ATPase subunit a	9689.01		4040.43	4385.87	11234.3	6310.9	8839.82	7963.09	9224.55	30597.7	25149.9	3210.78	5243.1	6687.93	7436.04	8195.17	1522.1	16194.2	6055.65	2333.29		12057.4	2934.22	11254.6	6281.58	15278.8	14525.7	39266.4	51272		43179.3	4093.92	33710			3444.05
A0A0J7KVX9	Myosin heavy chain 95f			774.826			718.032	638.522		411.259	1101.85		513.276		508.04	502.334			610.048				1220.51				1353.99		1612.45			625.776	1125.22
A0A0J7KVY2	Partner of Y14 and mago	608.17		340.461			673.743				4796.28		1091.13		1035.78				2154.1	3224.65	2099.73		1723.36	292.663		1904.99		1347.65	7544.63	6309.03						1127.4	4309.01
A0A0J7KVZ1	Maguk p55 subfamily member 6-like protein	1264.03		2735.67			9711.47	3299.19				5227.97	3482.93		2090.39	696.107		2116.17	3173.75				1063.59			1558.12	6022.14						9702.42			14472.4
A0A0J7KVZ2	E3 ubiquitin-protein ligase rnf123	45158.9	1655.12	45715.1	129658	134144	54139.3	33351.9	85480.5	54173.5	1572.96	77600.2	27141.5	40734.7	30822.4	23826.9	97046	80207.9	34368.5	108872	71828.7		28044.3	18473	191894	61133.4	50002.5	59167.4			16832.3	52971	58841.9	2941.74		16406.2	40858.2
A0A0J7KVZ6	MICOS complex subunit	23368.9		25243.9	2047.01	1268.97	18140.8	29872.2	6601.91	25791.6		20369.8	22244.8	31595.4	22960.8	47444.1	3291.95	15771.4	16853.8	16185.8	11423.4		15371.2	38418.3	2933.7	22109.2	9593	18092.7				11151.5	15356.9			73016.3	12407.4
A0A0J7KVZ7	Ubiquinone biosynthesis O-methyltransferase, mitochondrial	9959.42		13408.6			3961.83	9124.22		7783.05		5112.62	6194.96	5939.61	5267.66	7171.6		2962.34	8575.37	2164.27			5415.75	1574.55	2107.55	4804.44	2633.2	4666.06				10026.5	20610.5			14832.5	2785
A0A0J7KW01	A disintegrin and metalloproteinase with thrombospondin motifs 7	2705.68		3715.06			2562.89	2562.17		3565.68		3000.75	2691.61	1823.37	1501.03	395.819	4510.27	3373.08	3058.47	6061.8	2312.37		3185.09	3967.54		4382.7	5722.58	3589.92				6602.94	10737.2			2725.49
A0A0J7KW07	Syntaxin-12-like isoform x1 protein	3167.69		2730.72	2455.42	5787.04	2332.56	2356.77	10719.3	2421.34	7516.78	4544.52	2777.24	2578.54	2720.15	2964.75	4623.94	4806.93	3190.02	4138.63	6204.69		2897.71	1398.35	5070.6	4575.31	4000.02	2639.51	8237.07	7895.18		3884.36	4139.37	6377.85		2762.01	12857
A0A0J7KW25	Rab gtpase-binding effector protein 1-like protein	1752.62		1577.13	4019.82	3964.4	1753.27	1182.48		1612.91		2821.56	1830.16	2860.92	1397.29	2295.12	6077.42	3115.62	2226.53	5622.51	6714.67		2562.68	839.832	5114.86	6178.99	1787.28	2567.23				4706.83	5344.86			1709.82
A0A0J7KW32	Fk506-binding protein 5		6182.9					422.084			10216.6	1042.03								2206.98	1247.98	29517.4	1517.84						10170.3	2899.55				8815.67
A0A0J7KW37	Large proline-rich protein bat3 (Fragment)	673.025		893.014	2462.27	4405.12	1093.01	616.17		983.1	796.104	1107.88	688.28	635.488	940.07	448.986	1906.7	2319.03	773.2	1451.88	2638.55	830.748	1014.26	1660.93				1409.23				780.356				3472.21
A0A0J7KW46	Ubiquitin-fold modifier-conjugating enzyme 1	2876.95		10376.4			4016.32	1392.27	1955.34	1270.41		2550.14	4342.16	1840.16	6875.06	1089.89		2045.6	6094.88				3756.24	2320.62			1655.99	2161.45				5494.31	4801.42
A0A0J7KW54	Lactase-phlorizin hydrolase						1630.17				1959.45				569.6							5334.83
A0A0J7KW61	Charged multivesicular body protein 4b-like protein	4719.36	2665.63	3780.3	7370.7	9481.4	6307.11	2082.89	12577	2945.39	8426.72	3291.29	4475.75	4617.22	3006.94	4022.9	14635.9	3350.5	1766.77	14355.2	20874.1		5147.86	6466.1	8863.36	5727.96	6916.16	6738.63	8585.33	11231.1	9831.04	3680.19		2839.46		10950.3	7896.5
A0A0J7KW69	Tumor suppressor p53-binding protein 1			1234.98			1838.69			2225.61	849.801			2460.34	2584.12	2263.35								5388.82			1083.33		919.172	1133.14
A0A0J7KW73	Egf-like domain-containing protein			2160.76			1312.66	1026.94			18862.7	3654.89	2127.87		939.03	1892.55			3916.71			8225.59	2857.23	3881.59					2811.65
A0A0J7KW77	Beta-hexosaminidase subunit beta	204547	11772.1	168539	7014.02	6127.58	171476	181420	58551.9	203816	5233.65	182989	142291	131660	139259	95735.6	24216.1	113621	106790	161715	32965.4	175318	120587	61617.5	12032.3	132308	95206.2	123696			54325.5	77791.5	117644		168935	97184.1	173747
A0A0J7KW94	Titin		7076.74		2327.31						8675.42	1445.62													4610.18				11445.1								7094.39
A0A0J7KW98	Lactoylglutathione lyase	8789.05		8345.25	7163.6	5154.07	21314	15568.6	11395	9936.45	40177.9	9172.6	12523.6	9736.46	14881.9	4732.54	7462.45	7999.27	14101.8	9586.07	11219.7		10075	12541.2	7836.87	7576	5803.25	13334.2	2455.67		17833.3	3764.17	4970.88			4667.98	11334.3
A0A0J7KWB3	Mosc domain-containing protein mitochondrial	538.137		1264.72			272.99			157.619			551.865						338.397														1119.84
A0A0J7KWB7	40S ribosomal protein S6	24706.2	5856.98	13377	2034.15	861.509	20517.4	5422.63	13993.9	5298.1	6660.24	16608.4	31029.5	13477.8	24905.8	7991.04		11646.2	31485.9	14826.3	5164.09	9588.32	26061.5	8908.22	2156.31	9785.04	8893.33	10804.3	5046.45			25135.2	9832.8	2991.26	24784.3	5566.89	11219.9
A0A0J7KWC6	Ras-like gtp-binding protein rho1 isoform x2 protein	3256.1	1872.73	7373.5		3194.09	6834.33	2638.19		5288.98	5381.1	7185.14	2468.16		4270.02	601.868	2810.16	2601.07	11428.4	2833.88	2448.61	1486.98	4139.72	670.982		10486.3		2771.16	5060.26	9362.38			10634.5	1139.98		3085.91
A0A0J7KWC9	Low-density lipoprotein receptor	902.69		5071.96			402.514	1177.62		1037.27		1112.76	860.893	633.381	750.642				2375.19	1149.3												935.722	4340.53
A0A0J7KWD2	Vesicular glutamate transporter 2	244746	5030.49	113984	1357680	1443890	355131	204452	1952960	320877	2732.91	728357	251231	481526	237725	443360	1969380	1164150	239848	1458930	547386	12434.5	799344	1219710	1712540	1055810	852681	428993	3570.3	4134.85	737809	170893	174588			1205290	1161740
A0A0J7KWF1	Radial spoke head 10 b2-like protein	15136.3		15718			13046.5	10782.8		13918.8		10380.4	10698.2	14804.1	13183.9	14484.1		17784.9	9283.84	17370.5	4335.08		15644.3	12301.2	1627.02	21828	9182.71	21296.6				5971.89	8025.57			11478.8	19575.5
A0A0J7KWF2	Titin-like	17287.6	13592.2	5126.63	3620.36	22946.7	21202.5	1691.65	11645.8	1201.2	33801.4	18516.4	29720.3	11246.6	13990.1	8695.47	84283.5	13114.9	9518.53	14769.2	13150.8	3889.94	9161.85	10629.2	11361.7	7206.13	5822.51	10724.7	53189.5	21201.8	9956.61	10017.4	5725.54	10247.7		12723.6	8025.02
A0A0J7KWG0	Radial spoke head protein 3-like protein	10882.4		13932.6			9190.77	12161	6655.58	12900.4		11486.3	8754.23	11115.3	10761.9	13094.2	3334.86	6502.12	9767.63	7357.04	2432.19		13242.8	6501.29		11963	9764.98	10014.3			9144.11	7300.68	9438.99			7656.79	10160.1
A0A0J7KWG3	Putative chitinase 1 (Fragment)							500.712			15663.3										1410.75											1274.13
A0A0J7KWH4	Neurexin-4 isoform x3	1733.83		8746.9			1192.3	1179.07		1574.43		8204.08	1780.63		1826.39	698.724		2862.74	4439.74		1265.02						2136.66	1999.24				1646.31	9173.37			1696.31
A0A0J7KWI6	Regucalcin	56832.2	771273	112780	1041940	645707	289110	39845.8	1338770	31608.4	3008740	90706.1	183088	120141	104643	42627.7	1710880	314972	60211.3	606484	1121600	293086	62401.3	121190	1678560	181173	60832.9	106382	1802990	1602900	235099	62184.9	62103.1	254894	128765	88256.1	181942
A0A0J7KWI7	A disintegrin and metalloproteinase with thrombospondin motifs 7	1720.61					985.523	1557.06		2431.71		1596.62	2081.66	1509.49	1572.56	2061.16			1518.79								4704.76					1338.29
A0A0J7KWI8	Plexin-a4 isoform x3	1214.8					688.045	658.53		497.134		318.165	1244.19		804.607	1312.26			978.729				478.262				1392.6	709.309				2680.87
A0A0J7KWJ3	E3 ubiquitin-protein ligase rnf123	17960.7		16849.9	50537.9	52201.4	18055.7	13912.7	52634.8	28070.7		29225.9	10851.8	17286	16198.3	25801.8	56768.7	30209	15137	35361.5	38857.9		13919.6	22789.4	66185.4	31447.9	37863.9	16748			25668	18481.4	35726.4			41991.3	19934.9
A0A0J7KWJ8	Lysosomal aspartic protease	7046.89		29627.4			32483.7	3811.09	11810.8	3009.7	2739.91	11749.4	18723.6	3206.3	25492.7	3898.39	4464.57	6562.67	69565.8	16260.1	5755.87		4223.76	7690.41	2872.43		4028.58	4851.26			10277.9	35692.2	33186.9			20082.3
A0A0J7KWK7	Eukaryotic translation initiation factor 3 subunit A	2063.62		2623.47			1842.63	857.628	2653.84	735.879	2569.69	2583.49	2052.86	1909.23	2074.4	1116.86		2394.37	1867.69	1279.79	1237.17	4778.82	3485.86	1756.05		2690.67	4177.66	1667.86	1446.62	9807.1		2248.19	4111.28			2261.18
A0A0J7KWK8	Mucin-like protein		6271.2								57884.1					41087.9													13060.9	5525.25
A0A0J7KWL1	Troponin t (Fragment)	1608.95	7961.71										7876.33			1562.74						8853.65				9442.75			3363.27
A0A0J7KWM5	Glutaredoxin-c4-like isoform x1 protein	3255.98	9955.63	5453.33	6214.83	7844.77	8474.13	1574.33	5806.99	1051.73	15145.7	1762.76	9605.69	8710.88	11437.1	2692.83	5578.88	5911	2271.14	6308.91	9439.69	5898.32	10174.9	15006.9	4925.66		9750.61	11565.9	25259.2	29573.4		6840.51	3596.39	16022.7		11721.1	6116.27
A0A0J7KWM6	ATP-binding cassette sub-family B member 6	1615.78					1792.62	708.028		1820.35		1160.8	1467.67	1672.29	1598.29			1675.16	1937.93				2230.96					849.503				1984.49	703.506
A0A0J7KWN0	Calcium calmodulin-dependent protein kinase kinase 2 (Fragment)	2214.96		3586.51			1003.7	661.11		395.01	2990.51	1266.27	3085.63	1358.96	1132.75	2066.78		1830.54	1182.8	568.403	1185.75		3371.75				457.503	1585.31	2380.55			3365.39	1874.45
A0A0J7KWN2	Cdk5 regulatory subunit-associated protein	388.739		1627.41		2049.42	535.545	425.757		438.671		841.634	455.41		365.925			1198.01	550.832	1151.51	1549.26		3566.65		2372.15	1443.43		1119.29
A0A0J7KWN5	Sodium-coupled neutral amino acid transporter 7	719.427		807.132						707.89		709.303	269.907						537.323														825.854
A0A0J7KWN6	H/ACA ribonucleoprotein complex subunit	549.801									1040.77		819.285		748.968				659.687				838.951				1865.47
A0A0J7KWP6	Coiled-coil domain-containing protein 6-like protein	4207.01		6992.94	10347.8	9449.82	4320.48	3636.18	9734.94	5150.84	2724.76	7768.23	3562.71	6079.82	3960.04	7533.75	16283.8	5682.08	4527.74	7906.77	12587.8	6314.97	8767.29	5310.34	12506.6	5887.64	4314.85	5010.95				9151.91				3239.68	4048.98
A0A0J7KWQ2	Sap domain-containing ribonucleoprotein	1299.42					758.426	310.28			1247.59	1525.57	1623.04		1295.35	920.943		1678.11	1278.94				2126.21				3170.71	2823.72	4558.42
A0A0J7KWQ8	Charged multivesicular body protein 2a	1608.91		1146.32			2509.07	1868.28		1727.5	2523.28	2321.36	1835.01		2275.37	1603.65		1439.8	2222.46	2749.52	4020.18		3412.68				1887.57	2640.69	4013.36			3514.04				2776.92
A0A0J7KWR2	Cytosolic purine 5-nucleotidase isoform x3	3219.12		4201.97			3722.95	1543.66		621.473		2717.23	4014.89	2296.47	4116.8	1280.96	2040.98		5295.59	4205.47	974.928		4197.82	3185.88			3851.45	2083.34				4031.92	1812.24			4977.64
A0A0J7KWR4	EF-hand domain-containing protein	182820	7687.32	162233	4045.51	4556.3	123288	151931	39714.4	176159	3049.95	172941	124350	111971	133734	154663	14205.3	83395.5	170992	78811	19461.7	5698.12	137741	97775.8	5831.83	88367.8	99811.6	132463			46835.1	144361	179873	12043.7	303954	47062.9	88953.7
A0A0J7KWS5	Adp-ribosylation factor gtpase-activating protein 2	1001.22		2368.84			962.492	780.694			1850.7	904.409	2855.52	1190.23	934.312	1839.61		1330.27	1125.43	1378.79	994.599		2048.21	1173.56			1046.02	1165.41	2429.35			2023.4	1147.91			710.617
A0A0J7KWT4	Zinc finger mym-type protein 4-like protein			320.485		488.912	163.343	80.8036		202.038		341.412						336.801			2842.59
A0A0J7KWT7	Hydrocephalus-inducing-like protein	9701.94		17059.7			7934.49	14580.2		12682.4		11439.2	5902.12	4157.49	8236.18	2926.47		6091.02	6105.82	3755.68	770.595		7470.63	3171.53		4096.09	5028.38	9085.02					4951			3565.24
A0A0J7KWU3	Beta-hexosaminidase	3412.72	4748.91	9641.17			44783.8	4696.07	5006.19	3500.21	17703.9	1787.49	4743.33	1315.63	5264.08	4056.78		4050.04	8849.4	7575.74	1506.08	11929.3	4570.69	8598.69			7398.66	3278.48	4632.56			7145.44	8320.13			3429.65
A0A0J7KWV8	Retinol dehydrogenase 11-like protein	2356.55	6260.58	5190.88	10321	6009.49	2400.38	2979.08	11388.5	2196.47	2298.19	6348.88	3594.36	3438.13	3156.85	5572.31	9304.8	7344.14	2822.19	6518.57	4107.57	2847.09	4874.94	5340.21	5096.73	9814.45	4909.64	4479.76	7736.32	5110.95		3185.1	4643.42	8091.76		4110.37	3966.8
A0A0J7KWX3	Inositol polyphosphate 5-phosphatase k-like protein						342.243					423.807	176.51		284.209			623.313					533.295					164.311
A0A0J7KWZ1	Vesicle-associated membrane protein 7	891.225		1232.03			979.575			485.041	465.494	656.678	1130.97		806.148				1772.53			3593.49	1930.88						907.039			756.006
A0A0J7KWZ2	60s ribosomal protein l37a-like protein	992.635	2181.64				1738.27					1220.41	1917.56		1838.03				1049.21				3339.62	1956.5			1408.34
A0A0J7KWZ9	Protein i m not dead yet	3104.46		6150.88			3018.49	7524.64		2915.24		4304.02	3794.83	2712.86	3076.26	2209.6		5132.51	595.55	2673.79			3792.52	2558.19		3503.65	8006.3	2399.67				5153.76				7246.41	2897.81
A0A0J7KX05	Gtp-binding protein parf	1284.87		662.75			364.455	446.165				484.597	1133.91	686.585	646.945	1448.75			1435.33				1532.64	1106.79			591.321	1158.92				2340.65				1409.06
A0A0J7KX09	Eukaryotic translation initiation factor 3 subunit C	1253.03		5371.62			670.076	293.321	36042.9	350.383	931.241	1152.87	970.322		893.308	985.173			1016.47					3969.32			19698.6		1233.97	5052.55			6846.57
A0A0J7KX19	Malate mitochondrial	210734	4934.85	143160	5002	5337.09	137094	265296	56207.4	205164	1617.09	172118	151341	148851	152624	163019	16969.2	119219	237255	97192.8	20378.8		124485	40884.4	6436.44	120843	75325.1	153733	846.41		47706.7	153463	178543		488622	20142.1	77833.3
A0A0J7KX27	CASP8-associated protein 2	4301.48		7010.25		2494.33	4414.37	4375.59	5163.1	4348.26		4324.42	3317.67	5463.28	3540.61	4257.79	5966.83	4777.27	3823.92	8315.83	4815.38	1781.62	4660.54	2207.89	4215.52	5937.44	5128.07	5701.48				3894.15	6227.42			2139.86	8406.01
A0A0J7KX28	3,2-bisphosphate nucleotidase 1	6293.44		4038.13	11591.6	15072.2	8796.41	11652.9	9274.29	8327.37	820.998	8482.75	7024.86	8477.9	6988	4125.91	7283.74	5714.37	2937.45	12677.8	7885.65		13239	4233.17	16134	8457.49	6428.63	11035.1				4176.73	5753.24			5277.63	8244.9
A0A0J7KX40	Death-associated protein 1-like protein	11902.2		11407.5	2707.08	6224.58	18612.3	2228.12	3396.25	2166.67	70072.9	8451.98	23563.2	22013.9	12676.1	8141.02	8428.33	9931.28	11175.7	36072.6	14327.7		12309.5	38825.8	6195.97	9284.11	15978.8	13574.6	20627.7	8835.98		8444.58	6050.02	3730.33		29213.2	5823.13
A0A0J7KX42	von willebrand factor type egf and pentraxin domain-containing protein 1						580.556	1034.91		1700.83									836.97
A0A0J7KX45	Gamma-soluble nsf attachment protein	2868.07	2180.83	789.801	3813.58	3998.57	3183.05	1083.87	3908.71	1481.1	4928.73	2966	4760.81	4307.73	4050.77	2541.66	5252.66	4657.98	1608.64	4419.36	4464.45	5522	6321.16	3251.15	7039.92	8112.56	5196.71	5605.58	8099.49	7254.31		2358.75	20209.4	7763.48		5993.34	5745.85
A0A0J7KX49	Microtubule-associated protein futsch-like protein (Fragment)		2540.53								2361.49																		2491.86
A0A0J7KX50	Math and lrr domain-containing protein	38581.7		116108	37807.2	48492.9	51297.7	58862.7	52580.5	109824	3507.21	93785.7	57174.1	30620	74072.1	28574.9	49165.2	53859.2	56068.6	45401.5	71437.2	5300.35	49670.4	12672.1	58072.4	59788.4	31620.1	38057.3	2366.82		19252.9	27984.3	51979.6			10229.4	16754.4
A0A0J7KX59	Sorting nexin-30-like protein	315.462	1391.48	544.763				407.176		422.694	505.119	1010.48					1882.1			790.885
A0A0J7KX69	ZM domain-containing protein		2282.74								10823.4				594.519								1258.84						824.195
A0A0J7KX72	S-adenosylmethionine mitochondrial carrier	10585.6		30130.6			5391.48	8874.51		12983.7		19676.1	869.943	809.889	4012.55			3067.63	16314.9	4987			3502.78	609.208				3143.2					22253.7
A0A0J7KX75	DUF4789 domain-containing protein	1659.29	14890.1	2575.89	2359.78	3070.1	3084.65	1798.4		977.853	57630.2		1752.91		3268.01				3113.33	4089.44	2590.58	7303.46	2435.47	1318.33		3770.19		2276.38	13121.3	7284.45				6579.39
A0A0J7KX77	Transaldolase	40984.2	17370.8	85751.2	7899.7	13313.8	69069.5	24145.9	30092.2	9461.54	112666	39280.5	56590.7	61608.2	66591.5	25893	9087.94	46500.7	76136.5	81005.7	48017.1	34426.4	34253.2	40200.8	11459.4	27434.2	33149.1	41637.2	21048.9	8586.56	27114.7	74993.4	55527	5337.91	35098.7	15588.4	21416.5
A0A0J7KX82	26s proteasome non-atpase regulatory subunit 12	5259.06		4539.81	15045.2	15865	3953.16	4456.02	15610.1	6479.03	1524.62	6687.34	2711.36	2846.86	3493.99	7591.16	12414.8	8496.63	6344.43	12147.2	8828.99	6927.7	4570.68	3967.27	8383.65	8122.2	7912.27	4791.54				7502.74	7821.67			6554.72	7538.2
A0A0J7KX84	Beta-amyloid-like protein			2219.1			1138.67				876.71		1553.14		1457.18				1894.67					2660.21				1425.05								2555.11
A0A0J7KX86	V-type proton ATPase subunit C	882.894		1521.28			1106.92	1050.16		701.037	1281.88	1297.04	2084.76		2536.63			1136.17	962.84			7972.8	1355.85	466.56				2411.43	3350.37
A0A0J7KXA6	Prefoldin subunit 3	2326.92		20873.9	2605.25	4141.14	3972.83	1822.84		1104.12	1540.03	1939.1	4151.33	3523.69	3483.55	1689.86	5956.43	2933.37	1284.83		6907.02	4430.83	4648.07	3620.12	2852.03		3575.7	5171.95	1836.51			3008.84				5416.49
A0A0J7KXA8	Uncharacterized protein C05D11.1 (Fragment)	11432.5		9143.24	15546.3	15304.5	15322.1	7706.31	20525	9822.88	7079	16374.3	10625.3	10280.1	11076.7	9846.83	19281.5	26159.7	8902.01	15983.3	18283.5	3922.22	17240.8	10302.9	19421.2	20839.8	17665.2	15951.6		2344.92	18223.8	8650.46	9222.12			13493.7	20096
A0A0J7KXB0	Poc1 centriolar protein a-like isoform x2 protein	1506.98		2490.46		1562.98	1139.91	1142.82		1178.74		914.152	1270.93	1761.71	1220.62	2715.84			1065.82	1503.44			1886.2	1802.34			1271.62	1803.87					2907.69			2138.15	3892.6
A0A0J7KXB1	Myofilin (Fragment)	10987.3				664.624					1225.95		9064.36							2895.85		7508.46			687.971	17497.4		2454.86
A0A0J7KXB3	Nuclear pore protein	4063.31		4099.79			2812.21	2977.71		3490.54		3909.09	3421.22	3513.85	3266.33	4896.05		3618.84	3148.67	2530.57	1034.17		3734.51	1701.3		3738.07	4229.9	3458.27				2590.45	7732.81			4200.7
A0A0J7KXB5	Rna-binding protein rsf1	3052.22		1530.23			1455.63	384.057		370.647		1564.2	1755.01		1493.3			965.867	1480.12			3153.42	3461.45				1499.88	963.46				2652.98
A0A0J7KXC5	Ubiquinone biosynthesis monooxygenase coq6-like protein	9984.27		8565.4			6350.91	8685.14	3914	6760.36		5906.37	6815.59	10476.1	4849.12	6262.19		6209.98	5241.77	5084.49	2193.94		7628.18	3169.78		14013.9	6799.26	11270			25026.5	6117	11857.5		17614.5	4040.72	6700.88
A0A0J7KXD1	Laminin-like protein epi-1 protein	1490.56					1884.07				1015.93	1165.12	1360.4		1948.72				3347.6			3806.21		467.663			1394.16					8545.79	1517.32
A0A0J7KXD2	Ras-related protein Rab-14	1288.14		2310.9			941.788	1096.53		1208.3		2487.63	1400.85	999.225	1276.02	778.705			4429.03	1266.95			1104.91	1336.67		1855.08			1193				3341.46
A0A0J7KXD6	Ras-related protein rab-5c-like protein	4996.25	9270.26	8572.25	12333.8	4307.69	3278.8	2820.83		2274.67	2450.23	7155.56	6462.28	2604.91	4397.74	3647.17		3381.54	7844.26	3507.16	1786.49	4540.82	5425.47	2159.26	4481.46	5509.16	4901.73	3035.79	5812.12			8146.64	7297.62	8726.81		1661.27
A0A0J7KXE4	Membrane metallo-endopeptidase-like 1-like protein	557.804		1867.7			229.764	587.002		370.187		606.483			168.94				600.083														1733.19
A0A0J7KXE5	Regulator of nonsense transcripts 1-like isoform 1 protein	1030.56										863.103	944.931	687.688	380.267				617.401													442.384
A0A0J7KXE9	Nadh dehydrogenase	12911.3		38886.8		1984.48	11411.7	24423	5684.07	20112.9		17436.7	10744.3	11450.6	11918.8	6904.19		9326.24	16463.6	4520.66	2036.55		8295.1	2321.98		10324.8	3225.97	10971				3710.6	34164.9			1796.44	4006.26
A0A0J7KXF0	Sperm flagellar protein 2	90901.7	3119.07	126909	8366.43	7524.16	77693	100814	39654.8	105051	6116.18	106503	70413.8	86186.1	87901.8	98129	11011.1	65908.5	86419.1	73165.1	16809.2		80062.1	53630.2	9433.59	80249.3	71261.9	97787.7			34644.3	63930.5	98833.8		222843	90339	69188.6
A0A0J7KXF1	Rcc1 and btb domain-containing protein 1	1747.99		660.718	4753.2	5164.2	1417.54	600.444	4725.83	2411.2		2378.4	1359.15	1217.62	1257.31	951.116	4557.31	5350.79	1200.54	4985.39	5429.28		1850.32	675.343	3728.81	3778.94		1927.59				2481.87	1898.03			2011.23
A0A0J7KXF3	Ring canal kelch-like protein						288.452				6581.87										358.764						507.024
A0A0J7KXF4	Gamma-glutamylcyclotransferase	3611.99		2175.17	6109.77	5062.69	4616.44	3840.87	6773.92	3906.88		5094.9	2140.83	2007.5	2488.35	5260.27	3293.97	6144.44	2033.6	4630.7	8248.39		3180.12	1351.55	5951.66	3645.03	4788.93	3225.3			5864.92	3654.62	1442.15			1606.37	3567.4
A0A0J7KXF5	Sodium/potassium-transporting ATPase subunit alpha	42584.1		76775.9	99917.6	154302	75547.8	60007.2	135139	69946	4345.2	85122.3	29418.3	39777.6	41625.4	52009.4	144537	121102	44856.7	140063	130569		58388.8	37172.1	174548	87209	76414.8	71092.3			108166	31951.8	47484.2		112136	65527.8	80795.1
A0A0J7KXG8	Putative chitinase 3-like protein										5117.97											7916.86
A0A0J7KXH2	Adenosine kinase	2569.78		2258.76		1389.56	3462.03	2227.69		718.413	886.84	2346.97	2409.24	5403.21	4199.48	6857.85	2021.72	857.1	2961.77	1733	2961.64		2741.14	3924.83	1436.9		6131.64	1643.6	1803.65		7320.36	2225.84	9261.36			3535.71
A0A0J7KXH3	Afg3-like protein 2-like protein	8565.59	3853.65	14121.2	1852.38		6794.79	9303.61	4758.63	7736.73	1386.74	7217.12	5813.16	9131.3	6563.94	8547.77		5412.09	7940.64	7434.45	3787.46		7060.38	4442.61		6075.89	6596.06	9086.77	1248.13			8868.87	17099.2			8497.05	7191.9
A0A0J7KXH8	Peroxiredoxin-6	7857.83	2955.14	2894.32	4998.95	5841.44	8848.28	4027.42	7685.71	3491.66	2169.58	6542.46	9293.41	7712.24	12257.5	8455.92	6778.03	4432.58	4598.75	8508.06	7156.96	8649.65	10931.4	8310.95	7890.94	9011.89	8640.83	5924.34	3788.9	5638.22		13420.8	2912.86			5232.97
A0A0J7KXH9	Glucosidase 2 subunit beta	1260.89					760.97	943.594		613.924	1179.54		904.478		554.663	477.105			650.014				1084.68	904.626			718.082									1236.53
A0A0J7KXI8	Cilia- and flagella-associated protein 206	4154.44		11459.4			3516.44	4229.72		4876.61		6660.44	3241.38	2167.63	3702.64	3305.14		1845.13	5948.91	3472.09			3565	3795.3		4145.67	1850.38	4292.82				3778.5	17512.9			7764.04	3306.12
A0A0J7KXJ1	Cilia- and flagella-associated protein 77	281255		347173		7485.34	267794	430432	53158.5	461052	10803.1	290910	198951	100771	267480	54045.4	18014.9	201210	236595	114593	48201		260001	76042	10733.7	162465	87912.3	261581			24777.8	165589	240556		221261	39367.2	98076.1
A0A0J7KXJ2	Protein tssc1-like protein	614.083		765.892			290.165	235.464		376.437		882.674	668.814	255.086	390.939	255.557			824.378				1046.48										985.92
A0A0J7KXJ4	Tropomyosin-1	2698.58	3526.63	6873.71	1728.79		3336.71	647.282		1214.53	3126.84		5136.18	6110.4	2681.07	9079.15	8292.71		1762.21			8984.88	2099.64	647.545	2926.38	30733.1		2663.71	8481.57	5452.72	32529.6					2469.78	11420
A0A0J7KXL4	Sodium/hydrogen exchanger			586.751			143.431	63.9458					305.514						158.122
A0A0J7KXL7	Alpha-aminoadipic semialdehyde mitochondrial	1149.15		962.266			930.866	669.645			3023.41		1960.75		951.222	1105.84			832.942					1067.16				1389.03				1204.51
A0A0J7KXM1	Calponin homology domain-containing protein												6913.01			1212.76						3668.56				15134					10624.4
A0A0J7KXM9	C2 domain-containing protein	895.299		364.364			542.322	267.908		260.636	1810.47	791.267	1266.85		616.818	1207.32			724.671	1428.78		3483.06	1348.22				1039.41		1698.11			3843.81	1561.08
A0A0J7KXP0	Ecdysteroid udp-glucosyltransferase	164749	5309.32	148050	4037.61	4670.83	123103	214142	43919	187908	2483.52	227428	138676	150842	143624	146432	10560.7	73868.9	183735	76426	7767.59		143140	152281	6869.59	66965	178626	118137	2425.11		55220	102881	620044	12060.8		99045.9	119579
A0A0J7KXP3	Putative coiled-coil domain-containing protein 147	64845.9	17461.3	81499.2	4319.69	4284.37	60718.3	58438.7	26599.3	69934.8	11765.2	70718.7	45283.7	56632.3	57345.8	48336.2	8564.46	54000.8	59504.1	49537.2	19724.9		55043.8	33895.9	5171.64	59700.2	46040.9	69235.4		17391.2	28254.7	38703.9	76407.6		255926	41727.4	67588.7
A0A0J7KXQ1	Nitrilase and fragile histidine triad fusion protein hit	5860.42		11162.7			6289.89	11419		7080.2		8178.77	5508.26	7399.6	6976.15	5409.62		5582.35	10861.1	4683.43	2153.49		4822.1	2777.66		3749.41	2541.86	10876.5				3298.9	8909.42				10300.9
A0A0J7KXQ5	Outer dense fiber protein 2	907616	22734.2	834585	29736.3	44437.8	650923	669981	257799	858970	20826.7	884928	707077	778458	599181	874093	137123	572186	748386	576783	246271	23408.7	635287	487178	71452.1	702826	628065	657753	5391.67	14047.3	215112	484510	728357	31203.8	1722960	572760	666264
A0A0J7KXQ7	Rna-binding protein ews	962.038		382.294			461.812	97.6704			646.529	612.742	566.828	717.806	582.026	610.041			414.34				2507.43													1125.1
A0A0J7KXS2	Collagen alpha-1 chain (Fragment)		2527.13								16783.7									2317.7	1715.57	3346.21				1532.48			3135.61	3232.67
A0A0J7KXS4	Adp-ribose mitochondrial	1899.36		4515.42		1862.86	4769.61	6746.4		3861.15		1991.33	4246.13	6342.16	4410.53	4155.87		3364.35	5936.07	14620.6	4084.6		2920.39	1488.66		5475.34	3025.83	5280.78	16870.8			5052.82	6298.07			2814.94
A0A0J7KXS8	Ankyrin repeat domain-containing protein 26	22298		39312.3	842.57		13257.4	20937.4		22798.3		34304.8	7833.23	12610.3	11096.8	5099.08	3368.38	10928.7	47684.6	10191.7	8154.74		20104	1824		10306.4	4955.52	8421.38				25422.5	84314.7			2379.93	6419.17
A0A0J7KXT5	Putative glutamine-dependent nad+ synthetase-like protein			815.925															195.878
A0A0J7KXT7	Haloacid dehalogenase-like hydrolase domain-containing protein 2-like protein	2285.84		2930.91	6449.71	9816.63	3617.39	4530.85	17717.6	3291.97	2025	4226.25	2278.46	5005.49	3956.75	3834.34	14527.1	12990.4	2052.03	4775.5	17813.4		1847.52	7409.69	10734.5	17210.7	7412.22	4799.03			14749.3	609.317	5485.75			14635.7	9686.81
A0A0J7KXU1	Leucyl aminopeptidase										1616.02				1362.02							6702.46
A0A0J7KXV0	Putative trans-2-enoyl-mitochondrial-like protein	50472		182153		2118.94	44043.5	55274.8	10895.2	56073.6	4919	42467.5	32312.9	35729	33801	39872.3	3942.42	36636.1	31603.2	26746.2	5737.66		55646.9	65343.7		42780.8	65897.3	60627.5			19030.6	20379.4	39035.8			40203.2	35893.9
A0A0J7KXV3	C-myc-binding protein	8184.46		36292.1			5742.61	14714		9925.27		6194.56	8967.05	17853.8	7104.56	11263.4		5588.81	18904.5	7993.87	2699.41		7285.13	13232.6		3368.79	2868.64	12181.7				6574.79	38281.3			15506.8	3364.91
A0A0J7KXV5	Dynein heavy chain axonemal-like protein	1393.03		2804.73			1067.54	906.799		1185.99		2632.98	1281.38	2424.53	633.314	1540.79			2069.61				2221.19	2446.12									5271.77
A0A0J7KXW6	RING-type E3 ubiquitin transferase	1236.29		480.802	46776.4	2203.66	2228.91				5916.03		940.159	2310.13	7448.43	2078.76		5794.23	433.729	16102.3	1510.6		5648.39		7620.27			2620.46
A0A0J7KXX4	Clathrin heavy chain	4491.81	14241.7	3450.64	8305.79	2045.35	2060.49	1373.21	8356.05	1498.46	4742.76	3994.1	4118.36	3798.89	3118.85	3438.53	2798.17	2762.24	4931.27	3925.87	2677.22	10145.3	6373.16	2482.56		6952.41	4543.44	2206	2771.06		11740.7	3187.31	11325.7	1750.36		6062.53	7042.17
A0A0J7KXY2	Microtubule-associated protein futsch-like isoform x11 protein	1688.17	3269.17	2038.68			2157.91	684.631		851.837	5945.48	3959.71	3707.67	1941.77	1606.36	1402.42		4545.94	2272.23		1045.87		4145.11	1710.09		2579.31	1506.28	2502.64	5285.24	7081.7	4535.66	4756.28	4537.3	3083.09		1056.72
A0A0J7KXY3	Serine hydroxymethyltransferase																					9238.25
A0A0J7KXZ0	Ornithine aminotransferase		53566.2		4375.73		1902.71				6745.63								1985.76										2011.62	10800.6
A0A0J7KXZ3	Uncharacterized protein	2265.39		5228.62		857.978	3584.62	4540.8		4274.03		4063.88	2441.43	3617.37	1864.84	3879.91		1967.76	2889.97	4754.05	2856.8		3808.64	1425.02		5146.53	2711.3	3287.13				2532.32	4383.5			1739.02	3570.31
A0A0J7KXZ7	Alpha-galactosidase	3847.62	4805.34	1485.63	1164.67	2031.51	14998.9	643.317		1690.33	7651.44	1212.95	1356.81	1527.07	819.444	2203.34	1761.71	2211.48	2463.29	1519.71	1201.37	7484.77	897.282	468.925	1298.61	1174.2	1922.29	1444.44	3393.01	11118.2		2270.42		4946.84		787.694
A0A0J7KY03	Vinculin	4270.24	3015.93	4220.12			3556.86	1230.36		1100.81	2207	3632.19	5520.01	3557.03	3903.18	3012.38		2592.43	4677.55	1819.77	1629.45	14261.6	5108.07	3062.41		3657.81	3077.46	2376.35	2930.35			4265.81	3576.86			6879.8	3910.16
A0A0J7KY06	Ubiquinone biosynthesis monooxygenase coq6	3195.82		12541.3			2405.34	4670.88		2850.06		2758.48	1944.39	2103.42	2388.63	3575.99		1032.65	3797.58	1462.21	3892.94		1734.18	5553.84			5761.39	2785.22				3692.09	8034.98			3435.42
A0A0J7KY14	Ankyrin repeat domain-containing protein 39-like protein			3641.98				163.739		61.0693
A0A0J7KY16	Dynein light chain roadblock			376.009			291.586	486.1		252.919					361.288									610.059												695.853
A0A0J7KY25	Inorganic phosphate cotransporter-like protein	273863	11562.2	219695	1384270	2012040	282206	230931	2336750	238722	12630.4	684252	277607	236779	358726	77431.2	2479110	1684310	232184	1663210	1242460	15096.8	1023160	217284	2799160	1109840	380906	959592	9793.84	14011.3	593753	21779.9	292795	2629.74	283144	187763	327833
A0A0J7KY31	Putative transmembrane protein 120	2120.15		8955.68			1856.82	1052.32		1834.09		2877.28	2562.45	1221.76	1945.43	1813.94			1670.39				3546.95				1166.3	2119.59				3188.44				1435.71
A0A0J7KY36	Meiosis-specific nuclear structural protein 1-like protein	30053.1		28916		2853.57	36022.3	29682.6	18594.4	21795.5		26541.1	26709.1	27099.8	30458.7	16434.8	9199.21	31421.1	16936.3	34808.6	15619.9		31174.8	21614.5	3607.28	35535.9	23138	42815.2				20664.7	23528.4			34374.4	25696.6
A0A0J7KY48	Wd repeat-containing protein 63-like protein	12253.7		32932.4			11814.7	15016.2		19672.9	966.573	17985	8227.28	6503.23	10015.9	5066.09	78628.7	7040.2	19324.2	9652.54	4708.59		11592.9	7491.64		9867.9	14505.1	12991.7				8577.65	42663.9		81209.4	19510.4	15720.5
A0A0J7KY54	LIM domain-containing protein	2072.85		1532.51			627.129	658.68		431.161		1423.31	1310.06	759.767	2263.58				2119.45				820.887					871.705
A0A0J7KY61	Tektin	165427	5283.52	170501	4763.56	4810.77	151719	176192	54769.5	170849	3757.67	163190	111751	142282	131450	114473	16807.3	113078	132102	105460	27529.3	3472.52	129154	76069.3	10007.7	110799	82745	175217	2359.56		36322.5	74831.9	190540	10872.8	284961	57344	106909
A0A0J7KY74	Histone-lysine N-trimethyltransferase SMYD5			2062.51			1337.25	1303.08		1670.81		2648.43			1352.73	1629.17			1302.15	2113.65	1174.32											2499.29
A0A0J7KY81	DNA-directed RNA polymerase	255859	22268.3	466642	9745.87	11275.1	229482	281404	102278	316757	18933.3	298294	191661	202489	215320	184614	30344.6	205376	264630	194869	29906.3	9913.94	257972	131353	17680.1	206423	178332	284980	4871.79	6837.79	93087.7	212853	294123	38679	687175	101964	222821
A0A0J7KY97	Nucleoporin NUP35	847.842		1112.16			462.496	754.232		1353.01		1263.3	572.993	894.869	771.853	639.635		781.209	966.676									769.347					1451.27
A0A0J7KYA3	Papilin-like isoform x4 protein			917.216		9909	1785.11	504.393	5176.37		2885.96	1096.72	1401.23	1268.89	1298.63	1081.76			2243.47	4885.96	3689.42	6578.48	2013.91	1523.95	5606.81	8960.18	1507.49	3236.83	2405.92	3339.93	7061.06	6462.33				3600.65	7060.89
A0A0J7KYB2	Plexin-a4 isoform x3	4552.22		5012.73	1126.78	1337.46	759.631	568.719		737.124		485.53	1173.12	862.113	1088.14	1344.64			393.209	15653.6	1021.25		1121.53		2002.82			881.824				3054.64				3485.01
A0A0J7KYB5	Methylcrotonoyl-carboxylase subunit mitochondrial	16434.7		6535.02			9069.47	9972.56		2592.62	699.745	11905.5	11634.2	18174.5	11005.8	20280.1		2576.58	9695.02	8673.41	3155.68	3002.96	7770.26	5738.41	1638.44	5926.96	6340.5	11286.3	1147.16		5557.05	12739.3	10575.7		9526.36	4060.15	10271.3
A0A0J7KYD0	60S ribosomal protein L31	4654.96	7612.58	1313.25	5483.55	1574.21	2413.33	613.243		868.005	4513.58	3431.98	7259.44	5491.58	4530.6	3433.36		4541.24	3627.33	2565.27	6232.98	1914.66	4241.83	11624.6	3321.87	6795.93	4392.7	2787.34	7426.83	2433.69	4522.05	15620.4		1979.98		19736.9	8089.14
A0A0J7KYD6	Cystathionine beta-synthase	1849.71		3965.67			1070.84	706.081				1557.3	2010.43	1232.48	2281.06	1296.78			1365.34				2726.3	5520.84				1825.79								3802.03
A0A0J7KYE3	Neurobeachin-like protein	1087.56					591.642	320.461		486.5		1190.16	1192.01	906.269	1007.64	1429.12			2158.33				3557.97				1601.72					1733.4
A0A0J7KYF1	Glutamine-dependent NAD(+) synthetase	1430.66		5146.22			1121.91	842.159		1248.77		1556.42	1413.55	759.986	1263.57				1874.37				2135.57	2617.48				1693.73				2177.29	2420.42			4438.4
A0A0J7KYF5	Protein-tyrosine-phosphatase	8990.32		12239	9302.09	26353.7	15481.2	14408.7	28027.4	14707.2		14126.3	3458.86		10167.4			13345.3	3901.64	12480.6	26209.1	5425.5	20331.7	16734.5	39285.7		8040.37	14421			6539.61		7653.71
A0A0J7KYF7	Heterochromatin protein 1-binding protein 3-like protein			1532.73				237.512			3629.52		500.423		1459.32			1005.27	682.29		611.173							949.05	1507.41				564.471
A0A0J7KYF8	E3 sumo-protein ligase 2	59277.9	161861	28347.8	6696.74	8944.75	31353.7	24464.7	11466.8	15994.5	258137	34042.5	76578.6	27127.6	37279.4	29962.5	8957.89	14879.3	56496	41282.7	14475.6	7168.47	53776.7	34579.7	10644.4	15305.4	24052.2	14226.3	32059.1	7613.57	89416.6	38604.2	34747.1	1052.94		60103.3	16892.1
A0A0J7KYG1	3-oxoacid CoA-transferase (Fragment)	5425.2	4234.35	8028.24			4553.29	4384.85		4245.92	4538.68	4766.06	4009.02	5575.84	3155.78	4920.23		3770.66	4252.57	4106.37	2760.2	3529.58	5679.84	2885.32		5869.07	4488.1	5758.34			11585.4	3357.37	15927.7			7138.04	6650.53
A0A0J7KYH4	Heat shock 70 kDa protein 4l-like protein	7329	3151.92	9761.59	4267.73	4290.18	7583.05	7512.03	8456.48	4306.55	3752.15	9685.68	9034.26	5582.83	9154.54	3684.89	8998.56	7301.15	10331.8	7948.56	5720.9	21442.9	10787.6	1971.26	5628.13	9188.31	6657.95	6263.92	5071.65	2739.19	15347.9	12622.5	5807.46			3949.63	4242.4
A0A0J7KYH5	Titin-like protein (Fragment)	2891							4854.96		3430		2608.14	7509.32		1011.45			3086.33			1937.66	2281.75				3812.68	3385.53			15083.8						27219
A0A0J7KYI0	Sperm flagellar protein 1	8940.11		15427.6		3517.55	9552.05	14684.5		8174.34		7610.08	8862.81	15222.8	5687.01	12739.8	4634.94	3531.31	6617.13	5166	6410.8		5172.01	3962.72	3547.33	11099	16936.4	10205.3				7838.23	10007.9			6754.5	7083.23
A0A0J7KYI9	Ornithine aminotransferase	1249.44		2815.76			2252.96	650.207			2320.69	2146.26	5843.76	1526.12	3495.48	547.479		1914.64	3687.33	6968.18	1370.72		2891.01	1681.21				1283.69				3977.04	6425.99			2045.56
A0A0J7KYJ6	Ef-hand domain-containing protein	414.934		467.689			393.742				995.569		624.091	618.343	176.139	546.974			285.766	2270.89	268.118								443.165			635.215
A0A0J7KYK7	Wd repeat domain phosphoinositide-interacting protein 3-like protein	1784.31		2466.15			1001.46	1845.81		2509.91		1215.84	1518.05		961.927	1346.77			1668.03								1193.52	1323.06				959.401	2246.94
A0A0J7KYK8	Dynein heavy chain axonemal	28390		31419.8			25196.7	30526.8	21931.4	34259.8	1444.93	29383.1	23560.2	29640.9	30170.8	35543.2	6410.78	23423.1	28225.4	22645.5	9433.32		30309.2	19430.1		34923.8	25832	32749.1				20888.3	30232.3			16634.4	33894.6
A0A0J7KYL4	NAD(P)H-hydrate epimerase	18641.1		27130.9	18396.3	12648.4	16238.9	18622.7	17667.5	16648.7	11467.7	21326.4	10453.9	12602.4	10247.3	13321.1	17721.2	21834.6	19042.9	21439.3	37095.1		13819.7	10955.5	19355.9	27228.8	13335	21594.2	1676.09		16700.3	11714.2	25674.5			24581.9	21365.5
A0A0J7KYL5	Gtp-binding protein rheb-like protein	1111.1				2548.67	3455.89	1053.8				1764.78	1965.76		4322.58				614.679		5323.36		3415.38					2840.32
A0A0J7KYL7	Calcium-independent phospholipase a2-gamma	3376.72		1152.77			1835.51	1590.83		2249.21		2554.1	1974.99	2951.79	2730.21	3131.69			3142.13				2251.14	4057.26		6343.25	2063.35	2700.83				2768.34	4444.33
A0A0J7KYM0	Phosphatidylinositide phosphatase sac1	1023.52					323.811	224.157		541.427	397.592		1664.29	791.832	854.648	797.879												734.971				1416.18
A0A0J7KYN7	Sex-regulated protein janus-a	221652	10308.8	210093	6487.16	7485.36	150684	118046	47708	194416	12010.9	232246	126179	175393	91507.5	170847	14606	75049	161750	121230	31516.9	9576.91	191265	40502	14256.7	82281.9	35909.2	88451.7	2220.72			39129.4	111521	7024.45	268804	9793.41	44623.1
A0A0J7KYP5	S-phase kinase-associated protein 1-like protein	852.441		663.407		1618.93	584.469	333.581		676.613		1279.94	864.025		616.737	445.569	3252.58		734.98	1445.53	3261.78				3362.65	2135.72		776.596								451.345
A0A0J7KYP6	Putative u2 small nuclear ribonucleoprotein a-like protein	1353.98		1355.2			987.044	434.969		352.988		1268.05	1825.98	586.937	1112.36	887.571		789.92	1724.16				1137.82	484.307				714.57					3127.12
A0A0J7KYQ2	Protein unzipped (Fragment)	20722.7		19291.3			16589.1	62322		13285.5		14024.4	12252.6	20642.1	17483.5			19690.2	12755.1	17701.8	6858.47		15564.5	6200.04		12967.2	28423.6	21605					12437
A0A0J7KYQ4	Ras-related protein rab-18-b	1806.2		3260.58	2583.75	1778.91	1575.11	1368.66		1695.66	1354.56	2878.14	2490.01	1867.63	1841.92	1693.95		2520.37	2765.58	1492.9	1944.33		1565.25				2230.68	1931.46				3765.78	3495.85			1384.67
A0A0J7KYQ8	Protein bric-a-brac 2	8095.29			60083.6		13539.5	3635.38		3999.84					14105.5	12564.5	52736.3							18357.2		31058.1		36558.1			38954.4	12673.5				41477.7	33892.9
A0A0J7KYQ9	Major centromere autoantigen	1923.25		4115.35			1562.21	2012.26		1485.8		1253.18	1976.91	1787.27	1051.91	740.2		1053.93	2079.61	1663.39			1662.86	1111.99		3214.09		1904.45					3413.57			669.408
A0A0J7KYR0	Sugar phosphate phosphatase	13911.6		21742.9	46857.9	37125.5	31005.5	22292.2	50956.4	30952.6		22301.8	8902.25	28968.2	33653	47902.4	54736.9	49671.2	10469.4	41639.2	34278.1	3852.77	22710.7	23045	51703.9	67326.5	27451.3	31326.1	1410.3		33723.5	10206.1	12167.1			20898.4	37730.6
A0A0J7KYS9	Hexokinase	57659.7	2371.21	106348	193282	256067	75844.7	59315.8	156045	80005.2	5095.72	104493	54227.5	90921.5	56050.1	95535.5	178861	185131	47828	232905	117097	16937.4	77362.4	113892	258520	186573	119520	92692	1938.32	14957.6	116752	81448.1	37519		229012	195978	216447
A0A0J7KYT2	Coatomer subunit delta	126.984		297.766			234.27					206.16	200.272	411.554								11368.2
A0A0J7KYT7	40s ribosomal protein s3	10695.5	13100	5335.41	13446.6	2957.84	9159.47	2694.74	3418.45	2690.99	4353.91	9101.41	8381.11	7908.38	9017.59	3768.17	9746.05	6266.52	9894.61	5090.8	4075.11	41854	10783.3	6945.44	3534.81	8537.88	4663.27	5443.72	9964.84	17138.1	10261.6	13988.8	4833.76	4011.41		3190.7	3885.64
A0A0J7KYU0	NADH dehydrogenase [ubiquinone] iron-sulfur protein 3, mitochondrial	4325.88		13640.9			7676.01	7247.37	6039.36	7657.97		6832.3	11067.1	10364.1	6688.5	4656.62		12089.6	6171.13	8323.17	3047.63		15914.1	4647.74		10578.8	5811.91	14596.8				8069.13	24861.8			2272.19	14455.7
A0A0J7KYU1	Dihydrolipoamide acetyltransferase component of pyruvate dehydrogenase complex										1497.65				873.797							7005.4
A0A0J7KYV2	Splicing factor 3b subunit 1-like protein	368.713		183.248			236.377				1547.89	361.79	422.658										317.167				348.408									1037.87
A0A0J7KYV4	Protein dj-1-like protein	128245	8859.65	98107.8	145852	173938	110290	118154	156698	125979	27188.9	136402	120141	179545	91095.8	140219	154401	233833	82104.4	210719	339014	21477.2	96329.4	89040.1	200279	162538	194750	118483	6309.06	7584.6	139419	123453	69026.2	20068.3	535025	304072	162275
A0A0J7KYV6	Coiled-coil domain-containing protein 108	2236.98		4573.3			2492.8	3271.25		4191.74		3695.26	1910.06	2377.14	2441.26	4651.97		2985.44	2863.5		2215.05		1425.26	2804.27		3116.1	2799.99	3156.58				3104.03	8455.24				1230.32
A0A0J7KYV8	Cysteine and histidine-rich protein 1-like protein	565.284					225.839					904.02	642.194	429.712	239.308				722.181													1791.32
A0A0J7KYV9	Heat shock protein 83	31151.6	24630.1	20803.4	30161.3	54550.5	31320.3	13481.2	68030.7	21334	22406.4	39056.9	29826.8	21265.7	22439.2	22974.5	109127	37440.1	25094.5	52991.6	52295.9	60502	27009.8	15600.6	60890.7	38715.9	26495.6	29113.4	22084.3	26568.3	35277.5	35763.2	20529.5	9973.29	77642.3	23731.6	37292.8
A0A0J7KYW3	Exportin-5	490.106			959.085		488.406	451.425					546.364		873.525	783.635																					14054.3
A0A0J7KYW7	Cobalt chelatase	1908.8		3474.74				1356.03							640.813	2027.92			589.786	4056.47	1888.63						1977.33					2550.68
A0A0J7KYW9	Protein lin-54-like protein	519.423		1019.72			309.6					838.757	570.811		498.488				385.206
A0A0J7KYX7	Unc93-like protein mfsd11 protein (Fragment)										8440.74																		6499.84	20243.8
A0A0J7KYX9	Glycerophosphodiester phosphodiesterase 1-like protein	880.532		1491.65			1018.62	1197.48		1445.52		1329.12	435.967	837.549	784.337	401.827			1126.77									822.697					3101.86
A0A0J7KYY4	Uncharacterized protein		3936.82	878.343							1671.94																		3132.84
A0A0J7KYY8	Neutral alpha-glucosidase ab	1271.49	4055.43	1148.77		1178.2	2417.28	1108.13	4056.89	1300.98	106941	1945.63	2498.28	1417.91	1805.87	2150.11	2843.61	2171.2	2011.23	7183.93	3584.66	5802.08	2087.27	2222.67			1644.12	1420.06	10690.4	30493.2		3007.08		3129.82
A0A0J7KYZ1	5-demethoxyubiquinone hydroxylase, mitochondrial	5492.19		3049.38			2701.21	4819.71		3823.5		4067.61	4158.65	2761.73	4429.91	2583		2453.99	3430.98	2013.78			4432.19	5034.38		4400.08	7240.13	4246.44				1743.19	3350.48			4773.57	5306.21
A0A0J7KZ01	Very long-chain specific acyl-mitochondrial	3157.9	10441.5	2703.16			2943.47	1563.84		1295.07	5901.84	4255.6	5970.5	3867.06	4364.1	1860.67		4271.49	1881.82	6312.96		5826.97	4771.34	2146.06		3422.32	4401.33	4501.86	3772.97			2924.62				3957.5
A0A0J7KZ07	Transmembrane protein 214-a	1878.34		290.441							737.235	1991.25	2070.59		1163.63				3103.97														7476.3
A0A0J7KZ13	Rna-binding protein squid	8350.01	13089.3	5445.65			9696.63	793.631		455.896	12644.5	4847.86	18279.9	9946.42	13498.6	2716.29		5635.03	2824.42	7480.95	6538.28	16773.1	20991.7	15053.4	3244.98	4652.9	11927.6	14935.8	17652.2		21386.6	4534.71	1959.57			18715.2	9927.92
A0A0J7KZ20	Serine threonine-protein kinase tao1	535.095		459.356			524.972	468.33		216.651	617.469	784.229	649.534	613.336	554.165				1540.51				1028.28						1032.25
A0A0J7KZ21	Phosphoinositide 5-phosphatase	562.76	744.023	781.729			611.539			354.801		848.425							667.991
A0A0J7KZ32	Na+ h+ exchange regulatory cofactor nhe-rf2	4469.3	3984.86	4420.57	3236.82	6804.35	9386.32	3505.04	6785.3	1511.3	7524.2	2931.02	7248.88	7659.2	12955.9	6078.39	6422.08	5013.44	6669.39	6404.9	3420.73	1519.63	17542.3	3058.88	7849.78	5715.87	15178.9	7639.47	20292.1	13247.1	19486.8	18593.8		3660.67		17946.2	6777.18
A0A0J7KZ35	Hydroxyacylglutathione mitochondrial	37845.4	4815.61	56023.5		3012.32	32746.7	72846.6	9615.3	42604.1	27907.6	30379.1	18806.3	13768.2	23895.7	18195.9		19752.5	38732.3	17483.5	8608.26		11672.3	17961.7		20124.5	34381.6	37426.3				29188	63487.6	59916.5		41959.2
A0A0J7KZ43	Nucleoporin 50 kDa	626.13		730.406			228.028				1220.09	997.533	611.026		440.639				456.574									693.683	2686.08				655.898
A0A0J7KZ52	Alpha-tocopherol transfer	10383.7		27684.7	7947.3	11290.5	14863.7	28276.3	9328.89	17835.3	2517.23	12593.6	13816.6	10997.1	18527	15870.6	12541.2	33720.8	6442.21	20176.5	17263.6		15704	8617.85	11573	31996.3	18822.4	28583.5				7800.48	9452.37			19596.6	19885.2
A0A0J7KZ57	Spermidine synthase	8756.58		4832.42			4745.38	742.328	4369.6			1997.64	9682.17	4568.92	4113.44	4640.12		3605.68	4944.17	2352.47	2349.27	8333.51	3727.82	4969.67		3827.47	6679.9	4434.84	2109.45			5988.19	3709.72			2248.97	3853.44
A0A0J7KZ62	Very low-density lipoprotein receptor (Fragment)			458.191			676.271				1535.03		2917.04		381.548				771.688					457.164					1801.18			1002.23
A0A0J7KZ72	Eukaryotic translation initiation factor 6-like protein (Fragment)			2183.22			310.679												431.352
A0A0J7KZ76	Annexin	8735.25	5749.52	2276.89	1958.87	7905.92	7392.54	2804.72	9007.36	3511.86	2929.93	8121.73	10543.7	3772	14280.7	4057.74	6489.29	10732.8	8993.67	7170.47	8714.2	21659.4	14018	11134.9	8413.94	10374.7	14855.3	9279.09	6354.78	7061.88	11114	10159.8	2584.15			13632.2	4399.64
A0A0J7KZ77	Osiris 16-like protein										2206.4
A0A0J7KZ81	DUF3421 domain-containing protein		2265.2			1999.38	1826.83				10805.9		319.461			917.649													18545	19587.7				6897.14
A0A0J7KZ83	Necap-like protein	6667.41	6367.07	2283.93	2519.72	1458.68	7065.71	1049.88		1300.16	10065.9	5210.25	10374.7	5495.14	9014.42	4981.96	1626.63	3699.74	6864.45	5133.4	3624.14	6293.09	8740.61	3601.82	2364.45	3855.46	4176.79	4963.73	18016.8	5500.17		13331.5	1973.55	6949.78		5153.69	5828.74
A0A0J7KZ88	Signal recognition particle subunit SRP72	1207.69		1581.83			795.98	432.384		585.162	975.191	1378.7	1823.2	1211.43	1336.77	1919.83		1567.64	1223.81	626.256		3878.23	1202.63	387.092		2133.03	1521.28	1055.65	595.6			1022.13	1348.64			495.978
A0A0J7KZ92	Beta-galactosidase	1626.04	5122.76	907.916	7414.87	17702.3	4566.66	1776.35	10888.7	1064.33	333255	1454.55	16116.8	10490.9	2624.4	16046.3	1576.93	1692.71	3498.64	47394.2	31396.9	29885.2	7856.27		3408.06	2347.49	25540.8	6212.43	10487.7	8464.71		21883.4	3068.87	4335.69		3289.05	8771.43
A0A0J7KZ94	E3 ubiquitin-protein ligase	1244.65					727.571	252.924		867.88		843.819	1001.47		669.843	783.582																			33814.6
A0A0J7KZ99	Lysosomal pro-x carboxypeptidase-like protein	4539.35		3237.21			2624.3	1099.37		782.862	837.112	1912.28	3818.79	1278.7	4274.94	2701.92		5211.09	3145.31	1255.92	1327.31	3465.51	1969.81	1963.08			1875.91	1891.34				4822.65	3984.55			1552.9	2518.87
A0A0J7KZA4	Titin-like isoform x1 protein	213601	22375.6	235479	9898.54	7413.66	188928	179986	114786	217013	30489.9	288138	147313	84188.9	192089	43360.7	25982.8	166808	201641	139603	41587.6	18326.7	222507	101805	33829.1	95111.4	37976.8	203715	9078.78		56708.9	70853.9	276570	21781.7		141841	75066
A0A0J7KZB0	C3 and pzp-like alpha-2-macroglobulin domain-containing protein 8 protein	14169.3	2695.39	6243.05		1421.95	17843.4	6718.62	6429.68	5274.83	5231.22	12091.3	22292.1	9042.49	39443.3	7955.63	3017.53	8257.19	15273.8	3896.27	7363.59	33727	52704.7	21211.3		11868.9	16102.4	16147.5	7518.45		21806.4	25012.8	9411.84			32451.7	6910.56
A0A0J7KZB1	Carnitine O-palmitoyltransferase (Fragment)	1669.96		934.872			931.235	1305.48		1055.55	1204.56	1127.38	1544.97		1113.95				1560.27			1749.97	1800.33					1279.71	1393.52					1906.26
A0A0J7KZB5	Zinc finger mynd domain-containing protein 10																						42664.2
A0A0J7KZD6	40S ribosomal protein S15	1310.77	2929.37		2858.97	1906.98	1097.03			1355.93		1237.69			944.911				1777.97						7090.89			1171.33	1699.38				3977.44	1156.77
A0A0J7KZD8	Eukaryotic translation initiation factor 2-alpha kinase 4	9147.52		26275.3	13337	20531.3	16933.3	12527.8	21382.3	13596.4	465.486	21466.3	5963.3	11531.9	11218.8	6479.28	30104.6	17979.2	17869	13480.7	30644.8		8604.83	9409.63	18960.9	16525	9934.85	10656.9				13540.8	11248.3			6751.69	7234.59
A0A0J7KZD9	Phosphoglucomutase (alpha-D-glucose-1,6-bisphosphate-dependent)	17468.8	6726.5	11340.7	12289.5	13745.8	19655.9	6244.37	30638.4	4975.59	38775.6	14684.5	22155.8	18179.8	18937.8	11925.5	19166.9	20492	14077.8	33745.8	25440.6	29119.7	28101.3	12721.3	19134.2	24777.1	16590.8	18180.5	17693	2686.18	24199	16478.4	6965.73	3582.73		13197.3	15490.7
A0A0J7KZE3	Putative coiled-coil domain-containing protein 164	23813.5		39734.3		2699.6	19976.1	26948	9724.52	26223.6	1083.25	25971.5	16972	23552.3	18757.4	23653.6	4071.79	20206.8	22688.9	19973	4842.48	29231.9	22371.3	14796.7	1669.35	22708.6	15427	29379.4			1711.27	19420.3	38515		42993.9	11031.2	15548.2
A0A0J7KZE6	Vacuolar protein sorting-associated protein 35	10347.9	37075.1	7121.12	12292.2	3015.12	6184.35	3905.75		2860.7	4674.4	12940.3	10405	5700.69	7099.63	4590.07	3623.31	7082.47	8890.24	10554.7	1469.38	24881.7	14480.3	7822.78		10571.1	7491.6	7585.11	6571.83		11079.6	10535.3	4964.15	4709.93		3945.79	7632.74
A0A0J7KZF7	Alpha-2-macroglobulin-like protein 1 protein	3752.54		4085.42			2937.04	1634.69		1146.44	3341.7	1823.12	4538.93	1611.27	3048.39	2628.3			4464.98	9749.37	2091.89	5964.28	4551.69	2456.47			3858.8					5971.9	3573.98
A0A0J7KZF9	WD repeat-containing protein on Y chromosome	20038.7		41856.8		11215.2	14721.3	18276	6226.75	22150.5		20124.7	9703.09	14553.6	11060.9	16811.4	2052.64	11815.6	20571.3	8457.15	2706.95		16224	8277.1		12466.5	15029.5	16411.7			12834.2	16949.2	20497.8	5535.75		14707.3	13536.4
A0A0J7KZG3	N-acetylgalactosamine kinase	591.917		2855.26				540.556				945.203	464.91		1283.54				1039.07				1743.48
A0A0J7KZG9	Neuroglian-like protein (Fragment)	1903.77		1128.14			953.016	633.776		731.391		807.218	1284.78	892.308	629.786	1237.86			1403.16				330.999					756.129				2266.77	1484.76
A0A0J7KZH6	Esterase fe4-like protein	11505.7	176437	33670.3	14896.9	41844.1	28253.7	29160.9	55429.5	21113.6	388818	35232.6	21903.1	20713.8	18220.8	22996.3	66798.1	78844.8	17558.5	68142.7	103304	24802.6	28751.1	76244.4	40785.2	32301.7	63631.4	35391.9	151980	248637	30298.2	29083.2	40374.6	107148		98649.3	63865.2
A0A0J7KZI8	Vacuolar proton pump subunit B	24436.6	31128.8	30055.2	11093	15223	28874.5	16383.4	20102.3	16391.7	21074	23660.5	31549.1	24372.3	35703.4	18501	11738.6	23465.2	21170	16702.5	17313.3	33255.2	41020.8	12955.2	20064.9	20643.7	22019.6	28542.4	49215.3	34004.6	27345	33443.8	8514.39	22185.1		17472.1	14720.2
A0A0J7KZJ1	Leucine-rich ppr motif-containing mitochondrial	2179.45		1913.13			3010.12	1775.23	6658.97	571.939	9466.24	1029.12	1675.7		3020.18	744.534		2004.5	1384.7	6469.69	24554.2		1997.7	13919.1				5940.18								978.002
A0A0J7KZK0	5-hydroxytryptamine receptor	2616.43		2615.45			841.982	1773.06		1615.87		1780.42	1017.02	1084.2	1016.21	1381.66			1432.24				661.972				685.667					814.508	2497.5
A0A0J7KZK5	Dynein heavy chain axonemal	45723.5	2375.48	50417.3	5024.81	1849.57	33604.8	42700.5	15268.5	45794.8	3791.77	44850.5	38927.5	47721.1	43751.6	59363.7	6880.31	33653.2	39776.1	32582.4	5098.78		42915.7	35253	2993.59	39367	42512.6	46064.8	5169.28	28647.2	36276.9	40465.8	39185.2		70318.3	39450.5	57137.6
A0A0J7KZK8	Guanine nucleotide-binding protein g subunit alpha-like protein	10267.2	11861.9	1564.28	50284.1	37591	11642.1	9784.14	29359.4	9187.54	25021.6	11171.3	9336.41	10964.5	10370.6	13355.5	14125.4	32725.9	4124.33	29517.2	42492.8	3559.52	15091.3	14109.1	45122.8	28247.5	19409.3	21549	27367.9	22275.9	27317.7	7165.86	1790.93	30861.8		17413.4	28902
A0A0J7KZL0	Paraplegin	1458.65		3546.28			925.66	1632.72	5152.01	1599.09		970.978	1503.5	1162.56	779.431	1790.69			1181.87				1577.22				1282.19	1392.11				1872.56	3309.55
A0A0J7KZL2	Nascent polypeptide-associated complex subunit alpha	2063.25	1113.63	2796.59			1816.3	626.341		383.987		824.503	2544.61	1064.19	879.391	972.489		994.174	1635.49	598.125	612.683		1585.03				626.533	1427.81	1620.13			3150.81	1232.01
A0A0J7KZL8	Sparc isoformx2	716.804		540.469			490.47	329.895			5004.08	781.747	1040.77		570.209				523.496					391.813									628.8
A0A0J7KZM2	Ubiquitin-like modifier-activating enzyme 5	1417.69		6227.88			2634.98	942.74		1857.71		1731.25	2894		1308.73				3845.23				768.673	2465.7				1428.79				1296.76	2538.7
A0A0J7KZM6	Large proline-rich protein bat2	726.505	1433.74	549.936			863.676	444.526		378.608	2717.55	1022.71	900.728	623.888	937.118	1138.47			614.792	1637.24	675.608	2097.9	1280.78			1596.55		503.028	3228.13
A0A0J7KZN5	Cytosol aminopeptidase	25106.4	165613	30282.6	16606.9	20115.4	58488.5	33576.5	46554.7	17655.6	352604	27510.8	42429.4	16920.1	38375.8	16266.5	20633.1	54287.3	33383.3	52480.7	64809	24628.2	29158.4	57501.7	19926.8	16792.8	36359.1	29275	45401	54269.5	19676.6	41964.6	9958.2	17338.1		28972.2	29649.8
A0A0J7KZP3	Mitogen-activated protein kinase kinase kinase 15	1283.71					1161.55					1316.91	1492.17	971.935	1254.39	544.12			1775.03				2963.64				479.856	1006.67				1479.67				828.946
A0A0J7KZQ0	Fam151b protein	4847	30424	6604.93	6544.68	31667.8	7938.49	6191.47	19255.5	4732.8	47637.3	4190.1	5445.12	6720.19	4820.71	6347.24	10861	6940.89	5519.38	26962.3	29210.3	9240.42	4877.13	4873.16	12760.3	4382.12	7964.75	4318.75	11805.5	20796.6		20962.7	10633.6	8031.7		8422.74	9436.3
A0A0J7KZQ2	Tripeptidyl-peptidase 2	2377.18		3741.99			1329.33	628.44		1143.38	1149.21	2197.49	2912.12	2456.37	2880.67	1188.03		1756.76	3176	2438.92			2274.98	2726.8		11118.1	2634.49	1654.16	2482.36			1800.55
A0A0J7KZQ4	Acylaminoacyl-peptidase	14932.9	13411.4	16989.2	37764	43851	24222.4	15826	48162.4	16113.4	29968.3	22780.4	21458.6	26919.8	25658.4	22376.1	42221	53158.5	12089.6	48545.3	89456.9	4794.2	22828.3	31026.7	37282.4	41341.3	39578.9	31790	5461.73	4474.77	33380.4	13821.7	9021.87			47449.3	43443.5
A0A0J7KZQ6	26s protease regulatory subunit s10b	20207.3	11429.6	40409	54379	51176.4	24379.4	24339.3	61242.4	36253.6	4483.93	34621.5	19824	18442	22794.1	25380.7	44159.6	36982.9	23057.4	38780.6	63393.7	20567.9	19949.1	9333.22	49254.3	31994.1	18536.1	24604.5	2214.63	4686.13	28565.3	24390.8	14129.8			9521.51	17875.1
A0A0J7KZQ9	Acetyl-CoA hydrolase	933564	66276.3	1209580	48549.2	48293.5	956951	917713	347258	1222540	56856.5	1131310	468398	541284	806331	477834	90723.6	870467	1002810	601822	128851	48183	969265	410386	76649.4	625100	414907	1017560	12276.3	16469.3	107741	361787	1497440	76917.5	3813520	257650	723258
A0A0J7KZR1	Rna-binding protein lark	5154.21	1903.93	2426.94			3228.01	858.429		751.229	1481.68	4277.68	4239.88	2047.39	3097.4	1525.24		2738.84	3940.4			3349.67	4223.11	2752.7			3921.68	2757.38				3868.79	5243.5
A0A0J7KZR5	Acyl carrier protein	42577.7	4434.48	24447.8	2697.82	2413	55229.2	25511.5	14735.1	53635	17428.2	47238.1	74436.2		20455.7		8533.22	49517.6	26308.7	31697.5	13205.5			11103				61572.3	4193.46	2469.72			63989.4		162853
A0A0J7KZS0	Vacuolar protein sorting-associated protein 13b (Fragment)	5756.92		5661.6	1757.67	1488.68	4011.84	7942.28		7293.85		6197.56	4723.64	5232.71	5657.57	7411.28		4065.87	5413.92	6109.42	1861.43		5385.69	5214.42		7837.99	3762.52	6221.92				5743.97	12575.7			2679.7	7503.76
A0A0J7KZS4	Sarcosine mitochondrial	24955.1		45003.6	56845.3		29802.4	44711.3	10533.8	32345.3	9395.46	35031.1	27455.2	12771	21750.2	17299	1880.96	22645.2	28737.4	20728	4157.65		30663	14305.2		20323.6	14018.8	38146.2				24706.2	38523			11301.3	23708.1
A0A0J7KZS5	Hymenoptaecin		14459.7
A0A0J7KZT0	Serrate RNA effector molecule homolog	512.541		542.089				152.33			1479.13				391.908				429.859
A0A0J7KZU0	Transferrin	313375	1103030	1641110	314835	606722	1876460	946605	2233140	545964	4302820	903796	2344740	794178	2296580	642549	270969	1953190	1081590	5631040	4174140	380061	935744	2876300	415727	858881	562718	2105410	437488	500942	920795	1485930	1304750	163621	1327000	669846	806777
A0A0J7KZU6	Putative nuclear transport factor 2	1851.91			7767.88	13878.1	4451.46		2827.03	721.042		4088.35	2521.31	5126.29	4892.89	2979.32	9921.33	15018	1654.41	11179.9	19798.2	5520.21	4485.78	3784.05	6703.34	11475.2	9631.2	8365.27				7748.29	5429.54			15867.7	6775.61
A0A0J7KZV4	Tropomyosin-isoforms 9a a b	21053.3	9473.05	6775.67	3664.35	10493.5	20718.1	3835.23		4124.68	20004.3	19562.6	19984.7	2376.13	7400	3686.58	8774.07	9986.22	24323.1	10804.3	3598	11103.1	6366.68	4917.34	5593.31	14728.6	5979.27	18602.7	52884	46844.7	16932.4	10945.6	9658.89	9237.67	94335.8	4125.03	6512.22
A0A0J7KZV5	Glycogenin-1-like isoform x3 protein	13147.5	16893.3	6478.94	6295.07	4646.05	10226.8	1908.29	17228.1	1309.49	152004	4779.78	12645.8	9741.57	6710.28	9331	14229.6	4130.85	10995.9	8871.75	10611.5	9732.61	5279.89	9221.17	12126.6	3976.53	5214.47	5004.13	46544.1	28238.8	14673.2	13019.4	3559.45	7804.78		6878.77	4942.8
A0A0J7KZW0	Proclotting enzyme	3495.07	3582.7	6329.88			3392.53	3035.38	3735.64	821.188	3082.45	3545.04	3821.96	2774.92	4107.14	1355.14		4211.73	6142.12	2387.77	1389.63		11677.1	2686.36			2527.3	3785.03				14648	3601.76			781.158
A0A0J7KZY4	Microtubule-associated protein futsch-like isoform x11 protein	734.555		1140.21			866.232	240.279			1892.43	1074.57	1312.31	1537.61	834.429	542.365			951.81				1086.13				1185.94	753.39	876.984			1160.7	1182.88
A0A0J7KZY9	Coiled-coil domain-containing protein 56-like protein	373.495						403.121		283.852		256.315		358.439	241.523
A0A0J7KZZ0	KIF-binding protein	403.621		1561.14			360.642	190.362				774.349	789.226		575.986				407.752		358.845							567.811					296.616
A0A0J7KZZ1	S-adenosylmethionine synthase							36.7326					194.359						226.838
A0A0J7KZZ2	Proteasome subunit alpha type	30526.3	3224.34	22122.3	106682	99495.6	59717.7	50139.2	76664.7	47120.9	92917.4	35642	48939.8	47350.1	64065.5	76995.8	54404.8	112840	21168.3	86698.4	127758	29425.7	62703.8	28049.4	89161.1	91713.7	55163.9	75184.7	7239.42	3038.97	86817	36637.8	18384.3		187754	53683.9	79975.9
A0A0J7KZZ5	Peptidyl-prolyl cis-trans isomerase	57953.9	28766.4	52181.9	45359.5	68878.3	117842	112949	108096	84921.1	16913.3	106863	115037	73897.7	154603	39696	64703.7	82727.2	56658.2	167844	149877	18867.3	211142	99618.4	79799.4	95858.9	63534.7	111948	27427.6	14050.7	115966	46068.2	64283.4	10939.3	1387920	61049.4	36345.5
A0A0J7L003	Exocyst complex component 5	1147.82		853.097			537.997	581.637		697.839		1491.3	1250.65	464.954	894.373	833.915			1206.35				1006.5	273.308			514.177									3693.73
A0A0J7L004	Retinol dehydrogenase 14			1984.11			711.853	274.231											401.436														1531.35
A0A0J7L016	Leukocyte elastase inhibitor	3861.59	45825	3769.48	6643.71	4722.63	4261.43	4400.56	5513.78		59239.7	5550.6	7736.37	2462.95	6384.31	6178.41	25546	8225.46	5777.36	18399.3	10122.2	32853.5	7797.95	3391.77	12732.3	8212.31	8155.17	7805.23	45050.9	41969		17495.8	3711.25	17570.4		4289.11	12861.1
A0A0J7L019	Cullin-3-like isoform x1 protein	3872.9	2332.92	5889.61	7799.47	12189.5	4213.52	3674.2	13278.9	6534.39		9661.14	2455.39	3487.17	3515.46	4033.49	14248.5	6946.03	4821.08	8486.75	11007.1		3614.33	4980.1	13765.4	6153.6	4489.22	4160.47				3816.36	11648.9			8790.92	2318.29
A0A0J7L023	Trafficking protein particle complex subunit 11																255818
A0A0J7L031	Putative threonine-rich gpi-anchored glyco isoform x1	997.161										1019.19	722.638	589.236	347.43				629.832				613.134									317.241	744.988
A0A0J7L034	Probable methylmalonate-semialdehyde dehydrogenase [acylating], mitochondrial	3457.58	23493.3	3631.65			4036.01	1523.59		1434.87	22974	3115.68	6704.39	3214.34	5877.31	1808.23	3176.35	3848.82	5211.09	10303.5	5148.95		3986.25	2588.17		3219.21	1148.57	4024.74	2225.04			2627.52	10939.3			6168.79
A0A0J7L036	60s ribosomal protein l11	3777.96		5711.46			3031.9	814.852		522.432	3348.29	2145.05	4477.31	2235.46	2614.37	1098.42		2419.88	4840.72	3433.27	2766.49	5948.64	2652.86	6172.95		3334.19	4154.26	3115.27	1341.75			2584.43	6414.16	549.923		6518.47	857.626
A0A0J7L038	Phage related protein	19795	67536	10277.7	19439.7	37740.6	20581.2	16091.6	59721.7	21360.8	108963	12857.5	25248.7	15564	34751.3	47550.5	15973.3	17951.5	24757.8	109950	58408.4	156037	21846.4	43734.2	26838.9	27985.1	57137.9	31645.8	229182	95789.7	27552.2	233268	28138.5	151680		46597.9	81409.6
A0A0J7L039	Malonyl-mitochondrial-like protein	921.266		4685.28			449.389	893.196		998.509		1019.25	331.22		492.147				1592.63									932.971				341.241	4068
A0A0J7L048	Nitric-oxide synthase (NADPH)	1827.86				2376.58	1399.87	1056.31		1672.93		1031.1	1395.64	1265.86	3939.67	3547.37		1158.8	1571.09	3049.87		3736.8		6864.39		3202.67	6239.81	1448.39				14812.5				2785.35
A0A0J7L055	Glycerol-3-phosphate mitochondrial-like isoform 1 protein	1788.77																	888.878
A0A0J7L058	NADH dehydrogenase [ubiquinone] flavoprotein 1, mitochondrial	19947.8		29332.2		1411.33	16222.7	22758.1	6923	23427.7	1824.65	20715.9	19097.1	17951.2	15558.7	21212.6		14622.6	18804.7	12417.5	4566.07	2155	20758	21796.3	2058.25	15560.8	14650.5	17584	2371.04			17410.5	17492.5			9837.16	18661.2
A0A0J7L061	Serine threonine-protein phosphatase 2b catalytic subunit 2	19338.7		13904.2		3082.8	10415.3	19732.6	8604.34	19984.7		10658.9	10612.5	16446.5	10883.9	21455	4074.11	7594.43	15420.9	8474.52	4924.36	9718.52	13176	19551.6	2729.75	10641.4	14692.1	11817.9	2289.71			16067.4	14508.7			16500.7	11129.7
A0A0J7L064	Serine threonine-protein phosphatase 4 regulatory subunit 3-like protein	131.776		387.83								203.807							183.674														268.801
A0A0J7L065	Domon domain-containing protein	425.219		447.867			184.28	77.3919				454.764	315.511	180.903	315.238				302.007				470.878									855.825	743.517
A0A0J7L067	5-oxoprolinase-like isoform x3 protein	1515.71		8660.44	3492.69	3700.86	1323.48	1351.68	6001.42	1211.11		2541.7	1320.68	1186.3	1181.88		4642.37	3569.37	1529.83	5102.81	3708.02		3467.32	1123.35	7196.54	7406.81	3133.2	2112.54					2743.24			3294.26
A0A0J7L070	10 kDa heat shock protein, mitochondrial	4854.04	14404.2	18960.4		2431.51	4826.83	2230.56		3037.53	15699.8	4180.34	3445.04	1700.2	4514.92	1750.46	3997.82	2273.87	6318.4	11719.6	3218.87		3838.66	6017.55	8668.4	10629.5	3527.06	3398.07	3553.44			4742.3	4789.29	3602.02		11749.9	4297.23
A0A0J7L080	Ov-16 antigen-like protein	105651	26700.7	261589	28337.8	47629.4	198820	148555	222395	153329	45260.3	166731	74406.1	60464.1	67085.3	71728.4	74554.4	76924.8	161381	69734.3	104863	55836.8	70536.4	63504	58586.4	74330.3	78281.9	129648	29979.7	95047.7	119926	129540	331059	76345.4	351442	50634.1	56733.9
A0A0J7L083	T-complex protein 1 subunit delta	11919.2	11091.6	6612.98	34957.9	37992.5	10843.1	7834	14867.2	10211.9	3639.75	14229.7	6937.03	7242.21	13314	12837.5	24354.6	30350.2	10476	28716.6	43056.4	10169.7	8442.98	10744.2	25967.2	16893.3	9764.17	21330.5	4712.99		21587.3	17104.2	32143.6			30296	17847
A0A0J7L085	Apoptosis-inducing factor mitochondrial	67635.4	12461.7	98484.5	13666	5885.85	64260.5	76929.7	25954.4	74720.2	2032.51	73912.1	58982.4	86844.4	61433.8	78146	13667.7	48129	58162.6	54468.5	21430.7		54139.8	55641.2	13461.3	67373.6	68343	69806.3	2481.72	6183.49	37805.9	70676	70860.2	34038	49339.1	76339.3	80050
A0A0J7L095	U6 snrna-associated sm-like protein lsm4-like protein			1194.71															265.833
A0A0J7L0A9	Retinoblastoma-like protein 1 protein	1004.74										1488.12	988.903		411.434				663.771				1226.15										1517.21
A0A0J7L0B0	Virion structural protein	2351.46	1540.99	8807.73	716.104	1132.36	6115.4	3265.16		1046.24	20027	3777.97	9845.1	5916.27	3464.11	8376.04	3356.33	4273.31	4031.61	2428.4	2871.65		10873.8	1896.55	1232.13	3730.73	11179.5	10431.8	30367.3	1686.97		7756.54	9614.67	3296.45		3209.73	18295.7
A0A0J7L0B8	Angiotensin-converting enzyme	25867		17899.1	3739.93	9461.79	17214.9	24716.4	22747.9	4254.72	89210.2	3556.26	13981.4	13679.3	12860.6	19721.4	5218.45	11428.3	6949.24	47143.9	12944	25067.6	15273.6	27231.9	4488.66	9468.29	119021	15499.5	2846.2	8811.02	50068.6	44429	10419.3			37547	7559.59
A0A0J7L0B9	Transketolase-like protein 2-like isoform 2 protein	86344.1	18230.3	52758.8	9399.67	6481.27	48401.9	22943.9	40773.6	10870.3	82959.9	82934.7	149216	73904.4	124505	52598.4	14882	39471.8	88129.4	36626.5	26271.4	24124.2	225654	104119	11785	54277.8	91260.8	32386.5	29465	8781.33	60630.4	74280.3	31374.2	3862.82		55921.3	37116.8
A0A0J7L0C5	Ribosome biogenesis regulatory protein homolog (Fragment)	13530.5	3419.72	10341.5			5723.61	4206.67	6546.69	1496.91	2574.43	5357.24	7325.74	4857.03	8022.36	4009.75		3594.02	7333.48	7572.35	1274.11	10250.6	5661.98	2947.16		5074.32	2950.03	29358.1	4303.56			5223.48	6281.34			17078.4
A0A0J7L0C6	Proteasome subunit alpha type	11134.5	1409.14	3799.92	15007.8	15302	15944.3	7015.63	20301.4	9911.33	23709.8	11870.8	7951.77	10079.9	13378.2	9293.53	19062.5	16062.2	5630.12	9541.18	44772.3	7333.02	9168.32	7708.36	13543	16669.1	12487.6	16924.1	1779.72		11466.9	8650.23	10498		31722.5	15084	12694
A0A0J7L0C8	60S ribosomal protein L30	3379.42		6410.28			2335.06	1081.38		1002.55		2050.33	1004.14		1870.49	2875.4			4907.47				2688.25	885.421				647.261				1973.14	2946.11
A0A0J7L0D0	Zinc finger rna-binding protein	2081.83		792.656			528.679					1532.2	2116.62	2128.41	1634.87			2458.6	1100.56								4640.57					2174.94	1548.5
A0A0J7L0D5	Transmembrane protein 177	1189.11		1286.45			780.683	458.684		124.658		934.462	870.699	1834.39	459.431	1367.66			1495.56									588.76					491.167			971.35
A0A0J7L0E6	Sjoegren syndrome nuclear autoantigen 1-like protein	39606.3		41125.9	3434.53	3688	21456.8	38425.9	9148.76	41678.7		30581.6	18217.3	17790.5	24749.9	27394.7	4456.41	17394.9	24023.2	11414.5	9024.76		12118.7	9214.01	1907.16	15438.8	12078.8	19511.8				18233.2	19002.7			4842.7	9366.9
A0A0J7L0G6	Teneurin-m-like isoform x7 protein		5693.88								56884.1												3475.55						4708.23
A0A0J7L0G7	Protein cdv3-like protein	555.52		322.238			357.377				1514.32		1207.66		910.124					1380.31				812.337												1834.71
A0A0J7L0H2	Adenosylhomocysteinase	860.385	14889.3	5223.1	13974.9	3365.64	2182.86	547.643		716.875	3863.71	1502.23	1855.3	3566.32	1529.19	881.878		3974.96	1327.08		2516.27	13992.4	3879.24	3005.57	5436.89	4225.57	2339.08	3348.87	11612.4	9192.66		821.647	1468.86	37131.4		4041.68
A0A0J7L0H7	Dihydrolipoyllysine-residue succinyltransferase component of 2-oxoglutarate dehydrogenase complex, mitochondrial	198036	4769.14	145057	2563.4	2911.23	102620	116774	32389.8	160130	2509.58	136070	127939	111669	124203	94991.3	11431.9	78431.4	132905	71560.2	19953.9	11807.5	106400	36148	4577.87	89418.2	67073.3	116255	4238.93		18800.6	184700	112349	3378.01	139240	28113.2	79181.5
A0A0J7L0I3	Aquaporin-like isoform x4 protein	6963.44		8514.92	11398.5	53136.3	10369.7	11019.1	36828.6	4679.04		15002.3	7027.42	10987.2	3986.55	12233.7	19636	31659.4	8584.25	30018.2	16807.8		21262.5	11299	55543.9	24695.4	14130.1	14996.7			7186	12967.1	2653.87			52246.5	17079.7
A0A0J7L0I5	Ap-3 complex subunit mu-1	3231.87		1571.89			1684.28	1804.69				4252.86	3873.29		2912.83				2064.38								8700.12	8926.3
A0A0J7L0J6	Proteasome endopeptidase complex	70011.5	8130.84	48033.8	161507	139646	81793.2	73908.2	183441	86323.9	137328	104288	89806.7	58289.9	98872.1	51660.7	125974	179310	67491.3	167303	263188	18087.4	86539.4	53042.5	147829	176755	87665.8	106037	12015.1		80515.5	139576	34681.1			102709	97780.1
A0A0J7L0K1	Guanine nucleotide-binding protein subunit beta-like protein	14434.3		15299.7			22709.6	12671.5		6807.12	62137.7	23732.1	19017.3	8717.62	20893.9	4708.65		11548.6	18708.9	4096.59	5526.6	18648.5	30169.7	23802.2		5656.47	23979.3	7679.01	4255.34		21596	1986.12	10658.5			16936.3	13137.4
A0A0J7L0K7	Coronin	742.961		949.874			184.362	219.939		348.2		349.162	795.213	522.401	395.766				513.506				1554.91					522.016	1616.95				552.433
A0A0J7L0L4	Piwi-like protein 1-like protein (Fragment)	2016.79		6380.91	3439.08	2691.6	2430.91	3267.56		2782.5		4069.83	2348.96	3384.27	2107.41	7578.65	5725.77	3080.54	1506.62	5129.21	3051.91		2938.61	1643.12	2907.96	5057.37	4475.68	3117.27			5310.7	3284.91	3351.11
A0A0J7L0M2	Protein singed			503.514			316.798	62.1023		161.369		381.286							204.808
A0A0J7L0M7	Gtp-binding protein 10-like protein	931.582		3171.76			1056.2	1541.19		1249.71		2958.15	790.068	762.647	1869.87	1515.38			1213.01									1611.9					6587.76
A0A0J7L0M8	Filamin-a-like isoform x1 protein (Fragment)	1199.53		1851.07			1024.75	782.765		707.674	752.019	1089.78	1248.12	385.142	1146.72	990.323			1789.6			1841.47	986.009				2240.26	1951.27				1670.9	2373.81			3638.23
A0A0J7L0P7	Phosphopyruvate hydratase	340719	13060.8	549023	64873.1	69343.5	323409	491061	176135	468635	11235	382643	272198	329104	278867	393807	110642	347935	286048	195666	150613	5539.06	225505	309376	84578.3	258540	266496	314823	2156.36		83298.4	326022	645536	22337.6	819106	264885	226644
A0A0J7L0P8	Afadin-like isoform x10 protein			1576.38				415.766		594.083		1466.67	1307.15		1117.24	1378.03			1034.86			1147	1015.21					1585.12				1513.7
A0A0J7L0Q8	60 kDa heat shock mitochondrial	13135.2	16797.2	3803.96	7322.84	6096.96	6092.64	4560.9		4476.91	28599.3	4444.96	10432.8	5325.57	6838.91	6190.3	12473.3	3501.56	8592.92	10081.9	4107.3	10413.9	4757.81	8053.77	4573.29	24489.2	7660.39	8139.28	6258.55	5911.8		11547.1	10221.5	5827.9		18192	19661.6
A0A0J7L0R0	Cell wall protein iff6-like protein	1098.24	3940.11	1672.52			1533.73	748.212		589.203	20158.1	1753.97	3538.99	1895.24	3447.51	2477.07		1838.39	1741.54		1639.35		5704.41	6636.45			3105.1	3871.9	13376.9			4934.01				11256.5
A0A0J7L0R4	Transforming acidic coiled-coil-containing protein 1	516.887					1127.7	466.541				766.327	1670.24	609.722	1088.21	553.798							1724.74	1239.57				1408.22				788.335				2098.02
A0A0J7L0R9	Myosin iiia	324.423		1710.93				1538.58		241.212									171.88														499.923
A0A0J7L0S5	Cuticular protein analogous to peritrophins 3-b		2297.51								8559.42		1532.49						1604.05										1556.15
A0A0J7L0S7	Gamma-glutamylcyclotransferase family protein	4257.29		3650.43		968.62	3197.44	2836.99		1905.07		2232.57	4235.08	2830.18	6022.1	3229.94	1336.05	3043.3	2698.59		2645.24	2630.49	5266.79	3182.46		2458.5	1899.22	3386.12	3723.54			5272.07	9079.27			5042.92
A0A0J7L0T2	Endothelin-converting enzyme 1-like protein	14400.9	4463.63	75728.8		516.025	25625.6	14444.3	25083.9	7669.93	16311.1	17624.4	35692.9	18249.8	32033.6	23091.1	6347.94	21056.8	33157.5	16522	15079.1	8209.94	98793.7	26378.9	1590.97	18896.3	17626.2	31469.3	10933.9		17864.5	31193.6	24057.2		49033	35949.1	19821.3
A0A0J7L0T4	Uncharacterized protein	1552.34		2935.65	1010.49	767.662	1454.19	2015.01		1877.37	2228.43	1566.62	797.855	990.101	504.4	1067.97		1317.56	1472.23	2415	1053.41		551.038		1730.82	1229.81		1981.88				1895.88	3214.48
A0A0J7L0U3	Centrosomal protein	13566.1		14448.2			15542.1	17423		17649.6		18249.9	12296.8	18015.3	15128.1	16416.1		10648.8	13220.4	10650.9	4211.03		14708.5	11549.9		14194	16553.8	15765.5		30644.3		14922.8	12516.6			9530.06	13472.3
A0A0J7L0U6	ATP-dependent Clp protease proteolytic subunit	5098.43		5834.58			3497.31	8314.99		6777.73		2952.14	6652.38	7917.51	3731.81	9919.51		2325.88	4982.82	3590.1	1979.99		4951.64	8929.58		8955.72	3937.58	4417.98				6416.06	2820.43			14056.4
A0A0J7L0W5	Calponin homology domain-containing protein	125493	13951.5	193940	10116.2	7744.54	110109	119271	46363.6	149351	17499.4	164229	91465.4	128938	109316	167668	24482.4	84755.9	116018	82042.5	41696.5		115605	101558	15675.6	89357.7	110103	108574			68209.2	73701.4	124953	9724.99	112106	122729	182654
A0A0J7L0X1	15-hydroxyprostaglandin dehydrogenase	3033.09		1640.21			1300.14	519.875				1311.39	5587.77	1267.71	3982.26	1615.2		1107.08	2769.06		832.923	8964.01	1635.55	2369.22			1321.42					3373.72	3257.14			2410.91	1623.77
A0A0J7L0X2	2-oxoisovalerate dehydrogenase subunit alpha			6875.19				211.211
A0A0J7L0Y1	Leucine-rich repeat-containing protein	2521.22		1601.22	1612.58		2698.46	1787.41		3516.88		1938.42	1203.76	2362.55	1615.01	4163.73		2917.1	1274.09	2128.76	1758.12		1355.7	612.077		4554.99	693.986	2266.93				2731.19	2162.86				1965.46
A0A0J7L0Y2	Radial spoke head 1-like protein	5766.49		10327.2			5701.39	4795.89		4287.34		5622.05	5402.42	6111.04	4304.13	12233.4		4925.98	5734.78	4850.55	3065.98		4285.98	5585.53		5397.55	4775.53	7518.85				5457.91				10438.6	6669.02
A0A0J7L0Y4	Wd repeat-containing protein c10orf79			5860.13			390.79	1041.21		671.857		1177.42	376.515		226.711				924.836				415.861										1460.53
A0A0J7L0Y5	Paxillin	2766.39		3174.63			1946.38	1362.24		1202.88	994.362	2362.59	3071.96	2411.93	3955.17	2097.07		2972.78	2605.87	968.939	639.334		4901.18	460.52		1528.88	2037.27	1765.73	2935.2			2670.42				788.85	2190.39
A0A0J7L0Y9	Dynein assembly factor axonemal-like protein	1397.69		1463.84			609.818	886.936		1175.66		1474.62	1002.15	779.394	1144.48				811.086								982.964					1198.31	1342.77
A0A0J7L103	Cytoplasmic phosphatidylinositol transfer protein 1	1919.68		8815.19	6018.46	8212.64	10169.7	11830.6	29004.6	4915.44	21715.9	9621.84	9545.45	1491.7	3093.86	2133.62	42567.3	7692.63	7831.29	24563.3	19298		4245.6	2086	32747.5	4583.3	4463.7	3312.65	11568.7			8389.09	24964.4			9604.22	20274.6
A0A0J7L107	Gtp-binding protein 128up	35359.7		8811.34			32894.7	26562	9869.14	15436.6	28211.5	15035.4	33796	31026.9	43306.6	28294.6	4859.37	33811.5	16938.9	22461.8	7648.43		46812.6	27389.2		50796.7	50876.6	68926.4			22482.5	20147.2	39674.9			25054.8	47776.9
A0A0J7L110	Ap-2 complex subunit mu-1	2059.58	6185.35	3532.54			1003.94	480.108		315.427	1418.33	2104.48	2026.94	1558.53	1436.86	918.344			2184.86				2218.47	1481.04			2186.13	853.688	1033.26			3004.45	2180.01			4752.7	1226.59
A0A0J7L118	Protein lava lamp	301.595											246.809						252.064
A0A0J7L120	RNA helicase	1525.68		676.117			872.685	506.083				914.803	1524.83		1212.74				744.571			7191.17	1572.74				1079.24	2117.28				1794.86	1451.87
A0A0J7L126	3-chlorobenzoate--dioxygenase oxygenase subunit			3258			3511.97	3396.53				10725.2			4718.19
A0A0J7L128	Tubulin-specific chaperone E	2887.52		4273.54	6092.08	6378.95	3017.97	2435.43	7840.05	4307.71		7167.54	1619.82	1900.01	2447.74	2276.37	11054.6	5058.42	2804.92	8767.92	7429.66		4897.5		11018.9	4818.07	5310.27	4467.94				4185.94	5423.8			7263.19	3780.57
A0A0J7L131	F-box lrr-repeat protein 7	324.53		459.578								484.637	265.387		366.638				383.419
A0A0J7L133	GMP reductase	2985.22		6763.36	1134.06		2687.53	1161.19	4268.08		2096.93	4077.14	3982.93	3393.41	3373.49	2140.8		4563.79	3439.76	3237.39	3837.9	3861.22	3657.57	3267.76			2272.6	4631.56	3315.51			2567.68	3137.52			2584.82
A0A0J7L134	Pyrroline-5-carboxylate reductase	1803.12		3082.69			2411.62	3423.26		874.822		2007.37	2881.47	2481.24	4160.4	711.146			4402.15				11564.6	1457.36			2350.63	1200.86				1300.89				1543.37
A0A0J7L139	26s protease regulatory subunit 4	17795.7	8043.34	13262.5	61955.7	62314.2	22760.4	21022.9	68854.6	27742.1	4656.97	25431.9	18241.1	19339.6	21157.3	33420.2	54248.2	57185.3	12112.1	51327.6	106983	7637.55	20609	15656.3	51441.7	48771.3	28762.1	32332.2	5565.3	4089.43	28631.4	26630.6	15292	3339.24		28864.3	40635.9
A0A0J7L152	Protein LZIC						460.884						1171.32		551.741	432.112					1416.95		1401.06									1476.56
A0A0J7L159	Putative threonine-rich gpi-anchored glyco	53664.2		1185.68			30793	31971.1		24934.5	3078.82	27257.9	17656.8	7869.46	51310.4	4477.29	17728.2	16340.8	16290.5	24053.4			57500.2	56265.6	4370.02	15021.8	44140.6	46482.4	1848.01			16243.4	34237.2	8017		7681.54	18793.8
A0A0J7L167	Glutamine--tRNA ligase	2738.41		1939.28			1757.41	611.274			2068.58	1058.8	3495.65	2321.42	3410.42	2252.9		1166.29	1541.5	2114.95	1586.66	12906.5	1717.84	1935.4		2309.32	2480.1	1482.58		1830.66		1260.44	1501.23			3038.25
A0A0J7L177	Splicing regulatory glutamine lysine-rich protein 1-like protein	2686.75					2028.19	2426.51		4266.97		2583.73	1908.19	1983.29	1149.72	2314.18		1239.13	2486.28	2046.25			3232.09			3155.02	1971.15	2083.67				1840.57	3118.05				2151.52
A0A0J7L178	Fas-associated factor 2-b-like protein	3599.93		1191.67	1736.18	1486.87	898.627	1207.35		2715.18		10075	625.894	959.152	1417.71	4672.13		1337.77	679.913	3229.9	3419.31		3415.94	1625.75	2074.78	2203.39	1655.32	1609.75								2948.48
A0A0J7L180	Ubiquitin-40s ribosomal protein s27a-like protein	118839	84281.2	68622.5	172542	196269	163579	115354	232316	190282	56566.5	163942	62653.8	36030.4	69646.2	100567	254425	183386	85079.7	178579	239437	51721	131682	44886.3	349747	150924	95354.4	145327	58046.4	45818.4	133455	46092.3	173019	53451	140942	67724.3	53801.6
A0A0J7L187	Rho gdp-dissociation inhibitor 2 isoform x1	10336.6		10152.7	7810.54	11026.9	13598.7	9568.16	13462.5	8811.52	2569.21	8843.11	11907.7	9634.81	13467.4	15817.1	13453.7	8604.03	6145.58	14639.6	29306.6	5403.52	14464.8	7777.48	13701.1	12243.5	7947.67	11318.9	4779.81	3523.13	11785	7410.21	4263.13			9948.63	8669.78
A0A0J7L192;A0A0J7NV28	Gc-rich sequence dna-binding factor 1-like protein (Fragment)	1364.86		6272.92		4326.48	4423.16	5063.05	15932	2100.86	20808	3515.61	8830.12	5398.64	10468.1	6916.45		4934.65	4674.83	12409.2	10538.4	8692.51	18646.3	7541.46	1736.7	5977.34	4314.95	6428.69	2469.95	5279.6		18022.9	3987.07			3510.72	20060.5
A0A0J7L1B1	Acetyl-coenzyme a synthetase	2492.6	8920.07	8581.7			1618.13	1138.78		3934.33	8055.08	3675.37	2633.67	5728.32	1615.24	1021.56			2907.46	10162.4	4136.24	21727.2	986.795	865.223	3133.28	1945.64		1474.23	7635.15			1422.76	3606.66	4903.47
A0A0J7L1B2	15-hydroxyprostaglandin dehydrogenase	280.182		336.084
A0A0J7L1B5	Aminopeptidase n						882.169		3489.75			904.32	1686.78	1029.6	875.288	932.795			1012.79	2633.13			3044.24	836.705			1116.49	1013.26				5297.11	1338.81
A0A0J7L1B7	Protein efr3-like protein cmp44e protein (Fragment)	1671.63	5394.89		72696.5	3079.84	3173.68				5728.98		23806.7				51268.9		861.675	3704.6			1401.46		32204.7		1751.82	27222.5				2457.43
A0A0J7L1B8	Synaptic vesicle membrane protein vat-1-like protein	4725.62	1505.45	14480.4	5796.9	3473.82	6239.61	2752.55	5916.98	5679.07	2644.79	5293.45	6320.17	5285.23	6591.55	1733.29	5845.14	4038.96	8976.92	7315.58	3510.75	4285.39	4993.73	6580.39	7848.27	6164.62	5094.12	6384.66	4257.08			4432.91	10823.6	3442.06		6961.19
A0A0J7L1C2	Eukaryotic translation initiation factor 4C	14569.1	8783.76	11256.4	2402.15		11558.4			946.89	32838.2	4074.11	22336.5	11145.7	15464	8306.79		4066.84	7287.73	6699.81	4142.81	3413.19	17993.9	3476.8	2420.14	4136.53	3933.74	6804.36	25409.2	9408.18		12558				3363.71	5023.13
A0A0J7L1C6	Protein 5nuc			386.986			236.631						170.62						330.191
A0A0J7L1D5	T-complex protein 1 subunit zeta	47957.9	16620	36903.9	176373	161410	41308.9	23410.3	92316.3	38450.4	14209.9	53809.4	37237.9	50076.2	55316.2	69153.3	139788	134789	43772.4	142510	184271	56564.7	42446.1	55309.8	142354	81919	60840.9	69566	20983	1463.2	90640.5	76419.9	43546.5	9725.03	327311	111450	96680.1
A0A0J7L1D6	Organic cation transporter					5455.92	1105.67	505.86	3384.69	1031.56	1260.95		1628.8	545.318	1495.7	1726.32			2151.52				1358.26		4508.8		1485.94					3431.83				1901.43
A0A0J7L1D8	40S ribosomal protein S8	3529.98		3400.11			2847.5	718.573		1413.08	1749.27	4980.84	4429.84	1032.88	4316.81				7469.5		490.748		9034.64	1091.15								3132.87
A0A0J7L1E1	DUF4470 domain-containing protein	1592.02		1971.82	3053.26	2110.52	2424.23	2405.79	4651.98	3411.9		2521.65	1161.36		1830.51		3263.13	3744.9	1278.85	2256	3030.78		2379.04	1138.77	2721.28		1486.87	2009.6
A0A0J7L1E2	Syntenin-1-like isoform 2 protein (Fragment)					2007.55	981.361				8219.8																		6229.9	13864.5				4252.2
A0A0J7L1F5	T-complex-associated testis-expressed protein 1	4142.63		23810.6			5096.91	8467.31		6537.74		4773.81	3162.35	2332	2858.72	1103.82			6466.9				2323.57	23332.3			4599.62	4068.85				1862.86	19523.4
A0A0J7L1H0	Reticulon-4-interacting protein mitochondrial-like protein	11131.5		1650.9			13162	7783.59	7866.79	7011.25		5906.14	13055.6	25485.9	12747.1	20353.6		10164.8	3996.86	8906.12	2497.52		12871.4	20078.9	1320.58	18311.9	30873.6	24347.8				6978.41	6663.14			27112.3	23060.8
A0A0J7L1I1	Alpha-sarcomeric	5271.78	31698.1	4488.93		929.57	4170.81	2807.36	2261.79	2453.02	1931.29	6569.71	5472.08	2260.09	6373.11	4765.92		3521.9	5625.38	2026.16	2200.84		8542.79	1064.55		3868.5	4017.82	3173.39	2089.54	3479.25	6331.46	5607.6	5125.38			2317.11	4551.86
A0A0J7L1J1	Xaa-pro dipeptidase (Fragment)	8215.5		30549.1	17285.1	20315.3	13026.9	14651	25570.5	12097.1	7116.44	13138.7	8223.96	6881.01	11006.9	8789.84	21831.9	23567.9	14653.4	21881.2	20099.6	14579.4	16256.2	20630.1	24678.4	16043.7	35544.1	11658.3	7542.86		14619.8	8283.89	12208.7			17271.6	21958
A0A0J7L1J6	Galactokinase-like protein	5745.61		2457.15			5489.6	1505.08	9704.12	783.068	5136.69	3680.87	12834.4	3806.9	9401.18	2475.93		3311.41	4438.1	6034.69	11149.8	19203.8	11275.3	20108.8		2546.02	6274.41	3140.81	5404.45	6396.16		7985.44				4892.37
A0A0J7L1J9	Glucose-6-phosphate isomerase	16904.9	13550	56072.6	21333.7	32832.2	30665.9	20002.8	43579.6	20266.8	90949.7	43487.8	18738.2	15727	21201.1	17443.5	24016.3	45335.5	24714.8	36699.8	37922.6	9615.19	22233.2	25003.7	25846.2	27021.7	24806.7	23951.8	39503.8	23485.6	60728.2	34528.4	52415.4	6021.28	114957	47849.3	45601.4
A0A0J7L1K1	Hsp90 chaperone protein kinase-targeting subunit	842.388		1111.81	1318.61		1073.84	539.005		782.626	1048.87	939.064	1512.84	566.891	1169.91	456.813	1354.01	1884.78	1263.64	2658.54	2637.66	5704.21	1803.5	181.629	1624.83		935.999	1917.16	1181.6			2365.99				361.166
A0A0J7L1K5	F-box lrr-repeat protein 20	1371.38		21172.8	2111.05	2591.62	2190.12	2043.23		1626.83		2363.19	808.326	1717.21	498.497	1825.83		1885.68	1424.95	2145.56	1564.66		6414.78		1836		634.372	1555.63				2447.27	2022.35
A0A0J7L1K6	Leucine-rich repeat-containing protein	4645.41		6234.75			2417.33	5734.07		5272.81		3799.94	4192.19	4589.21	4158.49	7203.49		2645.18	5849.06	4097.37	2903.21		2901.61	1409.14		4046.64	5303.74	3077.14				3441.4	2600.19			1743.93	3665.88
A0A0J7L1K8	Dynein light chain axonemal	19569.2		14341.8			12457.3	20700.4		16524.5		11674	1873.46	2528.5	5832.31			3669.57	12362.6				591.689					6933.76					30012.7
A0A0J7L1L3	Phytanoyl-dioxygenase domain-containing protein 1-like protein	542.053		345.843				159.875					355.706						148.108
A0A0J7L1L7	Aminopeptidase n			912.138			555.844	321.88							670.701				546.694				1460.2	288.315				802.63
A0A0J7L1M0	Transmembrane 9 superfamily member	789.893		751.482			503.482	303.044		681.676					1199.72				1752.63
A0A0J7L1M8	Nucleolin-like	2299.72	6071.59	1255.92		586.074	1822.75	1355.88		1015.85	15123.8	1703.7	2218.14	2644.04	2005.93	1313.97	2203.47	2737.2	1146.94	4895.02	2711.79		1423.72	473.554		2928.39	2757.28	2563.65	6423.65	4742.76				1213.58		2296.46	6239.77
A0A0J7L1N2	Phosphotransferase	34339	5954.73	7145.9		2845.66	30649.9	5261.85	43053.7	7237.75	9585.58	25227.5	74027.5	28040.5	54193.3	29231.2	8700.03	22935.6	41209.7	28662.1	12440.8	46713	51763.1	61648.9		16536.9	40614.1	17605.4	9812.74	16159	52784.7	77952.3	18615.8			40843	25895.8
A0A0J7L1N3	Serine hydroxymethyltransferase	100861	15692	97830.4	7918.08	4230	93264.6	64328.1	75294.6	28312.1	24504.2	57349.5	210383	101012	159764	104391	17807.2	46729.4	112529	68126.8	36134.8	21503.3	93318.5	171405	10731.7	41046.9	118280	54139	17643.9	10521.4	94229.4	102571	76854	17621.9		202016	35400.1
A0A0J7L1P5	Uricase	2173.81		3197.2			354.225	214.921				2544.63	3232.19		448.64	1619.74			1187.41				1707.76	1408.47								1242.83				5624.97
A0A0J7L1P9	Camp-dependent protein kinase catalytic subunit beta	36003.8		57150.6			36823.4	62447.1	12129.6	69982		62861.2	16517.1	21892.9	28534.8	27654.9	4189.03	17568.2	39454.6	22026.2	5472.22		18867.3	8744.51	2018.4	18965.7	18858.3	32904.5				30160.1	61045.3			60395.5	27465.9
A0A0J7L1Q0	NAD-dependent protein deacylase	4548.25		11410.6			4831.56	8873.23	3739.15	6559.78		6274.47	1324.64	923.658	2554.16	1023.69		2499.22	9509.59	915.552	327.323		1086.02	1411.02				6576.25				1976.59	25537			8216.75
A0A0J7L1Q4	Serine arginine-rich splicing factor 4-like isoform x1 protein	1227.8		2136.95			1901.36	1237.09		1533.78		1763.16		1419.52	917.601			699.532	1254.75	2118.35			3322.67				3035.52	1738.22
A0A0J7L1Q7	3',5'-cyclic-GMP phosphodiesterase (Fragment)	2047.21		2451.7	9668.23	13931.8	3385.85	2273.13	14521.5	2428.06		4245.72	1677.33	3228.47	2756.28	3917.25	9981.16	8216.95	2132.57	9688.8	5154.06		5085.52	7734.95	10975.9	11876.7	6898.36	5826.62				2724.37	2573.97			9172.51	4906.82
A0A0J7L1R2	Translin	23668.1		25767.7	53285.3	63917.6	30665.4	16655.7	49945.5	27002.7	2080.54	44444.6	19234.8	28411.4	21706.6	33080.9	60518.3	52399.4	27422.1	62317.4	36913.5	4375.79	26623.9	28438	72478.8	51312.5	60804.6	38389.7			15356	43594.7	19734.6	5487.16	48130.7	47812.5	35661.5
A0A0J7L1S2	Wd repeat-containing protein 60			1139.55			930.529					889.072											1491.17
A0A0J7L1S3	Sperm-associated antigen 17	20178.4		31553.5			17169	20861.6	14562.7	18570.5	3173.68	22213.3	16015.1	20597.2	17917	16196.9	4560.33	20141	21303.1	16245.7	5830.46		18653	13054.2		23949.7	17886.9	21220.9			10605.9	18893.5	41227.2	17463.6	58318.3	10003.6	17386.7
A0A0J7L1T1	Caprin-like protein	356.329		309.724			722.652	182.268				230.151	825.711	395.667	539.147				395.818				1284.07				692.742	1157.64
A0A0J7L1T6	Dynein heavy chain axonemal	7520.68		10653.9			5678.88	6941.54		6680.95		5450.81	4924.34	6491.69	4223.35	8361.48		4865.62	5786.46	4265.87			4226.15	7705.23		4575.39	6384.67	5131.78				5400.86	11429.5			5553.13	5111.71
A0A0J7L1T8	Myeloid differentiation primary response protein 88			879.877				259.044				313.153																					281.775
A0A0J7L1U0	Acetyl-mitochondrial	42524.9	6231.77	53872.1	4186.01	4999.75	34341.4	66933.3	16500.3	56791.6	4210.22	41317.4	40889.5	31318.8	26560.2	34114.5	7659.58	25102.1	39069.3	33161.1	14811.9	16759.4	43119.1	17040.7	5097.04	40825	29383.6	48686.8	5577.65	5252.41	31598	41033.6	64996.5	5893.6	47332.7	15212.9	38017.2
A0A0J7L1U2	Tyrosine kinase receptor cad96ca										4622.75																		1989.48
A0A0J7L1U7	Calcium calmodulin-dependent protein kinase type 1 (Fragment)			1688.71			609.002						543.591		600.603				945.737									601.063	943.11
A0A0J7L1V1	Iq and aaa domain-containing protein 1-like protein	16145.9		32431			13121.7	13268.3	8027.13	14499.1	688.02	13306.3	9731.92	13269.6	11345.5	15610.6	1378.56	7622.5	11307.2	7191.35	2361.18		9794.89	5406.88		10016.6	5303.59	10280.9				15659.7	19599.9		32913.7	6320.19	11134.8
A0A0J7L1V5	Unc-112-like protein	2741.63		2274.16			1964.18	871.506				2424.56	3649.36	1651.66	3777.91	2705.2		2431.25	2921.15				2968.98	2241.33			3885.22	2553.93				1690.5	1231.82			2797.58
A0A0J7L1V9	Short-chain specific acyl-mitochondrial-like protein	10943.6	22454.1	11387.2		2665.55	8198.81	4727.38	5841.01	2003.83	77977.1	6624.99	15445.1	2895.38	9564.41	2393.76	768.618	6069.79	14973.5	4348.36	1752.22	2148.54	13221.3	3519.77	3853.12	2384.98	2251.84	4811.96	3526.29	2151.75		6550.86	4405.22			3826.01
A0A0J7L1W2	Zf-ISL3 domain-containing protein	103364		101240			54868.8	85705.2	40304.7	114044		138524	57285.9	30068.5	58528	70078.3	9891.51	53080.6	135610	39267.6	13038.1		72527.8	20717.3	4627.79	73257	38901.1	86980.6				25987.6	186249	2530.93		8207.03	54162.5
A0A0J7L1W4	Cop9 signalosome complex subunit 7	941.645				3170.9	1671.32	547.069		398.434	4365.45		1652.46		2537.71			2201.65	461.689	4149.32	2540.56	2429.86	1909.27		2618.6	3383.73	1255.73	1687.31	13318.9				811.513	69122.1		4189.31
A0A0J7L1W8	Low-density lipoprotein receptor-related protein 2	1717.9		1891.49			1268.08	932.805		910.091	1115.88	1318.67	4186.1	1579.61	1472.92	1462.74		2320.62	2079.82	2377.48	1967.15	1848.31	2276.71	1103.81		5617.8	2166.31	1541.98	12041.3			2857.53	2285.16	30039.9		2195.58	3379.49
A0A0J7L1X5	Solute carrier family 25 member 42-like protein	918.687		2726.32			918.754	2095.94		1157.51		837.469	1113.07		2208.92	955.164			1066.49				1473.1					1164.64					992.63
A0A0J7L1Z5	Sec23-interacting protein	2741.28		1226.93			1254.46	683.739		655.175		1757.95	4208.47	2437.98	2372.81	2302.6		2495.66	2353.96		749.426		5306.19	1166.36		3216.65	1115.11	797.9				2418.25				2021.38
A0A0J7L1Z9	Thymosin beta-4 (Fragment)	15163.8	14144.6	12011.7	10592.4	5967.1	19873.2	12979.2	5556.46	5949.5	66471.1	12671.1	30771.6	12740.7	22372.5	12994	15179	7447.31	22891.2	16278.3	16951.3	908.835	32182	8863.62	8856.83	9828.26	12850.2	19833.1	54794.4	22567.9	23802.2	21033.5	13634.1	7601.76		12666.8	9673.46
A0A0J7L204	Uncharacterized protein		6471.54	941.693	1088.12		1626.31	337.42	2829.26		12395.4	378.827	1503.5	1044.13	889.873	403.43	4137.8	1134.08		4631.61	4369.98			1519.87		2285.29			4620.82	2606.48				2350.57		6785.47
A0A0J7L210	Succinate--CoA ligase [ADP/GDP-forming] subunit alpha, mitochondrial	305434	15388.9	362245	6280.66	8757.32	260415	309372	57649	303081	5756.3	259810	182385	157014	212553	152215	23932.8	182968	243580	130798	48827.5		209383	111923	15533.6	128141	74885.4	281641	3992.73		77221	110823	360955	390005		83664.3	87063.4
A0A0J7L211	Solute carrier organic anion transporter family member	1331.47	2215.81							814.198
A0A0J7L217	Sodium/potassium-transporting ATPase subunit alpha	3802.35	4654.28	1607.1	1692.98	3627.76	1671.14	1376.4	4628.79	1909.28	3490.83	1995.54	1436.47	1786.85	1162.22	2757.02		2483.86	3456.5	4421.36		8273.28	2493.76		2552.78		1652.03	1575.86	1194.77		9876.86	7514.6	2586.18		47846.1	1096.41
A0A0J7L219	FACT complex subunit	1456.07					836.909					1308.43	1408.64	791.915	1439.42	920.246		741.912	1379.26		748.001		1387.76	780.933		2029.15	1104.39	827.423				1036.44				715.932
A0A0J7L222	Inorganic phosphate cotransporter	896.572		365.4		4080.82	1588.15	280.083		1083.46	18015.1		508.036	1229.64															30797.3	32468.2				8196.28
A0A0J7L224	Chaperone activity of bc1 complex-mitochondrial-like protein (Fragment)	962.424		1215.84			245.031	262.69		158.39				508.341	1035.15	344.701			259.681					250.867			599.491						1271.13
A0A0J7L229	Adenine phosphoribosyltransferase	994.303		37666.5			1345.44	3409.32		1560.46		1230.61		383.386	375.16				3599.37									1465.65					12801.5
A0A0J7L235	Acidic mammalian chitinase										6632.99																		2998.38	3392.41					50041.4
A0A0J7L236	Carotenoid isomerooxygenase			637.753				775.199								459.086											400.857					857.14
A0A0J7L238	Beta-ketoacyl-[acyl-carrier-protein] synthase I	4707.18		13901.1			4366.95	7806.96		5518.26		7598.36	3681.4	3309.16	4880.98	1656.02		4974.96	5162.46	4986.33			3422.56	1300.1			2878.67	5274.59				4150.26	18903
A0A0J7L240	C-type lectin domain family 10 member a	1615.17				3604.81							1691.91		1049.29				1144									1468.32
A0A0J7L241	Nudix hydrolase domain-containing protein	1813.13		3001.32			1032.45	1794.45		2133.62		1139.93	1803.07	1100.19	1463.2	1306.3			1722.56				2702.22					1751.09				1016.11	3663.4
A0A0J7L243	Rna-binding protein 14	2428.51		1016			940.928	600.142		545.05	1855.74	1131.54	1909.18	1517.78	1276.28	1156.94			1491.87				2427	2673.68			2913.66	1866.09	1389.53			3159.78				5155.15
A0A0J7L246	Camp-dependent protein kinase catalytic subunit	21216.2		16156.2			18678.6	29544.2	11192.3	23731.2		21899	11490.3	21328.9	16743	23874.4	6393.1	17353.1	20671.9	18259.2	3406.76		17611.3	17454.7	3203.25	19595.8	30583.9	26591.7			8761.76	18618.3	17487.9			22761.1	20342.9
A0A0J7L250	Titin-like	13305.4	2752.89	19292.8			14158.2	19636.4		18495.6		25905	6295.86	4100.42	8552.99	3001.58		12577.9	20231.1	9871.23	8190		9310.93	3221.61	2643.8	6651.47	6421.78	12704.1				7697.44	60631.8			22177	26664.8
A0A0J7L256	Transcription factor gata-4	346.76										264.687	294.157		200.315
A0A0J7L271	Prohibitin	19190.3		38357.2			12318.8	17094.5	12827.1	13900.6	1173.36	12476.4	12797.3	16274.5	14075.1	13511.5	5637.78	10031	16795.6	8772.21	28072		14109.3	12329.6		12902.7	10460.1	17791.9			10158.3	15799	62204.5	4278	45084.9	19163.8	13020.2
A0A0J7L273	Eukaryotic peptide chain release factor subunit 1	2034.54	12625.5	6894.04			2445.85						2317.07		2528.83				1486.13		2546.12		1723.68
A0A0J7L274	Phosphoglycerate mutase	40692	23869.1	65600.3	34971.7	42286.5	63632.1	68755.4	70174.5	49205.4	13190.8	59870	48580.4	41861.2	63129.6	29000.1	60602.2	63570.6	54290.4	47291.4	104689	28527.6	67261.6	30970.5	55390.3	84269.5	32862.7	48545.7	21797.4	15385.7	61382.7	31806.5	46158.2	10598.2	67172.7	26563.4	39729.9
A0A0J7L276	Eukaryotic translation initiation factor 4b	3970.3	9343.53	2311.86	3507.43	2845.43	7817.99	2724.61		2422.96	54567.5	3198.88	6422.44	4295.17	5627.46	1584.75	6734.59	4118.72	6084.25	15674.9	7862.55		7921.43	3173.67	6690.65	3983.05	3957.04	5151.64	51067.3	28566.9	14642.3	5206.33		9038.05		7177.93	9402.5
A0A0J7L2A5	Cytochrome b5 domain-containing protein 2	678.303		1878.54		1201.42	751.35	925.794		1430.74		646.549	617.384		495.027			1504.1	288.505	1582.85	1513.86		1642.99					799.582
A0A0J7L2C4	Testis-specific serine threonine-protein kinase 1-like protein	856.712		2941.76			714.033	1150.65		1197.33		1092.45			610.027				1201.64				1899.82									1066	2449.36
A0A0J7L2C7	Presequence protease, mitochondrial	17054.2	8771.8	49723.6			22586.5	32581.4	11741.5	29780.6	5575.16	25951.2	22776.8	13591.9	16050.3	15546.9	5634.86	12224.2	10873.5	19429.3	5527.1		16087.5	14130.5		13001.5	11927.6	33682.5			23822.2	18141.6	16507.8			12523.7	12535.3
A0A0J7L2C9	Phosphatidylinositol transfer protein alpha isoform	2459.67		2110.47			1740.71	2840.96	2672.54	2305.68	682.561	3102.87	1817.9	2504.88	3087.75	2043.09			2472.61	4122.11	3865.66	10960.6	3487	1492.88			3614.98	3878.32				3768.3	1839.49			1877.81
A0A0J7L2D5	Nodal modulator 2	677.536		593.964				164.909		252.657		499.338	827.584						366.749					734.077								800.987
A0A0J7L2E3	Malate dehydrogenase	1223.33		781.993			242.666					492.512	1546.83	604.164	435.189	448.525			1297.55					638.104								1034.9				406.437
A0A0J7L2F0	Serine-arginine protein 55	13746.3	7651.82	5361.79			10591.2	4190.45		3043.42	9636.51	9848.88	11711.9	9312.43	14198.3	5113.99		6577.68	12375.5	10056	3896.44	7927.92	13827.3	9837.01		7107.08	9826.01	10184.3	7139.21	1614.83		12640.3	9373.51			11565.9	8760.7
A0A0J7L2F5	Cilia- and flagella-associated protein 157	36874		53051.5	2403.11		30185	42899.9	13497	42757	1950.95	35397.7	26773.2	26006.3	31842.3	44476.6	3115.86	29304.6	34032.7	18724.5	6592.43		28073.6	14794.7	3183.91	27531	19900.7	36541.3				22458.6	24348.9		54973.8	20351.4	24484.8
A0A0J7L2F6	Sperm-tail PG-rich repeat-containing protein 2	2956.64		2600.98			5822.44	5406.99		4401.39		3122.43	2555.51	3598.91	2155.5	3208.43		1498.21	1351.84				2867.62	7717.29				2529.47								10280.8
A0A0J7L2F7	Lysosomal alpha-glucosidase-like protein	1407.54		1383.58			1128.82	511.214		675.59	12010.6	849.036	1196.36	486.23	699.674	726.827			1974.16	1974.92	1357.04	4790.93	811.247	842.215			1055.58	1539.08	2567.59			2209.09	1976.37
A0A0J7L2G3	Tubulin alpha chain	596276	23607.3	517801	22784.8	17058.8	397675	510079	149992	631243	16955.6	459122	254090	285741	430910	290978	52428.1	372713	339084	275777	59159.7	3387.54	297866	258904	18579.8	356693	279867	444495	3133.83	4744.49	149427	286946	467040	9899.22	377876	285000	385015
A0A0J7L2G5	40S ribosomal protein S4	22995.1	9148.28	28462.9		1939.52	20949.5	6165.86	11915.9	8348.69	10270.6	19363.1	16383.5	12663.7	20020	9337.04		5891.49	23883.7	10153.1	5501.11	25964	27653.7	13274.3		7095	13030.4	11293.5	9791.76	1979.34	7975.7	11425	10653.8	8526.52		4498.6
A0A0J7L2H4	T-cell immunomodulatory protein	1026.76					785.728				1426.53		652.851		843.6	966.895			1148.55				953.246									1528.75
A0A0J7L2H6	Calpain-7-like protein	11398.6		30465.6			10994.3	14316.2	5266.12	15400.9		13480.2	8729.27	12166.3	9811.46	13516.2		8236.58	12322.5	7566.71	3993.58		8604.08	5528.12		6330.29	6261.66	14464.9				12917	27029.3	2342.97	61565.9	6974.98	6174.53
A0A0J7L2H7	Asparaginase	1252.27													363.592	983.928			1313.56													10345.3
A0A0J7L2H9	60S ribosomal protein L35a	10801.9	11876.6	4400.45	2299.45	2995.49	15133.3	2697.05	8682.69	2330.3	16968.2	6170.32	17350.3	12459	15269.4	4368.31	3777.82	13350.1	7392.98	14235.1	12721.8	4699.79	18689.9	8535.63	7046.88	14403.5	9904.07	12348.4	10356.7	7256.91	22184.6	6368.59	3893.98	4233.28		10918.9	19351.5
A0A0J7L2I9	Eukaryotic translation initiation factor 3 subunit G						538.104	171.373					1246.46		812.365								1316.86					901.658
A0A0J7L2J9	Ubiquitin-like protein 4a protein	643.993		1098.85		525.116	430.895	594.324	1711.57	1175.7		806.922	443.458		734.964		1287.02	1323.75	483.66		1032.39		1244.14					515.001					262.766
A0A0J7L2K3	Cuticlin-1	593.105	5789.05					1222.17			42825.2				259.83				467.428	10653.7	1122.95								8223.25
A0A0J7L2K8	Endoribonuclease dicer	584.863					223.528						558.832		278.63				377.497				692.427	526.951
A0A0J7L2L0	Wd repeat-containing protein 67-like protein	5666.44		10059.2			2970.53	6360.89		4283.96		6000.71	5823.13	7603.45	3597.99	10176.3		6770.76	5384.8	4476.87	674.978		6256.12	4235.41		7360.06	5155.31	5737.32				8883.8	8452.88			5685.61	7275.51
A0A0J7L2L4	Glyco_transf_20 domain-containing protein	25159.1	12852.9	11159.9	6341.32	3473.63	10721.3	5532.06	45801.7	1296.84	15365.9	14916	43505.7	21540.2	23444.8	8240.52	14523.7	10414.6	21167.8	31879	21437.9	34689	16031	29372.2	11319	12887.6	16321.8	9295.13	14579.6	3901.84	14119.4	20327.9	8738.6	3637.89		22103.9	11548.6
A0A0J7L2L8	Serpin b10	235724	195702	115480	81472	146172	201763	149968	305944	69128.1	1125580	101307	260543	195597	280682	232375	137993	208301	152735	662051	436067	491044	219578	326731	97726	157564	606280	224975	121083	212716	166333	526146	93453.6	66626.8	194254	338690	119327
A0A0J7L2M1	40S ribosomal protein S25	13319.8		4433.96			7691.34	4036.32		3943.47	4672.6	7563.18	11872.9	6413.3	8579.21	5138.93	7376.21	2710.99	10982.7	4811.49	2791.42	7003.15	12350.9	3686.76		5747.1	4194.18	6541.41	5964.94			17995.7	6299.31				6243.92
A0A0J7L2M4	Phosphoacetylglucosamine mutase	1191.83		3534.48			1290.91	629.233		1083.87		2743.18	1457.96	3832.07	1045.59	2811.92			1418.93		2128.62	7485.64	913.732		2598.1		1555.66					2340.88	3892.51			1870.94
A0A0J7L2M5	Endoribonuclease	4799.25		7758.33		2417.15	6266.15	1649.66		1646.77	6038.47	6724.71	4753.36	3920.33	5462.19	2805.84		5791.89	5113.83	4088.78	2688.11	8023.37	8000.95	2691.47		5534.46	8227.9	5945.92	5013.07	1413.1	2855.52	4389.86	3074.81	1144.28		9339.84	2293.99
A0A0J7L2N3	UPF0587 protein C1orf123 homolog	869.936		718.567	5654.31	5510.99	1205.08	893.182		553.022	3159.58		3145.76	1324.48	1960.9	916.577		5192.26	692.476	6396.44	5735.15		2434.77	1397.52	7690.55		1222.12	699.713						4591.63			9650.01
A0A0J7L2N5	Serine/threonine-protein phosphatase	496.501		2404.92			248.722	305.765		267.716		505.991	243.948		616.404				465.588				1091.73										1358.05
A0A0J7L2P3	Coproporphyrinogen oxidase	502.274		432.747			181.045	403.375				412.868	258.343	482.388	490.003	363.391			256.287													569.256
A0A0J7L2R4	Homeobox protein six1	432581	36924.8	309769	27729.6	27090.1	443628	354156	194929	459681	15275.3	420555	374344	399822	280250	311576	103072	293839	272071	340640	148467	13082.3	259644	361322	52527.4	416325	275747	385472	12609.8	12236.7	164612	90750.6	508392	8843.17		311630	297876
A0A0J7L2R7	Serine protease easter	738.297						437.954		458.692					980.067	903.321					2757.8											1294.32
A0A0J7L2S2	Protein sel-1-like protein	1234.14		1599.06		1654.58	739.363	689.932		1153.17	1270.63	1623.92	1759.93	1123.46	1197.75	1525.69	2066.8	2630.32	1574.91		1930.8		1770.75				1535.53	1309.27				1360.27
A0A0J7L2T1	Short transient receptor potential channel 5-like protein	3295.83		5008.85			2418.19	2828.54		3423.75		3946.22	3120.75	3575.86	4168.74	4346.93		3624.23	2700.12	2663.91			7155.31	2872.54			4441.74	4173.79				3831.03	2765.95			7698.77	2501.56
A0A0J7L2T4	Dynactin subunit 1	632.957		3206.65			373.526	357.348				428.137	609.798	1278.55		1968.43			504.704			5243.31	3373.25				1583.25						1481.57
A0A0J7L2T5	G protein-coupled receptor kinase	3268.31		3131.32			4596.51	4835.43	3248.89	6438.6		2763.78	3703.29	5479.01	6527.1	4778.7	2091.3	23268.8	15937.3	11126.4	5194.01		18537.1	5530.71	2616.44	29144.4		37757.6				22645.4	54847.9			4492.31	22387.7
A0A0J7L2V2	Armadillo segment polarity protein	3918.29	33482.7	18842.6	48165.2		4951.22	1508.67		3417.14	18062.3	28498.2		4189.14	5220.81			31075.2	4418.39	10469.2			5755.59	45840.8		9280.88	10100.5	5776.51	33950.4				18550.3	66760.5
A0A0J7L2V7	Beta-N-acetylhexosaminidase	17708	3442.86			2614.23	1607.42				2518.85		1493.01		1130.39	1398.88	3760.91	2484.04				6066.23		6487.83		10865.1	2878.63	897.629	1690.27	3460.66		3495.51				4555.37	2956.38
A0A0J7L2W5	Phosphatidylinositol--bisphosphate 3-kinase catalytic subunit delta isoform (Fragment)		2520.58	2512.93	1981.55	2406.28		443.538	49261.5	3750.02	875.083				2340.47	1331.47		2991.79		2470.25	1138.21							1524.97		45187.4
A0A0J7L2W7	Morn repeat-containing protein 3-like protein	11922.1		15632.7			17474.6	19003.3	5774.67	16778.7		15961.9	14648.5	17747.7	14750.5	8929.89		15142.5	12227.6	15351.9	7268.34		18534.1	7198.93		14547.7	11635.3	20843.4				10449.7	13836.7			9235.95	27177.9
A0A0J7L2W8	Bifunctional aminoacyl-trna synthetase	2360.65		2231.21			1194.98	487.668		777.925	1006.54	1868.01	1722.7	1641.56	1648.46	1906.26		694.331	2078.33	1541.92	1098.98	3980.25	2559.73	434.879			1055	503.073	1505.78			4038.71	4537.85			658.537	2268.3
A0A0J7L2W9	ATP synthase-coupling factor 6, mitochondrial	12875.6	7857.7	23658.8	3637.01	3486.06	25884.2	30887.8	9007.73	27662.7	28519.1	43821.6	29454.5	28918	15551.1	16692.1	10830.8	14810.8	15265.1	40069.6	29656.9		12729.9	4598.27	7983.54	19538.8	8216.59	28403.8	12151.3	2932.47	11238.9	14088.1	29882.1	3152.65		7741.17	19306.5
A0A0J7L2X5	RNA helicase	515.124											542.955						449.073													1612.13	545.619
A0A0J7L2Y1	Nucleoporin p58/p45		23196.9								1953.21											16498.5
A0A0J7L2Z3	GPI ethanolamine phosphate transferase 1	1917.35		6821.94			1137.85	3262.97		2328.64		1879.9	1598.58	2446.35	2126	2961.53		1475.24	2194.85								1129.48	2340.27					680.562
A0A0J7L2Z9	Guanine deaminase	3601.63		7218.57	13990.3	12017	5203.15	4775.72	16186.9	3404.73	2040.41	4651.81	4302.07	3022.92	4796.8	3632.92	15265	9880.29	2154.13	11061.8	19806.6	16485.9	7751.13	6346.04	15488.3	9993.4	5739.53	8328.78			18089.8	1542.59	3502.69			7060.64	8458.63
A0A0J7L305	Rib43a-like with coiled-coils protein 2 protein	51831	3415.96	52361.1	3669.25	3971.52	40839.6	40387.4	30537.4	44288.1	11036.4	64022.1	39558.3	34277.8	40764.2	23645.4	6554.7	48469.4	49685.5	40372.6	17748.7		53397.1	17848	4897.01	53847.3	29508.3	61799.5			9999.81	49144.3	109541		230574	15469.6	34177.1
A0A0J7L311	Tetraspanin	23225.9		21699.3	99313.6	155900	50289.8	17116.1	276539	28043.6	80800.2	62398.1	17019.6	32193.6	24857.4	32729	215415	202134	14367.8	153668	169016	11630.7	84094.2	97762.9	223252	172839	75898.8	100386	106924	158450	159913	21736.6	9577.81	24058.5		57451.4	155151
A0A0J7L321	Exportin-7 isoform x1	3182.3		4283.33	6980.67	8263.43	3548.55	2524.4	4555.01	4888.47		4532.27	2508.17	810.416	3002.52	1696.12	6501.69	9125.49	2710.96	9756.33	4541.3	5398.19	6849.29	2097.19	16049.7	5163.24	4258.93	4343.97				2670.84	6569.02			4530.92	4615.45
A0A0J7L327	SUMO-activating enzyme subunit	2376.27		2570.78			2161.14	1038.45		586.628		2820.34	3463.16	3197.95	2715.37	2290.5			2313.85		2577.88	2392.28	6649.66	1867.38			2198.84	1541.08				4852.52	1360.4			2507.75
A0A0J7L328	Trehalase			1085.39			840.843	450.155		582.058	2145.07	563.882	891.721		519.524			1217.71	575.505	946.395	1540.05								1201.23
A0A0J7L342	Aminopeptidase-like protein	14816.4		13638.1			23975.2	10990	5505.98	14594.1		12855.1	9282.99	4674.79	16308.2	2312.86		14860.4	7782.21	15953.8	2330.44		11979.5	7514.66	2489.03	6390.81	9371.99	14199.3				1718.72	19319.1			5783.23	6824.46
A0A0J7L363	Putative lipoyltransferase 2, mitochondrial	2472.32		11850.6			2218.19	4795.8		5389.33		4974.71	779.105		3226.35				4317.12				2317.9	1550.94				2278.88				1025.91	5775.8
A0A0J7L382	40s ribosomal protein s14	11913.6	11058.6	5635.59	3359.24		4731.57	2951.04		3190.65	4536.63	3223.2	6376.06	4416.78	3237.71	2027.81	47285.2	8837.8	5333.58	2411.01	5626.67	5961.1	5694.17	6228.74	5762.06	8853.24	4403.84	4562.56	8498.8	4315.54		7485.69	5573.66	5599.31		6146.17	7092.67
A0A0J7L388	26S proteasome non-ATPase regulatory subunit 2	3707.93		5142.51	15395.9	15571.5	4772.78	4336.1	12108.7	6150.37		6418.21	2540.12	6000.49	5001.65	7107.25	20291.9	10201	3591.84	12173.5	11065.8		3766.53	8696.58	8808.75	9983.32	14011.6	7234.65				3788.66	9130.21			20675	10719.9
A0A0J7L390	Putative aminoacyl trna synthase complex-interacting multifunctional protein 2-like isoform 2 protein	163.76		546.474															83.6502
A0A0J7L395	Glutaredoxin-3 isoform x1	3521.77	1524.43	9989.09		1195.76	4319.99	1803.56		1252.2	1318.4	2204.78	4863.32	6004.88	3106.97	2462.97		1774.48	3334.02	1916.1	2193.75	780.691	2596.51	500.83			984.897	1953.83	1378.55			4665.2	4158.07	1868.26			1783.09
A0A0J7L398	Phosphorylase b kinase regulatory subunit			502.537				137.95											241.474
A0A0J7L3A0	Eukaryotic translation initiation factor 3 subunit D	1255.96		2203.05			1382.86	605.005				1591.23	2557.84		568.519	709.773			1694.65		1500.32							1634.13					2119.88
A0A0J7L3A2	Spc7 domain-containing protein	1369.86		723.788			163.938				2117.59	727.338	1953.81	332.578					1040.26		1620.23			1328.26									2036.27
A0A0J7L3A4	Importin-7-like isoform x1 protein	2558.41		3515.34			1286.25	563.339		921.839	948.325	1722.17	2218.94		822.633				1693.17	1812.94	671.873	2722.86	2183.47	1021.8				1330.32				2055.89	1837.4
A0A0J7L3C0	Nucleolar protein 56	14425.1									12378.1	6704.65	11197.8		10316.2	15430.5			9192.25				11855.8			37675.4											21366.8
A0A0J7L3C1	Calumenin	22125.8	29497.1	11005.9	62364.2	11284.9	23232.3	5005.41	4032.74	8358.89	102699	20628.9	29762.8	17249.1	16405.9	9978.97	6619.11	101096	25010.3	34313.3	12314.8		15793.1	8293.29	42602.2	17846.2	6360.07	16322.3	63008.1	27972.1		10451.2	16513.6	44452.2	85322	7403.35	8103.48
A0A0J7L3D7	Golgin subfamily a member 7b	3485.16		1522.9	9898.79	12091.9	2283.53	1870.62	10110	565.869	5626.14	3930.04	4288.91	5867.72	2624.51	8437.92	10138.1	8498.94	2140.31	9782.68	9513.1		4954.48	1898.31	10952.7	9076.78	4689.04	4237.88	9215.04	9672.79		4574.77				5639.88	9280.5
A0A0J7L3D9	Uridine diphosphate glucose pyrophosphatase	1122.02					902.325	364.265				775.774	882.069		990.141				1004.58		991.506		1131.04					758.108				2200.47	1519.21
A0A0J7L3E5	Thioredoxin domain-containing protein 12-like protein	143267		77065.2		7253.49	80681.5	91408.5	37899.5	117602	1528.38	162797	82103.9	109745	89737.4	118710	18648.4	117330	140206	68279.6	21086.8	3429.84	104805	106401	10477.9	77368.8	112840	86944.3			32186.2	139250	148278		152442	77592.4	132980
A0A0J7L3F3	Apd-3-like protein		29286.7		1928.62						40139.3										2894.18								10093					11390.8		2570.26
A0A0J7L3G7	Cofilin actin-depolymerizing factor-like protein	30814.4		584703	18568.1	32685.9	44658.6	42067.8	60699.7	56500.1	7985.11	51986.8	19823.4	28715.8	22064.3	33655.2	53353.8	44121.5	65628.6	36205.6	58659.8	45954.5	39861.4	48384.3	43834.6	40090.2	28195.4	50664.2	11189.5	8564.09	25869.4	32386.8	106712	8894.88		24074.2	17545.2
A0A0J7L3G8	Phosphoglucomutase-2	3965.07	3458.13	4806.33	7756.86	7849.05	4240.09	2322.88	13306.9	2218.68		4728.5	1927.25	3467.46	2588.42	2531.9	9527.41	3932.19	1549.23	7474.76	5698.3	7827.01	4033.85	3093.78	6870.22	7722.02	3835.52	5113.83			24717.9	3325.49	2964.14			4712.04	4415.71
A0A0J7L3J0	26S proteasome non-ATPase regulatory subunit 9	2388.77		2773.84	5896.78	5206.18	4384.73	3391.97	6006.89	3715.72	2536.04	2243.47	2707.08	3106.74	3535.01	3451.3	6753.65	4632.59	1705.17	3418.36	14755.4	3374.66	3590.59	2550.52	5626.55	5734.69	3700.38	6525.37				2389.01				2216.71
A0A0J7L3J3	FH2 domain-containing protein	1718.81	4877.1	2329.11	6494.76					2411.78	12245.4		1016.57					1013.04					367.869			3686.01		2465.06	2117.73
A0A0J7L3J4	Sarcolemmal associated protein	13668.5		18588.8			8237.02	9081.98		10706.7		11305.5	10005.3	12265.2	9730.76	19206.7		7807.16	9163.2	10541	4613.36		8620.28	10972.2		15485.4	9506.12	10786				10376.5	23732.9			18000.3	18628.3
A0A0J7L3J8	Neutral endopeptidase	877.997	23465.6		144600		2664.1			1049.38	7795.43	13455	1135.46	1266.31	10307.3		4995.08	8146.97		20763.1		11913	5209.34	13188	27685.1	6019.49	10946.4	4220.45	50707.6	13551.4				184130		2407.28	9399.8
A0A0J7L3J9	Sterol carrier protein 2	8904.33	4749.65	15134			5712.86	5306.99		4121.99	6275.88	15129.2	18591	5439.08	6028.69	7435.31	4395.87	5872.41	16597.5	4662.8	1917.67	3155.06	13869.1	3281.33		5232.2	8516.7	4237.56	9219.7			12831.2	12995.6			4923.52	3403.87
A0A0J7L3L0	Moesin/ezrin/radixin homolog 1	30935.7	25725.6	44229.3	22736.8	32582.3	38741.1	24433.6	34728.7	18145	35316.1	36521.3	39071.1	20208.5	49213.9	20180.9	40280.3	44214.1	42234.6	41750.7	28903.4	58540.4	60922.2	50552.5	36097	33629.2	72802.5	37611.1	23073.2	37300.2	93787.6	51957.7	37014.6	11673.9		84745.3	39662.5
A0A0J7L3M9	Preprotein translocase subunit-like protein			1015.46				487.195
A0A0J7L3N2	Dystroglycan 1	568.342		412.356			826.42			326.52	1625.51		1339.62		531.018				935.78		868.047							951.724	2286.96			1218.03
A0A0J7L3N4	Adp-ribosylation factor-like protein 3-like protein	910.338		5170.16		1765.96	1226.69	2632.22		1670.97		2594.27	1103.41	1204.42	806.81	1449.22	2411.77	641.293	2021.26	2010.58	2343.87		1609.91		819.895	1267.94	3348.65	1646.06				1467.36	2581.29
A0A0J7L3N5	Nf-kappa-b inhibitor cactus	488.254		663.375			382.134	150.516				1211.47	560.358		353.94				694.501				537.882
A0A0J7L3P3	Prefoldin subunit 2	3162.31	4099.54	3028.38	4045.53	4056.15	5256.58	1943.79	2194.54	1184.83	2790.95	2160.38	7324.43	3018.99	6262.02	2395.23	4906.31	3260.17	2947.52	6287.8	5982.29	3460.24	5729.35	1647.1	3050.07	2050.53	3519.52	3455.4	3662.47			2874.83				6189.5	6253.29
A0A0J7L3P6	Protoporphyrinogen oxidase	2101.87		1667.19		953.263	1250.34	1609.39		1411.65		2156.67	1791.71	2076.47	1552.68	1621.97		1928.91	1207.33				2795.02	596.566			1904.62	3713.21					2034.91			852.92	1916.01
A0A0J7L3Q2	Putative nuclear pore membrane glycoprotein 210	3340.57		4876.27			2150.67	3512.4		5463.86	1295.99	5031.8	2451.25	3228.12	2382.96	4324.2		3832.43	2707.51	2041.21			3009.26	2430.54			3262.31	3310.64				2798.41	8471.92			3863.37	5132.78
A0A0J7L3R4	Histone h1-like protein	3345.45	9025.46	1998.77			1450.23	511.434		830.7	8208.63	3237.86	4205.82	1017.02	3585.83	1195.24		1659.16	1661.52	2100.64	1156.59		1205.12	639.656		4398.13	1212.42	1864.78	10328.1			3925.01		449.717		1821.99	774.322
A0A0J7L3R6	Atp-binding cassette sub-family f member 1-like protein	610.771		1311.42			610.995	242.258	7278.64	356.516	2847.55	925.959	546.133		621.822				660.402			9159.23	979.873				1054.31	276.238	2799.44			535.439	1399.26
A0A0J7L3R9	Delta-1-pyrroline-5-carboxylate synthase	3837.38		4916.6			1949.52	642.523				5273.25	5034.92	3736.67	5494.49			2306.33	5954.94				3206.94	3257.11			1947.9	1484.1				2277.54	5425.15			5702.51
A0A0J7L3S1	Small nuclear ribonucleoprotein Sm D3			14882.1			439.59												3205.82
A0A0J7L3S7	Aminopeptidase n						2551.91		6417.81		19304.2	6373.68			11876													4946.75	17109.9	76047				10811.5
A0A0J7L3T0	Haze protective factor 1-like isoform x5 protein (Fragment)		2922.07	1025.7	2440.96	1784.59	1332.72	1272.33			22395.3				994.333	1037.44	10735.8			3483.74	4287.86			2079.72	1986.35		1839.85		9515.05	3596.05				2316.23		1799.29	132139
A0A0J7L3T2	Ef-hand calcium-binding domain-containing protein 1 (Fragment)	7600.96		8611.2	29625.1	25911.3	5959.76	5730.02	30434.7	11142.2		6926.89	6363.88	7932.5	6558.52	8883.02	67941	15002.7	3698.33	44214.6	74966.4	11896.8	9080.52	6073.88	21738.3	13561.5	17018.4	11362.1			25288.4	20264	5115.4			32779.5	10123.5
A0A0J7L3V2	Titin-like isoform x1 protein	186040	38522.8	148852	12212.7	12631.1	147111	105050	61606.4	148462	8760.54	126206	124184	154118	110408	166849	35737.3	175525	99709.1	126937	95866.6	10820.8	100978	95039.1	31169.6	174336	173588	204714	5361.89	3822.52	86831.6	62009.2	118449		619969	191574	96345.9
A0A0J7L3Y2	Protein lethal essential for life-like protein	1433.97		183.707			1077.22	262.261	3672.82	550.109		589.013	470.581	974.093	1850.3		5086.27	957.493	374.457	2013.77	15990.8		464.166	5772.17	3047.97			986.096
A0A0J7L3Z2	Myelin p2	106302	24144.5	68149.4	15202.1	9105.99	98112.4	33676.2	50350.6	12492.5	23544.2	54680.4	192118	77393.5	124210	57321.8	21709.3	43104.6	74854.5	59764.1	56544.4	46724	163844	247563	13960	43721.9	32318.5	61822.5	27390.5	19977.3	57113.2	63739.4	50422.1	11231.1		164168	11188.9
A0A0J7L3Z3	Epimerase family protein sdr39u1-like protein	2782.58		5559.62			2898.21	4465.41		5650.82		3763.78	1730.79	526.758	3581.76	144.1		1459.03	5697.33		1412.49		5401.43	3487.87		1840.55	6915.17	2856.63					12519
A0A0J7L401	Es1 mitochondrial	142980	16489.3	210265	6538.37	5705.7	132593	129189	42053	165994	13331.2	140337	75372.4	62993.8	72561	62205.8	13033.2	77455	140687	72778.5	19841.5		63229.7	61783.4	5053.65	75018.3	49920	108493			24564.4	71331.9	247696	61628.2		141746	109903
A0A0J7L402	Ets translocation variant	3501.16		10333.2			4483.78	1820.91	9143.78	1025.93	4589.31	3763.59	7623.6	6042.83	7445.14	4335.43		6152.39	4446.05	8017.14	6333.5	2017.33	8879.23	6096.73		6501.92	6005	5391.66	7547.96		10101.7	5816.68	10365.8			9270.21	5237.92
A0A0J7L405	Low-density lipoprotein receptor-like protein		8323.59								33559.2											48183.8							4070.71
A0A0J7L408	Beta-ureidopropionase-like isoform 1 protein	442.704		3296.1			645.822	198.315				204.555	1739.56		1244.85				997.591					3315.72									1866.76			2560.04
A0A0J7L410	Esterase e4	4806.52		3685.95			2166.08	837.6			1931.88	2485.87	2763.75	892.445	1408.49	486.462			2217.54		679.627		538.757					1011.8				5467.71
A0A0J7L411	MICOS complex subunit MIC60	252496	9114.05	162595	9350.13	7107.32	134453	213357	65925.1	184678	5583.16	244752	165006	107495	134633	129341	21898.5	139829	256475	136828	42926.9	6379.95	139624	74096.3	17673.1	134983	71169.7	160678	2021.28		30948.6	171098	547749	17811.5	808420	55789.8	87343.7
A0A0J7L423	Rootletin-like isoform x1 protein	118672	2197950	184058	2003270	2493010	422138	180775	1926730	181056	1603590	103688	133056	101885	295427	35948.4	1606230	3729640	51149	2199470	1812230	892500	953725	747847	4147120	4127070	310145	1410250	1970670	2114760	1784380	55949.4	33513.2	5376140	72726.5	432931	1819630
A0A0J7L426	Leucine-rich repeats and immunoglobulin-like domains protein 2 protein						912.14						677.38		321.611				583.17
A0A0J7L429	Cell division protein (Fragment)		4468.1	2766.09	3315.99	6446.76	979.869			999.722	20372	976.784	1968.16	1416.11	7978.15	4589.08	93863.3	2961.23		6442.08	2396.31	20162.4	3051.22	3084.78	3074.22	8504.05	1951.91	2325.7	6990.91	11130.6	15970.7			16970.7		2723.74	4978.57
A0A0J7L437	Constitutive coactivator of ppar-gamma-like protein 1 protein	3019.1		1416.5			1312.07	717.517	4975.24	309.445	1528.27	1773.12	3933.93	1388.19	1754.14	1807.56		840.726	1824.16	2570.17	581.629	5588.25	4615.55	1223.56			1774.35	1397.17	6023.27	4637.27		4549.42			24724.4	2093.71
A0A0J7L446	Myeloid leukemia factor (Fragment)	517.713		473.25				423.747		272.48
A0A0J7L447	Nedd8-conjugating enzyme ubc12			585.771			259.498	173.39
A0A0J7L448	Sulfotransferase 1c4	4331.88	2101.99	7340.71	1385.29		2699.12	2096.84	2357.2	782.387	1722.35	1718.66	5134.23	2837.3	1556.2	2092.8	1126.79	2659.02	1668.9	1350.19	1268.18		5345.8	535.084		1315.08	2207.17	2507.17	2280.65			3189.97	3746.33
A0A0J7L453	Nucleoside diphosphate kinase 5-like protein	239168	10022.5	308006	5282.02	6255.34	203351	217055	70390.4	338148	9085.58	268167	200456	165894	202683	91584.4	12633.5	144005	246802	135590	25336.1	2739.23	198030	49461.9	7800.61	157884	116015	260021	2497.58		36696	162709	353093	9254.01	209313	26019.8	127655
A0A0J7L461	Atp-dependent clp protease atp-binding subunit clpx-mitochondrial	1764.76		1706.96		635.69	1304.83	1651.36	3364.36	4220.54		2263.08	2066.84	1280.86	2596.84	3373.64			1296.45	4450.26	1669.65		2244.85				2002.07	2302.75				1418.53	4677.4
A0A0J7L465	ATP synthase subunit d, mitochondrial	11474.5		17903.9			10492.2	12501.1	3414.48	11246.3	2734.93	10449.7	11657.2	13407.7	9967.73	12918.1	3065.41	9014.34	9280.7	7113.72	4105.48		7877.32	14781.3		10221.6	17516.4	14105.8				9147.24	12102.3			41669.2	9958.04
A0A0J7L466	Heat shock 70 kDa protein cognate 3	8360.84	9613.35	13799.4	9432.38	10976.2	7688.17	3235.27	8893.03	6836.69	8508.19	7068.74	9574.04	4460.35	5379.89	6309.57	15836.3	16614.1	8529.3	10072.4	11545.8	3813.27	6386.16	7128.6	6933.62	10022.6	7724.92	7641.49	4701.53		20465.1	8603.14	10903.4	1835.86		18389	16256.4
A0A0J7L469	26S proteasome regulatory subunit 7	8100.42	14207.5	18493	15929.6	19438.8	8493.09	6059.17	22798.5	10381.8	1146.12	11437.2	5144.57	5692.56	6299.62	6858.19	17086.7	15100.6	7242.89	15161.4	24877.3	6271.4	5204.02	5740.33	12612.4	12287.4	10912.9	10475.8	1141.96		19458.1	11262.2	12588.2			22124.6	12666
A0A0J7L471	Alkaline phosphatase						1030.78			142.989	732.542																			10795.8		705.409
A0A0J7L478	60S ribosomal protein L13a	4708.75		3435.97			2681.66	1321.95		1194.39	1108.36	4765.76	4515.47	4761.15	2938.51	2725.29			7439.51				4538.06	4187.38			6738.49	2096.68				2373.68	9242.64			14062.8
A0A0J7L480	ADP-ribosylation factor	2037.6	13007.1	4336.85	1840.25	889.844	1492.76	957.222		906.198	716.783	2379.33	766.462		1060.19			2221.45	1633.11									1369.11					2156.87
A0A0J7L490	Tetratricopeptide repeat protein 28	124529	5732.88	172433	2668.08	3824.74	101323	121364	33465.3	131537	4759.83	150252	85586.9	78536.5	113168	88798.3	8688.39	72413.4	135970	60142.6	7051.21	3184.82	114089	52111.6	5395.53	60007.3	104507	87689.8	1492.41		48905.6	122200	149559	4495.19	159673	30900.6	89356.8
A0A0J7L4A0	MICOS complex subunit MIC10	62320.5		112514			54522.4	67007	8173.92	79099.3		90352.6	20492.3	12191.3	29602.6	13580.5	3230.08	22279.3	86252.2	19358.6	4508.29		41723.8	9245.67		16837.4	18270.1	31309.1				30423.4	92882.6		31486.4	2836.77	18747.6
A0A0J7L4A1	26s proteasome non-atpase regulatory subunit 14	6567.92	15731.4	25218.1	24036.7	40867.8	6822.03	3645.98	22870.4	5958.73	4793.23	6129.72	5399.19	7685.05	7225.15	12663.2	31807.9	20449.2	3019.82	23013.6	36205.7	10257	6425.9	7003.8	11478	20034.8	10157	13293.8	4487.16	3840.44		7607.63	6635.78			24870.2	11452.3
A0A0J7L4B6	Ubiquitin carboxyl-terminal hydrolase	5287.67		20334.3	2403.2	2768.11	6790.22	5673.08	19530.3	7110.71	4590.64	7635.03	5607.91	2254.3	7205.5	6995.17	5218.59	5231.67	10976.7	19888.1	17016.3	12524.1	5168.02	3865.8	4740.05	5529.99	4268.59	5538.41				27717.2	10230.2		169653	9111.56	5712.2
A0A0J7L4B7	Cbp80 20-dependent translation initiation factor	801.773		1432.67			459.48	122.653				974.833	484.327		531.83				892.951									929.358
A0A0J7L4C1	DUF4776 domain-containing protein	141753	14333.6	220334	12445.4	9194.09	131734	148364	75261.6	174396	11166.2	160196	75162.5	110647	100602	78964.8	23536.7	110136	111816	108015	47846.4		112378	48755	13032.5	135139	59969.7	156099			93208.4	77233.1	142547		566106	38286.2	88026.1
A0A0J7L4C3	Big_5 domain-containing protein	14180.5					8110.39	7167.68		8996.02		11552.5	9366.08	9688.6	6849.11	13889		9871.85	10711.9	8628.3			12002	5201.23		10001.1	17977.8	10133.6				19105.3	32861.8			4007.96	19970.9
A0A0J7L4C5	Serpin b6		16154.3								55242											134982							37182.1	39002.8				20873.3
A0A0J7L4C9	Stress-induced-phosphoprotein 1	2715.66	4108.69	4312.04		2853.02	2580.5	1075.79		727.678	3509.91	2061.36	3944.99	2350.41	2321.82	2234.76	1424.75	2017.91	2878.26	3372.49	2778.41	7257.81	3817.45	2199.53	4154.81	5932.36	2392.65	3106.39	3579.59	14548		3625.35	2763.79			4163.98
A0A0J7L4D4	Cuticular protein analogous to peritrophins 3-c		6356.63								37315.9											14234.6							12092.7					3897.79
A0A0J7L4E4	Toll-interacting protein			1121.49			98.5869	62.3587
A0A0J7L4E5	E3 ubiquitin-protein ligase																		325.668
A0A0J7L4E6	Major antigen-like protein	12362		10990.9			10319.6	14032.6	4225.4	17203.7	1062.31	17556.8	4177.02	10108.3	9753.22	24659		5114.26	10032.4	1686.23			6487.78	8485.42			4087.79	10017.6				6393.98	17130.4			17495.1
A0A0J7L4E9	H aca ribonucleoprotein complex subunit 4-like protein	2633.64		1130.91			749.342	309.31		522.378	2049.51	1389.93	442.571		475.629				1401.89
A0A0J7L4F3	Huntingtin-interacting protein 1	357.615		508.153				150.502				598.263	429.307	204.016	365.508	398.074			619.053	328.451			917.78									1173.45	883.133
A0A0J7L4F8	Oxysterol-binding protein 8	836.076		1175.26			456.107	727.01		1156.26		292.14	361.214	620.92	592.032	678.601			445.921		258.672				642.483			397.077					1197.17
A0A0J7L4G3	Inositol hexakisphosphate and diphosphoinositol-pentakisphosphate kinase	590.327		1306.74	1708.47	2200.87	875.292	692.788		1943.71		2787.42	533.776		568.886			2517.16	1737.08	1411.43	1573.97		968.525		3289.25			728.668
A0A0J7L4G6	DUF4746 domain-containing protein	180661	13331.4	276914	4552.62	7226.66	178348	220733	70096.2	215725	15671.1	207183	118993	192123	149204	151633	25849.4	145246	149266	135955	51076.4	8772.23	156368	139756	9269.36	175229	163650	186159	4318.8		45991.7	104216	318931	26854.6	220070	199833	151729
A0A0J7L4H0	4-aminobutyrate mitochondrial	1825.23	2577.39	3934			868.067	801.102		581.462	9631.26	1043.83	1277.85		1209.12				2085.76	2671.52				940.323		2232.59		708.046					7592.22			1225.27
A0A0J7L4H2	Tryptophan--tRNA ligase													5101.61
A0A0J7L4H4	Pyruvate dehydrogenase e1 component subunit somatic mitochondrial (Fragment)	286420	19707.3	471149	20959	13435.6	185889	422421	91930.1	331190	18003.3	246808	126137	165870	170816	387363	59351.7	101724	168356	92465.8	95488.9		129320	499118	12202.2	157627	403527	131557			99027.5	186955	144807	27309.8		465909	196970
A0A0J7L4H5	Wd repeat-containing protein 47	455.274		1698.13		1145.89	622.13	444.756	4631.82	471.768		807.551	565.995	1012.22	433.569	590.762		1275.52	451.98	1190.63	1712.11		1930.94		926.559			1047.87				1284.83	857.372
A0A0J7L4H8	Pyruvate dehydrogenase phosphatase regulatory mitochondrial-like protein	5786.47		4781.07			2770.53	2006.91		3607.05		3441.56	2608.5	5895.22	3705.7	3470.32		4842.68	2977.57	3551.89	2617.43		5517.01	2546.36		5467.99	4530.68	5230.5				5297.84	6687.65	13984.9		2204.18	4963.97
A0A0J7L4I7	Muscle lim protein mlp84b-like protein	10726.7		773.406	1918.49	1047.33	458.85	287.32			1681.98		7356.44	612.336	447.717	1102.92	2377.36		927.461			17503.6	383.207			4698.11	576.144	4944.89	4088.71	2663.6			1424.17	3409.01		1864.24	3261.2
A0A0J7L4J9	Protein npc2-like protein	2546.12		2237.14			1556.11	362.169			4748.23		4537.3	1423.23	681.533				1820.85	3589.41				2586.78					1513.29			9359.68	3238.05
A0A0J7L4K3	Glutathione s-transferase 1-like protein	307.331		2634.02			806.33	348.353			1360.16		700.251		348.567				518.853				1223.28	182.245								1008.86	2122.56
A0A0J7L4K7	Ubiquitin-conjugating enzyme e2 variant 2	54394.8		34554.8	72334.8	53837.3	43245.6	20619.6	69904.1	44547.5	10021.5	58507.4	39365.9	43340.1	32281.9	53756.3	74628.4	59987.4	71589.8	67596.8	115402	5735.74	93836.8	21862.6	83903.1	61497.3	50221.8	48013.6	8966.11		46791.1	55946	40776.8		79854.1	50922.4	42867.1
A0A0J7L4K9	Protein MON2 homolog	11301.4		21634.9			5424.68	13740.8		12199		9644.5	4391.7	3450.64	2037.39	2170.49			8375.9				4249.36					7346.97				4870.24	23571.4
A0A0J7L4L1	Heat shock 70 kDa protein cognate 4-like protein	9928.45	11055	13328.2	15320.4	5472.66	8443.13	10363.7	12943.5	13138.4	2400.57	17618	5846.48	7736.42	2854.98	9290.86	16697	12341.7	8296.21	5745.73	11461.8		20706.7	5124.39	3173.49	13037.4	21373.9	7153.96	12879.7	48858.3	13631.9	20301.8	30961.2	14748.5		18048.2	5299.79
A0A0J7L4L4	Microsomal triglyceride transfer protein large subunit	3714.38		2070.61			1021.71					1501.39	2713.38		1225.28	1230.85			1667.75				2152.5								5115.18	1535.41
A0A0J7L4L9	Cullin-5	1005.14		373.055			432.495	582.485		574.07		1181.31	1038.11	758.426	317.162	492.915			908.214									546.224
A0A0J7L4M0	Ubiquinone biosynthesis protein	4769.44		5087.45			2096.59	2895.94		2508.09		2211.12	1818.74	3540.95	992.328	7079.47			1245.07	1720.95	767.485		1958.92			2847.77	2438.44	2875.57				1684.12	2360.21
A0A0J7L4M3	Electron transfer flavoprotein subunit beta	6637.51	6501.48	11973.3	5957.97		3479.17	3317.42		2061.03	4424.21	2766.51	5701.71	4094.71	6265.81	3848	22491.7	4558.67	4490.29	4486.05	3172.13	8368.29	5929.5	8033.11		15263.5	6847.53	12066.4	3040.53			2734.64	3170.29	4321.64		10117
A0A0J7L4M5	Spondin-1			1028.66			460.877				644.441	563.5	1472.31	549.293	803.331	437.743			825.794			13402.9		640.702
A0A0J7L4M9	40S ribosomal protein S18	8716.86	5035.88	3228.67		2694.18	6558.78	2118.27	4959.65	1331.49	5712.07	3996.42	12165.4	5668.05	8325.59	4162.64		2948.79	4913.61	4233.57	4797.75	15509.5	14170.7	7675.95	1710.71	7086.52	7432.56	4963.58	5232.93	1900.62		5708.63	2909	4751.58		3037.13	3961.74
A0A0J7L4N1	Cd109 antigen	4873.09	1512.75	10318.3			10918.9	2029.21	11236.3	1292.78	1037.21	4825.12	14363.7	8436.06	12427.9	4536.88	5513.49	6317.85	11673.4	6066.63	2589.58	4711.88	6140.89	7351.9	3419.59	5741.15	3547.11	6359.45	2665.02	15664.9	24461.1	16977.6	6512.03	1075.15	71588.6	8365.99	7188.37
A0A0J7L4Q7	Wd repeat-containing protein 47 isoform x3	750.046		2172.69			1013.33	1525.86		918.679		1253.11			780.489			946.384	698.471									1237.08					1219.55
A0A0J7L4R5	Chitin deacetylase 1										3283.26
A0A0J7L4R6	Spectrin alpha chain	7865.16	8436.84	4312.81	13278.5	3239.2	4040.75	1184.94		1640.54	3742.13	9622.76	7225.33	3474.53	4143.71	4185.72		4422.77	7244.6	4451.64	3660.38	6958.22	5195.13	2354.75	15874.4	5437.3	5599.27	7262.95	4633	5537.3		9728.85	8273.42			5338.8	3228.51
A0A0J7L4R7	Tetratricopeptide repeat protein 37	404.994		151.079			158.937	129.278		85.7486		363.473	344.758	174.528	375.52				259.279				528.781
A0A0J7L4R9	N-alpha-acetyltransferase auxiliary subunit-like protein	1142.18		3137.6				433.116		315.19		275.135							419.258
A0A0J7L4S6	Mitochondrial sodium hydrogen exchanger nha2										10596.1																		6138.32	11174.5			1545.47
A0A0J7L4T0	Microtubule-associated protein	2937.25	11194.8	6406.55		2358.03	7952.89	3146.21		3664.74	8089.47	5945.99	8793.08	3968.42	9160.68	4108.68		6632.81	4763.64	5754.03	10531.8		13851.1	2009.01	2876.09	9079.03	6767.13	10280.4	22260.5	4935.46	7145.77	8608.9		3877.82		4500.28	11553.4
A0A0J7L4T7	MFS domain-containing protein	3386.97		2321.52	4243.52	9017.61	4124.67	2661.68	11530	6103.46	1318.72	3078.43	3158.89	900.812	6752.36	390.706	9326.17	2402.69	18454.7	3691.48			7464.71	540.284	13762.3	4341.55	2056.61	3149.26				13524.9	7842.3
A0A0J7L4V4	Heat shock protein 83	5523.91	4914.16	2959.67	995.244	7278.98	3258.16	1778.55		3791.3	4942.65	3549.96	5550.63	2616.93	3260.84	3462.08	6968.45	9789.13	3037.08	4731.75	6879.73	7211.8	4706.77	2206.12	4606.45	7898.28	5676.74	3741.14	2290.57			4384.15	10337.2	2549.76		6205.39	2489.82
A0A0J7L4V7	Transgelin	4475.71	3084.76	4411.5	1036.58	1382.28	3389.44	1815.08	2781.82	1108.77	3676.59	2512.05	4555.75	4405.84	5988.25	2507.89	2179.99	2305.49	4039.34	4311.01	3249.92	4593.32	8597.65	3164.57	1043.31	4408.18	4216.3	5303.36	6561.19	2754.27	6641.3	5775.74	3281.25	3877.29		3866.55	2839.15
A0A0J7L4V8	Dnl-type zinc finger protein			492.228				346.947		440.975	800.947			290.046	379.826					640.13
A0A0J7L4W2	Calcineurin subunit b type 2-like protein	63583.2		122154	7463.73		98773.9	148224	21753.1	149281	3144.94	93624.3	34959.9	10860.2	84069.1	9816.15	8132.91	80769.5	42942	41408.6	16982.1		85683.4	25404.4	2998.07	32940.9	19232.9	116616	59222.6			61359	59002.1		71854.3	10501	30953.9
A0A0J7L4X0	Dynein heavy chain axonemal-like protein	38829.6		64761.3	4536.51	5431.33	33328.4	40219.5	17296.6	39758.1	7705.5	44053.1	25844.6	35886.7	31884.9	37229.2	6923.21	29473.9	35675	26611.1	9025.66		35393.8	25202.5	15940.1	39811.2	36832.3	41201.3			38221	31476.3	39275.1	43468.6	165791	32613	42324.6
A0A0J7L4X3	Niemann-pick c1 protein			4363.91			790.256								570.744								1948.62
A0A0J7L4X5	Secreted protein	324.634		714.699			293.755	281.818				390.771	791.791			896.3			291.548
A0A0J7L4Y9	Btz domain-containing protein		1663.5								8252.55																		1929.07	3631.28
A0A0J7L4Z9	Conserved oligomeric golgi complex subunit 3-like protein	856.467		3437.4			319.559	752.399		686.36		472.716	451.851		385.177			419.583	893.379								1384.94					782.197	2093.04
A0A0J7L506	Acidic leucine-rich nuclear phosphoprotein 32 family member a	3033.7		9484.18			3854.39	1159.02		994.152	1482.44	3371.91	2563.82	1044.06	3647.53			1504.64	5702.26				3188.09	1023.67			1016.44	2545.92				3054.46	4430.73			2938.37
A0A0J7L515	Dynein heavy chain axonemal-like protein	20640.2	26338	46256.8	4709.7	14330.1	27799.8	28579.3	14681.8	26541.4	32351.9	22695.8	13267	27375.2	20320.5	24466.1	10645	26502.1	20341.5	23701.5	7343.43	16833.9	32547	23200.8	8755.18	27693.4	19040	37406.8	90924.1	155354	21598.4	12131.1	27269.1	130726		20392.9	22622.8
A0A0J7L519	Clathrin light chain						1544.1	99.4602			3274.65		2223.78	2002.99	2138.73				1197.29	3936.42	2376.6	3619.86	7661.94	6363.84		2024.14	5863.99	6822.35	4711.39			623.905	845.318			6603.27	4808.73
A0A0J7L530	Casein kinase i isoform gamma-3 isoform x1	2358.82		4327.59			2099.43	3120.25		3002.61		3332.33	2464.21	1718.45	2167.25	1749.69			2549.3	3833.44	1213.64		3017.79					1571.74				1192.04	1662.72
A0A0J7L533	Trifunctional purine biosynthetic protein adenosine-3	11923.3		14120.1	2651.97		8228.34	5722.47	14985.5	2742.27	2363.35	10751.7	14556	9981.46	14767.5	9513.6	10012	6389.88	13032.8	11882.4	4887.71		10589.7	12352.2	2474.6	8574.15	9229.84	6204.6			17226.3	10052.7	11764.5			8990.96	12776
A0A0J7L536	Eukaryotic translation initiation factor 3 subunit F	4724.6		12622.3			4543.24	5601.52		6198.07		5189.18	4732.88						5118.44
A0A0J7L542	Small ubiquitin-related modifier	9211.5	5890.15	15271.6		2116.62	17019	13335.2		7722.1	22003.7	13806.8	16972	4396.31	21542.1	4841.8	3074.29	12085.1	9854.32	10307.6	9981.27		18439.1	8374.25		6880.01	3181.57	9430.32	9479.55			1412.19	5678.96			2229.28
A0A0J7L546	Aminopeptidase	7860.31	5957.65	11955.9	3168.19	4068.24	10323.9	5704.49	8708.38	5492.75	37864.5	10173.9	8565.01	5332.31	9628.19	4411.14	5971.73	9172.88	9993.86	10578.7	5170.72	10929	12696.9	6917.01	4581.91	7960.37	6847.99	5855.3	9223.97	2080.68	10735.2	10363.6	14756.6			15812	8000.67
A0A0J7L548	Amidophosphoribosyltransferase	2317.86		4979.96			1400.82	610.6		607.498		2543.11	2813.11	1332.17	2946.74	1329.61		1267.17	3835.01	3417.56	1892.24		2018.4	2732.57			2127.42	2002.63				3255.57	5090.83			2846.64
A0A0J7L549	Selenium-binding protein 1-a	29024.8	38556.7	51180.3	14774.3	17462.9	50363	22619.3	34435.1	14254.3	221166	43538.5	33123.2	17354.3	34498.6	11949.6	18074.8	33051.2	63759.1	54102.7	65933.7	3940.46	13284.5	16286.4	15708	15129.3	15551.7	21100.6	27931.1	12798.3	13507.1	25721.6	62890.8	18429.6		28085.2	21591.3
A0A0J7L559	Adenosylhomocysteinase	26409.3	7680.88	33502.4	32787.7	29612.9	24424.6	15900	34832.8	22525.1	5248.53	34270.8	27335.3	33829.6	25484	27661.7	34922.1	40624.6	27869.8	39993.4	45647.8	7624.03	25954.7	35814.4	31957.8	36613.3	24986.7	25912.4	5189.22	1692.22	15950.2	28712	21872.3	3071.39		28398.1	30125.6
A0A0J7L566	Mismatch repair endonuclease pms2	38250.8		41524		2684.19	22386.9	37360.8	9517.17	27772.2		25015.6	32427.4	47513	34522.8	52821.5	4569.12	21342.4	28707.9	23865.6	4363.02		30102	23384.3	884.4	35841.6	34550.3	33398.4				50972.9	45888.2			19020.9	42849.8
A0A0J7L568	Polyadenylate-binding protein 1	2290.13		2415.84			827.968	662.32		586.939	586.782	2594.38	2188.11	324.294	1661.22	98.9237		557.733	2403.25	1985.4	553.892		1537.11					643.589	637.793			1960.32	400.348
A0A0J7L571	Alpha-mannosidase	3354.61	7884.51	6421.91		2776.28	52246	2668.34	3935.08	3877.09	128478	4017.87	10252.8	6029.62	9500.55	5301.04	2182.02	9437.62	8968.71	16171.4	6922.48	13543	6073.48	10532.8	2789.02	2074.32	5230.53	5938.72	12209.2	14822.1	6466.88	11001.7	5095.27	5337.26		15383.6	3464.36
A0A0J7L572	Tetratricopeptide repeat protein 14	1356.49		628.598			425.443	128.388				316.916	966.694		275.844				423.418													663.225	799.753
A0A0J7L578	Serine threonine-protein phosphatase 6 regulatory subunit 3-like protein			698.805			247.091			188.546		734.896							461.744
A0A0J7L581	PTN_MK_C domain-containing protein	277.372	1807.77	609.368			311.481	356.222			2134.46		716.195		626.822				47.9426					843.06
A0A0J7L582	Probable ATP-dependent RNA helicase spindle-E	3945.71					1427.94	1416		2219.98		3741.63	1194.06	2959.88	1850.3			757.239	2376.7													1655.88					79189.9
A0A0J7L584	Glycylpeptide N-tetradecanoyltransferase	1846.25		3306.94			618.203					620.639	1675.68	772.349	441.961	500.48			902.977										1400.14			1217.38
A0A0J7L587	Interferon-related developmental regulator 1-like protein	391.896		478.712			259.697	153.529					382.871		216.824				1081.85					2101.5				352.281				1389.92	2206.57			2635.06
A0A0J7L591	Metalloendopeptidase mitochondrial (Fragment)	1363.24		5738.65			1610.95	2333.25		2568.7		2602.75	781.13		1259.51	1210.31		1073.37	1772.33				1580.01	1321.18				2866.2					4353.79
A0A0J7L5A8	Programmed cell death protein 6-like isoform 2 protein	13989.4		17545.4	9183.18	6662.54	11887.1	19554.7	12182	16726.3	2218.05	17621.9	12722	9794.55	19646.4	10028.3	7645.49	11632.4	13560.1	6703.79	12880.8	11966.1	14505	9849.29	14478.1	9467.58	10974.6	10100.1	3426.3	4527.21		12297.2	4614.22			3367.84	9290.84
A0A0J7L5B2	Fasciclin-2-like isoform 2 protein (Fragment)	3510.72		1250.13				857.512																											321326
A0A0J7L5C6	Myosin-ia-like isoform x1 protein	919.266		867.526			1238.12	436.813		201.049	6331.65	612.211				2082.98			1242.6										10177.6	17994.7		1502.05		4538.64
A0A0J7L5D0	Glutathione synthetase	5310.23		16711.7			7334.43	12183.9		11477.1		7867.55	5174.16	4052.37	5904.61	4461.95		6398.45	5109.71	4287.94	1582.08		6242.7	5494.61		9421.47	7807.81	8520.83				2420.79	6484.94			6127.03	7603.55
A0A0J7L5D3	Tyrosine-protein kinase	1711.82			4513.34	7450.54	1848.59	1038.05		620.743	4543.73	940.868	1176.71	1382.98	1613.58	899.654	5032.83	2950.67	372.122	3265.26	2462.6	2584.28	3029.03	1033.41	3127.7	4886.63	3876.84	4189.84	4512.57	5989.14				3282.3		2825.27	3324.38
A0A0J7L5D8	Tektin	44733.9		66512.4	4397.42	2486.23	38702.5	46340.3	28476.5	48177.2	2325.56	44910.3	36710.3	46680.3	40527.6	52086.6	8914.66	31816.6	39346.6	29749.8	11038.8		39224.6	40413.7	7388.63	41948.1	42976.9	38133.7				27140.7	47633.6			56493.7	46729.9
A0A0J7L5E4	Dimethylargininase	2031.64		5151.18			2855	1986.86		1087.21	323.293	4492.74	1835.09	1619.87	2278.56	1131.68		1145.05	3976.77		1346.8	2866.39	4536.95	715.03			6633.63	1845.77				1920.06	3556.72			1724.64
A0A0J7L5E8	Nucleolar protein 58-like protein	458.212		187.536				86.708			4135.97		558.875		276.039	187.187													515.962
A0A0J7L5F3	Cap-specific mRNA (nucleoside-2'-O-)-methyltransferase 2	302.77		1106.37
A0A0J7L5G0	NADH dehydrogenase [ubiquinone] 1 beta subcomplex subunit 5, mitochondrial	19578.8		29769.7			12035	18729		20111.4		22622.2	9249.76	11167.9	10888	9456.17		13336.6	27203.3	5619.36	3131.3		8293.47	4830.48		12302.1	22064.9	15675.7				27592.4	34589.9			20522.7	20208.6
A0A0J7L5G1	Cytochrome heme mitochondrial	3069.11		3026.2			3378.88	1997.29		2117.29	1112.71	3947.57	2031.42	1391.42	1935.92			2573.6	3313.84	1196.59	841.929		2249.49	2153.39		2175.28	3404.78	4563.82					4378.61
A0A0J7L5G5	Lissencephaly-1 homolog	1746.41		4323.81	1617.85	2593.9	1856.84	2057.26		3381.24		5575.79	1321.7	1450.07	1871.53	1115.71	4655.36	2584.02	5819.59		4654.17		2943.33	980.186	4015.54	2501.34	2105.73	2255.63			3691.11	5097.85	7140.75			4200.69
A0A0J7L5G6	Cytoplasmic dynein 1 light intermediate chain 2						1146.18				1220.07		919.618	1029.12	873.958	268.259					775.987		1190.86	864.808			963.943	1167.53								2540.54
A0A0J7L5H1	RING-type E3 ubiquitin transferase	2972.53		790.822			2391.2	2959.29		4899.37		2010.86	3121.97	6935.02	2992.18	7698.9		1114.32	2389.72	3303.95	1658.23			3206.1		2627.98	3640.49	2819.26		6598.19		910.635	3211.03			2316.6
A0A0J7L5H4	Lysine--tRNA ligase	366.527	6314.1	1515.18	12343.4	13726.4	281.659	408.039	3119.67	108.221	3686.8	592.205	1009.26	1008.96	1135.53	1665.73	6886.79	10654.3	577.448	11485.3	9873.47	9263.47	4569.26	4536.51	16213.2	16210.7		3567.89	11506.1	14255.3	10909	482.593		29134.8		3601.83	16811.3
A0A0J7L5I2	Myosin heavy non-muscle-like protein	4368.49		4397.35	2257.55	3365.87	4515.52	1987.11		1732.16	4693.9	2863.52	7607.59	3850.97	4472.41	6609.17	13308.4	4200.24	3446.17	8667.12	5598.72	11444	9054.55	1410.36		3182.62	3318.22	2822.07	3280.51			6396.72	9178.5			3239.93	4434.86
A0A0J7L5J4	Enhancer of mrna-decapping protein 4			808.843
A0A0J7L5J5	26S proteasome non-ATPase regulatory subunit 4	1403.21		2086.65	8357.32	8642.27	2504.42	1608.39	16044.8	1697.2	1070.73	5945.53	1364.72	1821.01	990.914	2248.13	12172.2	3243.64	4685.01	4682.61	9360.41		965.382	1436.3	5534.74	3688.4	6279.61	2282.98	2743.27			1520.57	6389.53			5476.05	2325.36
A0A0J7L5J8	Poly-specific ribonuclease parn-like domain-containing protein 1 protein	1132.29		3682.63				898.443		762.566		1117.13	299.234		256.842			951	865.98									1430.64					2379.38
A0A0J7L5K4	Electron transfer flavoprotein-ubiquinone oxidoreductase	1663.83		979.709			983.653	756.065		783.645	2220.79	908.161	1866.68	1227.5	1320.33	1854.7			1258.13				1675.04					1894.64				2010.13	1532.26
A0A0J7L5K5	Md-2-related lipid-recognition	2552.77		28720.4			3503.46	1519.57		514.805		267.996			559.896				1478.02														1411.66
A0A0J7L5L2	Glutamine-rich protein 2	186998		188940	6453.48	8524.85	115861	125508	86664.3	168206	2300.06	179262	165568	122151	121703	208196	25752.5	141049	165048	97922.9	31178.2		124687	142244	12484.8	159369	121201	150618	171087		70973.7	116252	166944	169356		230719	105014
A0A0J7L5L3	Cilia- and flagella-associated protein 45	61925.5	4121.99	75348.5	4790.85	2446.79	56981.1	63313.5	21272.9	76989.4	3262.38	71289.1	39239.5	37592.6	50786.7	43905.3	16693	42352.6	46797.6	31596.9	17689.9		41587	35401.7	6374.07	41239.1	29097.8	51812.5		2990.34		35402.7	82755.9	2391.37		45951.1	42261.1
A0A0J7L5L7	PDZ domain-containing protein	1686.21		1957.43		1087.22	1877.51	1226.49		986.326	474.767	1383.69	3127.36	1449.29	3164.29	2068.43			1462.38		1572.99		5258.65	1202.61			814.644	1036.02				1631.05				1524.8
A0A0J7L5M6	Dolichyl-diphosphooligosaccharide--protein glycosyltransferase 48 kDa subunit			1533.49			318.124	101.793		230.849		218.784			298.009				693.616														571.891
A0A0J7L5P1	Beta-parvin-like isoform x1 protein	374.882		801.832				131.589							709.499				609.402													433.019	348.595
A0A0J7L5P7	Turtle-like protein a protein	1557.95		2705.51	4745.37	5608.29	2192.78	1762.62	11187.4	2675.71		3349.32	2211.98	4453.77	2689.92	4268.57	7288.96	5914.43	3531.19	6135.27	8476.93			10522.7	5332.8	8154.14	9430.27	3203.13				3266.65	21441.3			34391.5	4108.22
A0A0J7L5Q7	Eukaryotic translation initiation factor 2 subunit 1	3954.78	66470.9	5380.49	4196.27		3250	1402.9	12202.9	875.215	3974.46	2705.51	6531.15	4136.8	6064.5	2906	4309.32	4316.36	3326.17	4489.28	2609.49	3250.53	6531.71	1552.08	3303.15	2396.08	1955.72	2916.97	33230.2	42703.4		3497.61	1709.44	2452.64		791.002	4472.22
A0A0J7L5R3	Endophilin-b1 isoform x2	621.888		1619.55			514.953	404.236		712.063		814.667							886.107														3057.53
A0A0J7L5S3	Dynein heavy cytoplasmic-like protein	1609.59	12212.9	2589.61	11869.6		1285.81	602.464		560.718	2238.52	1529.48	1874.47	1522.9	1727.88	1659.91		2001.5	1959.67	2692.56	1340.44	7850.02	3500.68				1393.89	1481.46	2485.39			2691.89	1973.37			992.433
A0A0J7L5S9	Moxd1-like protein 2 protein	2576.31		2762.39	4409.92	11888.8	3244.78	2748.38	7729.34	2864.42	11065.2	3095.25			1248.29		11189.6	1164.82	1009.93	8733.72	5376.83				4864.5			842.837	5973.64	10796						2339.47
A0A0J7L5T4	Aldose 1-epimerase	17445.9	90424.4	15486.7	13772.7	50599.3	26512.5	20874.1	62901.3	13208	237882	20338	18572.9	20726.6	17247.1	18985.8	28626.6	28119.4	28472.7	59608.8	72020	28775.8	18055.7	22015.9	36044.1	17553.2	18043.3	17440.5	51410.6	54243.8	13603.2	31536.4	28305.6	27039.8		29087.6	37469.2
A0A0J7L5T5	15-hydroxyprostaglandin dehydrogenase	933.558		604.316			329.434	165.531				724.786	2285.98	620.13	1738.06	824.424			805.919				1525.83	919.637
A0A0J7L5T7	Isocitrate dehydrogenase [NADP]	181309	65373.2	206906	246309	289267	268990	199806	387348	162412	54523.1	187570	217452	257895	182150	143806	315294	339396	148360	326260	471394	150033	186052	197311	298511	326313	288673	345008	53211.8	26638.8	315683	134412	144194	9480.32	100126	203242	281076
A0A0J7L5U6	Down syndrome critical region protein 3-like protein	2125.92		19966.6			9213.38	31868.6		57291.6		37715.1	51164.1	9646.74		11092.1		35643.8	22658.9	23639.2	1518.43		875.48	4773.54		12759.7	65512.6	47340.4					14473			160065	33650.1
A0A0J7L5U7	Transcription factor hnf-4-like protein	812.821		778.578			277.207					402.262	625.048						287.565													567.842				1040.65
A0A0J7L5V0	Galactose-1-phosphate uridylyltransferase-like protein (Fragment)	2394.87					1581.96					1922.81	2149.88		2277.27				2870.52				2576.16	5349.28								1338.49	3135.56			9454.88
A0A0J7L5V5	Sarcoplasmic calcium-binding protein 1-like protein						619.396			149.626																		878.321
A0A0J7L5V8	Coiled-coil-helix-coiled-coil-helix domain-containing protein mitochondrial-like protein										2935.49	1999.19	953.922	1140.44		578.498								805.383			846.872		825.946							3697.64
A0A0J7L5W3	Unc93-like protein	1708.73		2752.62	1450.88	5736.55	3687.89	2916.82	4540.54	3239.49		840.348	1519.68	1913.37	2568.89	1686	2077.19	3945.89	8666.91	3562.56	592.878		3537.12	702.068	8095.6	3443.84	2272.4	2566.06				19737.8	3792.85			681.228	377.851
A0A0J7L5X4	Choline ethanolamine kinase	338.496		1613.93			205.021	498.202		301.338		191.238	246.915		266.756				637.69								804.274	605.387				558.157	1366.32
A0A0J7L5X5	T-complex protein 1 subunit eta	12850.2	4894.34	30250	30161.6	37712.2	14717.5	16191.1	21566.4	17059.6	3884.62	19003.5	10162.3	10582.5	18138.8	11821.6	44599.9	30594.3	12229.3	36369.4	25610.9	18230	9543.54	15081.7	24163	16270.7	19562.5	22329	4796.2	1856.98	32200.7	18900.2	17333.1	2180.03		11495	13307.2
A0A0J7L5X7	Myosin heavy muscle	916.576						373.326				5577.52	3606.29	712.516								21410				3120.34		818.773
A0A0J7L5Z4	DNA helicase	469.02		1743.14			27091.2	371.562		210.899		40174.4	360.878		12027.5			13688.6	223.966	5033.35			12339.2	6509.94				12497.2
A0A0J7L600	60S ribosomal protein L32	2171.44		4522.34			1295.61	469.822		587.692		2186.21	1952.6		3319.24				3738.9				1539.48	421.944				1357.55				3571.1
A0A0J7L608	Domon domain-containing protein	847.328		1173.13			842.015	1037.82		1051.31		1182.76	836.696	1598.35	885.482	2271.96		1074.5	1201.3	2436.83			1488.82	291.413		2285.9		1230.72					2057.99				1276.36
A0A0J7L612	Alpha-glucosidase	5975.57		2353.49	9887.72	8288.08	7054.6	3719.78	10152.7	5277.48		4060.74	6052.5	6559.78	15855.6	7712.06	9517.75	8074.89	16030.2	11447.4	5789.67		7838.29	4368.11	13680.3	9084.78	10820.6	6512.37				35275.4	27467.9			10038.8
A0A0J7L613	J domain-containing protein	6649.15		11019.9	6254.67	8537.62	6797.81	7224.57		8822.57		6561.71	5028.41	7899.36	5956.69	8512.67	8073.08	7018.08	6102.61	10095.5	5298.41		6309.43	3218.25		6498.88	7501.82	7861.21			5495.17	5787.83	13880.9	1817.04		5878.67	17613.1
A0A0J7L614	G2 mitotic-specific cyclin-b	784.808		2186.09			441.048	908.439		1050.49		625.092	606.745		788.635				617.766														1412.98
A0A0J7L622	Tubulin beta-1 chain	172871	48938.2	416308	15601.7	13341.1	28266.3	80673.9	83182.6	130870	40949.1	149797	66018.9	84651.4	58178.9	192716	46248.8	132143	215238	103023	39098.4	220409	79822.6	50021.9	23175.2	320194	185959	56852.3	37094.2	25888.8	83123.8	59528.8	351719	15288.3	729129	88614.2	215796
A0A0J7L627	D-2-hydroxyglutarate mitochondrial	27366.6		46458.7			13094.9	20007.6	15285.2	23386.4	5307.15	18360.1	11014.7	18795.6	12453.5	17126.5		17645.4	17817.6	10365	4017.25		19873	14807.9	55385.6	20122.1	14824.4	16236.4			112157	12328.4	31296.8			50773.6	25928.5
A0A0J7L631	Sumo-conjugating enzyme ubc9	1783.2		2149.23	1773.6	2269.06	2942.82	1286.68	4000.15	1959.14		2173.97	1785.96	2432.7	2329.17	2351.89	4028.63	3014.67	2351.27	3732.52	4157.22		3053.29	1139.91		3182.56	2337.32	3400.91				1578.7	1443.07			2500.07	3820.26
A0A0J7L632	Lish domain-containing protein isoform x2	1762.16	2285.29	2832.18			1695.83				3189.09	1015.24	3911.39	788.555	1309.8				3438.58	2074.34			959.79	380.974				825.81	5127.51			3597.22		2414.06
A0A0J7L641	1-phosphatidylinositol 4-kinase	630.03		817.143	3159.56	2694.88	935.875	1351.91		614.299	1168.61	925.557	774.686	770.243	916.587	1030.18	2371.29	1347.1		1757.51	1482.08		1682.79		5657.9		1552.37	1046.79								668.591	2296.23
A0A0J7L644	Rna pseudouridylate synthase domain-containing protein 4-like protein																		267.961									166.791
A0A0J7L646	Protein peanut-like protein	387.399		1463.48			431.217	223.297		89.3197		986.76	430.323		741.99	347.713			830.502				1816.45					365.675	582.573			1044.49	1251.81
A0A0J7L648	Multifunctional fusion protein	158930	28258.9	106130	8577.1	9043.82	122693	18387.8	94254.6	8052.28	24404.7	67869.1	160016	89010.4	123784	58325.1	23715.8	53040.5	183652	64089.1	59153.6	51067.3	55347.2	143443	23970.2	48289.3	70816.5	53503.3	36057.6	12405.7	83514.6	134502	54443.8	17793.4	33796.4	79538.8	39283.5
A0A0J7L657	Ubiquitin-protein ligase e3a	427.129			1467.3	2877.18	447				1360.84	592.61	703.359	1259.08	801.42			748.419		1680.68	2898.76		1164.94	426.053	1578.7		1001.71	1304.5								1549.01
A0A0J7L659	Pseudouridine-metabolizing bifunctional	379.062		400.288				140.519		100.379		806.276	441.312		388.072				329.656														1867.17
A0A0J7L661	Eukaryotic translation initiation factor 5	2727.96		7514.87	5874.67	5505.54	3011.87	1628.43	5296.33	1950.72		4859.69	1970.77	1304.57	1787.61	823.712	7915.23	2939.52	3847.6	4871.48	5378.26		2523.14	2578.24	5842.02			4080.58				4091.79	3823.64			11565.4
A0A0J7L666	Reticulocalbin-2-like isoform x1 protein	1213.51		1370.44	2574.9	4875.93	1423.84	606.453		2033.71	1856.76	1568.36	783.465	1939.22	389.114	2309.3	5048.89	2726.32	1380.88	3587.91	7917.74		963.812					1412.16					826.635
A0A0J7L675	Isocitrate dehydrogenase [NAD] subunit, mitochondrial	3422.16	11879.2	8999.23			3156.44	4895.05	6546.27	1759.65	3926.2	3258.47	4885.99	6359.78	10783.4	4203.37		3670.39	4146.53	6610.02	2293.87	5688.82	5747.01	7311.78	4091.78	7727.35	9541.59	6723.08	2738			8331.03	6952.12			5262.61	7743.42
A0A0J7L677	Larval cuticle protein a2b		21207.2								48061.3										928.189	4586.89							11135.1	3363.8				4678.74
A0A0J7L681	Proteasome subunit beta	1510.85		1342.71			1962.85	1120.85		887.455	1130.44	2083.44	334.106		1196.23	863.909	3841.79	1198.35	708.644		2800.88	2428.83	1248.62	2620.3				988.756				1654.91
A0A0J7L682	Ubiquitin-conjugating enzyme e2 r2	2219.81		1816.36			651.836	1276.49		1928.05			2376.96		2968.59				2342.72																58623.6		2742.27
A0A0J7L685	Filamin-a isoform x2	1137.44					672.272			292.688		797.235	1439.57		1506.81				565.622			14319.9	1695.19	805.002			2496.15	1345.28				2666.58
A0A0J7L690	FACT complex subunit SSRP1	2079.55		2499.46			810.065	962.833		496.23		1506.95	1245.73	1304.7	803.624	1154.45			1920.67	2096.03	686.493		1230.47	297.6		1778.5	1177.46	1220.22				1451.29	4195.52			1822.32
A0A0J7L691	Sumo-conjugating enzyme ubc9			1438.27			684.686	474.577							1021.99				446.672					151.915									2135.28
A0A0J7L696	Phosphoglycerate kinase	85749.8	12687.3	123554	34560.8	46519.7	80588.9	113508	73024.3	92337.5	78619.3	131668	54862.2	35597.3	81935	25798.1	51272.2	84035	93378.5	87440.7	83887.1	17675.1	96650.8	37682.6	48663.3	62005.9	43708.4	75010.4	18529.9	8763.21	46620.7	85868.6	91122.6	7645.08	153611	42033.6	93698.9
A0A0J7L6A2	NADH dehydrogenase [ubiquinone] 1 alpha subcomplex subunit 7	26126.7	6385.37	30325	3356.29	5406.55	32619	38331.7	12880.3	39098	4670.19	34122.7	26159.5	32489	26658.2	18927.6	6120.53	32068.4	20825.2	39342.4	20103.5	1473.38	33465.7	8259.16	6363.34	31590.8	23485.4	39535.4	4448.13		8679.19	22161.1	18220.6		122739	11589.5	30764.9
A0A0J7L6A4	Leucine-rich repeat-containing protein 23-like protein	2936.3				14502	1876.34	2187.07						7324.14							19115.2	186357			11562.8	13897.3		11361					4484.32			60176.2
A0A0J7L6A5	Protein disulfide-isomerase	22761.8	25038.6	10295.4	4608.81	8883.62	17555.2	6083.74	9717.38	6324.53	24436.5	7305.1	38617.7	9218.27	15328.6	11935	7110.83	21659.7	26200.1	23483.2	13567.1	17615	12056.5	20240.6	5372.09	17163.1	8446.71	12535.2	9810.27		16276.5	18229.2	9822.53			17211.9	16153.8
A0A0J7L6B2	Dna-dependent protein kinase catalytic subunit-like protein	790.04		648.98				214.697					587.794	846.165	711.579	396.466			773.11				1415.47				795.717					945.972
A0A0J7L6B6	Aldehyde mitochondrial (Fragment)	16230.9	22208.1	9335.7	2552.65	4702.22	22219.3	13148.2	15423.2	18829.8	17047.5	43223.9	33413.2	57279.6	17980.4	19528.9	7160.76	13284.8	9089.99	24670.7	10591.9		13788.6	12018.1	4315.31	23991.2	20706	32121	5117.91		20149.6	15529.4	13352.3			20856.8	20895.7
A0A0J7L6B7	Microtubule-associated protein 10-like protein	41429		57288.1		3136.72	46748.6	65853.5	9638.29	51230.4		43624.1	47954.1	56240.4	54466.2	22680.1	4625.86	35640.5	32863.2	30395.2	5426.23		60927.9	18082.6	3697.73	41333.1	32359.9	47204.8			12733.8	50383	43559.6	5403.74	120465	18009.9	36127.4
A0A0J7L6B8	Phosphopyruvate hydratase	154842	117906	272225	230099	230145	227701	185179	344674	235840	413021	332706	155002	92743.7	249680	71972.1	312880	425038	213534	220075	634347	43344.5	256464	164730	310273	281751	230221	241588	148412	86306.4	167991	157352	185549	25251.8	649635	94845.1	169227
A0A0J7L6C3	Spectrin beta brain 4-like protein	2555.12		1057.45				724.196					1201.31					5932.83	893.748				1237.94										887.574
A0A0J7L6D8	V-type proton atpase subunit d 1-like protein	4746.95	5765.67	2973.21	2096.56	1148.74	842.307	1368.57			1625.97		805.435	812.383	887.119		3032.94	1546.01	1057.84			3937.23	2424.59				1782.35	1832	3673.82	1941.48		903.606	1745.05			1490.44
A0A0J7L6E1	Ras-related protein rap-2c	300.646		244.928		851.784	446.781	226.644		267.006	2088.65	308.745			130.839	262.779			817.737				366.126					343.084	2271.27	7214.85		370.651
A0A0J7L6E6	L-2-hydroxyglutarate mitochondrial	925196	49949.4	725368	30089.2	36554	791926	730693	323175	978049	42544	923395	552478	654844	691818	515120	97893.7	699827	1104680	609831	136906	34363.6	738000	422100	52416.2	652748	598430	922012	17542.1	19849.9	223358	805766	1247450	120137	1266590	272807	789577
A0A0J7L6E8	Cuticle protein 6		4765.18								15675.9																		3653.25
A0A0J7L6F2	Putative peptidase c1-like protein						1718.25					913.009	2297.15		2383.11				1558.49				2442.83		4721.21				1211.04			2835.18
A0A0J7L6H3	Sortilin-related receptor	1574.29		878.662			1479.31	721.011			1399.57	1457.24	2824.77		1822.25	1016.11			2398.22				1705.36				1054.57		1799.83			1198.82
A0A0J7L6H5	LAM_G_DOMAIN domain-containing protein	153248	22452.1	100779	9477.14	8333.03	137415	165287	51944.5	192067	47362.5	147925	88874.8	62921.6	145940	72919.4	20251.3	107064	102011	85988.2	35310.7	28446.4	99359.7	68168.4	16320.6	79121.7	54277.2	120747	5467.54			53388.4	132800	84442.9		139279	49683
A0A0J7L6I2	Protein cueball-like protein										2245.08
A0A0J7L6I3	NADH dehydrogenase [ubiquinone] 1 beta subcomplex subunit 3	6692.05		10971.9			7667.54	15876.2		6703.04	619.041	6637.87	5840.35	8822.74	5480.4	11957.9		3385.46	2651.91	2329.49	3961.34		6192.03	2122.95		10856.8	6604.02	8269.72				3301.93	7202.37			6333.81	3587.37
A0A0J7L6I5	Membrane-associated protein hem			752.953															170.278														655.312
A0A0J7L6J6	Long-chain-fatty-acid--ligase 3	20803		25790.7	3801.13	9310.31	11090.6	16751.3	8740.99	18664.8	4449.62	16511.8	16030.2	13913.3	13697.5	20072.2	8594.44	13896.5	16265.8	15861.6	8005.69	3195.16	18509.4	4408.57	5949.65	14287.8	10293.7	12705.9	3898.34			12632.2	11638.7	4655.46	141524	4361.22	18376.2
A0A0J7L6L1	Dna damage-binding protein 1-like protein	12294.3	15648.7	11958.8	31469.1	30880.6	18225.7	13230.9	31122.4	17363.7	2685.94	25954	10211.8	11619	14087.1	10077.5	32758	28186.1	13402.9	28174.4	33897.9	1701.21	15207.5	14164.1	39462.9	22542.1	18378.9	22752.6	3164.71	4775.8	21634.2	14372.9	10010.8	2949.11		21531.1	23396.8
A0A0J7L6L4	Ef-hand domain-containing protein 1	108771		180684	4046.3	3639.66	109830	109277	34579.1	128435	3397.95	128782	79853.6	99038.2	86153.3	102738	10828.2	76267	116014	79388.8	25535.9		94302.1	51285.7	5792.7	92254.2	68209.9	124201	1030.45		32914.4	73017.5	155460	17091.5	165190	47415	71137
A0A0J7L6L8	26s proteasome non-atpase regulatory subunit 10-like protein	1020.09		2032.38			1171.6	1059.5		2068.31	669.38	1260.65	1248.02		931.052	1597.18		1590.98	1867.63	817.883	936.383		1366.03	1324.96			2430.25	1154.11				866.186	3150.88			3398.05
A0A0J7L6M1	Palmitoyl-protein hydrolase	4966.31		2918.64		1187.55	4434.33	4613.25		2646.64	1222.23	2331.96	3624.33	6500.98	4629.7	4165.52		4306.47	2335.63	4293.65	2238.32		5922.05	2424.4		6693.64	4064.85	6142.26				3263.97	2679.03			1970.86	7742.72
A0A0J7L6P9	Neuropathy target esterase sws	824.426		1896.26			1055.67	1072.13		1099.65		1080.65	746.604		1163.63				1134.7				1133.35					1597.06					3813.43
A0A0J7L6Q0	Flocculation protein flo11-like protein		1369.56								5022.17																		829.911
A0A0J7L6Q7	Magnesium-translocating P-type atpase		2903.58								3319.48				869.892							3278.52							3961.05	3188.69
A0A0J7L6R0	Gata zinc finger domain-containing protein 8-like protein				46865.6	216413			182150								143971			59227.6	35508.8				86405.7
A0A0J7L6R3	Midasin-like protein															4364.45	2899.81		8220.86	4416.72			5662.54	27326.5												35700.1
A0A0J7L6R4	Protein takeout	6091.31		10680.4			5394.45	7719.86		6127.62		6581.25	5104.07	6344.11	4214.79	5225.96		3073.56	4891.05	6646.71			3757.52			4696.36	3503.09	5162.32				7073.42	7776.48			2686.02	2484.75
A0A0J7L6R8	Cytokine receptor												768.581
A0A0J7L6R9	Abc atp-binding protein	78150.8	7208.23	97750.6			70630.8	113071	23123.9	94291.4	4578.85	100275	41710.9	31159.7	70036.6	28769.2	7168.62	41568.1	78220.4	33414.9	3967.1	3797.39	65342.6	22267.8	4054.62	29518.2	29135.9	72014.9				31533	85321.2	8774.24		13594.5	29405
A0A0J7L6S3	Cytochrome b-c1 complex subunit 7	10204.8		26023.8			10402.1	19895.2	8056.82	14496.6		20368.3	10155	4705.96	12294.5	1704.32		10242	11844.3	6039.59	2836.92		9117.54	12457.9		6702.94	9745.21	10817.1				19803.7	7826.46			7161.99	7174.61
A0A0J7L6S8	Poly [ADP-ribose] polymerase	3526.96		1744.44			1467.8	544.697		367.689		2123.13	1960.08	1521.45	1604.53	1157.67		3534.46	2463.64				2220.89	979.355			5387.56	1151.97					4345.58			2674.35	8100.46
A0A0J7L6T1	Methylthioribose-1-phosphate isomerase	828.976		3327.71			960.188	704.602		753.155		1813.72	269.011		748.141				2082.91									567.574				613.977	2954.05
A0A0J7L6T2	Phospholipid-transporting ATPase	1704.68		2840.09	1268.89	2394.22	2239.58	1066.38		1676.64	3129.95	1282.5	3345.57	1642.33	3413.59	3490.46		1726.41	3056.98	2661.68	1519.48		4219.23	1774.64	2480.68	3474.06	3391.97	1703.96	4500.86	5256.45		3319.23	4075.03	2349.3		4592	3834.64
A0A0J7L6T5	Ubiquilin-1-like isoform 2 protein	19797.5		16942.1	13703.8	11813.5	14523.5	30862.4	12334.2	20169.8		17043.9	12478.7	11087.2	14176.3	9970.75	16061.6	8568.73	10512.1	8648.42	23305		8331.64	2444.22	12162.2	7126.62	10239.1	17950.1				2941.08	8773.28			2099.93	5506.76
A0A0J7L6T9	Kynurenine--oxoglutarate transaminase 3-like protein	8693.73	8071.56	8903.53	1914.73	3654.03	8873.3	3273.19	14660.3	5400.88	25665.2	9140.37	10565.8	8654.21	9801.12	6125.31	9761.08	7682.8	11008.5	11709.3	6160.91	6523.93	14041.1	11377.2	3318.19	7039.52	9414.28	6540.92	7001.75	5476.66	4433.53	7238.98	11903.2	2238.68		4787.04	5643.08
A0A0J7L6V8	Rad50-interacting protein 1-like protein	2223.17
A0A0J7L6X0	Mitochondrial-processing peptidase subunit beta	175977	25408.1	212095	8455.78	12286.1	141524	177881	62744.9	190447	9694.88	174900	150031	247097	165893	216848	24934	126751	150928	102806	40666.3	8083.04	127208	189242	9885.94	123346	201769	163565	4697.36		66751	133864	134834	9340.17	317709	205414	158775
A0A0J7L6X2	Bee-milk protein										4056.12
A0A0J7L6X4	Facilitated trehalose transporter tret1-like protein			5490.1
A0A0J7L6X8	Hyccin-like isoform x2 protein			1033.64				239.618		210.784		110.272																					362.417
A0A0J7L6X9	Methylcrotonoyl-CoA carboxylase	8611.38		17289			7141.82	14616.9		10339.2	5517.31	6993.02	8175	11896.1	8651.91	10631.7		7062.73	6465.55	6036.33	3077.52		6886.46	8095.94		8716.82	9380.18	15115.6				5371.25	12573.3			7445.11	8715.86
A0A0J7L6Y1	La-related protein 4	1919.59		2399.18			1278.16	1181.87	6257.33				6815.37	3363.49	6267.87	3126		1215.76	1833.74	3694.02	2120.82		11085.3	17606.7		2716.15	3753.69	1817.99				4767.58				18834
A0A0J7L6Z4	60s ribosomal protein l3	2258.27	958.272	2842.87			2348.12	683.6		737.505	1153.59	2033.8	3355.84	3091.94	3126.23	2067.76		913.297	3219.55	1906.14	1120.15		4094.5	2742.01	1048.73	1522.82	3097.62	717.851	1272.75			4805.37				7128.94
A0A0J7L6Z5	T-complex protein 1 subunit beta	10955.6	4048.79	11167.7	35852.7	43164.2	12617.1	9927.24	25173.7	11421.1	4695.08	13859	9162.49	10986.5	16142.3	10319	39705.5	26194.5	8603.36	25879	35646	11204.8	12831.9	10903	35908.8	20864.8	15555.7	20739.5	6600	9989.4	32746.1	10843.4	11188.6			13894.8	21604.5
A0A0J7L6Z8	Protein CLP1 homolog	4143.9		10270.1			3856.22	7271.18		6560.76		8724.81	3304.98	2975.44	6584.39	2033.48		1809.6	10375.5				5376.16	2268.99			5198.29	2974.26				7993.11	5253.6
A0A0J7L706	Eukaryotic translation initiation factor 4 gamma 3	3465.03	4937.91	7818.2	3605.49	4357.4	2473.98	1208.36		1123.29	6428.2	3574.99	5451.45	4595.73	3729.22	4669.35	7696.66	3156.39	2403.07	4354.46	7452.87	4832.22	4542.26	2301.89	7576.46	2749.4	4379.35	3107.96	7174.94	22079.5		1831.1		5462.53		5921.51	3807.71
A0A0J7L714	Tubby-related protein 4-like protein			63.9188									138.313
A0A0J7L715	Delta-1-pyrroline-5-carboxylate dehydrogenase, mitochondrial	194808	3719.2	297369	5530.83	6861.22	150583	256315	76389.3	251664	13559.9	221659	181227	197703	192502	225582	21775.3	155960	182279	108286	36420.8	1784.33	205916	126278	14205.9	149651	159975	182291	3783.08	3392.24	65218.2	143081	188275	51531.5	422362	134613	198668
A0A0J7L730	Myosin heavy muscle	6694.62		529.32	991.903	547.003					748.357	723.867	9421.89			886.233	3935.26			2103.99		6533.1			813.932	3203.94		581.594	721.532
A0A0J7L732	Protein kinase c and casein kinase substrate in neurons protein 2-like isoform 1 protein	567.696		1654.69			745.314			634.502	897.005	546.299	806.996	880.868	866.316	509.031		456.518	1163.56				1081.29	555.999			1108.57	398.253					3007.88			1213.59
A0A0J7L739	Ribosome recycling factor							128.355							893.102
A0A0J7L746	Kelch-like protein 10-like protein	5968.62		18366.2	16005.5	25564.5	6278.46	2554.85	15536	9423.23		14794.8	1867.68	4244.53	3726.21	8335.66	22261.8	9827.72	7417.96	14463.3	8070.68		7557.31	5736.5	24867.6	9223.15	8183.5	3788.41				10611.8	7573.02			5051.47	4898.07
A0A0J7L754	Folliculin-interacting protein 2	18007.7	2067.65	37974.7		1119.29	12910.7	18637.8	6050.18	10450.4		19203.6	13357.1	18862.2	8187.83	15204.1	2015.38	7183.17	16432.4	7842.84	4110.21	1056.25	9321.85	2070.76	1207.6	6584.57	7982.53	13201.6				16500.3	26266.8		29718.9	2155.21	5846.32
A0A0J7L764	Wd repeat-containing protein 61-like protein	1030.26		3125.17			792.679	467.564					1232.64	795.161	755.989	1081.06							1699.7	1696.59			1767.21									1992.68
A0A0J7L766	Atp-binding cassette sub-family g member 4												2877.25
A0A0J7L769	Serine threonine-protein phosphatase 4 catalytic subunit	8628.23		7713.26	3077.62	5326.9	7582.37	11347.2	4577.32	7470.32		5284.29	4806.14	4136.61	5262.74	6999.53	5632.51	3300.74	3932.4	3621.94	4266.83	4335.57	5066.07	1800.03	2533.36	3224.32	4101.35	5826.38				4828.61	2889.88			2392.62	2749.58
A0A0J7L773	Putative 26s proteasome non-atpase regulatory subunit 3	14693.1		22154.8	27318.7	32594.7	13022.1	10332.9	37174.3	19006.2	2052.94	21656.5	11692.8	8370.14	11310.4	18226.2	27956.9	24905.3	13039.4	33429.6	26537	8860.16	14569.4	14727.6	24528.5	14929.9	27986.7	15884.3	2616.91		12602.8	21203.1	17866			30402.1	12908.7
A0A0J7L774	Insulin-like growth factor-binding protein complex acid labile chain protein	407.306		2985.48			520.964	311.512											893.479														1636.68
A0A0J7L775	Mediator of RNA polymerase II transcription subunit 18	607.598		401.006			270.045	172.341				382.481	1051.26	505.584	963.989				496.465				592.197
A0A0J7L779	Polyadp-ribose glycohydrolase arh3	2101.96		2410.5			1441.39	2422.74		2110.32		1959.27	2033.5	5057.86	2626.41	2717.62		1335.93	1937.88	2709.89			1951.13	976.091			2663.23	1851.46				1626.14		2569.54
A0A0J7L788	14-3-3 zeta	129850	26387.6	53571.4	19171.9	19237.4	138811	89361.5	62435	75492.4	57523.1	129181	256154	133574	216074	127981	40536.4	87867.8	125626	81912.5	68753.5	102382	491514	83896	31239.5	139957	206058	138740	52990.8	50192.6	197129	377503	109322	19275.8	346775	121109	129184
A0A0J7L792	VWFC domain-containing protein	968.242	62859.7	2739.4	2923.66	5413.19	1571.16	4315.06		687.835	476107	2198.26	1879.49		981.229	2418.67	8269.88		940.82	10733.7	7854.8	7183.13	1458.31	223.213	2265.56		4309.22	1126.73	195042	94515.4	18742.6	1295.41		24174.1		3598.3	1407.79
A0A0J7L794	DNA repair protein XRCC4	229.433		339.014			180.709	144.732				222.93	775.022	510.149	399.275	498.705			545.367		1585.37		1407.11	133.152				344.036								201.652
A0A0J7L7A2	Procollagen--oxoglutarate 5-dioxygenase 3	622.573		2971.71			2405.78	408.556		344.85		683.744	3023.47	1584.16	1690.5			2301.37	3210.45					2177.1				1237.91				2589.72	3287.93			1771.16
A0A0J7L7A5	Endocuticle structural glycoprotein bd-2	224391	11095.3	536768	6713.61	8205.12	225384	318265	72749.6	347525	6992.53	304950	137394	137171	178025	137668	4484.55	146152	260590	110110	28841.3		175210	41078.5	13906.1	68907.1	115124	159316				93449	342965	85465.9		48090.9	117454
A0A0J7L7B7	Actin-related protein 3	1429.08		2350.07			1297.13	869.612		950.486		1330.22	2179.97		1764.22	1752.78			1862.79				2949.88		1167.27							1274.78	1869.68
A0A0J7L7B8	T-complex protein 1 subunit epsilon	29170.7	15713.2	25866.2	65956.9	68565.1	27272	19439.9	49139	30298	6549.55	39596.6	18359.3	21820.8	31141	28228.1	64165.8	55863.9	27893.6	60354.4	61457.7	33959.8	25688.7	26408.4	60454.8	33722.2	24642.9	40853.6	12923	8079.76	33753.2	48637.2	57111.4	13532.9	33371.1	58643.3	39875.4
A0A0J7L7B9	Apolipoprotein D	6167.98		3639.1	2447.76	3343.92	5227.73	5235.48	2923.08	2259.75	3132.79	5104.32	4834.76	4923.29	7969.5	2466.76	7247.42	3018.54	6078.71	3980.52	3850.12	12679	8499.7	1369.41	2591.54	6609.19	6787.44	5328.83	2712.73			9536.46	5297.57	3829.19		1757.54	1525.77
A0A0J7L7C7	Protein mo25	6349.26		11724.9	6307.08	12014.9	6765.73	6279.57	14390.5	7810.09	5173.46	11169.9	5364.18	2730.37	7821.75	3139.68	11052.5	9932.75	7599.44	11430.5	6748.47	6823.92	8670.83	2966.74	15190.8	9737.65	8097.19	7405.08	3372.06			10802.1	5766.17			4527.39	11480.5
[truncated: 665 more rows]

## Sheet: Lasius metadata
File.name	Sample.name	Group.long	Well	Injection.order	Pool.group.number
Lasius_3-31-2023_Slot1-01_1361.d	LPE18	Established	A1	1	18
[truncated: 35 more rows]

## Sheet: Lasius limma - virgin to incip
Protein.Group	First.Protein.Description	logFC	AveExpr	t	P.Value	adj.P.Val	B
[truncated: 1,108 more rows]

[truncated: 9 more sheets: Lasius limma - virgin to estab, Lasius limma - incip to estab, Lasius GO virgin to incip down, Lasius GO virgin to incip up, Amel data, Amel metadata, Amel limma - virgin to incip, Amel GO virgin to incip up, Amel GO virgin to incip down]
